# Supplementary material for: Primary and hTERT-Transduced Mesothelioma-Associated Fibroblasts but Not Primary or hTERT-Transduced Mesothelial Cells Stimulate Growth of Human Mesothelioma Cells
Source: MDPI journal article supplement (doi:10.3390/cells12152006), 2023-08-05
Supplement: s1 [file s1]

Original images of polyacrylamide  
gels (telomerase activity assay)

A

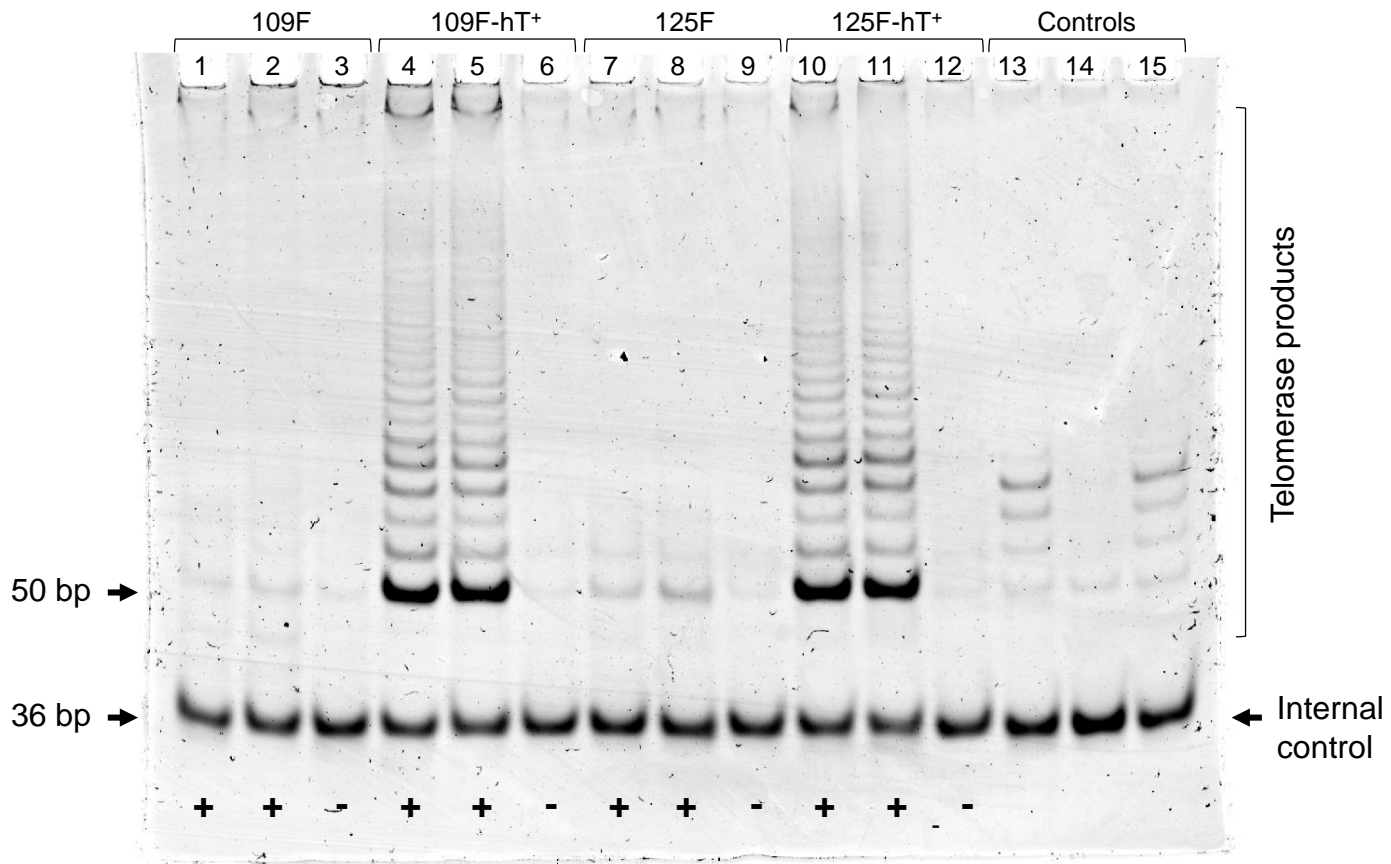

Lane 1-3: Meso109F (109F)

Lane 4-6: Meso109F-hT<sup>+</sup> (109F-hT<sup>+</sup>)

Lane 7-9: Meso125F (125F)

Lane 10-12: Meso125F-hT<sup>+</sup> (125F-hT<sup>+</sup>)

Lane 13, 15: TSR8 ( $\cong$  16 TPG) [Positive Control]

Lane 14: Mere CHAPS buffer [Negative Control]

+ : non-denaturated probe

- : probe denaturated by heat

B

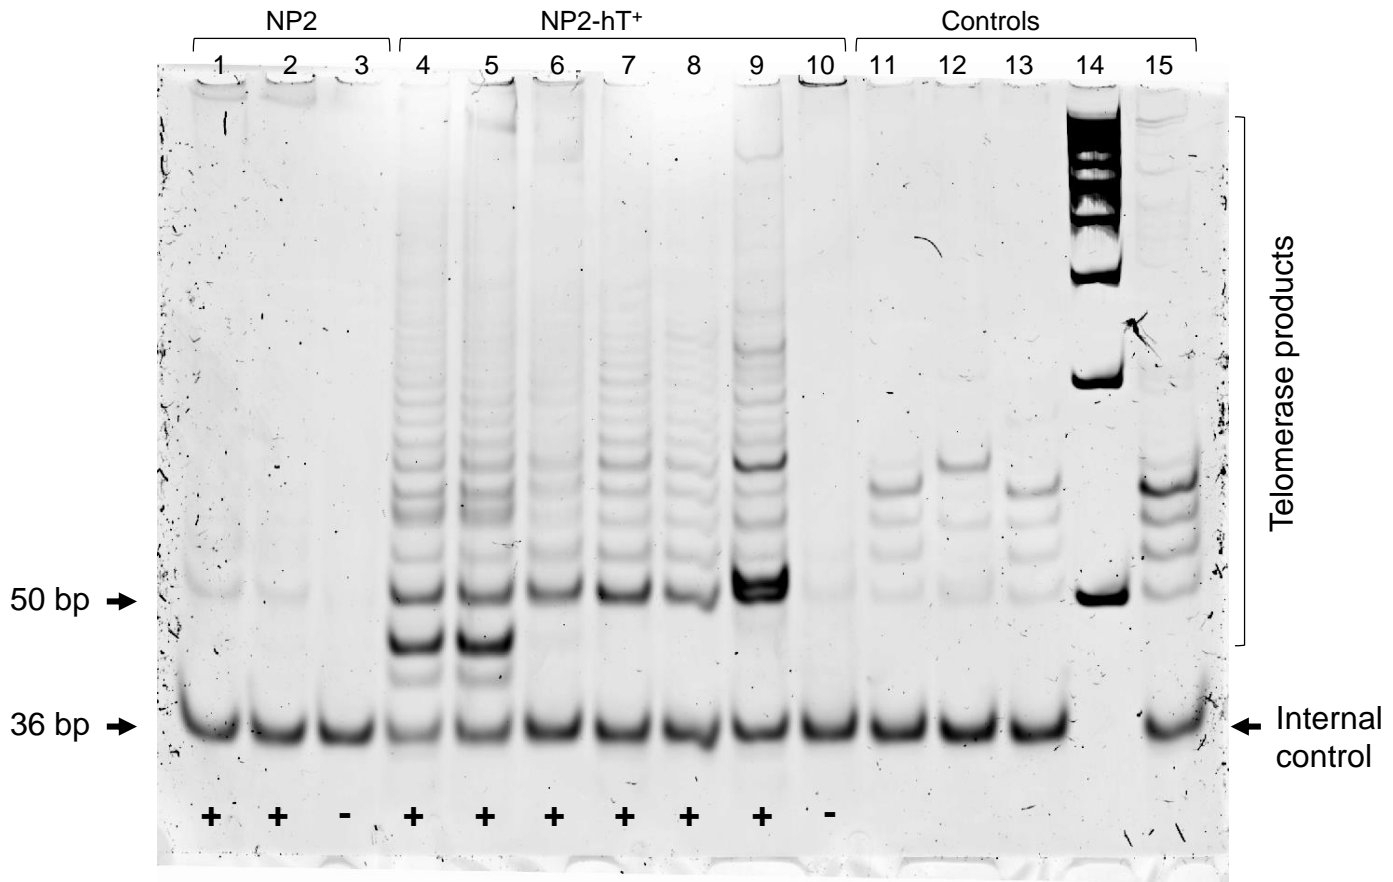

Lane 1-3: NP2 (NP2)

Lane 4, 5, 10: NP2-hT<sup>+</sup> (NP2-hT<sup>+</sup>)

Lane 6, 7: NP2-hT<sup>+</sup> (NP2-hT<sup>+</sup>) [1:5 dilution]

Lane 8, 9: NP2-hT<sup>+</sup> (NP2-hT<sup>+</sup>) [1:10 dilution]

Lane 11, 13: TSR8 ( $\triangleq$  16 TPG) [Positive Control]

Lane 12: Mere CHAPS buffer [Negative Control]

Lane 14: Marker (50 bp)

Lane 15: TSR8-D6 ( $\triangleq$  64 TPG) [Positive Control]

+ : non-denaturated probe

- : probe denaturated by heat
