# Supplementary material for: Primary and hTERT-Transduced Mesothelioma-Associated Fibroblasts but Not Primary or hTERT-Transduced Mesothelial Cells Stimulate Growth of Human Mesothelioma Cells
Source: Cells. 2023 Aug 5;12(15):2006. doi: 10.3390/cells12152006 (PMC10417280; doi:10.3390/cells12152006)
Supplement: Supplementary file 1 [file cells-12-02006-s001.zip › Cells-2524949-R1 - Supplementary Tables clean version.xlsx]

## Sheet: Supplementary Table S1
Supplementary Table S1: Ingredients of ACL cell growth medium
Ingredient	final concentration	Product No.	Company
Hepes	10 mM	H4034	Sigma-Aldrich, St. Louis, MO, USA
Pyruvat	0.5 mM	P2256	Sigma-Aldrich, St. Louis, MO, USA
Bovine serum albumin (BSA)	2 mg/ml	11403164	Fisher Scientific, Thermo Fisher Scientific, Carlsbad, CA, USA
Epidermal growth factor (EGF)	1 ng/ml	E9644	Sigma-Aldrich, St. Louis, MO, USA
Hydrocortison (HC)	50 nM	H2270	Sigma-Aldrich, St. Louis, MO, USA
Transferrin (TF)	10 µg/ml	T2036	Sigma-Aldrich, St. Louis, MO, USA
Phosphorylethanolamin (PETN)	10 µM	P0503	Sigma-Aldrich, St. Louis, MO, USA
Sodium Selenit (Se)	4.3 nM/ml	S5261	Sigma-Aldrich, St. Louis, MO, USA
Insulin (Ins)	20 µg/ml	91077C	Sigma-Aldrich, St. Louis, MO, USA
Triiodothyronine (T3)	100 pM	T6397	Sigma-Aldrich, St. Louis, MO, USA
Ethanolamine (ETN)	10 µM	E0135	Sigma-Aldrich, St. Louis, MO, USA

## Sheet: Supplementary Table S2
Supplementary Table S2: Data of all oligos from the identified annotated genes in whole genome gene expression microarrays of Meso-CAFs (Meso109F, Meso125F) and pleural mesothelial cells (Met5A, NP2)
Gene symbol	Gene description	[Meso109F](raw)	[Meso125F](raw)	[Met5A](raw)	[NP2](raw)	[Meso109F](normalized)	[Meso125F](normalized)	[Met5A](normalized)	[NP2](normalized)	ProbeName (Agilent)
A1BG	Homo sapiens alpha-1-B glycoprotein (A1BG), mRNA [NM_130786]	1564.83	782.274	2939.52	2900.13	0.955605	0.257288	0	0.0355253	A_23_P38816
A1BG	alpha-1-B glycoprotein [Source:HGNC Symbol;Acc:5] [ENST00000596924]	115.91	33.2704	113.064	82.4981	2.56299	1.06424	0.661941	0.26223	A_24_P151121
A1BG-AS1	Homo sapiens A1BG antisense RNA 1 (A1BG-AS1), long non-coding RNA [NR_015380]	396.026	365.986	1267.45	1452.6	0.577492	0.765634	0.390581	0.64228	A_24_P721699
A1CF	Homo sapiens APOBEC1 complementation factor (A1CF), transcript variant 5, mRNA [NM_001198819]	1.84492	2.01713	3.01408	3.86778	0.460079	0.89077	-0.69694	-0.28216	A_24_P570378
A1CF	Homo sapiens APOBEC1 complementation factor (A1CF), transcript variant 3, mRNA [NM_138933]	6.4867	6.28679	11.371	10.2999	0.240651	0.497437	-0.81473	-0.902468	A_23_P104224
A2M	Homo sapiens alpha-2-macroglobulin (A2M), mRNA [NM_000014]	7545.99	1868.42	9.87012	1751.62	8.83161	7.11966	-2.612	4.9144	A_23_P116898
A2ML1	Homo sapiens alpha-2-macroglobulin-like 1 (A2ML1), transcript variant 1, mRNA [NM_144670]	93.204	96.3043	368.537	318.668	0	0.349154	0.11817	-0.0365953	A_23_P372962
A3GALT2	Homo sapiens alpha 1,3-galactosyltransferase 2 (A3GALT2), mRNA [NM_001080438]	2.00632	1.72525	3.95296	4.33029	0.33889	0.423087	-0.54791	-0.36139	A_24_P16184
A4GALT	Homo sapiens alpha 1,4-galactosyltransferase (A4GALT), mRNA [NM_017436]	257.603	97.4171	630.409	953.422	0.935838	-0.165117	0.3618	1.01362	A_23_P57570
A4GNT	Homo sapiens alpha-1,4-N-acetylglucosaminyltransferase (A4GNT), mRNA [NM_016161]	2.08739	2.63336	3.7211	4.68995	0.138746	0.775898	-0.892404	-0.50357	A_23_P58046
AAAS	Homo sapiens achalasia, adrenocortical insufficiency, alacrimia (AAAS), transcript variant 1, mRNA [NM_015665]	1311.7	976.255	2458.87	1677.56	0.760498	0.636341	-0.198119	-0.694757	A_23_P64799
AACS	Homo sapiens acetoacetyl-CoA synthetase (AACS), mRNA [NM_023928]	782.626	589.493	5605.51	6653.1	-0.877785	-0.984687	0.0974884	0.399661	A_23_P204395
AADAC	Homo sapiens arylacetamide deacetylase (AADAC), mRNA [NM_001086]	12.1135	110.499	72.763	912.691	-0.866577	2.62471	-0.145166	3.55867	A_23_P80570
AADACL2	Homo sapiens arylacetamide deacetylase-like 2 (AADACL2), mRNA [NM_207365]	1.93183	1.71888	3.01605	3.88108	0.476962	0.61041	-0.745523	-0.326734	A_23_P91970
AADAT	Homo sapiens aminoadipate aminotransferase (AADAT), transcript variant 1, mRNA [NM_016228]	217.519	217.031	765.535	1252.52	0.845459	1.14417	0.795611	1.5609	A_23_P253484
AAED1	Homo sapiens AhpC/TSA antioxidant enzyme domain containing 1 (AAED1), mRNA [NM_153698]	356.193	165.032	1078.96	965.349	-0.246972	-1.05493	-0.513236	-0.618765	A_24_P169343
AAGAB	Homo sapiens alpha- and gamma-adaptin binding protein (AAGAB), transcript variant 1, mRNA [NM_024666]	8650.85	6536.49	15813.9	12650.2	0.495552	0.393172	-0.499342	-0.766388	A_23_P37545
AAK1	Homo sapiens AP2 associated kinase 1 (AAK1), mRNA [NM_014911]	4.13223	1.82105	41.305	28.9598	-0.0845547	-0.964757	1.37159	0.914316	A_23_P209826
AAK1	AP2 associated kinase 1 [Source:HGNC Symbol;Acc:19679] [ENST00000406297]	1.89851	1.71214	12.4759	3.87781	-0.386922	-0.23404	0.464104	-1.16673	A_24_P356
AAK1	Homo sapiens AP2 associated kinase 1 (AAK1), mRNA [NM_014911]	9.80191	8.93086	41.9109	55.0442	-0.231012	-0.0633297	0	0.448258	A_24_P299271
AAMDC	Homo sapiens adipogenesis associated, Mth938 domain containing (AAMDC), mRNA [NM_024684]	4991.97	2142.56	6387.67	7211.42	1.06578	0.147453	-0.443716	-0.213732	A_24_P49383
AAMP	Homo sapiens angio-associated, migratory cell protein (AAMP), mRNA [NM_001087]	2688.06	2635.53	10173.4	9449.15	-0.383643	-0.110166	-0.328657	-0.380209	A_23_P56529
AANAT	Homo sapiens aralkylamine N-acetyltransferase (AANAT), transcript variant 2, mRNA [NM_001088]	24.0324	15.8422	187.251	189.679	-0.533337	-0.832593	0.563407	0.636988	A_23_P152527
AAR2	Homo sapiens AAR2 splicing factor homolog (S. cerevisiae) (AAR2), transcript variant 1, mRNA [NM_015511]	909.125	515.649	5195.49	3369.95	-0.269122	-0.785266	0.380409	-0.189134	A_23_P166196
AARD	Homo sapiens alanine and arginine rich domain containing protein (AARD), mRNA [NM_001025357]	229.149	26.7488	1550.48	135.895	2.79679	0	3.68998	0.232813	A_32_P181527
AARS	Homo sapiens alanyl-tRNA synthetase (AARS), mRNA [NM_001605]	1654.36	1445.59	6569.39	2763.04	0.147318	0.254651	0.271631	-0.922879	A_24_P172990
AARS2	Homo sapiens alanyl-tRNA synthetase 2, mitochondrial (AARS2), mRNA [NM_020745]	1522.18	826.429	3274.08	3068.06	0.282374	-0.296852	-0.47785	-0.51662	A_23_P383688
AASDH	Homo sapiens aminoadipate-semialdehyde dehydrogenase (AASDH), transcript variant 1, mRNA [NM_181806]	229.708	107.241	460.47	430.529	0.903881	0.106878	0.0420055	0	A_24_P307195
AASDH	aminoadipate-semialdehyde dehydrogenase [Source:HGNC Symbol;Acc:23993] [ENST00000510012]	2.21121	1.98379	3.66179	4.33995	0.371079	0.516455	-0.766381	-0.466264	A_23_P396086
AASDH	Homo sapiens aminoadipate-semialdehyde dehydrogenase (AASDH), transcript variant 1, mRNA [NM_181806]	86.3596	50.5192	368.951	407.051	0.104148	-0.36743	0.33397	0.530743	A_24_P383076
AASDHPPT	Homo sapiens aminoadipate-semialdehyde dehydrogenase-phosphopantetheinyl transferase (AASDHPPT), mRNA [NM_015423]	3865.98	3592.65	10102.4	7498.33	0.498534	0.694694	0.0191517	-0.355919	A_24_P295620
AASDHPPT	Homo sapiens aminoadipate-semialdehyde dehydrogenase-phosphopantetheinyl transferase (AASDHPPT), mRNA [NM_015423]	3614.64	2657.46	7478.32	5291.27	0.641995	0.500134	-0.174322	-0.618433	A_23_P202988
AASDHPPT	Homo sapiens aminoadipate-semialdehyde dehydrogenase-phosphopantetheinyl transferase (AASDHPPT), mRNA [NM_015423]	1179	684.456	4523.32	2251.78	0	-0.482593	0.0746345	-0.876687	A_24_P184230
AASS	Homo sapiens aminoadipate-semialdehyde synthase (AASS), mRNA [NM_005763]	200.864	66.422	906.909	481.569	0.415376	-0.879162	0.724937	-0.133286	A_23_P8754
AATF	Homo sapiens apoptosis antagonizing transcription factor (AATF), mRNA [NM_012138]	4280.84	3136.46	8379.85	8704.68	-0.308302	-0.455112	-1.20445	-1.09459	A_23_P89460
AATF	Homo sapiens apoptosis antagonizing transcription factor (AATF), mRNA [NM_012138]	2598.96	1778.49	8283.47	8660.13	-0.72188	-0.967221	-0.91476	-0.795614	A_24_P262395
AATK	Homo sapiens apoptosis-associated tyrosine kinase (AATK), transcript variant 1, mRNA [NM_001080395]	80.5181	40.5495	1169.07	233.453	0.50812	-0.179563	2.50284	0.23368	A_23_P10559
AATK	Homo sapiens apoptosis-associated tyrosine kinase (AATK), transcript variant 1, mRNA [NM_001080395]	3.37809	1.92606	163.416	80.2762	-2.07374	-2.58235	1.65728	0.686764	A_23_P159172
AATK	Homo sapiens apoptosis-associated tyrosine kinase (AATK), transcript variant 1, mRNA [NM_001080395]	15.4282	3.95526	168.441	55.6919	0.875347	-0.786434	2.45877	0.917057	A_23_P159169
ABAT	Homo sapiens 4-aminobutyrate aminotransferase (ABAT), transcript variant 2, mRNA [NM_000663]	1017.56	258.781	657.736	1938.25	2.72682	1.05346	0.232113	1.84628	A_23_P152505
ABAT	Homo sapiens 4-aminobutyrate aminotransferase (ABAT), transcript variant 2, mRNA [NM_000663]	107.407	11.1386	82.1817	154.203	2.56098	-0.406521	0.309602	1.27253	A_24_P330684
ABCA1	Homo sapiens ATP-binding cassette, sub-family A (ABC1), member 1 (ABCA1), mRNA [NM_005502]	2939.93	1734.28	1135.46	9012.24	2.03723	1.57773	-1.20045	1.84315	A_24_P235429
ABCA1	ATP-binding cassette, sub-family A (ABC1), member 1 [Source:HGNC Symbol;Acc:29] [ENST00000423487]	17.9659	2.2173	20.3584	37.7012	1.44975	-1.26669	-0.235063	0.708914	A_24_P289265
ABCA1	Homo sapiens ATP-binding cassette, sub-family A (ABC1), member 1 (ABCA1), mRNA [NM_005502]	114.303	55.8028	34.6784	203.388	2.50708	1.77458	-1.07885	1.52827	A_23_P216649
ABCA10	Homo sapiens ATP-binding cassette, sub-family A (ABC1), member 10 (ABCA10), mRNA [NM_080282]	2.32077	1.79082	56.782	93.2251	-1.57715	-1.64918	1.17043	1.94071	A_23_P89422
ABCA11P	Homo sapiens ATP-binding cassette, sub-family A (ABC1), member 11, pseudogene (ABCA11P), non-coding RNA [NR_002451]	62.014	33.1362	229.508	322.994	-0.0701084	-0.672346	-0.0474062	0.500548	A_23_P92602
ABCA12	Homo sapiens ATP-binding cassette, sub-family A (ABC1), member 12 (ABCA12), transcript variant 1, mRNA [NM_173076]	1.82676	1.65404	3.67843	18.7643	-0.654453	-0.495802	-1.50983	0.895991	A_23_P56369
ABCA13	Homo sapiens ATP-binding cassette, sub-family A (ABC1), member 13 (ABCA13), mRNA [NM_152701]	7.0848	14.5762	3.03175	61.3733	0.49381	1.83658	-2.59594	1.79844	A_23_P364324
ABCA17P	ATP-binding cassette, sub-family A (ABC1), member 17, pseudogene [Source:HGNC Symbol;Acc:32972] [ENST00000512848]	16.8249	15.1292	936.78	91.6538	-1.7778	-1.62911	2.15607	-1.14239	A_32_P29703
ABCA2	Homo sapiens ATP-binding cassette, sub-family A (ABC1), member 2 (ABCA2), transcript variant 1, mRNA [NM_001606]	55.7576	88.9738	459.187	253.363	-0.0701261	0.906034	1.10654	0.303653	A_23_P43504
ABCA3	Homo sapiens ATP-binding cassette, sub-family A (ABC1), member 3 (ABCA3), mRNA [NM_001089]	146.913	80.019	11563.5	240.98	-2.20635	-2.78096	2.22694	-3.30259	A_23_P140876
ABCA4	Homo sapiens ATP-binding cassette, sub-family A (ABC1), member 4 (ABCA4), mRNA [NM_000350]	8.94221	1.63826	8.15679	10.8845	1.10167	-1.04485	-0.896139	-0.424952	A_23_P160940
ABCA5	Homo sapiens ATP-binding cassette, sub-family A (ABC1), member 5 (ABCA5), transcript variant 1, mRNA [NM_018672]	138.28	88.9111	485.456	1138.26	-1.43876	-1.77397	-1.49219	-0.207781	A_23_P78018
ABCA5	Homo sapiens ATP-binding cassette, sub-family A (ABC1), member 5 (ABCA5), transcript variant 1, mRNA [NM_018672]	63.8208	35.1152	177.292	318.062	-0.635034	-1.19502	-1.02618	-0.128012	A_24_P67096
ABCA6	ATP-binding cassette, sub-family A (ABC1), member 6 [Source:HGNC Symbol;Acc:36] [ENST00000590645]	66.0064	66.9417	8.90349	630.421	1.72466	2.0469	-3.03068	3.17011	A_24_P378581
ABCA6	Homo sapiens ATP-binding cassette, sub-family A (ABC1), member 6 (ABCA6), mRNA [NM_080284]	120.594	184.59	9.23965	1870.31	2.25948	3.1756	-3.31187	4.40435	A_23_P500400
ABCA7	Homo sapiens ATP-binding cassette, sub-family A (ABC1), member 7 (ABCA7), mRNA [NM_019112]	37.4192	77.0395	509.15	227.737	-1.69635	-0.352586	0.204711	-0.901023	A_23_P39481
ABCA8	Homo sapiens ATP-binding cassette, sub-family A (ABC1), member 8 (ABCA8), transcript variant 2, mRNA [NM_007168]	161.637	143.865	44.0343	549.662	5.83593	5.96983	2.09469	5.79153	A_23_P118615
ABCA9	Homo sapiens ATP-binding cassette, sub-family A (ABC1), member 9 (ABCA9), mRNA [NM_080283]	2.01965	1.89313	4.78034	247.922	-0.193794	0.0148172	-0.815968	4.93566	A_24_P241672
ABCA9	ATP-binding cassette, sub-family A (ABC1), member 9 [Source:HGNC Symbol;Acc:39] [ENST00000340001]	1.89816	1.74336	3.32012	349.761	0	0.179216	-1.05855	5.71544	A_24_P399341
ABCB1	Homo sapiens ATP-binding cassette, sub-family B (MDR/TAP), member 1 (ABCB1), mRNA [NM_000927]	6.8355	9.97135	21.1682	53.3515	-0.0378971	0.808792	-0.272295	1.11633	A_23_P82523
ABCB10	Homo sapiens ATP-binding cassette, sub-family B (MDR/TAP), member 10 (ABCB10), mRNA [NM_012089]	7.72158	6.69841	158.37	92.3382	-1.51383	-1.41696	0.979248	0.255941	A_24_P324449
ABCB10	Homo sapiens ATP-binding cassette, sub-family B (MDR/TAP), member 10 (ABCB10), mRNA [NM_012089]	16.7226	10.4306	447.469	304.658	-1.40408	-1.7831	1.47266	0.97306	A_32_P23624
ABCB10	Homo sapiens ATP-binding cassette, sub-family B (MDR/TAP), member 10 (ABCB10), mRNA [NM_012089]	56.7328	32.4049	325.36	184.27	-0.170986	-0.677011	0.483617	-0.281603	A_24_P274073
ABCB10	Homo sapiens ATP-binding cassette, sub-family B (MDR/TAP), member 10 (ABCB10), mRNA [NM_012089]	148.24	96.1652	2361.1	1732.63	-1.61143	-1.93384	0.51684	0.125337	A_23_P201918
ABCB11	Homo sapiens ATP-binding cassette, sub-family B (MDR/TAP), member 11 (ABCB11), mRNA [NM_003742]	2.00928	1.76417	3.47436	4.29144	0.310872	0.425126	-0.764235	-0.404533	A_23_P39703
ABCB4	Homo sapiens ATP-binding cassette, sub-family B (MDR/TAP), member 4 (ABCB4), transcript variant C, mRNA [NM_018850]	1.88831	1.70074	3.05968	14.7152	0.140347	0.291355	-1.02855	1.2923	A_23_P123112
ABCB5	Homo sapiens ATP-binding cassette, sub-family B (MDR/TAP), member 5 (ABCB5), transcript variant 2, mRNA [NM_178559]	3.66515	1.8053	3.51891	4.16443	1.0142	0.294506	-0.909726	-0.611745	A_23_P111662
ABCB6	Homo sapiens ATP-binding cassette, sub-family B (MDR/TAP), member 6 (ABCB6), mRNA [NM_005689]	549.84	442.136	2658.12	1920.92	-0.408145	-0.42072	0	-0.41362	A_24_P197196
ABCB6	Homo sapiens ATP-binding cassette, sub-family B (MDR/TAP), member 6 (ABCB6), mRNA [NM_005689]	539.712	463.938	7871.88	6246.62	-1.93531	-1.85162	0.0659637	-0.212678	A_23_P5441
ABCB7	Homo sapiens ATP-binding cassette, sub-family B (MDR/TAP), member 7 (ABCB7), transcript variant 1, mRNA [NM_004299]	613.026	497.517	2750.66	1656.76	-0.672085	-0.671342	-0.371503	-1.04793	A_23_P171258
ABCB8	Homo sapiens ATP-binding cassette, sub-family B (MDR/TAP), member 8 (ABCB8), transcript variant 2, mRNA [NM_007188]	30.9558	25.0578	173.741	198.487	-0.958802	-0.961807	-0.33532	-0.0882292	A_23_P82249
ABCB9	Homo sapiens ATP-binding cassette, sub-family B (MDR/TAP), member 9 (ABCB9), transcript variant 1, mRNA [NM_019625]	66.8708	35.0812	157.981	130.485	1.01116	0.382425	0.38628	0.1654	A_23_P128094
ABCB9	Homo sapiens ATP-binding cassette, sub-family B (MDR/TAP), member 9 (ABCB9), transcript variant 1, mRNA [NM_019625]	9.20762	1.83678	78.1448	52.4723	-0.597576	-2.62128	0.622496	0.102892	A_24_P312895
ABCC1	Homo sapiens ATP-binding cassette, sub-family C (CFTR/MRP), member 1 (ABCC1), mRNA [NM_004996]	784.964	725.273	1537.52	1159.76	0.983547	1.17139	0.0882769	-0.263514	A_24_P227831
ABCC10	Homo sapiens ATP-binding cassette, sub-family C (CFTR/MRP), member 10 (ABCC10), transcript variant MRP7A, mRNA [NM_033450]	267.061	399.748	685.185	1550.12	0.027215	0.911081	-0.478639	0.754168	A_23_P219013
ABCC11	Homo sapiens ATP-binding cassette, sub-family C (CFTR/MRP), member 11 (ABCC11), transcript variant 2, mRNA [NM_033151]	2.11983	1.83952	6.05407	16.1981	0.351224	0.448547	0	1.47484	A_23_P141076
ABCC12	Homo sapiens ATP-binding cassette, sub-family C (CFTR/MRP), member 12 (ABCC12), mRNA [NM_033226]	1.99726	1.75865	3.49154	4.29858	0.334895	0.453285	-0.724441	-0.369456	A_24_P287766
ABCC13	Homo sapiens ATP-binding cassette, sub-family C (CFTR/MRP), member 13, pseudogene (ABCC13), transcript variant A, non-coding RNA [NR_003087]	2.07197	2.27691	4.14667	5.51082	-0.438019	0	-1.30225	-0.836942	A_23_P166207
ABCC13	Homo sapiens ATP-binding cassette, sub-family C (CFTR/MRP), member 13, pseudogene (ABCC13), transcript variant A, non-coding RNA [NR_003087]	1.92261	3.37938	3.38228	3.91992	0.267968	1.38361	-0.782275	-0.514458	A_23_P307570
ABCC13	Homo sapiens ATP-binding cassette, sub-family C (CFTR/MRP), member 13, pseudogene (ABCC13), transcript variant D, non-coding RNA [NR_003088]	2.03894	1.79443	3.06347	3.91249	0.43778	0.555433	-0.840045	-0.432137	A_23_P397480
ABCC2	Homo sapiens ATP-binding cassette, sub-family C (CFTR/MRP), member 2 (ABCC2), mRNA [NM_000392]	8.85612	6.44898	56.1236	108.071	-1.20204	-1.3577	-0.40336	0.596931	A_23_P44569
ABCC2	Homo sapiens ATP-binding cassette, sub-family C (CFTR/MRP), member 2 (ABCC2), mRNA [NM_000392]	8.44779	6.1394	44.6286	109.864	-1.47881	-1.63734	-0.942667	0.412005	A_23_P158976
ABCC3	Homo sapiens ATP-binding cassette, sub-family C (CFTR/MRP), member 3 (ABCC3), transcript variant 1, mRNA [NM_003786]	389.843	203.117	347.303	623.345	-0.0896645	-0.728299	-2.12154	-1.22271	A_23_P207507
ABCC4	Homo sapiens ATP-binding cassette, sub-family C (CFTR/MRP), member 4 (ABCC4), transcript variant 1, mRNA [NM_005845]	5.90832	4.99649	21.1398	6.04417	1.47925	1.53937	1.45322	-0.298135	A_24_P222291
ABCC4	Homo sapiens ATP-binding cassette, sub-family C (CFTR/MRP), member 4 (ABCC4), transcript variant 1, mRNA [NM_005845]	166.509	114.523	225.998	100.629	1.87363	1.63562	0.449164	-0.663101	A_24_P16913
ABCC4	Homo sapiens ATP-binding cassette, sub-family C (CFTR/MRP), member 4 (ABCC4), transcript variant 1, mRNA [NM_005845]	20.8866	25.1885	153.769	123.537	0.179438	0.751568	1.19437	0.933547	A_23_P25559
ABCC5	Homo sapiens ATP-binding cassette, sub-family C (CFTR/MRP), member 5 (ABCC5), transcript variant 1, mRNA [NM_005688]	474.863	408.198	3726.65	4192.88	-1.44878	-1.36508	-0.341665	-0.116611	A_23_P258221
ABCC5	Homo sapiens ATP-binding cassette, sub-family C (CFTR/MRP), member 5 (ABCC5), transcript variant 1, mRNA [NM_005688]	37.2255	58.8731	299.681	326.013	-0.93011	0.0331535	0.213779	0.390271	A_23_P212665
ABCC6	Homo sapiens ATP-binding cassette, sub-family C (CFTR/MRP), member 6 (ABCC6), transcript variant 2, mRNA [NM_001079528]	177.311	68.8932	554.881	125.367	2.01831	0.956411	1.79903	-0.292004	A_23_P15272
ABCC6	Homo sapiens ATP-binding cassette, sub-family C (CFTR/MRP), member 6 (ABCC6), transcript variant 1, mRNA [NM_001171]	31.5849	11.9483	268.485	28.2793	1.62192	0.521437	2.84428	-0.347753	A_23_P100539
ABCC6	Homo sapiens ATP-binding cassette, sub-family C (CFTR/MRP), member 6 (ABCC6), transcript variant 1, mRNA [NM_001171]	11.9707	9.14506	57.2138	17.5802	0.666265	0.579771	1.05795	-0.589471	A_23_P366828
ABCC8	Homo sapiens ATP-binding cassette, sub-family C (CFTR/MRP), member 8 (ABCC8), transcript variant 2, mRNA [NM_000352]	2.04688	3.05058	16.3971	14.9298	-1.13676	-0.259161	0	-0.0802522	A_23_P24774
ABCC9	Homo sapiens ATP-binding cassette, sub-family C (CFTR/MRP), member 9 (ABCC9), transcript variant SUR2A, mRNA [NM_005691]	48.8959	11.5769	3.69167	95.2806	4.07275	2.29622	-1.5198	3.22503	A_24_P178503
ABCC9	Homo sapiens ATP-binding cassette, sub-family C (CFTR/MRP), member 9 (ABCC9), transcript variant SUR2B, mRNA [NM_020297]	100.376	19.4621	10.6062	251.845	5.09581	3.03109	-0.011796	4.61274	A_23_P204194
ABCC9	Homo sapiens ATP-binding cassette, sub-family C (CFTR/MRP), member 9 (ABCC9), transcript variant SUR2A, mRNA [NM_005691]	19.3758	1.8386	3.34083	104.287	3.23053	0.134899	-1.17062	3.84858	A_23_P368691
ABCD1	Homo sapiens ATP-binding cassette, sub-family D (ALD), member 1 (ABCD1), mRNA [NM_000033]	498.026	394.029	521.742	290.936	1.96407	1.9281	0.166009	-0.621636	A_23_P148556
ABCD2	Homo sapiens ATP-binding cassette, sub-family D (ALD), member 2 (ABCD2), mRNA [NM_005164]	2.64579	11.3798	4.22119	13.233	0.250897	2.65755	-0.940328	0.763078	A_23_P388124
ABCD3	Homo sapiens ATP-binding cassette, sub-family D (ALD), member 3 (ABCD3), transcript variant 1, mRNA [NM_002858]	104.085	22.4785	181.703	37.9995	1.39489	-0.514306	0.333534	-1.869	A_24_P221154
ABCD3	Homo sapiens ATP-binding cassette, sub-family D (ALD), member 3 (ABCD3), transcript variant 1, mRNA [NM_002858]	706.945	425.918	1589.47	1417.61	1.10052	0.671441	0.404213	0.294124	A_23_P74794
ABCD4	Homo sapiens ATP-binding cassette, sub-family D (ALD), member 4 (ABCD4), transcript variant 1, mRNA [NM_005050]	532.418	450.644	1943.68	2627.98	0	0.0613775	0.002985	0.493138	A_23_P37327
ABCE1	Homo sapiens ATP-binding cassette, sub-family E (OABP), member 1 (ABCE1), transcript variant 1, mRNA [NM_002940]	543.799	431.54	4157.07	2549.36	-0.448278	-0.47991	0.620966	-0.0294724	A_23_P41380
ABCE1	Homo sapiens ATP-binding cassette, sub-family E (OABP), member 1 (ABCE1), transcript variant 1, mRNA [NM_002940]	214.143	93.6862	2180.47	1815.19	-0.792022	-1.68274	0.690793	0.481263	A_32_P108474
ABCF1	Homo sapiens ATP-binding cassette, sub-family F (GCN20), member 1 (ABCF1), transcript variant 1, mRNA [NM_001025091]	5532.24	5620.54	8406.22	11580.9	0.170241	0.495031	-1.09134	-0.574138	A_23_P251660
ABCF2	Homo sapiens ATP-binding cassette, sub-family F (GCN20), member 2 (ABCF2), transcript variant 2, mRNA [NM_005692]	2065.75	1861.28	7719.68	5892.62	0.0324812	0.184053	0.0691767	-0.265463	A_23_P215175
ABCF2	Homo sapiens ATP-binding cassette, sub-family F (GCN20), member 2 (ABCF2), transcript variant 1, mRNA [NM_007189]	492.629	297.002	2261.34	1290.06	0.454495	0.026413	0.787923	0.0331726	A_24_P380629
ABCF3	Homo sapiens ATP-binding cassette, sub-family F (GCN20), member 3 (ABCF3), mRNA [NM_018358]	3411.99	2526.25	5713.06	6560.29	0.697396	0.565731	-0.424129	-0.169642	A_24_P251688
ABCG1	Homo sapiens ATP-binding cassette, sub-family G (WHITE), member 1 (ABCG1), transcript variant 5, mRNA [NM_207627]	70.4551	2.35217	30.4364	41.523	2.36674	-2.23595	-0.709348	-0.206244	A_23_P166297
ABCG1	Homo sapiens EST from clone 208499, full insert. [AL355688]	21.1134	1.68207	19.2616	5.06758	2.17829	-1.16962	0.180677	-1.69069	A_32_P147063
ABCG1	Homo sapiens full length insert cDNA clone ZE12B03. [AF086547]	23.645	1.8341	3.86059	4.59867	3.38644	0	-1.09338	-0.785989	A_32_P203749
ABCG2	Homo sapiens ATP-binding cassette, sub-family G (WHITE), member 2 (ABCG2), transcript variant 1, mRNA [NM_004827]	705.561	372.445	1563.42	1751.38	0.870425	0.250627	0.153111	0.37189	A_23_P18713
ABCG4	Homo sapiens ATP-binding cassette, sub-family G (WHITE), member 4 (ABCG4), transcript variant 1, mRNA [NM_022169]	93.3344	54.3644	401.363	60.7074	2.67191	2.19411	2.91116	0.241189	A_24_P355626
ABCG5	Homo sapiens ATP-binding cassette, sub-family G (WHITE), member 5 (ABCG5), mRNA [NM_022436]	5.88394	3.5221	13.1339	15.8562	0.763745	0.325344	0.0570121	0.383748	A_23_P119763
ABCG8	Homo sapiens ATP-binding cassette, sub-family G (WHITE), member 8 (ABCG8), mRNA [NM_022437]	5.32984	1.81019	3.43184	4.31311	1.91466	0.658657	-0.585628	-0.200889	A_23_P90577
ABHD1	Homo sapiens abhydrolase domain containing 1 (ABHD1), mRNA [NM_032604]	30.5868	18.1922	23.9891	55.0616	0.682185	0.234544	-1.53352	-0.279863	A_23_P17242
ABHD1	Homo sapiens abhydrolase domain containing 1, mRNA (cDNA clone IMAGE:4812401), with apparent retained intron. [BC028378]	4.78679	5.84201	7.79236	7.14709	0.741153	1.33051	-0.421023	-0.490735	A_24_P918739
ABHD10	Homo sapiens abhydrolase domain containing 10 (ABHD10), transcript variant 1, mRNA [NM_018394]	45.961	26.369	501.059	343.787	-1.21944	-1.71906	0.361881	-0.126596	A_24_P308590
ABHD10	Homo sapiens abhydrolase domain containing 10 (ABHD10), transcript variant 1, mRNA [NM_018394]	3.2972	1.96442	3.41726	3.88079	1.11766	0.672473	-0.695919	-0.457417	A_24_P268662
ABHD10	Homo sapiens abhydrolase domain containing 10 (ABHD10), transcript variant 1, mRNA [NM_018394]	1307.56	1026.02	3296.43	3225.98	0.0594025	0.0115242	-0.471751	-0.447927	A_23_P92213
ABHD11	Homo sapiens abhydrolase domain containing 11 (ABHD11), transcript variant 1, mRNA [NM_148912]	2754.09	1796.18	10147.3	4327.05	0.256854	-0.0578451	0.273121	-0.901526	A_23_P315933
ABHD11	Homo sapiens abhydrolase domain containing 11 (ABHD11), transcript variant 1, mRNA [NM_148912]	196.368	114.737	2043.31	487.578	-0.488361	-0.961644	1.02574	-0.986476	A_23_P8558
ABHD11	Homo sapiens abhydrolase domain containing 11 (ABHD11), transcript variant 8, mRNA [NM_001145364]	420.365	265.36	1829.1	647.294	0.517784	0.15604	0.774026	-0.669621	A_23_P362712
ABHD12	Homo sapiens abhydrolase domain containing 12 (ABHD12), transcript variant 2, mRNA [NM_015600]	1213.84	868.693	5423.02	3135.1	0.393237	0.212525	0.68758	-0.0480146	A_23_P149494
ABHD12	Homo sapiens abhydrolase domain containing 12 (ABHD12), transcript variant 2, mRNA [NM_015600]	1726.4	828.555	10328.9	5545.23	0.257159	-0.499996	0.972824	0.13045	A_23_P367026
ABHD12B	Homo sapiens abhydrolase domain containing 12B (ABHD12B), transcript variant 1, mRNA [NM_001206673]	2.55397	1.77329	3.51393	4.20235	0.558159	0.333792	-0.846673	-0.533573	A_23_P366035
ABHD13	Homo sapiens abhydrolase domain containing 13 (ABHD13), mRNA [NM_032859]	402.058	367.528	1029.25	1204.01	0.692355	0.864753	0.18329	0.46454	A_23_P205027
ABHD13	Homo sapiens abhydrolase domain containing 13 (ABHD13), mRNA [NM_032859]	29.267	27.6198	114.742	92.9947	0.455565	0.673938	0.561434	0.313252	A_24_P61464
ABHD13	Homo sapiens abhydrolase domain containing 13 (ABHD13), mRNA [NM_032859]	17.2857	12.7278	114.97	65.2324	0.829589	0.689948	1.69802	0.935415	A_24_P398691
ABHD14A	Homo sapiens abhydrolase domain containing 14A (ABHD14A), mRNA [NM_015407]	662.737	700.456	1185.34	1435.09	0.889664	1.27147	-0.136719	0.194115	A_23_P69267
ABHD14B	Homo sapiens abhydrolase domain containing 14B (ABHD14B), transcript variant 1, mRNA [NM_032750]	609.882	492.57	1087.14	2156.95	0.388141	0.381887	-0.643101	0.400345	A_23_P155417
ABHD14B	Homo sapiens abhydrolase domain containing 14B (ABHD14B), transcript variant 1, mRNA [NM_032750]	105.079	93.7091	176.062	342.123	0.593884	0.730623	-0.526679	0.486742	A_24_P337140
ABHD15	Homo sapiens abhydrolase domain containing 15 (ABHD15), mRNA [NM_198147]	166.406	121.313	396.709	468.461	0.101003	-0.0530295	-0.510803	-0.215963	A_23_P363034
ABHD16A	Homo sapiens abhydrolase domain containing 16A (ABHD16A), transcript variant 1, mRNA [NM_021160]	344.951	352.513	455.235	1079.07	0.0495768	0.382809	-1.41538	-0.115286	A_23_P156697
ABHD16B	Homo sapiens abhydrolase domain containing 16B (ABHD16B), mRNA [NM_080622]	7.54217	3.21728	161.527	118.237	-1.37967	-2.30686	1.1758	0.780701	A_32_P465065
ABHD17A	Homo sapiens abhydrolase domain containing 17A (ABHD17A), transcript variant 1, mRNA [NM_031213]	2203.29	1635.42	2514.27	2191.7	1.10618	0.978127	-0.568516	-0.711615	A_23_P165078
ABHD17A	Homo sapiens abhydrolase domain containing 17A (ABHD17A), transcript variant 1, mRNA [NM_031213]	1680.51	1185.58	3870.11	3308.89	0.587089	0.385728	-0.0746136	-0.245649	A_32_P68335
ABHD17A	Homo sapiens abhydrolase domain containing 17A (ABHD17A), transcript variant 1, mRNA [NM_031213]	2615.41	1971	8990.26	8232.17	0.106168	0	0.0223131	-0.0497856	A_24_P324563
ABHD17A	Homo sapiens abhydrolase domain containing 17A (ABHD17A), transcript variant 1, mRNA [NM_031213]	9317.31	5925.95	16179.5	15345.8	0.896385	0.545465	-0.172606	-0.193946	A_24_P187583
ABHD17A	Homo sapiens abhydrolase domain containing 17A (ABHD17A), transcript variant 1, mRNA [NM_031213]	4279.1	2505.39	12934.2	12986.9	0.372456	-0.0978727	0.103085	0.163947	A_23_P5075
ABHD17B	Homo sapiens abhydrolase domain containing 17B (ABHD17B), transcript variant 1, mRNA [NM_016014]	9.34835	4.45468	164.161	118.669	-1.39283	-2.16027	0.876252	0.463068	A_23_P83149
ABHD17C	Homo sapiens abhydrolase domain containing 17C (ABHD17C), mRNA [NM_021214]	10918.4	4533.59	9760.66	6563.75	1.05249	0.0864048	-0.974396	-1.49186	A_32_P39093
ABHD17C	Homo sapiens abhydrolase domain containing 17C (ABHD17C), mRNA [NM_021214]	1069.99	454.474	838.539	569.598	1.54224	0.608856	-0.674586	-1.17753	A_23_P369701
ABHD2	Homo sapiens abhydrolase domain containing 2 (ABHD2), transcript variant 1, mRNA [NM_007011]	23.6686	106.682	179.949	228.346	-0.606803	1.86741	0.45456	0.853188	A_24_P142141
ABHD2	Homo sapiens abhydrolase domain containing 2 (ABHD2), transcript variant 1, mRNA [NM_007011]	127.775	103.514	101.784	238.868	1.82305	1.82121	-0.370223	0.915468	A_24_P924915
ABHD2	Homo sapiens abhydrolase domain containing 2 (ABHD2), transcript variant 1, mRNA [NM_007011]	225.484	598.061	1096.02	1987.8	0	1.70921	0.415999	1.32988	A_23_P395172
ABHD2	Homo sapiens abhydrolase domain containing 2 (ABHD2), transcript variant 1, mRNA [NM_007011]	2.24752	1.91724	3.34165	4.14327	0.215425	0.288069	-1.07753	-0.712325	A_24_P924920
ABHD2	Homo sapiens abhydrolase domain containing 2 (ABHD2), transcript variant 1, mRNA [NM_007011]	213.899	261.641	431.848	674.972	0.603306	1.19591	-0.248279	0.451017	A_23_P140591
ABHD3	Homo sapiens abhydrolase domain containing 3 (ABHD3), mRNA [NM_138340]	117.099	66.7023	1473.86	280.102	-1.2844	-1.79437	0.504228	-1.83636	A_23_P305759
ABHD4	Homo sapiens abhydrolase domain containing 4 (ABHD4), mRNA [NM_022060]	1875.15	863.968	2537.5	2880.94	0.899423	0.0834131	-0.52935	-0.291231	A_23_P205519
ABHD5	Homo sapiens abhydrolase domain containing 5 (ABHD5), mRNA [NM_016006]	3281.82	1557.61	3392.33	6401.73	1.56398	0.790759	-0.253419	0.717758	A_23_P250294
ABHD6	Homo sapiens abhydrolase domain containing 6 (ABHD6), mRNA [NM_020676]	853.096	953.201	3637.56	2704.85	0.347898	0.809917	0.574909	0.202479	A_23_P211850
ABHD8	Homo sapiens abhydrolase domain containing 8 (ABHD8), mRNA [NM_024527]	225.182	204.595	735.513	428.15	0.255708	0.419335	0.0981874	-0.627456	A_23_P50857
ABI1	Homo sapiens abl-interactor 1 (ABI1), transcript variant 1, mRNA [NM_005470]	136.612	137.006	1189.73	1287.34	-0.735687	-0.429592	0.521609	0.690361	A_24_P149844
ABI1	Homo sapiens abl-interactor 1 (ABI1), transcript variant 1, mRNA [NM_005470]	3001.32	2542.41	7542.39	8285.54	0.345186	0.407731	-0.190564	0	A_23_P126992
ABI2	Homo sapiens abl-interactor 2 (ABI2), transcript variant 3, mRNA [NM_005759]	2941.76	1810.39	7074.2	5333.59	0.185439	-0.212994	-0.41385	-0.766319	A_23_P79692
ABI2	Homo sapiens abl-interactor 2 (ABI2), transcript variant 3, mRNA [NM_005759]	198.031	276.167	2003.54	650.938	-0.931558	-0.149793	0.542019	-1.02495	A_24_P933418
ABI3	Homo sapiens ABI family, member 3 (ABI3), transcript variant 1, mRNA [NM_016428]	14.3479	7.36764	47.6978	50.5914	0.0160694	-0.643546	-0.116022	0.0239372	A_23_P141429
ABI3BP	Homo sapiens ABI family, member 3 (NESH) binding protein (ABI3BP), mRNA [NM_015429]	71.3305	83.3662	49.5076	15411.1	-1.03772	-0.510829	-3.42976	4.90733	A_23_P218858
ABI3BP	ABI family, member 3 (NESH) binding protein [Source:HGNC Symbol;Acc:17265] [ENST00000475896]	1.90042	1.83846	3.71845	101.508	-1.50339	-1.24927	-2.40019	2.42555	A_23_P354308
ABL1	Homo sapiens c-abl oncogene 1, non-receptor tyrosine kinase (ABL1), transcript variant a, mRNA [NM_005157]	35.6491	25.0934	37.8703	60.3923	1.07728	0.872665	-0.700698	0.0275908	A_24_P281101
ABL1	Homo sapiens c-abl oncogene 1, non-receptor tyrosine kinase (ABL1), transcript variant a, mRNA [NM_005157]	27.3339	22.9441	42.6515	69.0927	0.71114	0.760517	-0.51213	0.238796	A_24_P393711
ABL1	Homo sapiens c-abl oncogene 1, non-receptor tyrosine kinase (ABL1), transcript variant a, mRNA [NM_005157]	3188.65	3102.54	5856.44	10737.9	0.888097	1.15055	-0.100003	0.829603	A_23_P60180
ABL1	Homo sapiens c-abl oncogene 1, non-receptor tyrosine kinase (ABL1), transcript variant a, mRNA [NM_005157]	31.9674	24.3481	59.5427	73.5138	0.664216	0.573369	-0.303639	0.0554428	A_24_P291016
ABL1	Homo sapiens c-abl oncogene 1, non-receptor tyrosine kinase (ABL1), transcript variant b, mRNA [NM_007313]	23.4023	18.0598	94.1967	28.7607	0.069149	-0.00277328	0.212996	-1.44359	A_24_P282416
ABL2	Homo sapiens c-abl oncogene 2, non-receptor tyrosine kinase (ABL2), transcript variant b, mRNA [NM_007314]	889.817	479.283	1397.53	3154.34	0.486787	-0.103898	-0.72709	0.50236	A_23_P138099
ABL2	Homo sapiens c-abl oncogene 2, non-receptor tyrosine kinase (ABL2), transcript variant b, mRNA [NM_007314]	796.465	432.342	2053.52	5406.69	-0.34923	-0.92872	-0.847991	0.603648	A_32_P139894
ABL2	Homo sapiens c-abl oncogene 2, non-receptor tyrosine kinase (ABL2), transcript variant b, mRNA [NM_007314]	5.75887	3.97138	23.6769	60.8946	-0.671359	-0.90556	-0.496912	0.92091	A_24_P263878
ABLIM1	Homo sapiens actin binding LIM protein 1 (ABLIM1), transcript variant 3, mRNA [NM_001003408]	2487.89	1362.48	9854.57	4244.76	0.540849	-0.0258923	0.66154	-0.498579	A_23_P202520
ABLIM2	Homo sapiens actin binding LIM protein family, member 2 (ABLIM2), transcript variant 6, mRNA [NM_032432]	10.8511	1.74263	243.485	47.9136	-0.840866	-3.17743	1.78187	-0.508462	A_23_P255672
ABLIM3	Homo sapiens actin binding LIM protein family, member 3 (ABLIM3), mRNA [NM_014945]	162.527	173.502	32.7291	503.922	1.41831	1.81454	-2.7589	1.24065	A_24_P123408
ABLIM3	Homo sapiens actin binding LIM protein family, member 3 (ABLIM3), mRNA [NM_014945]	2752.06	2469.51	162.507	8650.27	2.31613	2.46179	-3.63099	2.15817	A_23_P256205
ABO	Homo sapiens ABO blood group (transferase A, alpha 1-3-N-acetylgalactosaminyltransferase; transferase B, alpha 1-3-galactosyltransferase) (ABO), mRNA [NM_020469]	1.91783	1.64277	3.30005	4.13206	0.305717	0.384322	-0.776443	-0.39708	A_23_P112646
ABR	Homo sapiens active BCR-related (ABR), transcript variant 1, mRNA [NM_021962]	6467.52	10408.2	26966.6	29711	-0.389596	0.59879	-0.194884	-6.96182e-05	A_23_P503182
ABRA	Homo sapiens actin-binding Rho activating protein (ABRA), mRNA [NM_139166]	1.83492	1.6568	3.10637	3.83113	0.291544	0.446177	-0.814117	-0.456586	A_23_P313482
ABRACL	Homo sapiens ABRA C-terminal like (ABRACL), mRNA [NM_021243]	1313.99	962.366	4149.49	15170.3	-1.50975	-1.65711	-1.71596	0.209276	A_32_P160972
ABT1	Homo sapiens activator of basal transcription 1 (ABT1), mRNA [NM_013375]	352.92	233.702	401.423	501.148	0.691915	0.39919	-0.987481	-0.612376	A_23_P30784
ABTB1	Homo sapiens ankyrin repeat and BTB (POZ) domain containing 1 (ABTB1), transcript variant 2, mRNA [NM_172027]	167.75	218.286	297.36	430.083	0.283183	0.965037	-0.756097	-0.168701	A_24_P200297
ABTB1	Homo sapiens ankyrin repeat and BTB (POZ) domain containing 1 (ABTB1), transcript variant 2, mRNA [NM_172027]	261.792	308.675	775.427	1023.15	-0.257638	0.281978	-0.556244	-0.101298	A_23_P109643
ABTB2	Homo sapiens ankyrin repeat and BTB (POZ) domain containing 2 (ABTB2), mRNA [NM_145804]	502.046	255.393	1927.55	3995.34	-0.707275	-1.38043	-0.631576	0.474965	A_23_P356616
ACAA1	Homo sapiens acetyl-CoA acyltransferase 1 (ACAA1), transcript variant 1, mRNA [NM_001607]	2281.29	1855.97	7126.53	10278	0.0588169	0.0630827	-0.163011	0.420265	A_23_P69339
ACAA1	Homo sapiens acetyl-CoA acyltransferase 1 (ACAA1), transcript variant 1, mRNA [NM_001607]	1758.1	1531.8	2653.02	4382.57	0.793786	0.896944	-0.47777	0.301361	A_24_P379858
ACAA2	Homo sapiens acetyl-CoA acyltransferase 2 (ACAA2), mRNA [NM_006111]	327.927	217.141	4925.85	5086.59	-1.17353	-1.46633	0.870216	0.971533	A_23_P89799
ACACA	Homo sapiens acetyl-CoA carboxylase alpha (ACACA), transcript variant 2, mRNA [NM_198839]	58.9168	31.0227	181.184	192.496	-0.136335	-0.759746	-0.380806	-0.238444	A_23_P141434
ACACA	Homo sapiens acetyl-CoA carboxylase alpha (ACACA), transcript variant 2, mRNA [NM_198839]	22.3047	7.49326	94.4994	117.987	-0.895527	-2.16726	-0.677748	-0.302503	A_32_P215318
ACACB	Homo sapiens acetyl-CoA carboxylase beta (ACACB), mRNA [NM_001093]	15.359	17.0376	107.899	14.7597	0.0653453	0.516933	1.0127	-1.80226	A_23_P87791
ACAD10	Homo sapiens acyl-CoA dehydrogenase family, member 10 (ACAD10), transcript variant 2, mRNA [NM_025247]	91.5339	94.1987	252.381	253.88	0.121661	0.46501	-0.280293	-0.216754	A_23_P25348
ACAD10	Homo sapiens acyl-CoA dehydrogenase family, member 10 (ACAD10), transcript variant 2, mRNA [NM_025247]	262.184	284.314	680.409	796.199	0.207634	0.626488	-0.281719	0	A_24_P227450
ACAD10	Homo sapiens acyl-CoA dehydrogenase family, member 10 (ACAD10), transcript variant 2, mRNA [NM_025247]	10.4079	4.65648	34.7346	11.4838	1.02519	0.166776	0.898714	-0.643066	A_24_P8284
ACAD11	Homo sapiens acyl-CoA dehydrogenase family, member 11 (ACAD11), mRNA [NM_032169]	96.4465	271.175	180.967	375.245	0.695032	2.4884	-0.262223	0.844878	A_23_P212497
ACAD8	Homo sapiens acyl-CoA dehydrogenase family, member 8 (ACAD8), mRNA [NM_014384]	108.678	117.365	1151.96	813.2	-0.906898	-0.494009	0.633878	0.186462	A_24_P4678
ACAD8	Homo sapiens acyl-CoA dehydrogenase family, member 8 (ACAD8), mRNA [NM_014384]	92.1896	116.49	682.336	435.363	-0.429356	0.210127	0.593273	0	A_23_P47426
ACAD9	Homo sapiens acyl-CoA dehydrogenase family, member 9 (ACAD9), transcript variant 1, mRNA [NM_014049]	5775.82	4175.66	35495.2	19912.6	-0.428597	-0.594674	0.325752	-0.453197	A_23_P132405
ACAD9	Homo sapiens acyl-CoA dehydrogenase family, member 9 (ACAD9), transcript variant 1, mRNA [NM_014049]	686.409	668.932	6832.77	3414.43	-0.910181	-0.645444	0.539972	-0.405862	A_24_P191656
ACADL	Homo sapiens acyl-CoA dehydrogenase, long chain (ACADL), mRNA [NM_001608]	7.79676	5.68901	12.4433	15.7353	0.738631	0.585879	-0.452119	-0.0584989	A_24_P234242
ACADM	Homo sapiens acyl-CoA dehydrogenase, C-4 to C-12 straight chain (ACADM), transcript variant 1, mRNA [NM_000016]	154.598	95.5132	1684.38	1044.98	-1.06996	-1.46276	0.510489	-0.123268	A_23_P96761
ACADS	Homo sapiens acyl-CoA dehydrogenase, C-2 to C-3 short chain (ACADS), mRNA [NM_000017]	77.8854	35.3448	366.684	182.47	0.132642	-0.705265	0.502578	-0.449313	A_23_P65022
ACADSB	Homo sapiens acyl-CoA dehydrogenase, short/branched chain (ACADSB), mRNA [NM_001609]	108.231	36.014	199.981	215.336	0.798097	-0.487435	-0.181327	-0.0196085	A_23_P158570
ACADSB	Homo sapiens acyl-CoA dehydrogenase, short/branched chain (ACADSB), mRNA [NM_001609]	57.7786	26.5938	150.575	120.564	0.236097	-0.581404	-0.247209	-0.512898	A_24_P189516
ACADSB	Homo sapiens acyl-CoA dehydrogenase, short/branched chain (ACADSB), mRNA [NM_001609]	694.199	230.657	407.305	713.226	2.19684	0.90919	-0.437572	0.425667	A_32_P31945
ACADVL	Homo sapiens acyl-CoA dehydrogenase, very long chain (ACADVL), transcript variant 1, mRNA [NM_000018]	26945.7	28955.1	56730.6	46944.9	0.640382	1.04609	-0.150722	-0.368888	A_23_P207650
ACAN	PREDICTED: Homo sapiens aggrecan (ACAN), transcript variant X1, mRNA [XM_006720419]	1.98015	10.6065	29.9252	19.1335	-1.21714	1.50607	0.835361	0.245092	A_24_P919150
ACAN	Homo sapiens aggrecan (ACAN), transcript variant 2, mRNA [NM_013227]	6.5602	378.774	29.7721	64.3098	-0.133615	6.01978	0.183358	1.34942	A_23_P307310
ACAP1	Homo sapiens cDNA FLJ44545 fis, clone UTERU3005970. [AK126509]	67.993	64.6533	847.96	352.411	-1.09829	-0.869002	0.677074	-0.534671	A_24_P630640
ACAP1	Homo sapiens ArfGAP with coiled-coil, ankyrin repeat and PH domains 1 (ACAP1), mRNA [NM_014716]	2.13233	1.77825	4.10859	4.50673	0.0382919	0.0782604	-0.880674	-0.692247	A_23_P107336
ACAP2	Homo sapiens ArfGAP with coiled-coil, ankyrin repeat and PH domains 2 (ACAP2), mRNA [NM_012287]	873.635	787.009	1832.25	1969.47	0.975278	1.12657	0.178617	0.337797	A_24_P942002
ACAP2	Homo sapiens ArfGAP with coiled-coil, ankyrin repeat and PH domains 2 (ACAP2), mRNA [NM_012287]	724.028	600.258	1039.14	1043.11	1.04931	1.0808	-0.294595	-0.234102	A_23_P211773
ACAP3	Homo sapiens ArfGAP with coiled-coil, ankyrin repeat and PH domains 3 (ACAP3), mRNA [NM_030649]	103.415	119.392	307.237	409.453	0.294264	0.80348	0	0.469338	A_23_P23625
ACAP3	Homo sapiens ArfGAP with coiled-coil, ankyrin repeat and PH domains 3 (ACAP3), mRNA [NM_030649]	301.447	361.286	293.951	375.066	1.62264	2.18582	-0.278874	0.127687	A_23_P23630
ACAP3	Homo sapiens ArfGAP with coiled-coil, ankyrin repeat and PH domains 3 (ACAP3), mRNA [NM_030649]	12.3608	14.2879	86.0177	117.076	-0.510967	0	0.422715	0.922448	A_24_P281497
ACAP3	Homo sapiens ArfGAP with coiled-coil, ankyrin repeat and PH domains 3 (ACAP3), mRNA [NM_030649]	15.2872	18.4092	24.6694	38.1172	0.423959	0.994015	-0.750819	-0.0681057	A_23_P12231
ACAT1	Homo sapiens acetyl-CoA acetyltransferase 1 (ACAT1), mRNA [NM_000019]	522.774	300.273	4530.19	2979.12	-0.498295	-0.99626	0.751839	0.202144	A_24_P203678
ACAT1	Homo sapiens acetyl-CoA acetyltransferase 1 (ACAT1), mRNA [NM_000019]	13305.2	7760.91	42722.1	29935.7	0.390848	-0.0849009	0.208658	-0.249467	A_23_P24515
ACAT2	Homo sapiens acetyl-CoA acetyltransferase 2 (ACAT2), mRNA [NM_005891]	305.255	186.827	6494.39	4818.7	-2.17037	-2.57673	0.37556	0	A_23_P383835
ACAT2	Homo sapiens acetyl-CoA acetyltransferase 2 (ACAT2), mRNA [NM_005891]	2670.05	1740	36745.4	24373.5	-1.84424	-2.16008	0.0732069	-0.464053	A_23_P31135
ACBD3	Homo sapiens gcp60 mRNA for golgi resident protein GCP60, complete cds. [AB043587]	2674.57	2700.03	3858.86	8308.37	0.509978	0.825594	-0.826334	0.335049	A_23_P200477
ACBD3	Homo sapiens acyl-CoA binding domain containing 3 (ACBD3), mRNA [NM_022735]	263.253	216.093	702.429	1702.5	-0.164773	-0.147622	-0.614047	0.71817	A_24_P171182
ACBD4	Homo sapiens acyl-CoA binding domain containing 4 (ACBD4), transcript variant 2, mRNA [NM_024722]	126.992	108.64	126.514	128.63	0.860146	0.93692	-1.01046	-0.931547	A_23_P107166
ACBD4	Homo sapiens acyl-CoA binding domain containing 4 (ACBD4), transcript variant 2, mRNA [NM_024722]	24.2871	24.1432	245.45	339.215	-0.824065	-0.530694	0.647923	1.16968	A_24_P366122
ACBD5	Homo sapiens acyl-CoA binding domain containing 5 (ACBD5), transcript variant 1, mRNA [NM_145698]	586.433	566.87	1486.75	1509.67	0.0111399	0.26414	-0.511917	-0.434854	A_23_P97795
ACBD5	Homo sapiens acyl-CoA binding domain containing 5 (ACBD5), transcript variant 1, mRNA [NM_145698]	1.89756	1.78264	47.0799	74.4343	-0.0490847	0.162734	2.71863	3.43448	A_24_P175563
ACBD6	Homo sapiens acyl-CoA binding domain containing 6 (ACBD6), mRNA [NM_032360]	2285.02	1826.72	15371.6	16581.7	-0.979841	-1.00085	-0.0950289	0.0692825	A_23_P52127
ACBD7	Homo sapiens acyl-CoA binding domain containing 7 (ACBD7), mRNA [NM_001039844]	81.7791	145.134	390.786	671.865	0.132621	1.26215	0.524019	1.3608	A_23_P72584
ACCS	Homo sapiens 1-aminocyclopropane-1-carboxylate synthase homolog (Arabidopsis)(non-functional) (ACCS), transcript variant 1, mRNA [NM_032592]	486.319	393.981	582.541	412.839	1.11036	1.10853	-0.494365	-0.936155	A_23_P24586
ACD	Homo sapiens adrenocortical dysplasia homolog (mouse) (ACD), transcript variant 2, mRNA [NM_022914]	1164.56	881.436	5878.31	1587.88	-0.0732994	-0.173209	0.397141	-1.43617	A_23_P26375
ACE	angiotensin I converting enzyme [Source:HGNC Symbol;Acc:2707] [ENST00000490216]	3.80886	4.25659	3.30636	4.06256	0.480947	0.94323	-1.58835	-1.23621	A_23_P371777
ACE	Homo sapiens angiotensin I converting enzyme (ACE), transcript variant 1, mRNA [NM_000789]	2.09542	4.64213	34.0667	59.1354	-1.54455	-0.0950542	0.613324	1.46398	A_23_P38235
ACE	Homo sapiens angiotensin I converting enzyme (ACE), transcript variant 1, mRNA [NM_000789]	17.9391	14.4657	3.08941	195.803	3.29539	3.28686	-1.10749	4.93342	A_24_P365129
ACE2	Homo sapiens angiotensin I converting enzyme 2 (ACE2), mRNA [NM_021804]	2.28185	1.78921	4.05323	5.47894	0	-0.0489321	-1.03631	-0.546494	A_23_P252981
ACER1	Homo sapiens alkaline ceramidase 1 (ACER1), mRNA [NM_133492]	4.74562	1.76602	39.352	23.6519	-0.118999	-1.24315	1.06759	0.3881	A_23_P38952
ACER3	Homo sapiens alkaline ceramidase 3 (ACER3), mRNA [NM_018367]	614.597	87.0931	864.43	420.2	1.43298	-1.08409	0.059907	-0.925775	A_24_P244420
ACER3	Homo sapiens alkaline ceramidase 3 (ACER3), mRNA [NM_018367]	65.4837	20.2186	467.625	201.578	0.083961	-1.30954	1.05493	-0.104095	A_24_P355693
ACER3	Homo sapiens alkaline ceramidase 3 (ACER3), mRNA [NM_018367]	82.9961	9.28659	185.402	75.6805	1.40318	-1.45469	0.697547	-0.540124	A_23_P203665
ACHE	Homo sapiens acetylcholinesterase (Yt blood group) (ACHE), transcript variant E4-E6, mRNA [NM_000665]	9.21967	10.383	111.304	176.044	-1.48188	-1.0085	0.246598	0.963015	A_24_P60845
ACIN1	Homo sapiens apoptotic chromatin condensation inducer 1 (ACIN1), transcript variant 1, mRNA [NM_014977]	188.708	228.298	1286.8	902.052	-0.446865	0.129843	0.457512	0	A_23_P14389
ACKR1	Homo sapiens atypical chemokine receptor 1 (Duffy blood group) (ACKR1), transcript variant 2, mRNA [NM_002036]	3.42068	3.5482	3.36754	59.4101	0.0871749	0.441927	-1.80059	2.39534	A_23_P115161
ACKR2	Homo sapiens atypical chemokine receptor 2 (ACKR2), mRNA [NM_001296]	3.14281	1.73209	7.72881	12.4996	0.557594	0	-0.00939083	0.739164	A_23_P91954
ACKR3	Homo sapiens atypical chemokine receptor 3 (ACKR3), mRNA [NM_020311]	326.07	7.56064	65.0503	4367.12	-1.02746	-6.15604	-5.21819	0.905785	A_23_P131676
ACKR4	Homo sapiens atypical chemokine receptor 4 (ACKR4), transcript variant 1, mRNA [NM_178445]	2834.72	3206.99	12.0467	1045.31	6.977	7.45696	-2.7666	3.72754	A_23_P6909
ACLY	Human ATP:citrate lyase mRNA, complete cds. [U18197]	776.138	862.846	3926.62	10023.7	-0.873925	-0.419189	-0.400201	1.00684	A_23_P66787
ACMSD	Homo sapiens aminocarboxymuconate semialdehyde decarboxylase (ACMSD), mRNA [NM_138326]	15.6314	11.5229	3.43974	5.82781	2.38185	2.24386	-1.66741	-0.851763	A_23_P376727
ACN9	Homo sapiens ACN9 homolog (S. cerevisiae) (ACN9), mRNA [NM_020186]	1076.45	938.346	3251.2	4179.98	0.184518	0.288371	-0.0859728	0.331541	A_23_P59528
ACO1	Homo sapiens aconitase 1, soluble (ACO1), transcript variant 2, mRNA [NM_002197]	13973.7	7737.52	20316.8	36450.5	0.741849	0.191027	-0.583367	0.314889	A_23_P9416
ACO1	Homo sapiens aconitase 1, soluble (ACO1), transcript variant 2, mRNA [NM_002197]	1778	795.694	5375.64	10668.9	0.169773	-0.688247	-0.0992203	0.944671	A_23_P9415
ACO2	Homo sapiens aconitase 2, mitochondrial (ACO2), mRNA [NM_001098]	9401.54	7127.3	19129	23301.1	0.382524	0.284929	-0.457857	-0.118232	A_23_P103149
ACO2	Homo sapiens aconitase 2, mitochondrial (ACO2), mRNA [NM_001098]	3524.52	2407.54	9564.85	12486.5	0.240149	-0.00777245	-0.184713	0.25483	A_23_P305481
ACOT1	Homo sapiens acyl-CoA thioesterase 1 (ACOT1), mRNA [NM_001037161]	5683.75	5852.86	10081.8	13447.2	0.842305	1.18655	-0.196034	0.274508	A_24_P161036
ACOT11	acyl-CoA thioesterase 11 [Source:HGNC Symbol;Acc:18156] [ENST00000371316]	2.53597	1.82999	10.2487	5.72917	0.639615	0.470859	0.789269	0.00521851	A_24_P945165
ACOT11	Homo sapiens acyl-CoA thioesterase 11 (ACOT11), transcript variant 2, mRNA [NM_147161]	1381.61	1155.51	1066.46	1503.87	1.93857	1.9827	-0.300128	0.250722	A_23_P417415
ACOT11	Homo sapiens acyl-CoA thioesterase 11 (ACOT11), transcript variant 1, mRNA [NM_015547]	32.2951	44.5752	59.5326	58.7626	1.2848	2.05167	0.301989	0.338197	A_23_P325726
ACOT12	Homo sapiens acyl-CoA thioesterase 12 (ACOT12), mRNA [NM_130767]	35.9799	1.79944	5.72395	26.408	3.96438	-0.0552411	-0.552901	1.70798	A_23_P44207
ACOT13	Homo sapiens acyl-CoA thioesterase 13 (ACOT13), transcript variant 1, mRNA [NM_018473]	1255.52	788.011	5710.24	8148.92	-1.12734	-1.49738	-0.807241	-0.239194	A_23_P31116
ACOT2	Homo sapiens acyl-CoA thioesterase 2 (ACOT2), transcript variant 1, mRNA [NM_006821]	376.109	525.127	943.029	978.297	0.606702	1.39016	0.0676756	0.175636	A_24_P301195
ACOT2	Homo sapiens acyl-CoA thioesterase 2 (ACOT2), transcript variant 1, mRNA [NM_006821]	5622.04	5855.03	8605.9	11517.9	0.985383	1.34591	-0.265561	0.209913	A_23_P3111
ACOT4	Homo sapiens acyl-CoA thioesterase 4 (ACOT4), mRNA [NM_152331]	23.4212	11.1675	3.55643	491.844	-2.58213	-3.34869	-7.16662	0	A_23_P14515
ACOT7	Homo sapiens acyl-CoA thioesterase 7 (ACOT7), transcript variant hBACHa, mRNA [NM_007274]	2668.66	2695.47	19067.1	8424.33	-0.352924	-0.0365534	0.618802	-0.504663	A_24_P205589
ACOT8	Homo sapiens acyl-CoA thioesterase 8 (ACOT8), mRNA [NM_005469]	910.43	659.279	2450.62	1748.31	0.436648	0.272937	0	-0.432199	A_23_P143218
ACOT9	Homo sapiens acyl-CoA thioesterase 9 (ACOT9), transcript variant 1, mRNA [NM_001037171]	7926.41	5560.12	30706	19356.1	0.522139	0.312532	0.610741	0	A_23_P125624
ACOT9	Homo sapiens acyl-CoA thioesterase 9 (ACOT9), transcript variant 1, mRNA [NM_001037171]	1069.88	726.723	7052.83	4006.66	-0.157587	-0.41361	0.69799	-0.0628204	A_24_P42501
ACOX1	Homo sapiens acyl-CoA oxidase 1, palmitoyl (ACOX1), transcript variant 1, mRNA [NM_004035]	660.882	481.312	1791.43	3162.68	0.310653	0.155178	-0.115874	0.75915	A_23_P206945
ACOX1	Homo sapiens acyl-CoA oxidase 1, palmitoyl (ACOX1), transcript variant 1, mRNA [NM_004035]	1.90354	1.7	12.48	13.591	-1.66148	-1.52268	-0.813798	-0.635769	A_24_P935889
ACOX1	Homo sapiens acyl-CoA oxidase 1, palmitoyl (ACOX1), transcript variant 1, mRNA [NM_004035]	536.47	296.32	1457.67	1615.33	0.475707	-0.0786867	0.0526276	0.25578	A_23_P77761
ACOX2	Homo sapiens acyl-CoA oxidase 2, branched chain (ACOX2), mRNA [NM_003500]	1206.32	632.976	52.2977	2347.97	3.96734	3.33889	-2.42556	3.11795	A_23_P10182
ACOX3	Homo sapiens acyl-CoA oxidase 3, pristanoyl (ACOX3), transcript variant 1, mRNA [NM_003501]	521.623	262.861	1059.84	1066.99	0.777723	0.0909596	-0.064682	0	A_24_P354451
ACOX3	Homo sapiens acyl-CoA oxidase 3, pristanoyl (ACOX3), transcript variant 1, mRNA [NM_003501]	657.624	603.404	1048.32	1140.13	0.727486	0.905294	-0.464952	-0.288839	A_23_P316381
ACOXL	Homo sapiens cDNA FLJ11042 fis, clone PLACE1004428, weakly similar to PRISTANOYL-COA OXIDASE (EC 1.3.3.-). [AK001904]	1.88542	1.76038	3.36542	3.9553	0.388208	0.591164	-0.641063	-0.353071	A_23_P143034
ACP1	Homo sapiens acid phosphatase 1, soluble (ACP1), transcript variant 3, mRNA [NM_004300]	4224.87	2860.34	8953.23	9652.26	0.512287	0.251515	-0.269388	-0.10594	A_23_P56798
ACP1	Homo sapiens acid phosphatase 1, soluble (ACP1), transcript variant 4, mRNA [NM_001040649]	1.91812	5.23894	3.93848	4.68314	0.0618944	1.81342	-0.76534	-0.460511	A_24_P922919
ACP2	Homo sapiens acid phosphatase 2, lysosomal (ACP2), transcript variant 1, mRNA [NM_001610]	266.907	250.781	783.921	742.897	0.446445	0.658478	0.135636	0.113081	A_23_P138776
ACP2	Homo sapiens acid phosphatase 2, lysosomal (ACP2), transcript variant 1, mRNA [NM_001610]	206.291	178.346	303.822	323.709	1.2549	1.34684	-0.0517359	0.0947266	A_23_P138782
ACP5	Homo sapiens acid phosphatase 5, tartrate resistant (ACP5), transcript variant 4, mRNA [NM_001611]	25.2521	126.812	19.7628	902.891	-0.988776	1.64138	-3.20757	2.36112	A_23_P142075
ACP6	Homo sapiens acid phosphatase 6, lysophosphatidic (ACP6), mRNA [NM_016361]	110.205	208.45	600.068	252.946	-0.806191	0.415262	-0.226437	-1.41774	A_23_P160240
ACPP	Homo sapiens acid phosphatase, prostate (ACPP), transcript variant 1, mRNA [NM_001099]	139.288	106.454	3.49167	140.104	5.90043	5.81453	-1.28276	4.09867	A_24_P46130
ACPP	Homo sapiens acid phosphatase, prostate (ACPP), transcript variant 1, mRNA [NM_001099]	16.0035	13.8299	3.35478	33.1868	1.57992	1.67127	-2.53936	0.821958	A_24_P37589
ACPT	Homo sapiens acid phosphatase, testicular (ACPT), mRNA [NM_033068]	14.6513	10.2849	59.4349	38.8824	0.228583	0.0200281	0.383689	-0.173512	A_23_P330419
ACR	Homo sapiens acrosin (ACR), mRNA [NM_001097]	12.4115	3.85952	55.5945	68.1625	-0.0289278	-1.41216	0.269162	0.618189	A_32_P191262
ACR	Homo sapiens acrosin (ACR), mRNA [NM_001097]	16.9524	11.3214	35.1807	42.3216	1.08567	0.805172	0.273785	0.595387	A_23_P40734
ACRBP	Homo sapiens acrosin binding protein (ACRBP), mRNA [NM_032489]	5.73183	6.85946	11.1159	8.56108	0.0527801	0.613826	-0.856843	-1.17861	A_23_P151120
ACRC	Homo sapiens acidic repeat containing (ACRC), mRNA [NM_052957]	69.9159	121.536	220.721	794.733	-1.54153	-0.441893	-1.74817	0.155062	A_23_P171237
ACRV1	Homo sapiens acrosomal vesicle protein 1 (ACRV1), transcript variant 1, mRNA [NM_001612]	6.19264	8.7339	4.18686	32.5048	0.218651	1.01667	-2.21121	0.800491	A_23_P202894
ACSBG1	Homo sapiens acyl-CoA synthetase bubblegum family member 1 (ACSBG1), transcript variant 1, mRNA [NM_015162]	2.14888	13.057	38.6265	11.8554	-0.868751	2.03636	1.43401	-0.215051	A_23_P54488
ACSBG1	acyl-CoA synthetase bubblegum family member 1 [Source:HGNC Symbol;Acc:29567] [ENST00000258873]	2.1744	1.85462	3.43678	4.33721	0.275693	0.348142	-0.929045	-0.538345	A_24_P941736
ACSBG2	Homo sapiens acyl-CoA synthetase bubblegum family member 2 (ACSBG2), transcript variant 2, mRNA [NM_030924]	9.10993	8.87614	14.0826	17.1857	0.292445	0.556885	-0.944326	-0.602044	A_23_P131050
ACSF2	Homo sapiens acyl-CoA synthetase family member 2 (ACSF2), transcript variant 2, mRNA [NM_025149]	765.784	326.633	2162.42	2030.8	0.927322	0	0.559783	0.524172	A_23_P4190
ACSF3	acyl-CoA synthetase family member 3 [Source:HGNC Symbol;Acc:27288] [ENST00000393145]	2.09395	2.42554	29.9958	12.6403	-0.8244	-0.310378	1.15088	-0.0408568	A_24_P239309
ACSF3	Homo sapiens acyl-CoA synthetase family member 3 (ACSF3), transcript variant 1, mRNA [NM_174917]	966.101	578.85	2460.04	1917.74	0.488157	0.0511198	-0.0285835	-0.332868	A_32_P218332
ACSF3	Homo sapiens acyl-CoA synthetase family member 3 (ACSF3), transcript variant 1, mRNA [NM_174917]	241.301	253.146	1194.69	931.981	-0.371082	0	0.071466	-0.231802	A_23_P259797
ACSL1	Homo sapiens acyl-CoA synthetase long-chain family member 1 (ACSL1), transcript variant 1, mRNA [NM_001995]	645.004	358.449	2529.09	3982.68	0.462398	-0.0831938	0.568458	1.27857	A_23_P110212
ACSL3	Homo sapiens acyl-CoA synthetase long-chain family member 3 (ACSL3), transcript variant 1, mRNA [NM_004457]	538.656	248.664	2012.46	2595.05	-0.173727	-0.986947	-0.137377	0.284413	A_24_P248606
ACSL3	Homo sapiens acyl-CoA synthetase long-chain family member 3 (ACSL3), transcript variant 1, mRNA [NM_004457]	1519.48	116.984	2451.26	3306.03	0.816629	-2.58061	-0.358599	0.127968	A_24_P37319
ACSL4	Homo sapiens acyl-CoA synthetase long-chain family member 4 (ACSL4), transcript variant 1, mRNA [NM_004458]	1122.44	883.582	2593.48	5174.3	0.534864	0.491606	-0.122065	0.9294	A_23_P217564
ACSL5	Homo sapiens acyl-CoA synthetase long-chain family member 5 (ACSL5), transcript variant 3, mRNA [NM_203380]	16.0238	2.5822	3.72174	59.311	-0.0778961	-2.4095	-4.04924	0	A_24_P201360
ACSL6	Homo sapiens acyl-CoA synthetase long-chain family member 6 (ACSL6), transcript variant 2, mRNA [NM_001009185]	3.62909	2.17194	3.97548	4.8499	0.966782	0.528102	-0.766874	-0.42506	A_24_P941526
ACSL6	Homo sapiens acyl-CoA synthetase long-chain family member 6 (ACSL6), transcript variant 2, mRNA [NM_001009185]	2.16495	1.82157	15.7031	5.75725	-0.0828443	-0.0300484	0.910617	-0.481987	A_23_P7562
ACSL6	acyl-CoA synthetase long-chain family member 6 [Source:HGNC Symbol;Acc:16496] [ENST00000489047]	4.78294	1.73224	3.9402	4.78766	1.51198	0.348673	-0.632825	-0.29678	A_23_P415806
ACSM1	Homo sapiens acyl-CoA synthetase medium-chain family member 1 (ACSM1), mRNA [NM_052956]	2.1115	1.82635	3.50976	4.38829	0.426971	0.51961	-0.705103	-0.327826	A_23_P106933
ACSM2A	Homo sapiens acyl-CoA synthetase medium-chain family member 2A (ACSM2A), mRNA [NM_001010845]	12.0353	1.73403	18.4483	5.78197	1.58099	-0.912137	0.332026	-1.28684	A_24_P220548
ACSM2A	Homo sapiens acyl-CoA synthetase medium-chain family member 2A (ACSM2A), mRNA [NM_001010845]	3.44914	4.03805	3.36305	4.24222	0.850745	1.38012	-1.0509	-0.660859	A_24_P18834
ACSM2B	Homo sapiens acyl-CoA synthetase medium-chain family member 2B (ACSM2B), transcript variant 1, mRNA [NM_182617]	4.74235	1.7306	17.1687	21.3786	0.148651	-1.00374	0.139584	0.510958	A_23_P66328
ACSM3	Homo sapiens acyl-CoA synthetase medium-chain family member 3 (ACSM3), transcript variant 2, mRNA [NM_202000]	2.7155	4.7533	3.68623	19.5179	-1.17425	-0.06459	-2.5985	-0.138927	A_23_P317756
ACSM5	acyl-CoA synthetase medium-chain family member 5 [Source:HGNC Symbol;Acc:26060] [ENST00000331849]	6.76111	1.68681	3.667	9.5498	1.23064	-0.470376	-1.5172	-0.0813384	A_23_P44919
ACSM5	Homo sapiens acyl-CoA synthetase medium-chain family member 5 (ACSM5), mRNA [NM_017888]	8.39139	5.68057	3.49055	4.34513	2.01418	1.75326	-1.11645	-0.745513	A_24_P350173
ACSM5	Homo sapiens acyl-CoA synthetase medium-chain family member 5, mRNA (cDNA clone IMAGE:4069865), complete cds. [BC016703]	1.9462	1.7522	3.34003	3.83411	0.123452	0.273908	-0.962522	-0.7085	A_24_P367776
ACSS1	Homo sapiens acyl-CoA synthetase short-chain family member 1 (ACSS1), transcript variant 1, mRNA [NM_032501]	14.2248	6.31819	28.8161	30.2606	-0.604716	-1.47359	-1.45142	-1.32587	A_24_P185689
ACSS1	Homo sapiens acyl-CoA synthetase short-chain family member 1 (ACSS1), transcript variant 1, mRNA [NM_032501]	112.893	17.14	332.341	406.732	-1.94342	-4.36099	-2.25088	-1.90448	A_23_P120594
ACSS1	Homo sapiens mRNA for FLJ00013 protein, partial cds. [AK024424]	3.84614	1.8006	8.92117	7.18637	-0.594972	-1.38796	-1.24633	-1.5033	A_24_P940831
ACSS2	Homo sapiens acyl-CoA synthetase short-chain family member 2 (ACSS2), transcript variant 1, mRNA [NM_018677]	100.277	48.1149	1687.96	665.402	-1.09842	-1.85591	1.10962	-0.17837	A_24_P156295
ACSS2	Homo sapiens acyl-CoA synthetase short-chain family member 2 (ACSS2), transcript variant 1, mRNA [NM_018677]	1108.97	546.568	4502.35	3749.36	0.302399	-0.416404	0.458678	0.249636	A_23_P210900
ACSS3	Homo sapiens acyl-CoA synthetase short-chain family member 3 (ACSS3), mRNA [NM_024560]	418.451	236.529	6.59966	315.41	4.48373	3.96264	-3.36797	2.26572	A_23_P339119
ACTA1	Homo sapiens actin, alpha 1, skeletal muscle (ACTA1), mRNA [NM_001100]	4.09055	6.162	52.4725	32.8759	-1.37283	-0.479785	0.443183	-0.176358	A_23_P1102
ACTA2	Homo sapiens actin, alpha 2, smooth muscle, aorta (ACTA2), transcript variant 2, mRNA [NM_001613]	6802.53	4962.28	138774	7918.06	3.14018	2.98706	5.62553	1.54907	A_23_P150053
ACTA2-AS1	Homo sapiens cDNA FLJ36021 fis, clone TESTI2016568. [AK093340]	2.00678	1.78642	3.37141	3.83648	0.460234	0.594375	-0.656472	-0.415049	A_24_P92680
ACTB	Homo sapiens actin, beta (ACTB), mRNA [NM_001101]	27456.5	28995	127934	139432	0	0.380602	0.355	0.534153	A_23_P135769
ACTB	Homo sapiens actin, beta (ACTB), mRNA [NM_001101]	27406.4	26537.6	255115	221966	-0.582495	-0.32702	0.770893	0.625073	A_23_P31323
ACTB	Homo sapiens actin, beta (ACTB), mRNA [NM_001101]	19678	20620.3	292069	300937	-1.78106	-1.41163	0.24542	0.343563	A_32_P137939
ACTB	Homo sapiens actin, beta (ACTB), mRNA [NM_001101]	23897.5	21915.4	175998	141965	-0.0648804	0.112149	0.950573	0.695539	A_24_P226554
ACTBL2	Homo sapiens actin, beta-like 2 (ACTBL2), mRNA [NM_001017992]	1723.81	1941.67	13503.7	6258.07	1.50239	1.97604	2.6069	1.55233	A_24_P6903
ACTC1	Homo sapiens actin, alpha, cardiac muscle 1 (ACTC1), mRNA [NM_005159]	34.9235	10.4797	86.1671	47.6743	0.491695	-0.942954	-0.0705433	-0.869476	A_23_P205894
ACTC1	Homo sapiens actin, alpha, cardiac muscle 1 (ACTC1), mRNA [NM_005159]	3483.24	4106.11	48114.6	30281.6	0	0.539289	1.9228	1.30975	A_24_P121535
ACTG1	Homo sapiens actin, gamma 1 (ACTG1), transcript variant 2, mRNA [NM_001614]	44523.1	46140.9	270572	251788	-0.3226	0.0308361	0.415606	0.366795	A_23_P44037
ACTG1	Homo sapiens actin, gamma 1 (ACTG1), transcript variant 2, mRNA [NM_001614]	13083.2	13691.2	209244	234483	-1.74222	-1.37474	0.391994	0.611288	A_32_P175198
ACTG1	Homo sapiens actin, gamma 1 (ACTG1), transcript variant 2, mRNA [NM_001614]	3707.27	3828.85	182605	172543	-2.29678	-1.94828	1.46027	1.43349	A_32_P156963
ACTG1P4	Homo sapiens actin, gamma 1 pseudogene 4 (ACTG1P4), non-coding RNA [NR_024438]	11.0318	6.74563	1039.54	797.806	-0.878489	-1.28619	3.81447	3.48762	A_24_P915227
ACTG2	Homo sapiens actin, gamma 2, smooth muscle, enteric (ACTG2), transcript variant 1, mRNA [NM_001615]	30388.6	27510.5	15518	319.791	9.38724	9.54564	6.55247	1.00679	A_23_P39955
ACTL6A	Homo sapiens actin-like 6A (ACTL6A), transcript variant 3, mRNA [NM_178042]	6874.4	5496.26	23058.8	10704.4	0.0569496	0.0361118	-0.0622139	-1.11434	A_23_P69249
ACTL6B	Homo sapiens actin-like 6B (ACTL6B), mRNA [NM_016188]	8.01641	6.7618	39.0733	35.9494	0	0.0563979	0.41998	0.354753	A_23_P145681
ACTL7A	Homo sapiens actin-like 7A (ACTL7A), mRNA [NM_006687]	1.97819	1.77367	16.1508	14.2702	-1.16418	-1.01967	0	-0.123615	A_23_P31984
ACTL7B	Homo sapiens actin-like 7B (ACTL7B), mRNA [NM_006686]	8.5357	4.40011	15.7378	15.0318	0.886813	0.23279	-0.095716	-0.106941	A_23_P9186
ACTL8	Homo sapiens actin-like 8 (ACTL8), mRNA [NM_030812]	23.885	4.89317	50.1905	14.9322	1.05859	-0.926726	0.264723	-1.42927	A_32_P176018
ACTL9	Homo sapiens actin-like 9 (ACTL9), mRNA [NM_178525]	2.02466	1.78521	18.6216	9.42459	-0.486928	-0.366565	0.849119	-0.0783648	A_23_P319682
ACTN1	Homo sapiens actinin, alpha 1 (ACTN1), transcript variant 2, mRNA [NM_001102]	11370.9	8566.74	71977.3	31586.2	0.577663	0.471078	1.37468	0.24142	A_24_P107695
ACTN1	Homo sapiens actinin, alpha 1 (ACTN1), transcript variant 2, mRNA [NM_001102]	9008.94	6512.48	83438.8	35474.8	0.166203	0	1.51231	0.333381	A_23_P105957
ACTN1	actinin, alpha 1 [Source:HGNC Symbol;Acc:163] [ENST00000556083]	20585.8	33063.7	70845.2	61256.5	-0.364568	0.620977	-0.446723	-0.601539	A_32_P167278
ACTN2	Homo sapiens actinin, alpha 2 (ACTN2), transcript variant 1, mRNA [NM_001103]	1.91158	2.90018	14.1273	488.158	-3.8002	-2.89687	-2.77972	2.38606	A_23_P115021
ACTN3	Homo sapiens actinin, alpha 3 (ACTN3), transcript variant 1, coding, mRNA [NM_001104]	16.1862	22.1796	2166.8	952.686	-2.06373	-1.30732	3.13575	2.00525	A_23_P138881
ACTN4	Homo sapiens actinin, alpha 4 (ACTN4), mRNA [NM_004924]	565.714	324.144	5434.6	1826.23	-0.475961	-0.977449	0.922892	-0.595419	A_23_P315241
ACTN4	Homo sapiens actinin, alpha 4 (ACTN4), mRNA [NM_004924]	4066.33	2337.02	15181.4	6041.24	0.570906	0.0737972	0.606231	-0.668164	A_23_P101655
ACTR10	Homo sapiens actin-related protein 10 homolog (S. cerevisiae) (ACTR10), mRNA [NM_018477]	2355.36	1810.95	12387.1	19760.8	-0.51152	-0.588774	0.0181284	0.746917	A_24_P253318
ACTR10	Homo sapiens actin-related protein 10 homolog (S. cerevisiae) (ACTR10), mRNA [NM_018477]	7212.73	5968.39	14138.4	22214.1	0.575006	0.60375	-0.319172	0.387679	A_23_P151690
ACTR1A	Homo sapiens ARP1 actin-related protein 1 homolog A, centractin alpha (yeast) (ACTR1A), mRNA [NM_005736]	1199.45	818.965	1982.61	2201.97	0.635344	0.386787	-0.504806	-0.298427	A_24_P269853
ACTR1A	Homo sapiens ARP1 actin-related protein 1 homolog A, centractin alpha (yeast) (ACTR1A), mRNA [NM_005736]	2921.22	2745.49	4924.35	6779.58	0.588031	0.80047	-0.523781	-0.0075283	A_24_P278367
ACTR1A	Homo sapiens ARP1 actin-related protein 1 homolog A, centractin alpha (yeast) (ACTR1A), mRNA [NM_005736]	8971.12	5701.51	11217.1	12137.4	1.04601	0.694014	-0.496831	-0.328077	A_24_P261326
ACTR1B	Homo sapiens ARP1 actin-related protein 1 homolog B, centractin beta (yeast) (ACTR1B), mRNA [NM_005735]	866.375	804.113	3029.52	4519.93	-0.370043	-0.175691	-0.429196	0.203008	A_23_P28279
ACTR2	Homo sapiens ARP2 actin-related protein 2 homolog (yeast) (ACTR2), transcript variant 1, mRNA [NM_001005386]	1257.65	677.626	8212.35	7812.79	0.109671	-0.480556	0.951554	0.934588	A_23_P377376
ACTR2	Homo sapiens ARP2 actin-related protein 2 homolog (yeast) (ACTR2), transcript variant 1, mRNA [NM_001005386]	26.3134	14.6954	407.529	216.264	-0.878022	-1.41651	1.20983	0.350715	A_24_P276947
ACTR3	Homo sapiens ARP3 actin-related protein 3 homolog (yeast) (ACTR3), transcript variant 1, mRNA [NM_005721]	2900.28	2078.75	11493.3	10662.1	0.0615883	-0.116944	0.182942	0.129632	A_24_P105771
ACTR3	Homo sapiens ARP3 actin-related protein 3 homolog (yeast) (ACTR3), transcript variant 1, mRNA [NM_005721]	3260.35	1563.7	12301.9	13120.4	0.0250816	-0.733039	0.0756807	0.223608	A_24_P231513
ACTR3	Homo sapiens ARP3 actin-related protein 3 homolog (yeast) (ACTR3), transcript variant 1, mRNA [NM_005721]	15446.1	14477.7	55637.4	57229.3	0.0697928	0.278324	0.0534248	0.149116	A_23_P108785
ACTR3B	Homo sapiens ARP3 actin-related protein 3 homolog B (yeast) (ACTR3B), transcript variant 2, mRNA [NM_001040135]	20.6125	17.7904	532.945	309.407	-2.73865	-2.64912	0.0885715	-0.64092	A_24_P303594
ACTR3B	Homo sapiens ARP3 actin-related protein 3 homolog B (yeast) (ACTR3B), transcript variant 1, mRNA [NM_020445]	602.814	516.357	1535.44	959.708	0.37203	0.450632	-0.144279	-0.767273	A_23_P123193
ACTR3BP2	Homo sapiens ACTR3B pseudogene 2 (ACTR3BP2), non-coding RNA [NR_027714]	2.25573	1.93172	148.718	93.4975	-3.78347	-3.70524	0.394194	-0.220398	A_32_P141437
ACTR3C	Homo sapiens ARP3 actin-related protein 3 homolog C (yeast) (ACTR3C), transcript variant 1, mRNA [NM_001164458]	1.98043	7.47105	169.863	309.49	-5.91371	-3.69626	-1.35646	-0.435954	A_24_P76635
ACTR5	Homo sapiens ARP5 actin-related protein 5 homolog (yeast) (ACTR5), mRNA [NM_024855]	98.7034	99.2699	1155.77	374.561	-0.929959	-0.619755	0.754474	-0.816115	A_23_P165952
ACTR6	Homo sapiens ARP6 actin-related protein 6 homolog (yeast) (ACTR6), transcript variant 1, mRNA [NM_022496]	2805.14	2443.96	7573.67	5604.22	0.230251	0.333346	-0.202009	-0.581496	A_23_P162596
ACTR8	Homo sapiens ARP8 actin-related protein 8 homolog (yeast) (ACTR8), mRNA [NM_022899]	73.5501	45.7878	457.644	674.518	-0.418317	-0.800133	0.353933	0.968554	A_23_P80694
ACTR8	Homo sapiens ARP8 actin-related protein 8 homolog (yeast) (ACTR8), mRNA [NM_022899]	359.601	310.248	1797.07	1746.26	-0.0986061	-0.00963593	0.357393	0.371007	A_24_P131697
ACTRT1	Homo sapiens actin-related protein T1 (ACTRT1), mRNA [NM_138289]	1.97833	1.75271	13.0027	4.05375	0.330235	0.457488	1.18151	-0.444974	A_23_P147311
ACTRT2	Homo sapiens actin-related protein T2 (ACTRT2), mRNA [NM_080431]	1.86836	1.89747	21.6786	6.22345	-0.235581	0.0886736	1.43567	-0.309822	A_23_P148829
ACTRT3	Homo sapiens actin-related protein T3 (ACTRT3), mRNA [NM_032487]	137.31	121.263	34.009	442.811	1.36131	1.48396	-2.51731	1.24038	A_23_P121447
ACVR1	Homo sapiens activin A receptor, type I (ACVR1), transcript variant 1, mRNA [NM_001105]	2440.31	1557.61	2003.33	5283.05	1.54824	1.20246	-0.601602	0.852358	A_23_P79221
ACVR1B	Homo sapiens activin A receptor, type IB (ACVR1B), transcript variant 1, mRNA [NM_004302]	2.22198	3.57879	19.3121	23.3424	-1.07046	-0.0808868	0.183946	0.51239	A_23_P99036
ACVR1B	Homo sapiens activin A receptor, type IB (ACVR1B), transcript variant 1, mRNA [NM_004302]	82.9605	38.6719	329.337	362.381	0.0485373	-0.750656	0.172428	0.36536	A_24_P341897
ACVR1C	Homo sapiens activin A receptor, type IC (ACVR1C), transcript variant 1, mRNA [NM_145259]	8.4074	1.65887	4.40566	12.8818	1.19459	-0.844927	-1.60289	0	A_32_P190944
ACVR1C	Homo sapiens activin A receptor, type IC (ACVR1C), transcript variant 1, mRNA [NM_145259]	90.5331	44.7574	3.19101	96.2757	3.30876	2.59439	-3.38278	1.5873	A_23_P397455
ACVR2A	Homo sapiens activin A receptor, type IIA (ACVR2A), transcript variant 2, mRNA [NM_001616]	46.3629	16.9414	228.773	326.472	0.0426564	-1.10781	0.480354	1.04839	A_23_P153930
ACVR2B	Homo sapiens activin A receptor, type IIB (ACVR2B), mRNA [NM_001106]	214.422	184.735	1492.82	493.86	-0.957991	-0.871043	-0.0236521	-1.56453	A_24_P231132
ACVR2B	Homo sapiens activin A receptor, type IIB (ACVR2B), mRNA [NM_001106]	14.9352	17.8132	123.492	24.6648	-1.21241	-0.656236	-0.0299606	-2.29886	A_23_P109950
ACVR2B	Homo sapiens activin A receptor, type IIB (ACVR2B), mRNA [NM_001106]	14.7338	12.333	263.886	146.214	-2.74501	-2.69968	-0.44748	-1.24432	A_32_P134209
ACVRL1	Homo sapiens activin A receptor type II-like 1 (ACVRL1), transcript variant 1, mRNA [NM_000020]	92.365	14.641	3.65918	74.4317	4.61341	2.25803	-1.90952	2.4918	A_24_P324783
ACVRL1	Homo sapiens activin A receptor type II-like 1 (ACVRL1), transcript variant 1, mRNA [NM_000020]	2105.76	285.615	3.32045	970.875	6.21197	3.63172	-4.96195	3.2848	A_24_P945113
ACY1	Homo sapiens aminoacylase 1 (ACY1), transcript variant 1, mRNA [NM_000666]	2478.2	1640.01	3377.28	3051.52	0.845441	0.551799	-0.573167	-0.664509	A_23_P57868
ACY3	Homo sapiens aspartoacylase (aminocyclase) 3 (ACY3), mRNA [NM_080658]	2.26215	1.89594	10.715	16.4317	-0.716745	-0.669582	-0.33806	0.333783	A_23_P47102
ACYP1	Homo sapiens acylphosphatase 1, erythrocyte (common) type (ACYP1), transcript variant 2, mRNA [NM_203488]	530.703	438.193	8204.58	2972.84	-1.17354	-1.14793	0.911738	-0.497859	A_23_P163143
ACYP2	AGENCOURT_6818400 NIH_MGC_114 Homo sapiens cDNA clone IMAGE:5762573 5', mRNA sequence [BQ066852]	261.173	121.137	386.737	363.256	0.730272	-0.0761456	-0.568559	-0.603932	A_32_P1587
ACYP2	H.sapiens mRNA for acylphosphatase, muscle type (MT) isoenzyme. [X84195]	266.608	203.078	640.447	1075.73	0.544775	0.454033	-0.0560455	0.747115	A_23_P159424
ACYP2	Homo sapiens acylphosphatase 2, muscle type (ACYP2), mRNA [NM_138448]	258.918	202.157	902.897	1608.96	0.0631132	0.00803804	0	0.888482	A_23_P256988
ACYP2	Homo sapiens acylphosphatase 2, muscle type (ACYP2), mRNA [NM_138448]	370.377	285.015	1067.67	1684.45	0.229712	0.153704	-0.108071	0.604734	A_24_P336848
ADA	Homo sapiens adenosine deaminase (ADA), mRNA [NM_000022]	2396.92	859.72	27936.3	6228.8	-0.393464	-1.57076	1.28424	-0.825878	A_23_P210482
ADAD1	Homo sapiens adenosine deaminase domain containing 1 (testis-specific) (ADAD1), transcript variant 1, mRNA [NM_139243]	3.69491	1.81722	12.2972	4.42807	0.904017	0.182154	0.773565	-0.645029	A_23_P41514
ADAD2	Homo sapiens adenosine deaminase domain containing 2 (ADAD2), transcript variant 1, mRNA [NM_139174]	4.9503	1.71642	49.8287	47.3703	-0.67377	-1.89994	0.792444	0.77444	A_23_P49136
ADAL	Homo sapiens adenosine deaminase-like (ADAL), transcript variant 2, mRNA [NM_001012969]	262.429	169.206	773.695	678.464	0.18074	-0.150463	-0.124601	-0.259103	A_24_P193482
ADAL	Homo sapiens adenosine deaminase-like (ADAL), transcript variant 1, mRNA [NM_001159280]	423.922	239.24	409.649	351.438	1.39261	0.869222	-0.521976	-0.688101	A_32_P208097
ADAL	Homo sapiens adenosine deaminase-like (ADAL), transcript variant 1, mRNA [NM_001159280]	226.913	124.93	330.559	325.12	1.13494	0.57587	-0.187467	-0.156411	A_23_P14845
ADAL	Homo sapiens adenosine deaminase-like (ADAL), transcript variant 1, mRNA [NM_001159280]	53.9661	50.5241	176.957	104.344	0.27358	0.480444	0.121674	-0.585383	A_32_P221694
ADAM10	Homo sapiens ADAM metallopeptidase domain 10 (ADAM10), mRNA [NM_001110]	1264.81	705.816	817.767	1699.46	1.38403	0.844423	-1.1103	0	A_23_P48886
ADAM11	Homo sapiens ADAM metallopeptidase domain 11 (ADAM11), mRNA [NM_002390]	25.6415	17.0699	102.417	10.4416	0.961251	0.676171	1.09398	-2.14508	A_23_P207345
ADAM11	Homo sapiens ADAM metallopeptidase domain 11 (ADAM11), mRNA [NM_002390]	3.0991	4.26826	105.61	35.9177	-2.1395	-1.37575	1.08608	-0.414909	A_23_P502158
ADAM12	Homo sapiens ADAM metallopeptidase domain 12 (ADAM12), transcript variant 2, mRNA [NM_021641]	47.2459	27.0812	3.31397	609.002	1.89661	1.39566	-3.80212	3.77461	A_23_P350512
ADAM12	Homo sapiens ADAM metallopeptidase domain 12 (ADAM12), transcript variant 1, mRNA [NM_003474]	1138.7	621.315	92.8448	9306.49	1.57433	1.00229	-3.90727	2.795	A_23_P202327
ADAM15	Homo sapiens ADAM metallopeptidase domain 15 (ADAM15), transcript variant 1, mRNA [NM_207191]	860.342	576.643	3155.4	4103.66	-0.443744	-0.719028	-0.434079	0	A_23_P159227
ADAM17	Homo sapiens ADAM metallopeptidase domain 17 (ADAM17), mRNA [NM_003183]	355.686	326.236	1559.47	1886.06	-0.707717	-0.530459	-0.440518	-0.111203	A_23_P143120
ADAM17	Homo sapiens ADAM metallopeptidase domain 17 (ADAM17), mRNA [NM_003183]	1423.77	968.947	4039.93	5021.91	-0.5002	-0.753481	-0.860764	-0.491869	A_32_P129621
ADAM17	ADAM metallopeptidase domain 17 [Source:HGNC Symbol;Acc:195] [ENST00000310823]	382.117	306.284	767.728	1344.16	-0.33991	-0.357107	-1.19851	-0.335475	A_24_P157053
ADAM18	Homo sapiens ADAM metallopeptidase domain 18 (ADAM18), transcript variant 1, mRNA [NM_014237]	1.91892	4.72123	3.32203	3.82238	0.0713501	1.67217	-1.00206	-0.744659	A_23_P72527
ADAM19	Homo sapiens ADAM metallopeptidase domain 19 (ADAM19), mRNA [NM_033274]	1325.55	5614.42	19052	8339.4	-0.405584	1.97891	1.57452	0.43758	A_23_P374082
ADAM19	Homo sapiens ADAM metallopeptidase domain 19 (ADAM19), mRNA [NM_033274]	8.00604	32.2201	77.1519	53.053	-0.59624	1.71451	0.807123	0.321846	A_23_P81369
ADAM2	Homo sapiens ADAM metallopeptidase domain 2 (ADAM2), transcript variant 1, mRNA [NM_001464]	1.84603	1.66638	3.12457	3.83085	0.340613	0.494852	-0.765331	-0.416334	A_23_P136832
ADAM20	Homo sapiens ADAM metallopeptidase domain 20 (ADAM20), mRNA [NM_003814]	5.87576	4.64651	3.81707	7.30198	0.665379	0.628696	-1.82211	-0.831295	A_23_P48698
ADAM20P1	Homo sapiens ADAM metallopeptidase domain 20 pseudogene 1 (ADAM20P1), non-coding RNA [NR_037933]	2.10494	1.79433	25.0612	76.0518	-1.1073	-1.03569	0.601126	2.25764	A_23_P2895
ADAM21	Homo sapiens ADAM metallopeptidase domain 21 (ADAM21), mRNA [NM_003813]	25.6194	8.04245	37.3217	125.494	0	-1.36958	-1.3224	0.482122	A_23_P367420
ADAM22	Homo sapiens ADAM metallopeptidase domain 22 (ADAM22), transcript variant 1, mRNA [NM_021723]	23.6503	22.2681	342.627	104.394	-0.197938	0.0171309	1.79359	0.133979	A_23_P215625
ADAM22	Homo sapiens ADAM metallopeptidase domain 22, mRNA (cDNA clone IMAGE:5278621), complete cds. [BC036029]	3.15595	4.56646	3.13136	3.983	1.03297	1.86792	-0.843488	-0.44143	A_24_P929899
ADAM22	Homo sapiens ADAM metallopeptidase domain 22 (ADAM22), transcript variant 1, mRNA [NM_021723]	10.8294	46.5466	323.437	28.3586	-0.146028	2.25964	2.88925	-0.567383	A_24_P355006
ADAM22	Homo sapiens ADAM metallopeptidase domain 22 (ADAM22), transcript variant 5, mRNA [NM_021721]	8.09117	7.87241	142.726	42.2199	-0.286788	-0.0243855	1.98878	0.286527	A_24_P243741
ADAM23	Homo sapiens ADAM metallopeptidase domain 23 (ADAM23), mRNA [NM_003812]	4.91769	8.40876	70.4716	116.548	-0.173483	0.902377	1.80233	2.58313	A_24_P37300
ADAM23	Homo sapiens ADAM metallopeptidase domain 23 (ADAM23), mRNA [NM_003812]	718.692	434.126	1693.47	1685.83	1.75935	1.33404	1.13071	1.17918	A_23_P351667
ADAM28	Homo sapiens ADAM metallopeptidase domain 28 (ADAM28), transcript variant 3, mRNA [NM_021777]	2.18236	1.92989	3.49968	30.4175	0.298942	0.423518	-0.884903	2.28969	A_23_P10356
ADAM28	Homo sapiens ADAM metallopeptidase domain 28 (ADAM28), transcript variant 1, mRNA [NM_014265]	1.9371	2.65685	17.8933	22.0961	-0.564167	0.193594	0.778099	1.13747	A_23_P21758
ADAM29	Homo sapiens ADAM metallopeptidase domain 29 (ADAM29), transcript variant 1, mRNA [NM_014269]	2.10256	1.78861	4.77218	5.35394	0.203133	0.271766	-0.479546	-0.258602	A_23_P95536
ADAM30	Homo sapiens ADAM metallopeptidase domain 30 (ADAM30), mRNA [NM_021794]	6.2323	2.75675	3.56149	4.43612	1.30881	0.433958	-1.36365	-0.991848	A_23_P126363
ADAM32	Homo sapiens ADAM metallopeptidase domain 32 (ADAM32), mRNA [NM_145004]	4.51689	4.00172	56.1437	169.987	-0.995627	-0.86839	0.774917	2.42814	A_23_P44665
ADAM33	Homo sapiens ADAM metallopeptidase domain 33 (ADAM33), transcript variant 1, mRNA [NM_025220]	312.664	287.49	76.0576	159.344	3.84447	4.02531	-0.0601578	1.06181	A_23_P210731
ADAM33	Homo sapiens ADAM metallopeptidase domain 33 (ADAM33), transcript variant 1, mRNA [NM_025220]	1572.59	1364.5	142.072	392.566	5.12787	5.22504	-0.205761	1.31554	A_23_P502343
ADAM5	Homo sapiens ADAM metallopeptidase domain 5, pseudogene (ADAM5), non-coding RNA [NR_001448]	2.11327	1.82168	3.58254	4.43619	0.291537	0.379276	-0.812132	-0.448801	A_24_P230026
ADAM6	Homo sapiens ADAM metallopeptidase domain 6, pseudogene (ADAM6), non-coding RNA [NR_002224]	8.07729	7.47938	18.4491	16.7757	0.498955	0.689949	-0.174616	-0.256803	A_24_P592260
ADAM6	Homo sapiens ADAM metallopeptidase domain 6, pseudogene (ADAM6), non-coding RNA [NR_002224]	1.97612	1.73368	3.09568	3.88877	0.451008	0.564118	-0.766586	-0.382534	A_23_P54861
ADAM7	Homo sapiens ADAM metallopeptidase domain 7 (ADAM7), mRNA [NM_003817]	2.12138	1.78664	7.68037	16.9731	0.191542	0.245736	0.182541	1.38153	A_23_P94296
ADAM8	Homo sapiens ADAM metallopeptidase domain 8 (ADAM8), transcript variant 1, mRNA [NM_001109]	403.595	382.452	1166.64	2376.53	-1.01586	-0.791543	-1.34965	-0.268172	A_24_P300777
ADAM9	Homo sapiens ADAM metallopeptidase domain 9 (ADAM9), transcript variant 1, mRNA [NM_003816]	152.549	115.377	776.219	698.837	-0.238643	-0.339613	0.243374	0.146857	A_32_P80678
ADAM9	Homo sapiens ADAM metallopeptidase domain 9 (ADAM9), transcript variant 1, mRNA [NM_003816]	5030.77	2874.31	5710.26	7570.49	1.61282	1.1072	-0.0695801	0.392241	A_23_P72643
ADAMDEC1	Homo sapiens ADAM-like, decysin 1 (ADAMDEC1), transcript variant 1, mRNA [NM_014479]	14.7703	5.15225	13.6448	28.3934	1.75399	0.536511	-0.225542	0.886656	A_23_P256425
ADAMTS1	Homo sapiens ADAM metallopeptidase with thrombospondin type 1 motif, 1 (ADAMTS1), mRNA [NM_006988]	3278.3	2177.41	1349.21	16612	2.3053	2.01691	-0.840714	2.83632	A_23_P211039
ADAMTS1	Homo sapiens ADAM metallopeptidase with thrombospondin type 1 motif, 1 (ADAMTS1), mRNA [NM_006988]	4449.21	3349.99	1060.41	12848.9	2.91889	2.81144	-1.01522	2.63873	A_23_P342275
ADAMTS10	Homo sapiens ADAM metallopeptidase with thrombospondin type 1 motif, 10 (ADAMTS10), transcript variant 1, mRNA [NM_030957]	4.88658	13.4591	36.4645	37.614	-0.956402	0.807234	0.0780177	0.177785	A_23_P108314
ADAMTS12	Homo sapiens ADAM metallopeptidase with thrombospondin type 1 motif, 12 (ADAMTS12), mRNA [NM_030955]	333.439	272.14	1645.95	1157.42	-0.483071	-0.474198	-0.0448189	-0.497845	A_32_P103220
ADAMTS12	Homo sapiens ADAM metallopeptidase with thrombospondin type 1 motif, 12 (ADAMTS12), mRNA [NM_030955]	5.97617	3.13228	14.695	16.6066	-0.34266	-0.972724	-0.909806	-0.678384	A_23_P44648
ADAMTS12	ADAM metallopeptidase with thrombospondin type 1 motif, 12 [Source:HGNC Symbol;Acc:14605] [ENST00000504830]	7.02949	6.74409	127.494	117.562	-2.35358	-2.11143	-0.0378852	-0.0999088	A_24_P928852
ADAMTS13	Homo sapiens ADAM metallopeptidase with thrombospondin type 1 motif, 13 (ADAMTS13), transcript variant 1, mRNA [NM_139025]	435.977	794.725	1074.83	966.627	0.624306	1.79246	0.0609083	-0.0371723	A_23_P393645
ADAMTS13	Homo sapiens ADAM metallopeptidase with thrombospondin type 1 motif, 13 (ADAMTS13), transcript variant 2, mRNA [NM_139027]	16.1507	30.5126	68.5427	60.0981	-0.0747113	1.14504	0.145518	0.0108256	A_24_P172304
ADAMTS13	Homo sapiens ADAM metallopeptidase with thrombospondin type 1 motif, 13 (ADAMTS13), transcript variant 2, mRNA [NM_139027]	9.76792	13.0419	98.3631	79.7109	-1.02203	-0.303053	0.444791	0.196442	A_24_P923832
ADAMTS14	Homo sapiens ADAM metallopeptidase with thrombospondin type 1 motif, 14 (ADAMTS14), transcript variant 1, mRNA [NM_139155]	8.03633	8.69252	19.8606	35.7313	0.492228	0.907412	-0.0676465	0.834622	A_23_P202558
ADAMTS14	Homo sapiens ADAM metallopeptidase with thrombospondin type 1 motif, 14 (ADAMTS14), transcript variant 1, mRNA [NM_139155]	232.839	128.413	41.3229	759.086	3.19222	2.63563	-1.16728	3.08696	A_24_P275073
ADAMTS15	Homo sapiens ADAM metallopeptidase with thrombospondin type 1 motif, 15 (ADAMTS15), mRNA [NM_139055]	7.62473	8.23168	60.6432	13.5257	0.439821	0.852267	1.56623	-0.543422	A_23_P52749
ADAMTS16	Homo sapiens ADAM metallopeptidase with thrombospondin type 1 motif, 16 (ADAMTS16), mRNA [NM_139056]	1.95381	1.75484	10.1133	20.3454	-3.59184	-3.44484	-3.08512	-2.02168	A_23_P41629
ADAMTS16	Homo sapiens ADAM metallopeptidase with thrombospondin type 1 motif, 16 (ADAMTS16), mRNA [NM_139056]	2.67124	2.75142	6.02018	4.76112	-1.20408	-0.859473	-1.89697	-2.18048	A_24_P69084
ADAMTS17	Homo sapiens ADAM metallopeptidase with thrombospondin type 1 motif, 17 (ADAMTS17), mRNA [NM_139057]	9.41577	6.24128	26.1584	11.6084	0.803952	0.512661	0.412899	-0.704218	A_23_P112916
ADAMTS18	Homo sapiens ADAM metallopeptidase with thrombospondin type 1 motif, 18 (ADAMTS18), mRNA [NM_199355]	3.82424	6.87046	3.43946	29.2862	-0.550049	0.597129	-2.56822	0.576738	A_32_P34844
ADAMTS18	Homo sapiens ADAM metallopeptidase with thrombospondin type 1 motif, 18 (ADAMTS18), mRNA [NM_199355]	4.04443	1.87214	3.2566	4.93163	0.893806	0.0845056	-1.28394	-0.630253	A_23_P15004
ADAMTS19	Homo sapiens ADAM metallopeptidase with thrombospondin type 1 motif, 19 (ADAMTS19), mRNA [NM_133638]	9.46189	14.6252	3.53892	11.8503	2.02317	2.95337	-1.26083	0.53771	A_23_P259851
ADAMTS2	Homo sapiens mRNA for procollagen I-N proteinase. [AJ003125]	1265.95	302.119	242.434	1774.63	3.26351	1.49843	-0.986216	1.94062	A_23_P213615
ADAMTS2	Homo sapiens ADAM metallopeptidase with thrombospondin type 1 motif, 2 (ADAMTS2), transcript variant 2, mRNA [NM_021599]	591.939	229.718	689.274	958.291	1.65995	0.59631	0.0144005	0.544777	A_24_P251866
ADAMTS2	Homo sapiens ADAM metallopeptidase with thrombospondin type 1 motif, 2 (ADAMTS2), transcript variant 2, mRNA [NM_021599]	259.38	119.836	254.596	395.238	1.80459	0.992525	-0.0874448	0.602056	A_23_P321307
ADAMTS20	ADAM metallopeptidase with thrombospondin type 1 motif, 20 [Source:HGNC Symbol;Acc:17178] [ENST00000395541]	5.37595	5.26389	3.27007	3.92919	1.53304	1.8046	-1.04933	-0.729432	A_24_P357916
ADAMTS20	Homo sapiens ADAM metallopeptidase with thrombospondin type 1 motif, 20 (ADAMTS20), mRNA [NM_025003]	2.22777	3.90904	3.52168	4.35162	0.303508	1.41667	-0.901005	-0.540728	A_23_P420359
ADAMTS3	Homo sapiens ADAM metallopeptidase with thrombospondin type 1 motif, 3 (ADAMTS3), mRNA [NM_014243]	52.716	76.9237	146.167	85.798	-0.597779	0.249353	-0.991652	-1.70526	A_24_P140405
ADAMTS3	Homo sapiens ADAM metallopeptidase with thrombospondin type 1 motif, 3 (ADAMTS3), mRNA [NM_014243]	6.15292	8.12837	13.6395	6.12528	-0.206563	0.497077	-0.923297	-2.02325	A_23_P144521
ADAMTS4	Homo sapiens ADAM metallopeptidase with thrombospondin type 1 motif, 4 (ADAMTS4), mRNA [NM_005099]	715.859	758.863	13.8356	5249.33	4.7334	5.11951	-2.82499	5.7976	A_23_P360754
ADAMTS4	ADAM metallopeptidase with thrombospondin type 1 motif, 4 [Source:HGNC Symbol;Acc:220] [ENST00000367995]	1.8504	1.75666	5.04396	29.2938	-0.0763912	0.150554	-0.494851	2.09811	A_24_P128163
ADAMTS5	Homo sapiens ADAM metallopeptidase with thrombospondin type 1 motif, 5 (ADAMTS5), mRNA [NM_007038]	11385.4	20275.1	2290.05	7790.76	2.87974	4.01422	-1.29916	0.522213	A_23_P40415
ADAMTS6	Homo sapiens ADAM metallopeptidase with thrombospondin type 1 motif, 6 (ADAMTS6), mRNA [NM_197941]	59.3808	85.9083	34.4347	813.109	-0.744153	0.0905938	-3.39547	1.22104	A_23_P213319
ADAMTS6	Homo sapiens ADAM metallopeptidase with thrombospondin type 1 motif, 6 (ADAMTS6), mRNA [NM_197941]	2.05207	3.0048	3.12228	32.3879	-1.27623	-0.424091	-2.53588	0.89389	A_24_P334456
ADAMTS7	Homo sapiens ADAM metallopeptidase with thrombospondin type 1 motif, 7 (ADAMTS7), mRNA [NM_014272]	10601.1	2308.88	13168.9	13444.1	2.19638	0.299376	0.644126	0.728948	A_23_P11005
ADAMTS7	ADAM metallopeptidase with thrombospondin type 1 motif, 7 [Source:HGNC Symbol;Acc:223] [ENST00000568712]	1.92943	1.73322	3.15415	3.94129	0.187617	0.334849	-0.96848	-0.592075	A_23_P37632
ADAMTS7	ADAM metallopeptidase with thrombospondin type 1 motif, 7 [Source:HGNC Symbol;Acc:223] [ENST00000568712]	7.00123	1.80271	67.8198	426.662	-1.09465	-2.75014	0.316201	3.02451	A_23_P37624
ADAMTS8	Homo sapiens ADAM metallopeptidase with thrombospondin type 1 motif, 8 (ADAMTS8), mRNA [NM_007037]	3772.42	80.7867	57.0107	5.37947	10.3314	5.08809	2.41808	-0.932624	A_23_P86956
ADAMTS9	ADAM metallopeptidase with thrombospondin type 1 motif, 9 [Source:HGNC Symbol;Acc:13202] [ENST00000475557]	2.29435	10.4836	2.99293	144.413	-1.52924	0.964684	-3.01094	2.63654	A_23_P33356
ADAMTS9	Homo sapiens ADAM metallopeptidase with thrombospondin type 1 motif, 9 (ADAMTS9), mRNA [NM_182920]	1.92326	1.72756	3.37538	214.551	-0.436373	-0.289246	-1.49005	4.55506	A_23_P147423
ADAMTS9	Homo sapiens ADAM metallopeptidase with thrombospondin type 1 motif, 9 (ADAMTS9), mRNA [NM_182920]	6.67013	30.2277	3.23013	2369.02	-2.46249	0.0195413	-5.37379	4.19968	A_32_P196263
ADAMTS9-AS2	Homo sapiens cDNA FLJ25194 fis, clone REC04095. [AK057923]	6.21836	11.5644	5.02497	54.6767	0.181795	1.37883	-1.9908	1.50793	A_24_P756494
ADAMTSL1	Homo sapiens ADAMTS-like 1 (ADAMTSL1), transcript variant 4, mRNA [NM_001040272]	55.0284	26.2314	53.9648	473.834	1.00238	0.23544	-0.890961	2.29832	A_24_P283635
ADAMTSL1	Homo sapiens ADAMTS-like 1 (ADAMTSL1), transcript variant 2, mRNA [NM_052866]	115.195	130.476	6.37296	800.632	1.03887	1.52053	-5.00227	2.02575	A_23_P312415
ADAMTSL1	ADAMTS-like 1 [Source:HGNC Symbol;Acc:14632] [ENST00000380566]	13.3631	20.3661	3.25851	66.6243	1.36951	2.27937	-2.53164	1.87711	A_23_P348304
ADAMTSL1	Homo sapiens ADAMTS-like 1 (ADAMTSL1), transcript variant 4, mRNA [NM_001040272]	821.68	608.929	224.207	6698.95	0.0388269	-0.0915289	-3.70009	1.25593	A_23_P342138
ADAMTSL2	Homo sapiens ADAMTS-like 2 (ADAMTSL2), transcript variant 1, mRNA [NM_014694]	5.10369	3.53246	16.7429	18.9536	-0.749541	-0.978462	-0.900783	-0.666867	A_23_P20697
ADAMTSL3	Homo sapiens ADAMTS-like 3 (ADAMTSL3), mRNA [NM_207517]	5.30118	7.06788	37.8257	12.922	-1.7917	-1.07479	-0.821899	-2.31644	A_23_P308974
ADAMTSL3	Homo sapiens ADAMTS-like 3 (ADAMTSL3), mRNA [NM_207517]	9.44782	6.83807	74.8114	12.8979	-1.43431	-1.59876	-0.314286	-2.79541	A_23_P43940
ADAMTSL3	Homo sapiens ADAMTS-like 3 (ADAMTSL3), mRNA [NM_207517]	2.25829	1.95591	6.72242	4.31552	-0.0945525	0	-0.385982	-0.970437	A_24_P400842
ADAMTSL4	Homo sapiens ADAMTS-like 4 (ADAMTSL4), transcript variant 1, mRNA [NM_019032]	85.8492	65.5513	19.7305	130.627	1.6582	1.57097	-2.32836	0.45359	A_23_P115011
ADAMTSL4	Homo sapiens cDNA FLJ13544 fis, clone PLACE1006815. [AK023606]	1.93436	1.74115	20.478	11.873	-0.906995	-0.756865	0.631974	-0.0994315	A_24_P62833
ADAMTSL5	Homo sapiens ADAMTS-like 5 (ADAMTSL5), mRNA [NM_213604]	22.6112	16.5122	79.1015	28.5663	0.885052	0.733493	0.826539	-0.587859	A_24_P315821
ADAMTSL5	Homo sapiens ADAMTS-like 5 (ADAMTSL5), mRNA [NM_213604]	125.272	59.2535	524.099	4.18288	0.981795	0.203652	1.18139	-5.73281	A_24_P22939
ADAMTSL5	Homo sapiens ADAMTS-like 5 (ADAMTSL5), mRNA [NM_213604]	199.644	70.1988	439.811	156.521	1.92106	0.715093	1.19534	-0.240206	A_23_P5241
ADAP1	Homo sapiens ArfGAP with dual PH domains 1 (ADAP1), transcript variant 1, mRNA [NM_006869]	27.009	13.4429	161.374	40.2229	-0.681919	-1.38657	0.0317988	-1.91753	A_23_P145865
ADAP2	Homo sapiens ArfGAP with dual PH domains 2 (ADAP2), mRNA [NM_018404]	69.274	44.9754	34.5595	82.5657	0.32123	0	-2.54718	-1.23573	A_23_P49816
ADAP2	Homo sapiens ArfGAP with dual PH domains 2 (ADAP2), mRNA [NM_018404]	116.145	99.9838	65.3768	183.889	0.162214	0.248005	-2.53203	-0.985062	A_24_P373562
ADAR	Homo sapiens adenosine deaminase, RNA-specific (ADAR), transcript variant 1, mRNA [NM_001111]	53.4632	66.1548	376.12	210.688	-0.272746	0.3365	0.676651	-0.10444	A_23_P200439
ADAR	Homo sapiens adenosine deaminase, RNA-specific (ADAR), transcript variant 1, mRNA [NM_001111]	7172.91	5437.57	22668.5	14349.2	0.433314	0.335667	0.228197	-0.376535	A_24_P362317
ADARB1	Homo sapiens adenosine deaminase, RNA-specific, B1 (ADARB1), transcript variant 1, mRNA [NM_001112]	603.529	629.055	10623	1667.9	-1.48378	-1.12208	0.788663	-1.82743	A_23_P211207
ADARB1	Homo sapiens adenosine deaminase, RNA-specific, B1 (ADARB1), transcript variant 2, mRNA [NM_015833]	6.88066	7.42324	254.842	27.1903	-1.25148	-0.840035	2.09425	-1.0792	A_23_P361336
ADARB1	adenosine deaminase, RNA-specific, B1 [Source:HGNC Symbol;Acc:226] [ENST00000460734]	12.2639	8.27809	218.395	11.3162	-1.03162	-1.29672	1.25766	-2.95783	A_24_P936556
ADARB2	Homo sapiens adenosine deaminase, RNA-specific, B2 (non-functional) (ADARB2), mRNA [NM_018702]	2.14845	4.42184	5.94483	4.34637	-0.026691	1.31661	-0.423527	-0.82036	A_23_P86751
ADARB2	Homo sapiens adenosine deaminase, RNA-specific, B2 (non-functional) (ADARB2), mRNA [NM_018702]	2.27766	2.02483	6.37153	4.34982	0.146664	0.27886	-0.234423	-0.730117	A_23_P75355
ADARB2-AS1	Homo sapiens ADARB2 antisense RNA 1 (ADARB2-AS1), long non-coding RNA [NR_033387]	2.04232	1.81685	3.38651	3.95594	0.249551	0.382729	-0.886035	-0.606825	A_32_P29954
ADAT1	Homo sapiens adenosine deaminase, tRNA-specific 1 (ADAT1), transcript variant 1, mRNA [NM_012091]	589.923	598.246	2253.66	1132.33	0.0529337	0.375093	0.121425	-0.816554	A_23_P141100
ADAT1	Homo sapiens adenosine deaminase, tRNA-specific 1 (ADAT1), transcript variant 1, mRNA [NM_012091]	245.625	153.307	880.942	426.974	0.378087	0	0.355498	-0.634408	A_24_P48139
ADAT2	Homo sapiens adenosine deaminase, tRNA-specific 2 (ADAT2), transcript variant 1, mRNA [NM_182503]	133.924	138.178	637.448	504.585	-0.347059	0	0.0386567	-0.243564	A_23_P134014
ADAT2	Homo sapiens adenosine deaminase, tRNA-specific 2 (ADAT2), transcript variant 1, mRNA [NM_182503]	219.586	271.962	395.065	584.388	0.0776758	0.688238	-0.9402	-0.320372	A_24_P186204
ADAT3	Homo sapiens adenosine deaminase, tRNA-specific 3 (ADAT3), mRNA [NM_138422]	35.8082	35.3341	161.019	126.573	-0.103506	0.17921	0.200186	-0.0920801	A_24_P82848
ADCK1	Homo sapiens aarF domain containing kinase 1 (ADCK1), transcript variant 1, mRNA [NM_020421]	70.1339	77.7908	230.376	221.728	0.38697	0.838403	0.237598	0.23739	A_23_P25945
ADCK2	Homo sapiens aarF domain containing kinase 2 (ADCK2), mRNA [NM_052853]	110.755	133.195	921.283	358.96	-0.63289	-0.0647774	0.558205	-0.746626	A_24_P291978
ADCK2	Homo sapiens aarF domain containing kinase 2 (ADCK2), mRNA [NM_052853]	525.978	412.294	4345.32	1899.86	-0.986011	-1.03539	0.1952	-0.94338	A_24_P283395
ADCK3	Homo sapiens aarF domain containing kinase 3 (ADCK3), mRNA [NM_020247]	473.159	271.129	1150.59	591.993	0.194205	-0.307193	-0.388997	-1.29273	A_23_P85598
ADCK4	Homo sapiens aarF domain containing kinase 4 (ADCK4), transcript variant 1, mRNA [NM_024876]	74.9465	63.8546	264.215	132.364	0.0473995	0.118276	0	-0.942213	A_23_P208400
ADCK4	aarF domain containing kinase 4 [Source:HGNC Symbol;Acc:19041] [ENST00000601451]	3.32412	4.77329	31.4928	8.26698	-0.794208	0.0297508	0.584594	-1.29001	A_24_P16592
ADCK5	Homo sapiens aarF domain containing kinase 5 (ADCK5), mRNA [NM_174922]	317.738	349.237	4040.37	1283.55	-1.12225	-0.683933	0.681153	-0.918199	A_23_P94365
ADCY1	Homo sapiens adenylate cyclase 1 (brain) (ADCY1), transcript variant 1, mRNA [NM_021116]	3.12208	1.73152	11.3295	4.3846	0.259256	-0.289265	0.253577	-1.06099	A_23_P21002
ADCY1	Homo sapiens adenylate cyclase 1 (brain) (ADCY1), transcript variant 1, mRNA [NM_021116]	1.97499	1.71007	633.164	223.802	-0.816588	-0.722429	5.64283	4.19746	A_24_P577694
ADCY10	Homo sapiens adenylate cyclase 10 (soluble) (ADCY10), transcript variant 1, mRNA [NM_018417]	4.45227	3.55973	11.0992	4.38537	0.988757	0.967928	0.441424	-0.843271	A_23_P126313
ADCY10P1	Homo sapiens adenylate cyclase 10 (soluble) pseudogene 1 (ADCY10P1), non-coding RNA [NR_026938]	5.30343	12.0773	52.196	151.086	-0.81845	0.670795	0.615314	2.20366	A_24_P303420
ADCY2	Homo sapiens adenylate cyclase 2 (brain) (ADCY2), mRNA [NM_020546]	4.347	4.76567	3.0844	3.87987	1.38172	1.81633	-0.978486	-0.592477	A_32_P405973
ADCY2	Homo sapiens adenylate cyclase 2 (brain) (ADCY2), mRNA [NM_020546]	2.16424	1.84396	7.85678	62.2689	0.00509882	0.075994	0	3.04149	A_23_P33539
ADCY3	Homo sapiens adenylate cyclase 3 (ADCY3), mRNA [NM_004036]	4962.81	1485.25	27688.3	10253.2	-0.0718794	-1.51038	0.542993	-0.835215	A_23_P67864
ADCY4	Homo sapiens adenylate cyclase 4 (ADCY4), transcript variant 2, mRNA [NM_139247]	19.2826	8.8456	14.0557	79.5884	1.74656	0.924243	-0.574754	1.98164	A_23_P381261
ADCY5	Homo sapiens adenylate cyclase 5 (ADCY5), transcript variant 1, mRNA [NM_183357]	22.9197	1.81674	7.2778	35.7774	2.59066	-0.764558	-0.929534	1.42293	A_23_P136623
ADCY5	Homo sapiens adenylate cyclase 5 (ADCY5), transcript variant 1, mRNA [NM_183357]	1.95112	1.74284	20.271	4.01616	0.286317	0.425401	1.79818	-0.482357	A_24_P919249
ADCY6	Homo sapiens adenylate cyclase 6 (ADCY6), transcript variant 1, mRNA [NM_015270]	446.877	473.361	2323.46	2062.52	0.194848	0.579859	0.707994	0.591118	A_23_P501547
ADCY7	Homo sapiens adenylate cyclase 7 (ADCY7), transcript variant 1, mRNA [NM_001114]	231.695	117.835	1917.94	1964.39	0.367337	-0.306177	1.55142	1.64093	A_24_P416177
ADCY7	Homo sapiens adenylate cyclase 7 (ADCY7), transcript variant 1, mRNA [NM_001114]	210.962	108.302	794.669	521.743	0.402066	-0.257916	0.450257	-0.101768	A_23_P106945
ADCY8	Homo sapiens adenylate cyclase 8 (brain) (ADCY8), mRNA [NM_001115]	1.93474	6.56779	3.15242	76.8003	0.441854	2.50707	-0.719002	3.94257	A_23_P169993
ADCY9	Homo sapiens adenylate cyclase 9 (ADCY9), mRNA [NM_001116]	84.7835	34.9325	162.878	153.681	0.834326	-0.142942	-0.088912	-0.117774	A_23_P49443
ADCY9	Homo sapiens adenylate cyclase 9 (ADCY9), mRNA [NM_001116]	808.635	608.331	6087.09	2856.99	0.189575	0.0808897	1.23659	0.200325	A_24_P935103
ADCYAP1	Homo sapiens adenylate cyclase activating polypeptide 1 (pituitary) (ADCYAP1), transcript variant 2, mRNA [NM_001117]	5.34498	5.82827	822.895	4.71791	-3.72966	-3.30283	1.67154	-5.71988	A_24_P335781
ADCYAP1	Homo sapiens adenylate cyclase activating polypeptide 1 (pituitary) (ADCYAP1), transcript variant 2, mRNA [NM_001117]	1.98823	1.72942	759.29	5.3071	-4.78308	-4.68232	1.92877	-5.17682	A_23_P38712
ADCYAP1R1	Homo sapiens adenylate cyclase activating polypeptide 1 (pituitary) receptor type I (ADCYAP1R1), transcript variant 3, mRNA [NM_001118]	1.90739	1.68961	31.7113	19.2634	-0.533505	-0.406467	1.65664	0.992497	A_23_P157109
ADD1	Homo sapiens adducin 1 (alpha) (ADD1), transcript variant 2, mRNA [NM_014189]	109.341	151.519	275.058	326.642	0.407997	1.18062	-0.126271	0.176693	A_24_P100742
ADD1	Homo sapiens adducin 1 (alpha) (ADD1), transcript variant 5, mRNA [NM_001286645]	13.9505	23.4526	69.0297	67.3375	-1.05633	-0.00495338	-0.614608	-0.595426	A_24_P109272
ADD1	Homo sapiens adducin 1 (alpha) (ADD1), transcript variant 1, mRNA [NM_001119]	277.143	209.613	249.866	368.081	1.18638	1.08543	-0.82827	-0.214409	A_24_P117866
ADD1	Homo sapiens adducin 1 (alpha) (ADD1), transcript variant 4, mRNA [NM_176801]	15080.1	10771.9	22968.8	44185	0.419801	0.236377	-0.83835	0.160522	A_23_P212768
ADD2	adducin 2 (beta) [Source:HGNC Symbol;Acc:244] [ENST00000264436]	30.4333	1.74483	3041.22	91.0624	0.228983	-3.59357	5.00666	0	A_32_P86533
ADD2	Homo sapiens adducin 2 (beta) (ADD2), transcript variant 2, mRNA [NM_017482]	1.87805	23.4173	57.8018	3.84909	0.140767	4.08298	3.2194	-0.634138	A_23_P317636
ADD2	Homo sapiens adducin 2 (beta) (ADD2), transcript variant 4, mRNA [NM_017488]	1.87707	2.7647	666.725	20.4797	-0.469778	0.390808	6.13751	1.16768	A_23_P421436
ADD2	Homo sapiens adducin 2 (beta) (ADD2), transcript variant 4, mRNA [NM_017488]	11.9751	4.77636	1242.54	44.2131	-0.258807	-1.28292	4.57312	-0.184559	A_23_P209856
ADD3	Homo sapiens adducin 3 (gamma) (ADD3), transcript variant 1, mRNA [NM_016824]	1682.58	1399.6	1824.29	11627.7	1.09806	1.13435	-0.650452	2.0767	A_23_P202435
ADD3	Homo sapiens adducin 3 (gamma) (ADD3), transcript variant 1, mRNA [NM_016824]	2436.88	4419.49	3464.37	19705.6	-0.0583258	1.10246	-1.41595	1.14699	A_24_P90097
ADD3-AS1	Homo sapiens clone DT1P1A11 mRNA, CAG repeat region. [U92992]	1.85925	4.7415	3.6767	28.99	0.124354	1.77692	-0.757133	2.27693	A_24_P519818
ADGB	Homo sapiens androglobin (ADGB), mRNA [NM_024694]	2.17904	1.91903	3.48415	3.96315	0.445952	0.564588	-0.742111	-0.501276	A_23_P70643
ADH1A	Homo sapiens alcohol dehydrogenase 1A (class I), alpha polypeptide (ADH1A), mRNA [NM_000667]	148.906	380.688	29.745	12.7043	6.33072	7.98687	2.14186	0.969528	A_23_P58359
ADH1A	Homo sapiens alcohol dehydrogenase 1A (class I), alpha polypeptide (ADH1A), mRNA [NM_000667]	138.541	249.057	13.7827	4.52278	6.17616	7.32427	0.981601	-0.570988	A_24_P291658
ADH1B	alcohol dehydrogenase 1B (class I), beta polypeptide [Source:HGNC Symbol;Acc:250] [ENST00000305046]	8.53522	17.5823	3.13575	3.86243	2.48466	3.82923	-0.82513	-0.46944	A_24_P940469
ADH1C	Homo sapiens alcohol dehydrogenase 1C (class I), gamma polypeptide (ADH1C), mRNA [NM_000669]	412.115	635.829	73.7497	52.1228	5.5821	6.50964	1.23458	0.788853	A_23_P81158
ADH4	Homo sapiens alcohol dehydrogenase 4 (class II), pi polypeptide (ADH4), mRNA [NM_000670]	3.94952	3.55214	4.19027	42.3312	1.04169	1.19065	-0.738116	2.65348	A_23_P30098
ADH5	Homo sapiens alcohol dehydrogenase 5 (class III), chi polypeptide (ADH5), mRNA [NM_000671]	1393.89	928.469	4703.16	6253.92	0.522409	0.238165	0.411744	0.877866	A_23_P18692
ADH5	Homo sapiens alcohol dehydrogenase 5 (class III), chi polypeptide (ADH5), mRNA [NM_000671]	8431.5	5185.9	18681.3	16993.1	0.941695	0.542448	0.224255	0.142593	A_32_P198399
ADH5	Homo sapiens alcohol dehydrogenase 5 (class III), chi polypeptide (ADH5), mRNA [NM_000671]	3772.24	2305.58	3954.41	4895.53	1.81499	1.40664	0.0178528	0.380845	A_24_P260346
ADH6	Homo sapiens alcohol dehydrogenase 6 (class V) (ADH6), transcript variant 1, mRNA [NM_001102470]	5.18252	6.219	3.35568	3.9167	1.13364	1.69861	-1.35859	-1.08056	A_24_P25550
ADH6	Homo sapiens alcohol dehydrogenase 6 (class V) (ADH6), transcript variant 2, mRNA [NM_000672]	3.31903	4.28038	33.6238	6.6337	0.932496	1.60142	2.40797	0.121362	A_23_P41498
ADH7	Homo sapiens alcohol dehydrogenase 7 (class IV), mu or sigma polypeptide (ADH7), transcript variant 2, mRNA [NM_000673]	2.00203	1.74045	4.06285	4.87219	0.23116	0.331101	-0.612989	-0.295921	A_23_P92562
ADHFE1	Homo sapiens alcohol dehydrogenase, iron containing, 1 (ADHFE1), mRNA [NM_144650]	195.271	264.359	213.955	150.665	1.67946	2.41843	-0.0538836	-0.504855	A_23_P157569
ADI1	Homo sapiens acireductone dioxygenase 1 (ADI1), mRNA [NM_018269]	1613	1195.2	3733.09	4471.02	0.397414	0.266867	-0.257144	0.0580826	A_32_P52911
ADI1	Homo sapiens acireductone dioxygenase 1 (ADI1), mRNA [NM_018269]	1532.52	1027.52	4122.11	4856.08	0.197473	-0.0773144	-0.240226	0.051177	A_23_P148162
ADI1	Homo sapiens acireductone dioxygenase 1 (ADI1), mRNA [NM_018269]	2770.96	2282.22	13515	17462.6	-0.757854	-0.735853	-0.336925	0.0877695	A_23_P148194
ADIG	Homo sapiens adipogenin (ADIG), mRNA [NM_001018082]	1.94351	1.72499	3.06558	3.88249	0.457907	0.587776	-0.749779	-0.353963	A_32_P423691
ADIPOQ	Homo sapiens adiponectin, C1Q and collagen domain containing (ADIPOQ), transcript variant 2, mRNA [NM_004797]	2.36931	2.20825	5.352	4.8138	0.391254	0.591641	-0.298313	-0.396222	A_23_P369237
ADIPOR1	Homo sapiens adiponectin receptor 1 (ADIPOR1), transcript variant 1, mRNA [NM_015999]	2478.19	1673.65	6738.19	7225.5	0.208634	-0.0557089	-0.21347	-0.0577431	A_23_P46627
ADIPOR2	Homo sapiens adiponectin receptor 2 (ADIPOR2), mRNA [NM_024551]	2753.16	1769.2	8135.73	4884.4	0.178671	-0.157372	-0.123324	-0.804423	A_23_P48121
ADIPOR2	Homo sapiens adiponectin receptor 2 (ADIPOR2), mRNA [NM_024551]	154.794	53.2847	484.08	203.2	0.762755	-0.47385	0.542478	-0.654879	A_24_P13376
ADIRF	Homo sapiens adipogenesis regulatory factor (ADIRF), mRNA [NM_006829]	28905.2	6481.9	45.7667	6824.09	3.9914	2.1365	-7.1766	0.098588	A_23_P161439
ADK	Homo sapiens adenosine kinase (ADK), transcript variant 1, mRNA [NM_001123]	1940.89	1424.04	6286.76	6345.29	0.0410442	-0.103736	-0.128535	-0.0601749	A_23_P112596
ADM	Homo sapiens adrenomedullin (ADM), mRNA [NM_001124]	22431.6	19325	19141.9	165782	1.25843	1.34532	-0.835542	2.33393	A_23_P127948
ADM2	Homo sapiens adrenomedullin 2 (ADM2), transcript variant 1, mRNA [NM_024866]	5.89547	4.74667	19.057	44.8176	0	-0.0107455	-0.172532	1.1162	A_24_P91780
ADM5	Homo sapiens adrenomedullin 5 (putative) (ADM5), mRNA [NM_001101340]	15.9363	9.48231	180.032	29.9471	-1.02826	-1.47533	0.604419	-1.92835	A_23_P27688
ADNP	Homo sapiens activity-dependent neuroprotector homeobox (ADNP), transcript variant 3, mRNA [NM_001282531]	1058.04	999.106	9201.61	2572.23	-0.739747	-0.520486	0.515568	-1.26831	A_24_P134319
ADNP	Homo sapiens activity-dependent neuroprotector homeobox (ADNP), transcript variant 1, mRNA [NM_015339]	4998.04	4128.48	17466.1	8761.77	0.344234	0.37043	0.284181	-0.656094	A_23_P254179
ADNP2	Homo sapiens ADNP homeobox 2 (ADNP2), mRNA [NM_014913]	287.617	223.186	2238.08	799.313	-0.283673	-0.347632	0.811191	-0.619248	A_23_P164468
ADO	Homo sapiens 2-aminoethanethiol (cysteamine) dioxygenase (ADO), mRNA [NM_032804]	47.2856	26.0066	643.714	1016.76	-1.11091	-1.67148	0.790865	1.50534	A_23_P202345
ADORA1	Homo sapiens adenosine A1 receptor (ADORA1), transcript variant 1, mRNA [NM_000674]	56.2204	23.3322	68.0215	103.013	0.630122	-0.3367	-0.960158	-0.30641	A_23_P74299
ADORA2A	Homo sapiens adenosine A2a receptor (ADORA2A), transcript variant 3, mRNA [NM_000675]	24.1117	69.6468	2188.33	292.715	-3.18384	-1.35157	1.45494	-1.39233	A_23_P109436
ADORA2A	Homo sapiens adenosine A2a receptor (ADORA2A), transcript variant 3, mRNA [NM_000675]	2.15352	16.2577	1127.36	102.882	-5.31348	-2.09518	1.85337	-1.54551	A_24_P237270
ADORA2A-AS1	Homo sapiens ADORA2A antisense RNA 1 (ADORA2A-AS1), transcript variant 1, long non-coding RNA [NR_028484]	6.14699	4.35914	7.85476	17.8392	0.273087	0.0791979	-1.2384	0	A_32_P18931
ADORA2A-AS1	Homo sapiens ADORA2A antisense RNA 1 (ADORA2A-AS1), transcript variant 2, long non-coding RNA [NR_028483]	5.76611	3.76465	46.7935	66.491	-0.558389	-0.871524	0.59707	1.15891	A_32_P225536
ADORA2B	Homo sapiens adenosine A2b receptor (ADORA2B), mRNA [NM_000676]	797.982	254.971	10231.6	3733.48	-1.24375	-2.58783	0.571599	-0.827843	A_23_P55477
ADORA3	Homo sapiens adenosine A3 receptor (ADORA3), transcript variant 2, mRNA [NM_000677]	1.86917	1.645	3.9215	4.45902	0.026577	0.144211	-0.769594	-0.529284	A_23_P137931
ADORA3	Homo sapiens adenosine A3 receptor (ADORA3), transcript variant 1, mRNA [NM_020683]	2.80222	9.62406	7.92973	6.16716	0.0850382	2.16706	-0.279439	-0.587115	A_23_P126540
ADPGK	Homo sapiens ADP-dependent glucokinase (ADPGK), transcript variant 1, mRNA [NM_031284]	1014.81	742.827	5438.36	4630.07	-0.159503	-0.307663	0.397288	0.22014	A_23_P14716
ADPRH	Homo sapiens ADP-ribosylarginine hydrolase (ADPRH), transcript variant 1, mRNA [NM_001125]	3.66376	6.64677	8.0415	48.794	-0.234306	0.926967	-0.965345	1.69081	A_23_P408070
ADPRHL1	Homo sapiens ADP-ribosylhydrolase like 1 (ADPRHL1), transcript variant 1, mRNA [NM_138430]	16.9572	9.23389	195.114	127.807	-1.43356	-2.0085	0.225614	-0.329741	A_23_P371145
ADPRHL1	Homo sapiens ADP-ribosylhydrolase like 1 (ADPRHL1), transcript variant 2, mRNA [NM_199162]	191.777	95.0449	1752.03	1548.59	-1.20327	-1.91407	0.123075	0	A_23_P48438
ADPRHL2	Homo sapiens ADP-ribosylhydrolase like 2 (ADPRHL2), mRNA [NM_017825]	951.53	964.583	5667.57	4269.97	-0.655521	-0.33392	0.0537109	-0.299803	A_23_P34568
ADPRM	PREDICTED: Homo sapiens ADP-ribose/CDP-alcohol diphosphatase, manganese-dependent (ADPRM), transcript variant X1, mRNA [XM_005256738]	20.4417	14.084	137.712	97.0382	-0.436851	-0.672366	0.450035	0	A_32_P209770
ADPRM	Homo sapiens ADP-ribose/CDP-alcohol diphosphatase, manganese-dependent (ADPRM), mRNA [NM_020233]	276.337	273.253	1421.04	1105.81	-0.321015	-0.0352621	0.176249	-0.130603	A_23_P55127
ADRA1A	Homo sapiens adrenoceptor alpha 1A (ADRA1A), transcript variant 4, mRNA [NM_033304]	6.09202	4.81524	13.0619	3.84688	0.977469	0.940104	0.212659	-1.49595	A_23_P8938
ADRA1B	Homo sapiens adrenoceptor alpha 1B (ADRA1B), mRNA [NM_000679]	7.96663	6.42266	26.72	34.4469	-0.77283	-0.781681	-0.89213	-0.470683	A_23_P21929
ADRA1B	Homo sapiens adrenoceptor alpha 1B (ADRA1B), mRNA [NM_000679]	460.547	170.7	43.3056	989.294	0.591461	-0.538475	-4.68444	-0.115675	A_23_P33326
ADRA1D	Homo sapiens adrenoceptor alpha 1D (ADRA1D), mRNA [NM_000678]	52.7417	37.7447	388.676	317.577	-0.185376	-0.366102	0.830997	0.594525	A_23_P131924
ADRA2A	Homo sapiens adrenoceptor alpha 2A (ADRA2A), mRNA [NM_000681]	2.47808	1.74479	37.4666	377.65	-2.05313	-2.25736	0	3.38837	A_23_P138706
ADRA2B	Homo sapiens adrenoceptor alpha 2B (ADRA2B), mRNA [NM_000682]	2.15197	1.81975	7.36558	4.31069	-0.076097	-0.0160656	-0.16613	-0.884021	A_23_P378926
ADRA2C	Homo sapiens adrenoceptor alpha 2C (ADRA2C), mRNA [NM_000683]	553.719	106.419	1334.81	3197.71	0.595766	-1.48168	0	1.31539	A_23_P256158
ADRB1	Homo sapiens adrenoceptor beta 1 (ADRB1), mRNA [NM_000684]	2.2626	1.93407	3.3562	4.15474	0.125039	0.200644	-1.17129	-0.808375	A_23_P52240
ADRB2	Homo sapiens adrenoceptor beta 2, surface (ADRB2), mRNA [NM_000024]	692.66	1394.58	152.598	93.4784	0.746506	2.05807	-3.30109	-3.95312	A_23_P145024
ADRB3	Homo sapiens adrenoceptor beta 3 (ADRB3), mRNA [NM_000025]	6.58011	5.20537	37.2853	26.7013	-0.346466	-0.38263	0.290782	-0.135928	A_23_P168993
ADRBK1	Homo sapiens adrenergic, beta, receptor kinase 1 (ADRBK1), mRNA [NM_001619]	221.082	238.445	794.727	320.465	0.285775	0.696797	0.266479	-0.988824	A_24_P326635
ADRBK2	Homo sapiens adrenergic, beta, receptor kinase 2 (ADRBK2), mRNA [NM_005160]	42.5593	20.3064	98.4331	70.8201	1.54125	0.775659	0.885746	0.465751	A_23_P251686
ADRBK2	Homo sapiens adrenergic, beta, receptor kinase 2 (ADRBK2), mRNA [NM_005160]	182	93.7157	525.15	271.801	0.927237	0.271605	0.590848	-0.304341	A_24_P378928
ADRM1	Homo sapiens adhesion regulating molecule 1 (ADRM1), transcript variant 1, mRNA [NM_007002]	3939.6	2375.99	11005.9	5423.57	0.427576	0	0.0445566	-0.921416	A_23_P68665
ADRM1	Homo sapiens adhesion regulating molecule 1 (ADRM1), transcript variant 1, mRNA [NM_007002]	5537.96	3604.67	14308.8	6984.06	0.433523	0.115983	-0.0621738	-1.04195	A_24_P305597
ADSL	Homo sapiens adenylosuccinate lyase (ADSL), transcript variant 1, mRNA [NM_000026]	833.153	681.857	4817.86	5379.58	-0.965904	-0.95307	-0.299344	-0.0852518	A_23_P155103
ADSS	Homo sapiens adenylosuccinate synthase (ADSS), mRNA [NM_001126]	113.258	135.561	817.362	803.828	-0.863893	-0.302619	0.122294	0.153197	A_23_P859
ADSS	Homo sapiens adenylosuccinate synthase (ADSS), mRNA [NM_001126]	1827.96	1935.05	3985.39	5156.77	-0.0217876	0.362299	-0.762478	-0.335741	A_23_P201432
ADSSL1	Homo sapiens adenylosuccinate synthase like 1 (ADSSL1), transcript variant 1, mRNA [NM_199165]	448.116	1408.97	1386.54	423.897	0.940311	2.89495	0.704681	-0.950034	A_23_P76823
ADTRP	Homo sapiens androgen-dependent TFPI-regulating protein (ADTRP), transcript variant 2, mRNA [NM_032744]	12.2405	52.2012	26.0206	2804.81	-1.8283	0.566073	-2.60548	4.20162	A_23_P156826
AEBP1	Homo sapiens AE binding protein 1 (AEBP1), mRNA [NM_001129]	1263.14	4287.57	46.3589	1096.04	2.0149	4.07999	-4.6183	0	A_23_P157299
AEBP1	Homo sapiens AE binding protein 1 (AEBP1), mRNA [NM_001129]	604.257	2756.76	17.1926	411.867	3.16602	5.6577	-3.83447	0.802847	A_23_P145916
AEBP2	Homo sapiens AE binding protein 2 (AEBP2), transcript variant 1, mRNA [NM_153207]	2959.18	2971.57	2257.95	3006.5	1.11155	1.41953	-1.14381	-0.675747	A_24_P18621
AEBP2	Homo sapiens AE binding protein 2 (AEBP2), transcript variant 1, mRNA [NM_153207]	192.052	191.057	277.273	428.568	0.601165	0.895618	-0.734198	-0.0509911	A_23_P116913
AEN	Homo sapiens apoptosis enhancing nuclease (AEN), mRNA [NM_022767]	365.543	716.903	1601.8	1562.82	0.0351648	1.30885	0.301572	0.321016	A_23_P206077
AES	Homo sapiens amino-terminal enhancer of split (AES), transcript variant 1, mRNA [NM_198969]	12606.2	12947.8	32797.7	30402.4	0.480959	0.821477	-0.0047617	-0.0591793	A_23_P165061
AES	Homo sapiens amino-terminal enhancer of split (AES), transcript variant 3, mRNA [NM_198970]	888.966	874.944	3186.11	2554.83	0.491166	0.770175	0.467586	0.204003	A_24_P416728
AES	Homo sapiens amino-terminal enhancer of split (AES), transcript variant 1, mRNA [NM_198969]	437.533	383.738	5265.2	4025.13	-0.60854	-0.495864	1.11531	0.782845	A_23_P341312
AFAP1	Homo sapiens actin filament associated protein 1 (AFAP1), transcript variant A, mRNA [NM_001134647]	187.381	167.566	784.095	1576.61	-0.796443	-0.655737	-0.596563	0.466154	A_23_P72387
AFAP1-AS1	Homo sapiens AFAP1 antisense RNA 1 (AFAP1-AS1), antisense RNA [NR_026892]	2.00006	1.75983	8.90602	7.07379	-1.32977	-1.21243	-1.04021	-1.31752	A_32_P178092
AFAP1-AS1	Homo sapiens AFAP1 antisense RNA 1 (AFAP1-AS1), antisense RNA [NR_026892]	1.93633	1.7349	3.40316	4.00089	-0.466756	-0.323286	-1.51838	-1.22995	A_23_P110276
AFAP1L1	Homo sapiens actin filament associated protein 1-like 1 (AFAP1L1), transcript variant 1, mRNA [NM_152406]	359.032	387.64	572.871	1821.74	-0.412553	0	-1.60363	0.120395	A_32_P167239
AFAP1L1	Homo sapiens actin filament associated protein 1-like 1 (AFAP1L1), transcript variant 1, mRNA [NM_152406]	13.5062	13.2497	105.795	48.971	-0.682351	-0.408068	0.42205	-0.634234	A_24_P248122
AFAP1L2	Homo sapiens actin filament associated protein 1-like 2 (AFAP1L2), transcript variant 2, mRNA [NM_032550]	5.51052	2.83943	3.05917	3.87486	0.0946932	-0.559945	-2.61953	-2.22354	A_24_P33770
AFAP1L2	Homo sapiens actin filament associated protein 1-like 2 (AFAP1L2), transcript variant 1, mRNA [NM_001001936]	30.235	1.77454	39.7538	29.5835	-0.386054	-4.17481	-1.85636	-2.22767	A_23_P406341
AFF1	Homo sapiens AF4/FMR2 family, member 1 (AFF1), transcript variant 2, mRNA [NM_005935]	39.9262	19.0318	262.263	189.251	0.114247	-0.652732	0.964676	0.548953	A_23_P169619
AFF1	Homo sapiens AF4/FMR2 family, member 1 (AFF1), transcript variant 2, mRNA [NM_005935]	22.9209	11.2563	62.0168	128.426	-0.0438318	-0.767811	-0.473012	0.632186	A_23_P29897
AFF1	Homo sapiens AF4/FMR2 family, member 1 (AFF1), transcript variant 2, mRNA [NM_005935]	104.285	106.951	703.542	1827.03	-0.888932	-0.550562	0	1.43178	A_24_P414332
AFF2	Homo sapiens AF4/FMR2 family, member 2 (AFF2), transcript variant 1, mRNA [NM_002025]	2.1978	1.91564	3.57831	7.89651	0.320975	0.424685	-0.840985	0.355942	A_23_P217468
AFF3	Homo sapiens AF4/FMR2 family, member 3 (AFF3), transcript variant 1, mRNA [NM_002285]	5.68456	1.74965	101.017	26.864	-0.469532	-1.86757	1.81669	-0.0391641	A_24_P366670
AFF3	Homo sapiens AF4/FMR2 family, member 3 (AFF3), transcript variant 1, mRNA [NM_002285]	4.34785	1.82405	41.1785	4.38966	-0.204544	-1.15576	1.1738	-2.00092	A_23_P373464
AFF4	Homo sapiens AF4/FMR2 family, member 4 (AFF4), mRNA [NM_014423]	207.488	183.044	2487.29	3833.55	-1.43157	-1.31046	0.286721	0.965818	A_24_P286079
AFF4	Homo sapiens AF4/FMR2 family, member 4 (AFF4), mRNA [NM_014423]	44.1583	27.4158	193.513	373.7	-0.170273	-0.556005	0.0962224	1.10066	A_24_P942636
AFF4	Homo sapiens AF4/FMR2 family, member 4 (AFF4), mRNA [NM_014423]	21.7699	10.4422	223.435	228.848	-1.67519	-2.43315	-0.180923	-0.0913944	A_24_P394408
AFF4	Homo sapiens AF4/FMR2 family, member 4 (AFF4), mRNA [NM_014423]	78.1542	84.8303	629.217	1082.33	-0.849151	-0.428948	0.294833	1.13233	A_23_P218977
AFF4	Homo sapiens AF4/FMR2 family, member 4 (AFF4), mRNA [NM_014423]	31.7855	33.6896	178.885	190.688	-0.686402	-0.300523	-0.0589881	0.0881834	A_24_P8318
AFG3L1P	Homo sapiens AFG3-like AAA ATPase 1, pseudogene (AFG3L1P), transcript variant 1, non-coding RNA [NR_003226]	236.312	194.07	2493.3	1324.99	-1.34803	-1.3302	0.186084	-0.671004	A_23_P404893
AFG3L1P	Homo sapiens AFG3-like AAA ATPase 1, pseudogene (AFG3L1P), transcript variant 1, non-coding RNA [NR_003226]	679.509	757.658	9722.38	5119.09	-1.43587	-0.976867	0.5377	-0.33273	A_23_P355289
AFG3L2	Homo sapiens AFG3-like AAA ATPase 2 (AFG3L2), mRNA [NM_006796]	571.961	799.618	5633.82	2995.23	-0.658527	0.126814	0.77642	-0.0800362	A_32_P117338
AFG3L2	Homo sapiens AFG3-like AAA ATPase 2 (AFG3L2), mRNA [NM_006796]	620.239	719.998	6436.81	3543.56	-0.870755	-0.353641	0.639518	-0.166637	A_23_P135454
AFM	Homo sapiens afamin (AFM), mRNA [NM_001133]	5.35148	6.01567	3.11552	3.8322	1.72249	2.19322	-0.923155	-0.569466	A_23_P69606
AFMID	Homo sapiens arylformamidase (AFMID), transcript variant 2, mRNA [NM_001010982]	70.806	85.913	350.424	239.267	0	0.580952	0.44198	-0.0535088	A_24_P33156
AFMID	Homo sapiens arylformamidase (AFMID), transcript variant 3, long non-coding RNA [NR_027083]	29.9807	11.5493	186.933	54.8916	0.466187	-0.608097	1.24142	-0.471446	A_24_P867342
AFP	Homo sapiens alpha-fetoprotein (AFP), mRNA [NM_001134]	2.05098	1.81837	5.48818	3.85692	-0.0411854	0.087091	-0.486349	-0.940237	A_23_P58205
AFTPH	Homo sapiens aftiphilin (AFTPH), transcript variant 2, mRNA [NM_017657]	197.127	133.439	1763.9	1790.51	-1.42164	-1.68263	-0.125243	-0.0486507	A_24_P122862
AFTPH	Homo sapiens aftiphilin (AFTPH), transcript variant 1, mRNA [NM_203437]	729.567	681.231	1939.8	2242.18	0.112458	0.315507	-0.341928	-0.0779362	A_23_P102542
AFTPH	Homo sapiens aftiphilin (AFTPH), transcript variant 1, mRNA [NM_203437]	523.573	380.895	2167.98	2259.83	-0.557363	-0.714414	-0.372652	-0.257798	A_23_P428382
AGA	Homo sapiens aspartylglucosaminidase (AGA), transcript variant 1, mRNA [NM_000027]	1544.89	873.77	1712.32	1890.68	1.40517	0.884937	-0.311558	-0.113614	A_23_P7099
AGAP1	Homo sapiens ArfGAP with GTPase domain, ankyrin repeat and PH domain 1 (AGAP1), transcript variant 1, mRNA [NM_001037131]	272.133	296.102	1808.2	1948.39	-0.560445	-0.136716	0.306548	0.469267	A_23_P108404
AGAP1	Homo sapiens ArfGAP with GTPase domain, ankyrin repeat and PH domain 1 (AGAP1), transcript variant 1, mRNA [NM_001037131]	399.123	260.269	1725.19	1549.59	-0.121197	-0.436081	0.125477	0.0256004	A_32_P55161
AGAP1	Homo sapiens ArfGAP with GTPase domain, ankyrin repeat and PH domain 1 (AGAP1), transcript variant 1, mRNA [NM_001037131]	346.531	638.262	2325.71	2308.55	-0.803336	0.379773	0.0780983	0.122406	A_23_P119794
AGAP11	Homo sapiens ankyrin repeat and GTPase domain Arf GTPase activating protein 11 (AGAP11), mRNA [NM_133447]	55.5144	78.0567	2122.07	1134.19	-2.64255	-1.84895	0.748733	-0.100082	A_32_P211363
AGAP2	Homo sapiens ArfGAP with GTPase domain, ankyrin repeat and PH domain 2 (AGAP2), transcript variant 1, mRNA [NM_001122772]	2.0058	5.22444	47.3536	23.001	-1.56486	0.118187	1.13119	0.144403	A_24_P244495
AGAP2-AS1	Homo sapiens AGAP2 antisense RNA 1 (AGAP2-AS1), long non-coding RNA [NR_027032]	253.133	164.09	837.834	751.194	-0.0899048	-0.413368	-0.228312	-0.330801	A_24_P417935
AGAP3	Homo sapiens ArfGAP with GTPase domain, ankyrin repeat and PH domain 3 (AGAP3), transcript variant 2, mRNA [NM_001042535]	7846.58	1909.42	19309.5	19636.9	1.73699	0	1.17098	1.25023	A_24_P333364
AGAP3	Homo sapiens ArfGAP with GTPase domain, ankyrin repeat and PH domain 3 (AGAP3), transcript variant 1, mRNA [NM_031946]	3754.25	4173.48	16907.5	12167	0.072155	0.526829	0.378047	-0.0416603	A_23_P111452
AGAP3	Homo sapiens ArfGAP with GTPase domain, ankyrin repeat and PH domain 3 (AGAP3), transcript variant 1, mRNA [NM_031946]	271.238	404.673	3264.26	1932.58	-1.25529	-0.376147	0.468656	-0.232578	A_24_P317622
AGAP6	Homo sapiens ArfGAP with GTPase domain, ankyrin repeat and PH domain 6 (AGAP6), mRNA [NM_001077665]	12.5641	11.5047	783.714	427.319	-2.99313	-2.81826	1.10464	0.284617	A_32_P8881
AGAP7P	Homo sapiens ArfGAP with GTPase domain, ankyrin repeat and PH domain 7, pseudogene (AGAP7P), mRNA [NM_001077685]	7.66752	6.3312	870.069	694.361	-2.10474	-2.07908	2.8563	2.58585	A_32_P230196
AGAP7P	Homo sapiens ArfGAP with GTPase domain, ankyrin repeat and PH domain 7, pseudogene (AGAP7P), mRNA [NM_001077685]	32.0594	72.2412	1197.5	679.314	-2.05376	-0.579734	1.30421	0.541316	A_23_P138394
AGAP7P	Homo sapiens ArfGAP with GTPase domain, ankyrin repeat and PH domain 7, pseudogene (AGAP7P), mRNA [NM_001077685]	23.4948	52.6934	726.796	426.911	-2.64996	-1.18273	0.435998	-0.276628	A_24_P729905
AGAP7P	Homo sapiens ArfGAP with GTPase domain, ankyrin repeat and PH domain 7, pseudogene (AGAP7P), mRNA [NM_001077685]	9.9642	5.67656	1044.85	727.037	-3.03281	-3.54261	1.81433	1.34613	A_32_P221958
AGAP7P	Homo sapiens ArfGAP with GTPase domain, ankyrin repeat and PH domain 7, pseudogene (AGAP7P), mRNA [NM_001077685]	48.1037	135.162	1209.54	694.017	-2.11121	-0.318792	0.67578	-0.0706482	A_32_P41526
AGAP9	Homo sapiens cDNA FLJ39589 fis, clone SKMUS2008607. [AK096908]	217.03	197.829	1483.64	1018.04	-1.1181	-0.949792	-0.210098	-0.698458	A_32_P37247
AGAP9	Homo sapiens cDNA FLJ39589 fis, clone SKMUS2008607. [AK096908]	222.835	140.327	881.969	838.787	-0.222354	-0.587596	-0.10278	-0.120214	A_32_P124493
AGBL1	ATP/GTP binding protein-like 1 [Source:HGNC Symbol;Acc:26504] [ENST00000567715]	2.15491	1.88968	4.73657	4.44353	0	0.112462	-0.728965	-0.76611	A_23_P309930
AGBL2	Homo sapiens ATP/GTP binding protein-like 2 (AGBL2), mRNA [NM_024783]	46.5934	29.1565	56.4932	44.616	0.374362	0	-1.21286	-1.49839	A_32_P167705
AGBL3	Homo sapiens ATP/GTP binding protein-like 3 (AGBL3), mRNA [NM_178563]	53.1018	33.2073	311.699	258.605	-0.182035	-0.557349	0.506106	0.291692	A_32_P82623
AGBL3	ATP/GTP binding protein-like 3 [Source:HGNC Symbol;Acc:27981] [ENST00000476700]	7.52111	6.19404	3.66146	7.92626	1.88808	1.90996	-1.01563	0.153587	A_24_P374572
AGBL4	ATP/GTP binding protein-like 4 [Source:HGNC Symbol;Acc:25892] [ENST00000416121]	1.90719	1.70059	3.31735	3.93649	0.447761	0.584294	-0.618835	-0.316963	A_23_P12303
AGBL4	ATP/GTP binding protein-like 4 [Source:HGNC Symbol;Acc:25892] [ENST00000416121]	2.15649	1.86985	5.20549	3.94439	0.452909	0.549095	-0.140918	-0.486156	A_24_P231361
AGBL5	Homo sapiens ATP/GTP binding protein-like 5 (AGBL5), transcript variant 3, mRNA [NM_001035507]	1182.2	1124.54	2981.17	2310.01	0.174011	0.403819	-0.356763	-0.669756	A_23_P154466
AGBL5	Homo sapiens ATP/GTP binding protein-like 5 (AGBL5), transcript variant 1, mRNA [NM_021831]	15.9865	16.7484	533.024	183.935	-3.40727	-3.03815	-0.213168	-1.69318	A_24_P45767
AGBL5	Homo sapiens ATP/GTP binding protein-like 5 (AGBL5), transcript variant 3, mRNA [NM_001035507]	120.012	148.756	966.439	751.471	-0.611717	0	0.532607	0.224638	A_24_P196372
AGER	Homo sapiens advanced glycosylation end product-specific receptor (AGER), transcript variant 1, mRNA [NM_001136]	178.225	129.083	260.184	223.179	0.163457	0	-1.15589	-1.32223	A_23_P93360
AGFG1	Homo sapiens ArfGAP with FG repeats 1 (AGFG1), transcript variant 2, mRNA [NM_004504]	2360.82	1684.5	11174.7	10836.3	-0.289671	-0.474696	0.0880222	0.09865	A_23_P169529
AGFG2	Homo sapiens ArfGAP with FG repeats 2 (AGFG2), mRNA [NM_006076]	3.15222	3.27822	23.9214	21.6695	-1.46376	-1.10527	-0.405081	-0.492725	A_24_P363583
AGFG2	Homo sapiens ArfGAP with FG repeats 2 (AGFG2), mRNA [NM_006076]	203.244	139.328	856.828	485.589	-0.828919	-1.0717	-0.6183	-1.38258	A_23_P311640
AGGF1	Homo sapiens angiogenic factor with G patch and FHA domains 1, mRNA (cDNA clone IMAGE:3659316), complete cds. [BC002828]	188.111	140.544	378.011	252.499	0.19186	0.0732436	-0.66647	-1.19363	A_24_P256513
AGGF1	Homo sapiens angiogenic factor with G patch and FHA domains 1 (AGGF1), mRNA [NM_018046]	824.272	608.645	763.01	2342.78	0.116179	-0.0193939	-1.86042	-0.186979	A_23_P250554
AGGF1	Homo sapiens angiogenic factor with G patch and FHA domains 1 (AGGF1), mRNA [NM_018046]	39.3069	30.8018	102.717	210.471	-0.651639	-0.701461	-1.131	-0.0410585	A_23_P41970
AGK	acylglycerol kinase [Source:HGNC Symbol;Acc:21869] [ENST00000492693]	1.81893	2.70978	15.1458	7.86137	-0.838646	0.0383892	0.353931	-0.53714	A_24_P917729
AGK	Homo sapiens acylglycerol kinase (AGK), mRNA [NM_018238]	180.838	180.135	1242.3	774.826	-0.288987	0.00734282	0.626079	0	A_23_P309224
AGL	Homo sapiens amylo-alpha-1, 6-glucosidase, 4-alpha-glucanotransferase (AGL), transcript variant 4, mRNA [NM_000028]	1072.37	739.002	1871.39	2402.15	1.15787	0.922668	0.0960035	0.511211	A_23_P200298
AGMAT	Homo sapiens agmatine ureohydrolase (agmatinase) (AGMAT), mRNA [NM_024758]	136.125	51.6148	1561.87	602.847	-0.049777	-1.14691	1.60532	0.286896	A_23_P103720
AGMAT	Homo sapiens agmatine ureohydrolase (agmatinase) (AGMAT), mRNA [NM_024758]	47.1449	8.66448	115.667	51.9487	1.18736	-0.954611	0.61699	-0.482841	A_24_P936171
AGMO	Homo sapiens alkylglycerol monooxygenase (AGMO), mRNA [NM_001004320]	2.19978	14.2974	3.61192	58.0512	0.0919437	3.09421	-1.05783	3.00365	A_23_P136116
AGO1	Homo sapiens argonaute RISC catalytic component 1 (AGO1), mRNA [NM_012199]	9.70639	7.25813	39.9764	19.4133	-0.292822	-0.410212	-0.115856	-1.10297	A_24_P96749
AGO1	Homo sapiens argonaute RISC catalytic component 1 (AGO1), mRNA [NM_012199]	3892.65	2711.98	6640.64	3233.33	0.868713	0.649253	-0.225892	-1.2092	A_23_P11764
AGO2	Homo sapiens argonaute RISC catalytic component 2 (AGO2), transcript variant 1, mRNA [NM_012154]	1265.95	849.837	4382.06	2045.38	0.170218	-0.102802	0.0964251	-0.947824	A_23_P112159
AGO3	Homo sapiens argonaute RISC catalytic component 3 (AGO3), transcript variant 1, mRNA [NM_024852]	717.375	373.882	1754.18	1620.82	0.445003	-0.193193	-0.130179	-0.189256	A_23_P97021
AGO3	argonaute RISC catalytic component 3 [Source:HGNC Symbol;Acc:18421] [ENST00000373191]	120.333	107.34	508.551	614.665	-0.319373	-0.182277	-0.105192	0.223207	A_32_P178842
AGO4	Homo sapiens argonaute RISC catalytic component 4 (AGO4), mRNA [NM_017629]	2.65477	2.19608	32.5726	15.4974	-0.532579	-0.504292	1.21924	0.202599	A_24_P941670
AGO4	Homo sapiens argonaute RISC catalytic component 4 (AGO4), mRNA [NM_017629]	203.621	225.672	1162.08	870.62	-0.065577	0.384712	0.581997	0.220394	A_24_P79631
AGO4	Homo sapiens argonaute RISC catalytic component 4 (AGO4), mRNA [NM_017629]	313.164	228.64	343.137	457.23	2.40261	2.25071	0.669298	1.13843	A_23_P23171
AGPAT1	Homo sapiens 1-acylglycerol-3-phosphate O-acyltransferase 1 (AGPAT1), transcript variant 1, mRNA [NM_006411]	4401.6	4184.06	5495.44	10575.5	0.36774	0.596563	-1.17723	-0.177824	A_23_P258093
AGPAT2	Homo sapiens 1-acylglycerol-3-phosphate O-acyltransferase 2 (AGPAT2), transcript variant 1, mRNA [NM_006412]	747.285	638.013	3811	1530.94	0.264392	0.338265	0.749653	-0.511103	A_32_P26103
AGPAT3	Homo sapiens 1-acylglycerol-3-phosphate O-acyltransferase 3 (AGPAT3), transcript variant 1, mRNA [NM_020132]	1510.8	860.981	4593.55	2475.87	0.312812	-0.196498	0.0519352	-0.784751	A_24_P344711
AGPAT3	Homo sapiens 1-acylglycerol-3-phosphate O-acyltransferase 3 (AGPAT3), transcript variant 1, mRNA [NM_020132]	113.247	40.9171	349.873	142.523	0.758374	-0.40838	0.52055	-0.720093	A_23_P218743
AGPAT3	Homo sapiens 1-acylglycerol-3-phosphate O-acyltransferase 3 (AGPAT3), transcript variant 1, mRNA [NM_020132]	4751	2254.18	7654.76	9070.52	0.688749	-0.0849342	-0.488301	-0.188483	A_23_P356466
AGPAT4	Homo sapiens 1-acylglycerol-3-phosphate O-acyltransferase 4 (AGPAT4), mRNA [NM_020133]	149.143	157.263	578.222	706.604	-0.652453	-0.274018	-0.5627	-0.218431	A_23_P58960
AGPAT4	Homo sapiens 1-acylglycerol-3-phosphate O-acyltransferase 4 (AGPAT4), mRNA [NM_020133]	671.257	971.439	763.107	1243.84	0.0233116	0.858518	-1.65684	-0.897006	A_32_P141768
AGPAT4	1-acylglycerol-3-phosphate O-acyltransferase 4 [Source:HGNC Symbol;Acc:20885] [ENST00000436279]	2.22075	1.89588	31.9779	12.2505	-0.653535	-0.579766	1.32924	0	A_23_P329452
AGPAT4-IT1	Homo sapiens AGPAT4 intronic transcript 1 (non-protein coding) (AGPAT4-IT1), long non-coding RNA [NR_024277]	35.8505	39.5741	602.759	464.275	-2.29016	-1.84565	-0.0838165	-0.405428	A_23_P70359
AGPAT5	Homo sapiens 1-acylglycerol-3-phosphate O-acyltransferase 5 (AGPAT5), mRNA [NM_018361]	138.31	144.794	2723.44	1097.66	-2.29059	-1.92255	0.143687	-1.11233	A_23_P216200
AGPAT5	Homo sapiens 1-acylglycerol-3-phosphate O-acyltransferase 5 (AGPAT5), mRNA [NM_018361]	659.564	399.15	4050.82	3246.66	-0.340876	-0.763512	0.412577	0.148311	A_24_P29876
AGPAT6	Homo sapiens 1-acylglycerol-3-phosphate O-acyltransferase 6 (AGPAT6), mRNA [NM_178819]	929.177	1182.59	4979.88	4846.93	-0.380218	0.269653	0.176691	0.192641	A_24_P103686
AGPAT6	Homo sapiens 1-acylglycerol-3-phosphate O-acyltransferase 6 (AGPAT6), mRNA [NM_178819]	1213.97	1592.71	3613.8	3748.19	0.41041	1.1041	0.119011	0.22668	A_23_P82839
AGPAT9	Homo sapiens 1-acylglycerol-3-phosphate O-acyltransferase 9 (AGPAT9), transcript variant 1, mRNA [NM_032717]	449.943	295.489	123.766	1424.95	1.36724	1.06255	-2.36006	1.22016	A_23_P69810
AGPS	Homo sapiens alkylglycerone phosphate synthase (AGPS), mRNA [NM_003659]	148.768	138.379	1087.13	725.346	-0.695707	-0.498202	0.308507	-0.220288	A_24_P902100
AGPS	Homo sapiens alkylglycerone phosphate synthase (AGPS), mRNA [NM_003659]	1006.42	1137.91	2459.57	1205.43	-0.0984716	0.380642	-0.674469	-1.64833	A_32_P27706
AGPS	Homo sapiens alkylglycerone phosphate synthase (AGPS), mRNA [NM_003659]	321.901	267.207	2129.47	1128.31	-0.860631	-0.827346	0	-0.86134	A_23_P368645
AGR2	Homo sapiens anterior gradient 2 (AGR2), mRNA [NM_006408]	1.93538	1.7395	47.7745	7.94067	-0.61694	-0.468935	2.14344	-0.390479	A_23_P31407
AGR3	Homo sapiens anterior gradient 3 (AGR3), mRNA [NM_176813]	3.43484	2.87256	3.35694	3.8645	1.06125	1.10529	-0.837027	-0.578897	A_23_P42811
AGRN	Homo sapiens agrin (AGRN), mRNA [NM_198576]	802.647	761.605	5435.8	1184.35	-0.610924	-0.3847	0.283553	-1.85985	A_24_P24819
AGRN	Homo sapiens agrin (AGRN), mRNA [NM_198576]	68.8178	68.6556	782.53	189.061	-1.10446	-0.805918	0.537654	-1.45665	A_24_P358462
AGRN	Homo sapiens agrin (AGRN), mRNA [NM_198576]	1063.39	1025.77	8239.64	2064.46	-1.08873	-0.838744	0	-1.94183	A_23_P343411
AGRP	Homo sapiens agouti related protein homolog (mouse) (AGRP), mRNA [NM_001138]	6.59747	4.23146	21.7939	34.0084	-0.280624	-0.619434	-0.421863	0.275097	A_23_P502320
AGT	Homo sapiens angiotensinogen (serpin peptidase inhibitor, clade A, member 8) (AGT), mRNA [NM_000029]	48.7447	84.246	35.5154	33.1038	2.29881	3.39011	-0.0231743	-0.0696292	A_23_P115261
AGTPBP1	Homo sapiens ATP/GTP binding protein 1 (AGTPBP1), transcript variant 2, mRNA [NM_015239]	596.373	498.465	2759.1	1001.83	1.11903	1.16226	1.46377	0.0571976	A_23_P169278
AGTPBP1	Homo sapiens mRNA for hypothetical protein, clone C91-V61. [AJ437018]	2.49152	1.73935	6.02211	4.07545	0.263509	0.0469785	-0.328424	-0.836744	A_24_P350832
AGTR1	Homo sapiens mRNA for angiotensin II type 1b receptor, complete cds. [D13814]	16.8925	20.3292	13.9644	132.754	1.01018	1.5793	-1.12963	2.17429	A_23_P211835
AGTR1	Homo sapiens angiotensin II receptor, type 1 (AGTR1), transcript variant 4, mRNA [NM_031850]	12.6719	6.43374	3.70769	193.359	1.62031	0.944355	-2.01791	3.7417	A_23_P166616
AGTR2	Homo sapiens angiotensin II receptor, type 2 (AGTR2), mRNA [NM_000686]	2.04388	1.76286	3.98101	4.83142	0.277999	0.366555	-0.625356	-0.291052	A_23_P62309
AGTRAP	Homo sapiens angiotensin II receptor-associated protein (AGTRAP), transcript variant 4, mRNA [NM_001040196]	528.216	531.47	570.318	1096.83	0.797369	1.10818	-0.95717	0.0413275	A_23_P158596
AGXT	alanine-glyoxylate aminotransferase [Source:HGNC Symbol;Acc:341] [ENST00000470255]	2.2396	2.00431	3.66655	4.36697	0.274763	0.416572	-0.879233	-0.572036	A_23_P83514
AGXT	Homo sapiens alanine-glyoxylate aminotransferase (AGXT), mRNA [NM_000030]	8.72694	4.49212	5.46636	4.83474	1.16177	0.505632	-1.37831	-1.50046	A_23_P83590
AGXT2	Homo sapiens alanine--glyoxylate aminotransferase 2 (AGXT2), mRNA [NM_031900]	2.01922	2.0026	3.03361	3.86535	0.451496	0.741517	-0.826448	-0.42189	A_24_P63468
AGXT2	Homo sapiens alanine--glyoxylate aminotransferase 2 (AGXT2), mRNA [NM_031900]	2.24303	3.56348	3.25103	6.1674	0.422541	1.39233	-0.907187	0.0715675	A_23_P156076
AHCTF1	Homo sapiens AT hook containing transcription factor 1 (AHCTF1), mRNA [NM_015446]	544.88	392.771	1813.75	1372.19	-0.202371	-0.372672	-0.33258	-0.680083	A_24_P28657
AHCTF1	Homo sapiens AT hook containing transcription factor 1 (AHCTF1), mRNA [NM_015446]	1168.01	834.855	6891.97	4051.67	-0.263949	-0.446453	0.431742	-0.279668	A_23_P63584
AHCTF1	Homo sapiens AT hook containing transcription factor 1 (AHCTF1), mRNA [NM_015446]	53.0551	32.8528	142.186	70.4127	0.322184	-0.0673456	-0.120777	-1.07966	A_32_P157228
AHCY	Homo sapiens adenosylhomocysteinase (AHCY), transcript variant 1, mRNA [NM_000687]	10228.5	6867.05	106705	67200.3	-1.28829	-1.56118	0.229489	-0.382611	A_23_P17575
AHCY	Homo sapiens adenosylhomocysteinase (AHCY), transcript variant 1, mRNA [NM_000687]	679.514	462.759	9717.51	4752.21	-1.38637	-1.63866	0.586465	-0.390531	A_24_P57367
AHCYL1	Homo sapiens adenosylhomocysteinase-like 1 (AHCYL1), transcript variant 1, mRNA [NM_006621]	701.199	848.444	3813.36	3879.9	-0.576941	0	0.00104618	0.0809956	A_24_P11307
AHCYL1	Homo sapiens adenosylhomocysteinase-like 1 (AHCYL1), transcript variant 1, mRNA [NM_006621]	8626.55	6896.51	18549.1	21345.5	0.0209713	0	-0.739711	-0.482136	A_23_P368126
AHCYL2	Homo sapiens adenosylhomocysteinase-like 2 (AHCYL2), transcript variant 1, mRNA [NM_015328]	109.824	69.2604	540.995	387.136	0.552702	0.189557	0.987947	0.560163	A_23_P252075
AHCYL2	Homo sapiens adenosylhomocysteinase-like 2 (AHCYL2), transcript variant 1, mRNA [NM_015328]	738.528	608.526	1799.95	2299	0.927649	0.950261	0.347701	0.755743	A_24_P72518
AHDC1	Homo sapiens AT hook, DNA binding motif, containing 1 (AHDC1), mRNA [NM_001029882]	2.16629	1.84173	7.19231	4.02547	-0.189801	-0.122023	-0.323751	-1.10606	A_24_P924999
AHDC1	Homo sapiens AT hook, DNA binding motif, containing 1 (AHDC1), mRNA [NM_001029882]	410.73	228.273	1040.4	884.896	-0.25366	-0.799146	-0.777967	-0.956528	A_23_P115331
AHI1	Homo sapiens Abelson helper integration site 1 (AHI1), transcript variant 2, mRNA [NM_017651]	51.0262	32.3898	233.538	362.269	-0.757352	-1.1111	-0.428185	0.260211	A_23_P70746
AHI1	Homo sapiens Abelson helper integration site 1 (AHI1), transcript variant 2, mRNA [NM_017651]	486.154	211.564	443.953	840.747	0.898375	0	-1.09781	-0.121552	A_24_P213710
AHI1	Homo sapiens Abelson helper integration site 1 (AHI1), transcript variant 2, mRNA [NM_017651]	23.8425	39.6346	59.1532	486.824	-0.991513	0.0436578	-1.54577	1.55009	A_24_P943484
AHI1	Homo sapiens Abelson helper integration site 1 (AHI1), transcript variant 2, mRNA [NM_017651]	307.924	204.432	231.191	1950.94	0.433671	0.144665	-1.84499	1.28701	A_24_P38143
AHNAK	Homo sapiens AHNAK nucleoprotein (AHNAK), transcript variant 1, mRNA [NM_001620]	1735.38	1449.88	34499.3	55879.6	-2.26025	-2.21763	0.187812	0.938559	A_24_P943393
AHNAK	Homo sapiens AHNAK nucleoprotein (AHNAK), transcript variant 1, mRNA [NM_001620]	37.0709	23.0086	118.855	205.417	-0.183663	-0.569829	-0.368001	0.476345	A_24_P912684
AHNAK	Homo sapiens AHNAK nucleoprotein (AHNAK), transcript variant 1, mRNA [NM_001620]	253.517	270.728	2452.74	3790.29	-0.526438	-0.12973	0.882622	1.56553	A_23_P426636
AHNAK	Homo sapiens AHNAK nucleoprotein (AHNAK), transcript variant 2, mRNA [NM_024060]	4645.32	3896.1	19192.1	3817.44	1.17749	1.22569	1.35898	-0.915864	A_23_P21363
AHNAK	Homo sapiens AHNAK nucleoprotein (AHNAK), transcript variant 1, mRNA [NM_001620]	138.525	106.599	619.079	1168.83	-0.672585	-0.748595	-0.377784	0.594075	A_23_P127789
AHNAK2	Homo sapiens AHNAK nucleoprotein 2 (AHNAK2), mRNA [NM_138420]	5.94019	1.87889	14.3439	110.163	-0.835752	-2.19444	-1.42908	1.56704	A_24_P178618
AHNAK2	Homo sapiens AHNAK nucleoprotein 2 (AHNAK2), mRNA [NM_138420]	85.3417	140.21	386.855	2514.34	-1.85409	-0.835875	-1.5388	1.21651	A_24_P273253
AHNAK2	Homo sapiens AHNAK nucleoprotein 2 (AHNAK2), mRNA [NM_138420]	421.415	542.099	1009.1	6689.14	-1.15811	-0.492845	-1.76353	1.02022	A_23_P311912
AHR	Homo sapiens aryl hydrocarbon receptor (AHR), mRNA [NM_001621]	2220.97	1808.83	1778.84	5895.5	1.33882	1.34463	-0.846611	0.937061	A_23_P215566
AHRR	Homo sapiens aryl-hydrocarbon receptor repressor (AHRR), transcript variant 1, mRNA [NM_020731]	956.171	1197.53	328.106	423.04	2.59741	3.22409	-0.81087	-0.389248	A_23_P358709
AHRR	Homo sapiens aryl-hydrocarbon receptor repressor (AHRR), transcript variant 1, mRNA [NM_020731]	117.841	131.737	300.089	156.984	1.333	1.79576	0.816367	-0.063417	A_23_P344400
AHSA1	Homo sapiens AHA1, activator of heat shock 90kDa protein ATPase homolog 1 (yeast) (AHSA1), mRNA [NM_012111]	3282.83	2642.17	23167.8	16741.9	-0.738079	-0.749346	0.215856	-0.197808	A_23_P117599
AHSA2	AHA1, activator of heat shock 90kDa protein ATPase homolog 2 (yeast) [Source:HGNC Symbol;Acc:20437] [ENST00000394457]	121.411	85.8417	1092.32	320.536	-1.29376	-1.49196	0.0104933	-1.70336	A_32_P81173
AHSA2	Homo sapiens AHA1, activator of heat shock 90kDa protein ATPase homolog 2 (yeast) (AHSA2), mRNA [NM_152392]	956.069	1716.67	7441.28	5815.64	-1.36049	-0.214114	-0.2653	-0.565922	A_23_P372467
AHSG	Homo sapiens alpha-2-HS-glycoprotein (AHSG), mRNA [NM_001622]	2.06846	1.87011	18.5293	23.6462	-0.976603	-0.820093	0.321402	0.728188	A_23_P155514
AHSG	Homo sapiens alpha-2-HS-glycoprotein (AHSG), mRNA [NM_001622]	19.7079	1.79187	47.5716	64.2851	1.14277	-2.01451	0.548926	1.0383	A_23_P155509
AHSP	Homo sapiens alpha hemoglobin stabilizing protein (AHSP), mRNA [NM_016633]	1.97179	1.70875	21.0796	22.972	-0.840535	-0.745152	0.71256	0.891577	A_23_P135486
AICDA	Homo sapiens activation-induced cytidine deaminase (AICDA), mRNA [NM_020661]	2.78109	3.73988	3.27136	14.8025	0	0.729286	-1.63094	0.601928	A_23_P36641
AIDA	Homo sapiens axin interactor, dorsalization associated (AIDA), mRNA [NM_022831]	662.364	484.969	1584.75	2056.76	0.598021	0.450237	-0.00859642	0.422513	A_32_P182662
AIDA	Homo sapiens axin interactor, dorsalization associated (AIDA), mRNA [NM_022831]	59.1338	49.0067	893.524	1313.96	-1.17275	-1.14181	0.879524	1.49085	A_23_P97457
AIF1	Homo sapiens allograft inflammatory factor 1 (AIF1), transcript variant 2, mRNA [NM_004847]	2.70682	1.7855	3.52858	4.1646	0.584608	0.286285	-0.898082	-0.604001	A_23_P214627
AIF1L	Homo sapiens allograft inflammatory factor 1-like (AIF1L), transcript variant 3, mRNA [NM_001185095]	40.4245	10.8836	24283	18.8338	-2.71111	-4.30224	4.65422	-5.6232	A_23_P94380
AIF1L	Homo sapiens allograft inflammatory factor 1-like (AIF1L), transcript variant 3, mRNA [NM_001185095]	12.5381	4.86607	6517.1	3.83377	-2.83815	-3.90169	4.31845	-6.35782	A_23_P392384
AIFM1	Homo sapiens apoptosis-inducing factor, mitochondrion-associated, 1 (AIFM1), transcript variant 1, mRNA [NM_004208]	4737.13	4378.07	15902.9	13605.5	-0.0116987	0.176531	-0.129674	-0.299781	A_23_P72537
AIFM2	Homo sapiens apoptosis-inducing factor, mitochondrion-associated, 2 (AIFM2), transcript variant 2, mRNA [NM_032797]	2869.88	1165.08	16450.4	3512.44	-0.409285	-1.40791	0.244593	-1.92799	A_23_P138567
AIFM2	Homo sapiens apoptosis-inducing factor, mitochondrion-associated, 2 (AIFM2), transcript variant 2, mRNA [NM_032797]	3112.58	2903.55	8443.53	2113.69	0.261107	0.462763	-0.164334	-2.10742	A_32_P75094
AIFM3	Homo sapiens apoptosis-inducing factor, mitochondrion-associated, 3 (AIFM3), transcript variant 2, mRNA [NM_001018060]	9.36307	1.94108	37.1011	46.647	0.422288	-1.54589	0.543519	0.928832	A_23_P258194
AIG1	Homo sapiens androgen-induced 1 (AIG1), transcript variant 1, mRNA [NM_016108]	1725.33	1380.43	1037.88	3484.46	0.197355	0.177546	-2.40105	-0.59877	A_23_P93431
AIM1	Homo sapiens absent in melanoma 1 (AIM1), mRNA [NM_001624]	75.5627	95.9989	235.035	487.575	-0.294003	0.353287	-0.522053	0.585689	A_23_P70785
AIM1L	Homo sapiens absent in melanoma 1-like (AIM1L), mRNA [NM_001039775]	2.10253	2.46694	4.87089	11.3234	-1.41651	-0.883967	-2.06963	-0.797594	A_24_P68358
AIM1L	Homo sapiens absent in melanoma 1-like (AIM1L), mRNA [NM_001039775]	29.9323	8.26753	231.38	46.2028	-1.6892	-3.24343	-0.603888	-2.87311	A_23_P360329
AIM1L	Homo sapiens absent in melanoma 1-like (AIM1L), mRNA [NM_001039775]	5.95897	1.81067	52.3961	12.9901	-1.50855	-2.92514	-0.237399	-2.19446	A_24_P308229
AIM2	Homo sapiens absent in melanoma 2 (AIM2), mRNA [NM_004833]	2.23717	1.73272	3.54391	35.3983	-1.3407	-1.40739	-2.54221	0.83305	A_32_P44394
AIMP1	Homo sapiens aminoacyl tRNA synthetase complex-interacting multifunctional protein 1 (AIMP1), transcript variant 1, mRNA [NM_004757]	86.8522	38.1541	594.79	213.135	-0.237275	-1.12205	0.673295	-0.752326	A_24_P354523
AIMP1	Homo sapiens aminoacyl tRNA synthetase complex-interacting multifunctional protein 1 (AIMP1), transcript variant 1, mRNA [NM_004757]	5259.83	3216.25	21691.4	27443.4	-0.113576	-0.521266	0.0652819	0.459611	A_23_P121686
AIMP2	Homo sapiens aminoacyl tRNA synthetase complex-interacting multifunctional protein 2 (AIMP2), mRNA [NM_006303]	1876.52	1473.15	9338.49	9871.91	-1.13714	-1.18435	-0.687188	-0.552057	A_23_P70991
AIP	Homo sapiens aryl hydrocarbon receptor interacting protein (AIP), mRNA [NM_003977]	1880.64	1697.02	13263.1	5100.31	-0.320942	-0.167215	0.632006	-0.691768	A_23_P75380
AIP	Homo sapiens aryl hydrocarbon receptor interacting protein (AIP), mRNA [NM_003977]	1537.65	1410.76	12743.1	4609.4	-0.475213	-0.297523	0.710528	-0.701551	A_24_P38865
AIPL1	Homo sapiens aryl hydrocarbon receptor interacting protein-like 1 (AIPL1), transcript variant 1, mRNA [NM_014336]	2.02332	1.78355	3.27265	7.66718	0.337689	0.457662	-0.833755	0.449474	A_23_P100935
AIPL1	Homo sapiens aryl hydrocarbon receptor interacting protein-like 1 (AIPL1), transcript variant 1, mRNA [NM_014336]	1.85256	3.08067	2.99252	3.85024	0.178143	1.21381	-0.995193	-0.576613	A_23_P100931
AIRE	autoimmune regulator [Source:HGNC Symbol;Acc:360] [ENST00000397994]	4.35253	3.82801	22.7695	10.5045	-0.19413	-0.0774431	0.327872	-0.733232	A_24_P254355
AIRE	Homo sapiens autoimmune regulator (AIRE), mRNA [NM_000383]	17.165	8.79541	23.8083	22.9637	1.3214	0.658694	-0.0717888	-0.0689054	A_23_P68740
AJAP1	adherens junctions associated protein 1 [Source:HGNC Symbol;Acc:30801] [ENST00000378191]	2.06461	3.23665	32.4506	4.24441	-0.488001	0.462578	1.62112	-1.25849	A_24_P604989
AJAP1	Homo sapiens adherens junctions associated protein 1 (AJAP1), transcript variant 1, mRNA [NM_018836]	2.30141	1.78661	2098.1	173.657	-4.68764	-4.75098	3.27953	-0.260246	A_23_P23155
AJUBA	Homo sapiens ajuba LIM protein (AJUBA), transcript variant 1, mRNA [NM_032876]	2210.87	1370.73	20493	3723.14	-0.542806	-0.930529	0.804462	-1.60109	A_23_P54055
AK1	Homo sapiens adenylate kinase 1 (AK1), mRNA [NM_000476]	258.635	345.65	659.137	966.483	0.714361	1.4347	0.198845	0.806002	A_24_P278192
AK1	Homo sapiens adenylate kinase 1 (AK1), mRNA [NM_000476]	3108.7	2895.79	8072.13	6895.11	0.73645	0.936045	0.247911	0.0755262	A_23_P217088
AK2	Homo sapiens adenylate kinase 2 (AK2), transcript variant 2, mRNA [NM_013411]	465.877	156.927	2147.77	1292.05	-0.020628	-1.28854	0.319012	-0.359172	A_32_P207360
AK2	Homo sapiens adenylate kinase 2 (AK2), transcript variant 1, mRNA [NM_001625]	5588.57	3301.12	33151	20015.5	-0.538606	-0.996182	0.164719	-0.508227	A_24_P179903
AK2	Homo sapiens adenylate kinase 2 (AK2), transcript variant 2, mRNA [NM_013411]	1149.79	683.881	3785.19	2764.18	0.0131683	-0.434443	-0.133018	-0.531541	A_24_P500891
AK2	Homo sapiens adenylate kinase 2 (AK2), transcript variant 1, mRNA [NM_001625]	5306.74	2879.89	21015.4	11659.1	0.348085	-0.231783	0.468457	-0.326543	A_23_P200404
AK3	Homo sapiens adenylate kinase 3 (AK3), transcript variant 1, mRNA [NM_016282]	176.041	91.0824	563.49	1057.07	0.149745	-0.498978	-0.0369549	0.925642	A_24_P247106
AK4	Homo sapiens adenylate kinase 4 (AK4), transcript variant 1, mRNA [NM_001005353]	663.754	134.075	1152.55	3219.22	1.69161	-0.314055	0.622532	2.15941	A_24_P345290
AK4	Homo sapiens adenylate kinase 4 (AK4), transcript variant 1, mRNA [NM_001005353]	5458.68	1189.76	12538	23990	0.954501	-0.941429	0.289006	1.28012	A_32_P108655
AK4	Homo sapiens adenylate kinase 4 (AK4), transcript variant 1, mRNA [NM_001005353]	357.93	45.6817	732.423	1873.01	1.37963	-1.28841	0.54745	1.95705	A_32_P95067
AK4	Homo sapiens adenylate kinase 4 (AK4), transcript variant 1, mRNA [NM_001005353]	111.036	35.2598	1058.11	1865.76	-0.0363789	-1.38937	1.35083	2.22409	A_23_P200524
AK4	Homo sapiens adenylate kinase 4 (AK4), transcript variant 1, mRNA [NM_001005353]	171.524	39.1779	1246.81	2175.31	0.184623	-1.64373	1.1812	2.03918	A_24_P789425
AK5	Homo sapiens adenylate kinase 5 (AK5), transcript variant 1, mRNA [NM_174858]	7649.86	5301.06	231.143	14638.8	3.24205	3.01485	-3.6717	2.36815	A_23_P200015
AK5	Homo sapiens adenylate kinase 5 (AK5), transcript variant 1, mRNA [NM_174858]	74.7737	40.7085	3.73074	228.334	3.24901	2.67376	-2.94116	3.04937	A_24_P342632
AK6	Homo sapiens adenylate kinase 6 (AK6), transcript variant 3, mRNA [NM_001015891]	2409.07	2022.26	4247.58	10519.9	-0.0494356	0	-1.09645	0.266945	A_23_P21734
AK7	Homo sapiens adenylate kinase 7 (AK7), mRNA [NM_152327]	8.86158	2.15427	5.84113	40.0515	0.824066	-0.914351	-1.64243	1.1901	A_23_P105963
AK8	Homo sapiens cDNA FLJ36014 fis, clone TESTI2016101. [AK093333]	2.0045	1.7665	13.501	5.6611	-0.698362	-0.578767	0.188208	-1.01071	A_24_P931097
AK8	Homo sapiens adenylate kinase 8 (AK8), mRNA [NM_152572]	28.1228	12.7969	50.0041	94.1682	0.385409	-0.448588	-0.649461	0.318722	A_23_P83200
AK9	Homo sapiens adenylate kinase 9 (AK9), transcript variant 2, mRNA [NM_145025]	10.94	17.6746	140.107	114.343	-1.57372	-0.579704	0.239948	0.00177717	A_32_P36341
AK9	Homo sapiens adenylate kinase 9 (AK9), transcript variant 2, mRNA [NM_145025]	17.3934	14.5001	96.8637	64.1354	-0.722014	-0.682539	-0.109774	-0.649618	A_23_P348749
AK9	Homo sapiens adenylate kinase 9 (AK9), transcript variant 1, mRNA [NM_001145128]	2.19808	1.83912	3.54531	43.6413	0	0.0447187	-1.17551	2.50119	A_23_P392476
AKAP1	Homo sapiens A kinase (PRKA) anchor protein 1 (AKAP1), transcript variant 1, mRNA [NM_003488]	1267.65	1347.2	11506	6364.24	-1.67367	-1.28392	-0.35669	-1.15603	A_32_P132438
AKAP10	Homo sapiens A kinase (PRKA) anchor protein 10 (AKAP10), mRNA [NM_007202]	231.233	194.884	2166.02	972.419	-0.262047	-0.206828	1.10041	0	A_23_P317105
AKAP11	Homo sapiens A kinase (PRKA) anchor protein 11 (AKAP11), mRNA [NM_016248]	2938.46	2488.26	4058.66	5509.54	1.30139	1.36341	-0.0978441	0.398073	A_23_P204929
AKAP11	Homo sapiens cDNA FLJ11304 fis, clone PLACE1009997, weakly similar to Rattus norvegicus A-kinase anchoring protein AKAP 220 mRNA. [AK002166]	19.9214	22.3338	186.823	93.6365	-0.474473	-0.00761843	0.889629	-0.0519071	A_23_P418477
AKAP12	Homo sapiens A kinase (PRKA) anchor protein 12 (AKAP12), transcript variant 2, mRNA [NM_144497]	16.1767	24.4436	1624.89	1625.04	-2.386	-1.48851	2.3991	2.45422	A_23_P111311
AKAP12	Homo sapiens A kinase (PRKA) anchor protein 12 (AKAP12), transcript variant 2, mRNA [NM_144497]	423.881	257.733	1770.33	2469.81	0	-0.415838	0.197104	0.732482	A_23_P214897
AKAP12	Homo sapiens A kinase (PRKA) anchor protein 12 (AKAP12), transcript variant 1, mRNA [NM_005100]	2436.16	2578.57	3901.45	7816.24	1.18578	1.56968	0	1.05746	A_32_P152437
AKAP13	Homo sapiens A kinase (PRKA) anchor protein 13 (AKAP13), transcript variant 1, mRNA [NM_006738]	73.0595	56.5401	511.782	290.756	-1.11903	-1.18688	-0.175817	-0.936548	A_24_P155761
AKAP13	Homo sapiens A kinase (PRKA) anchor protein 13 (AKAP13), transcript variant 1, mRNA [NM_006738]	15.014	13.3071	84.5416	41.716	-0.413171	-0.28534	0.215004	-0.749067	A_24_P164337
AKAP13	Homo sapiens A kinase (PRKA) anchor protein 13 (AKAP13), transcript variant 1, mRNA [NM_006738]	805.351	537.487	4061.91	2650.35	-0.468524	-0.749966	0.000768661	-0.560218	A_23_P137276
AKAP13	Homo sapiens A kinase (PRKA) anchor protein 13 (AKAP13), transcript variant 1, mRNA [NM_006738]	1589.08	1954.72	5375.54	4013.37	0.0756073	0.67633	-0.0313501	-0.397954	A_24_P142095
AKAP14	Homo sapiens A kinase (PRKA) anchor protein 14 (AKAP14), transcript variant 1, mRNA [NM_178813]	2.04248	1.81227	3.39552	3.85253	0.144855	0.274277	-0.987015	-0.749848	A_23_P313652
AKAP17A	Homo sapiens A kinase (PRKA) anchor protein 17A (AKAP17A), transcript variant 1, mRNA [NM_005088]	4706.75	2960.61	26607.8	15518.6	-0.182	-0.548889	0.45187	-0.270992	A_23_P342668
AKAP17A	A kinase (PRKA) anchor protein 17A [Source:HGNC Symbol;Acc:18783] [ENST00000381261]	1.8642	5.92539	63.0616	30.6834	-1.77022	0.200084	1.44474	0.460427	A_24_P16856
AKAP2	Homo sapiens A kinase (PRKA) anchor protein 2 (AKAP2), transcript variant 1, mRNA [NM_001004065]	620.574	419.282	892.995	2317.64	1.3346	1.07087	-0.00552654	1.4254	A_23_P359043
AKAP3	Homo sapiens A kinase (PRKA) anchor protein 3 (AKAP3), transcript variant 2, mRNA [NM_006422]	2.31162	2.03395	3.59715	32.6624	0.146804	0.264133	-1.08042	2.15727	A_23_P14035
AKAP4	Homo sapiens A kinase (PRKA) anchor protein 4 (AKAP4), transcript variant 1, mRNA [NM_003886]	3.38457	6.53214	5.19758	3.85041	1.24242	2.49295	-0.00389576	-0.381733	A_23_P11081
AKAP5	Homo sapiens A kinase (PRKA) anchor protein 5 (AKAP5), mRNA [NM_004857]	2.07315	1.80771	64.8276	6.00123	-1.27288	-1.16859	1.82866	-1.54963	A_23_P106103
AKAP6	Homo sapiens A kinase (PRKA) anchor protein 6 (AKAP6), mRNA [NM_004274]	21.1325	5.54458	27.5447	36.2537	1.7538	0.125435	0.270935	0.72228	A_23_P14343
AKAP6	Homo sapiens A kinase (PRKA) anchor protein 6 (AKAP6), mRNA [NM_004274]	10.8723	5.90463	3.93914	4.68475	1.96292	1.38413	-1.36696	-1.06188	A_23_P14351
AKAP7	Homo sapiens A kinase (PRKA) anchor protein 7 (AKAP7), transcript variant gamma, mRNA [NM_016377]	737.771	632.401	658.42	616.896	0.783299	0.86291	-1.24605	-1.28504	A_23_P259594
AKAP8	Homo sapiens A kinase (PRKA) anchor protein 8 (AKAP8), mRNA [NM_005858]	2699.05	1888.96	11820.8	5799.71	0.126496	-0.0864153	0.392123	-0.580159	A_23_P142380
AKAP8L	A kinase (PRKA) anchor protein 8-like [Source:HGNC Symbol;Acc:29857] [ENST00000598292]	89.7195	60.4951	702.437	309.067	-0.254171	-0.520827	0.849527	-0.279931	A_24_P934594
AKAP8L	Homo sapiens A kinase (PRKA) anchor protein 8-like (AKAP8L), transcript variant 1, mRNA [NM_014371]	1258.51	1123.21	6468.65	4741.54	-0.328823	-0.190969	0.167742	-0.225375	A_23_P153767
AKAP9	Homo sapiens cDNA FLJ20263 fis, clone COLF7804, highly similar to AJ131693 Homo sapiens mRNA for AKAP450 protein. [AK000270]	2.12113	1.81778	21.6995	4.65618	-0.64773	-0.568439	0.841849	-1.3236	A_24_P916797
AKAP9	Homo sapiens A kinase (PRKA) anchor protein 9 (AKAP9), transcript variant 2, mRNA [NM_005751]	2523.21	2267.16	5010.64	8903.83	0.165907	0.313476	-0.709538	0.174886	A_23_P309261
AKAP9	A kinase (PRKA) anchor protein 9 [Source:HGNC Symbol;Acc:379] [ENST00000493453]	1.94522	2.97463	3.353	3.84278	0.309656	1.22438	-0.770002	-0.518312	A_23_P123108
AKIP1	Homo sapiens A kinase (PRKA) interacting protein 1 (AKIP1), transcript variant 1, mRNA [NM_020642]	1258.67	835.187	5908.37	3831.7	-0.318745	-0.60853	0.046936	-0.522849	A_23_P53152
AKIP1	Homo sapiens A kinase (PRKA) interacting protein 1 (AKIP1), transcript variant 1, mRNA [NM_020642]	6707.02	5551.04	23037.3	22426.7	-0.162788	-0.133754	-0.247735	-0.231498	A_24_P357809
AKIRIN1	Homo sapiens akirin 1 (AKIRIN1), transcript variant 1, mRNA [NM_024595]	795.83	520.294	3563.36	2621.12	0.220181	-0.0910053	0.517709	0.129645	A_23_P256148
AKIRIN1	Homo sapiens akirin 1 (AKIRIN1), transcript variant 1, mRNA [NM_024595]	211.479	160.121	1152.47	889.926	0.03759	-0.06181	0.618561	0.300577	A_23_P256142
AKIRIN2	Homo sapiens akirin 2 (AKIRIN2), mRNA [NM_018064]	7923.22	3979.54	4901.41	8585.79	1.40108	0.709538	-1.15699	-0.293247	A_23_P428819
AKIRIN2	Homo sapiens akirin 2 (AKIRIN2), mRNA [NM_018064]	676.459	399.028	644.732	1025.88	1.1511	0.691532	-0.783381	-0.0582924	A_23_P428827
AKNA	AT-hook transcription factor [Source:HGNC Symbol;Acc:24108] [ENST00000312033]	5.15875	5.2796	8.68691	8.34713	0.696259	1.03161	-0.417099	-0.41967	A_24_P912439
AKNA	Homo sapiens AT-hook transcription factor (AKNA), mRNA [NM_030767]	12.0568	19.6828	57.3091	54.5807	-0.383737	0.625295	0	-0.0153837	A_23_P71948
AKNAD1	AKNA domain containing 1 [Source:HGNC Symbol;Acc:28398] [ENST00000472781]	4.75096	3.00808	3.14982	3.95921	0.754965	0.397534	-1.70316	-1.31823	A_23_P337292
AKNAD1	Homo sapiens AKNA domain containing 1 (AKNAD1), transcript variant 1, mRNA [NM_152763]	1.93252	1.72327	3.04176	5.96238	0.418844	0.555459	-0.791906	0.234066	A_24_P251233
AKR1A1	Homo sapiens aldo-keto reductase family 1, member A1 (aldehyde reductase) (AKR1A1), transcript variant 1, mRNA [NM_006066]	524.479	685.971	1252.8	2666.95	-0.53605	0.15316	-1.14503	0	A_24_P79755
AKR1A1	Homo sapiens aldo-keto reductase family 1, member A1 (aldehyde reductase) (AKR1A1), transcript variant 1, mRNA [NM_006066]	2028.23	2105.13	5514.9	11759.6	-0.656808	-0.301171	-1.07887	0.0685501	A_24_P79750
AKR1B1	Homo sapiens aldo-keto reductase family 1, member B1 (aldose reductase) (AKR1B1), mRNA [NM_001628]	6625.17	7368.25	23139.9	138623	-0.90584	-0.450527	-0.966663	1.67104	A_23_P258190
AKR1B10	Homo sapiens aldo-keto reductase family 1, member B10 (aldose reductase) (AKR1B10), mRNA [NM_020299]	560.358	50.2518	2358.42	892.224	1.24089	-1.93627	1.44911	0.101755	A_24_P129341
AKR1B10	Homo sapiens aldo-keto reductase family 1, member B10 (aldose reductase) (AKR1B10), mRNA [NM_020299]	897.805	88.7015	2511.62	939.438	1.88591	-1.15151	1.50488	0.141123	A_23_P93641
AKR1C1	Homo sapiens aldo-keto reductase family 1, member C1 (AKR1C1), mRNA [NM_001353]	4865.79	1733.71	49.3003	59267.8	2.69291	1.50604	-5.7972	4.48922	A_23_P257971
AKR1C1	Homo sapiens aldo-keto reductase family 1, member C1 (AKR1C1), mRNA [NM_001353]	6781.12	3438.65	52.2996	73903	2.64653	1.9688	-6.23722	4.28239	A_24_P220947
AKR1C1	Homo sapiens aldo-keto reductase family 1, member C1 (AKR1C1), mRNA [NM_001353]	406.532	275.827	14.9034	2750.01	2.47185	2.21419	-4.16298	3.41965	A_24_P152968
AKR1C3	Homo sapiens aldo-keto reductase family 1, member C3 (AKR1C3), transcript variant 1, mRNA [NM_003739]	1074.4	877.165	266.55	23890.2	-0.844269	-0.834932	-4.7205	1.82036	A_23_P138541
AKR1C4	Homo sapiens aldo-keto reductase family 1, member C4 (AKR1C4), mRNA [NM_001818]	2.13891	1.80725	3.39172	4.31489	0.277171	0.336035	-0.922869	-0.52057	A_23_P149926
AKR1C6P	Homo sapiens aldo-keto reductase family 1, member C6, pseudogene (AKR1C6P), non-coding RNA [NR_026743]	2.09377	1.81367	3.48038	4.36469	0.45781	0.552566	-0.674222	-0.292599	A_23_P370733
AKR1C6P	Homo sapiens aldo-keto reductase family 1, member C6, pseudogene (AKR1C6P), non-coding RNA [NR_026743]	2.11542	1.86825	3.4403	3.90074	0.48895	0.611644	-0.674632	-0.438428	A_32_P331916
AKR1D1	Homo sapiens aldo-keto reductase family 1, member D1 (AKR1D1), transcript variant 1, mRNA [NM_005989]	3.24005	1.87967	3.42767	6.45435	0.889965	0.406376	-0.894003	0.0740328	A_23_P255185
AKR1D1	Homo sapiens aldo-keto reductase family 1, member D1 (AKR1D1), transcript variant 1, mRNA [NM_005989]	2.01753	1.77988	3.05089	3.90266	0.486181	0.607323	-0.782356	-0.372135	A_23_P382000
AKR1E2	Homo sapiens aldo-keto reductase family 1, member E2 (AKR1E2), transcript variant 4, non-coding RNA [NR_073125]	16.4504	18.7602	4.87778	125.589	0.913161	1.40466	-2.70584	2.03549	A_23_P1322
AKR7A2	Homo sapiens aldo-keto reductase family 7, member A2 (aflatoxin aldehyde reductase) (AKR7A2), mRNA [NM_003689]	12891.1	7401.81	28984.2	21266	0.58811	0.0896301	-0.108175	-0.499907	A_23_P115356
AKR7A2P1	Homo sapiens aldo-keto reductase family 7, member A2 pseudogene 1 (AKR7A2P1), non-coding RNA [NR_002796]	85.9739	50.2995	1185.21	978.247	-1.59511	-2.06652	0.32481	0.102927	A_23_P316812
AKR7A3	Homo sapiens aldo-keto reductase family 7, member A3 (aflatoxin aldehyde reductase) (AKR7A3), mRNA [NM_012067]	754.245	428.068	5177.52	3885.18	-0.693767	-1.20901	0.220213	-0.139075	A_23_P103968
AKR7L	Homo sapiens aldo-keto reductase family 7-like (AKR7L), transcript variant 1, non-coding RNA [NR_040288]	5260.86	3179.24	13993.9	10348.4	0.377128	-0.0475397	-0.076623	-0.457016	A_23_P320304
AKT1	Homo sapiens v-akt murine thymoma viral oncogene homolog 1 (AKT1), transcript variant 1, mRNA [NM_005163]	243.921	287.861	966.93	604.109	0.546041	1.08694	0.667859	0.0442476	A_23_P2960
AKT1S1	Homo sapiens AKT1 substrate 1 (proline-rich) (AKT1S1), transcript variant 1, mRNA [NM_032375]	1061.11	841.766	1587.37	2118.97	1.0311	0.998956	-0.253022	0.218693	A_23_P153502
AKT2	Homo sapiens v-akt murine thymoma viral oncogene homolog 2 (AKT2), transcript variant 1, mRNA [NM_001626]	2092.52	849.168	5307.45	4524.18	0.547694	-0.451482	0.0252905	-0.150081	A_23_P208870
AKT2	Homo sapiens v-akt murine thymoma viral oncogene homolog 2 (AKT2), transcript variant 1, mRNA [NM_001626]	35513.4	16147	55234.2	50469.4	0.866902	0.0317526	-0.361077	-0.436239	A_24_P359267
AKT2	Homo sapiens v-akt murine thymoma viral oncogene homolog 2 (AKT2), transcript variant 1, mRNA [NM_001626]	183.944	99.5562	310.739	262.288	1.37386	0.790127	0.265122	0.0755611	A_23_P373475
AKT3	Homo sapiens v-akt murine thymoma viral oncogene homolog 3 (AKT3), transcript variant 2, mRNA [NM_181690]	60.3874	61.6686	524.872	194.255	-1.16787	-0.835636	0.0865974	-1.29242	A_23_P160354
AKT3	Homo sapiens v-akt murine thymoma viral oncogene homolog 3 (AKT3), transcript variant 1, mRNA [NM_005465]	4.30725	5.65292	83.7006	35.7645	-1.06806	-0.373884	1.34716	0.175444	A_24_P45481
AKT3	Homo sapiens v-akt murine thymoma viral oncogene homolog 3 (AKT3), transcript variant 1, mRNA [NM_005465]	1440.39	1328.59	6839.45	3749.03	0.247123	0.432503	0.629367	-0.183005	A_24_P110983
AKTIP	Homo sapiens AKT interacting protein (AKTIP), transcript variant 1, mRNA [NM_001012398]	147.685	162.565	1115.94	638.635	0.103061	0.543494	1.15555	0.40534	A_32_P224840
AKTIP	Homo sapiens AKT interacting protein (AKTIP), transcript variant 1, mRNA [NM_001012398]	350.158	505.558	2579.95	1405.82	0.0449009	0.876716	1.06099	0.240043	A_23_P163622
ALAD	Homo sapiens aminolevulinate dehydratase (ALAD), mRNA [NM_000031]	387.849	293.582	892.235	998.56	0.717078	0.617294	0.0538301	0.271246	A_23_P217114
ALAD	Homo sapiens aminolevulinate dehydratase (ALAD), mRNA [NM_000031]	388.431	245.357	1484.44	683.348	0.657524	0.296694	0.726531	-0.337702	A_23_P324278
ALAS1	Homo sapiens aminolevulinate, delta-, synthase 1 (ALAS1), transcript variant 1, mRNA [NM_000688]	292.757	222.76	4862.95	3890.72	-1.11048	-1.20274	1.0784	0.811601	A_24_P191588
ALAS1	Homo sapiens aminolevulinate, delta-, synthase 1 (ALAS1), transcript variant 1, mRNA [NM_000688]	126.455	134.234	1452.56	1162.5	-0.08111	0.306968	1.57561	1.30924	A_23_P57877
ALAS2	Homo sapiens aminolevulinate, delta-, synthase 2 (ALAS2), transcript variant 1, mRNA [NM_000032]	2.37307	2.94644	18.6655	29.2308	-0.876982	-0.262818	0.233389	0.935493	A_32_P385587
ALAS2	Homo sapiens aminolevulinate, delta-, synthase 2 (ALAS2), transcript variant 1, mRNA [NM_000032]	1.94127	1.69287	5.3183	3.97186	0.411209	0.51563	0	-0.366159	A_32_P22654
ALB	Homo sapiens albumin (ALB), mRNA [NM_000477]	8.22441	7.79248	5.80454	11.202	1.63319	1.85731	-0.734716	0.268775	A_23_P257834
ALCAM	Homo sapiens activated leukocyte cell adhesion molecule (ALCAM), transcript variant 1, mRNA [NM_001627]	428.85	242.527	612.529	762.259	-0.183561	-0.703944	-1.53444	-1.16394	A_23_P41227
ALCAM	Homo sapiens activated leukocyte cell adhesion molecule (ALCAM), transcript variant 1, mRNA [NM_001627]	37.4928	20.1669	60.4978	80.436	0.0963321	-0.496344	-1.07858	-0.612627	A_32_P74643
ALDH16A1	Homo sapiens aldehyde dehydrogenase 16 family, member A1 (ALDH16A1), transcript variant 1, mRNA [NM_153329]	867.108	661.624	3211.05	1374.63	0.297285	0.209031	0.320869	-0.848141	A_24_P5743
ALDH16A1	Homo sapiens aldehyde dehydrogenase 16 family, member A1 (ALDH16A1), transcript variant 1, mRNA [NM_153329]	3076.17	1938.49	9165.29	4098.75	0.387321	0.0230713	0.0971918	-1.00881	A_23_P50472
ALDH18A1	Homo sapiens aldehyde dehydrogenase 18 family, member A1 (ALDH18A1), transcript variant 1, mRNA [NM_002860]	4735.37	3669.71	8929.34	10953.6	0.450764	0.384897	-0.499338	-0.149573	A_23_P1361
ALDH1A1	Homo sapiens aldehyde dehydrogenase 1 family, member A1 (ALDH1A1), mRNA [NM_000689]	1509.88	1944.01	3.34504	17.064	8.31109	8.97763	-2.37229	0.0335574	A_23_P83098
ALDH1A2	Homo sapiens aldehyde dehydrogenase 1 family, member A2 (ALDH1A2), transcript variant 3, mRNA [NM_170697]	2.01043	1.78457	436.307	75.5421	-2.64821	-2.5182	3.2483	0.773305	A_23_P99956
ALDH1A2	Homo sapiens aldehyde dehydrogenase 1 family, member A2 (ALDH1A2), transcript variant 3, mRNA [NM_170697]	1.87838	1.69306	1205.4	282.128	-3.18395	-3.03186	4.27668	2.23658	A_24_P73577
ALDH1A3	Homo sapiens aldehyde dehydrogenase 1 family, member A3, mRNA (cDNA clone IMAGE:2960240). [BC009245]	1.97646	1.77213	22.826	47.4216	-1.66451	-1.52	0	1.10985	A_24_P917280
ALDH1A3	Homo sapiens aldehyde dehydrogenase 1 family, member A3 (ALDH1A3), mRNA [NM_000693]	2627.31	62.1716	14887.6	80658.8	-0.845609	-5.94485	-0.208333	2.28438	A_23_P205959
ALDH1B1	Homo sapiens aldehyde dehydrogenase 1 family, member B1 (ALDH1B1), mRNA [NM_000692]	205.009	125.781	4910.45	1346.3	-0.597658	-1.00048	2.11926	0.307392	A_23_P135294
ALDH1B1	Homo sapiens aldehyde dehydrogenase 1 family, member B1 (ALDH1B1), mRNA [NM_000692]	211.177	182.314	6597.73	1288.83	-0.955733	-0.86581	2.14454	-0.156381	A_24_P64233
ALDH1L1	aldehyde dehydrogenase 1 family, member L1 [Source:HGNC Symbol;Acc:3978] [ENST00000484724]	3.44674	1.73378	5.34901	4.11366	0.689365	0	-0.541774	-0.865632	A_24_P941870
ALDH1L1	Homo sapiens aldehyde dehydrogenase 1 family, member L1 (ALDH1L1), transcript variant 2, mRNA [NM_012190]	9.76398	1.93126	166.141	18.7599	0.625922	-1.41006	2.84954	-0.242151	A_23_P258887
ALDH1L1-AS2	Homo sapiens ALDH1L1 antisense RNA 2 (ALDH1L1-AS2), long non-coding RNA [NR_046383]	1.85844	1.67815	2.99274	3.85329	0.478783	0.633513	-0.699019	-0.279403	A_32_P222225
ALDH1L2	Homo sapiens aldehyde dehydrogenase 1 family, member L2 (ALDH1L2), transcript variant 1, mRNA [NM_001034173]	159.58	38.8192	3.59209	252.488	5.86878	4.13129	-1.46971	4.72053	A_23_P87941
ALDH1L2	Homo sapiens aldehyde dehydrogenase 1 family, member L2 (ALDH1L2), transcript variant 1, mRNA [NM_001034173]	1119.37	425.241	50.7935	3602.37	6.32708	5.23269	0	6.20315	A_32_P117016
ALDH2	Homo sapiens aldehyde dehydrogenase 2 family (mitochondrial) (ALDH2), transcript variant 1, mRNA [NM_000690]	11427.2	12930.3	6516.85	20753.8	0.787418	1.26765	-1.88798	-0.16186	A_23_P36745
ALDH2	Homo sapiens aldehyde dehydrogenase 2 family (mitochondrial) (ALDH2), transcript variant 1, mRNA [NM_000690]	714.557	689.993	1089.42	3477.5	0	0.251478	-1.25674	0.472743	A_23_P36753
ALDH3A1	Homo sapiens aldehyde dehydrogenase 3 family, member A1 (ALDH3A1), transcript variant 2, mRNA [NM_000691]	2.10566	1.79198	4.94382	4.41419	-0.344335	-0.275106	-0.978158	-1.08664	A_23_P207213
ALDH3A2	Homo sapiens aldehyde dehydrogenase 3 family, member A2 (ALDH3A2), transcript variant 1, mRNA [NM_001031806]	76.3318	140.855	1615.72	902.967	-2.02519	-0.839383	0.513384	-0.271055	A_23_P129896
ALDH3B1	Homo sapiens aldehyde dehydrogenase 3 family, member B1 (ALDH3B1), transcript variant 1, mRNA [NM_000694]	1102.41	1235.54	484.065	1105.12	1.07109	1.53752	-1.98147	-0.735549	A_24_P218688
ALDH3B2	Homo sapiens aldehyde dehydrogenase 3 family, member B2 (ALDH3B2), transcript variant 1, mRNA [NM_000695]	4.69106	2.81721	33.1138	44.6559	0	-0.433701	0.954268	1.44068	A_23_P24311
ALDH4A1	Homo sapiens aldehyde dehydrogenase 4 family, member A1 (ALDH4A1), transcript variant P5CDhL, mRNA [NM_003748]	3037.46	1178.73	8111.63	3597.06	1.36311	0.299417	0.915056	-0.203125	A_23_P170337
ALDH4A1	Homo sapiens aldehyde dehydrogenase 4 family, member A1 (ALDH4A1), transcript variant P5CDhS, mRNA [NM_170726]	136.789	104.59	983.066	193.725	0.618252	0.532994	1.59841	-0.689872	A_32_P192970
ALDH4A1	Homo sapiens aldehyde dehydrogenase 4 family, member A1 (ALDH4A1), transcript variant P5CDhL, mRNA [NM_003748]	1325.87	578.217	4883.5	1796.63	1.10246	0.207152	1.11826	-0.269368	A_24_P263036
ALDH5A1	Homo sapiens aldehyde dehydrogenase 5 family, member A1 (ALDH5A1), transcript variant 1, mRNA [NM_170740]	36.8515	3.3276	614.925	340.787	-2.41892	-5.58614	-0.223477	-1.02003	A_24_P115007
ALDH5A1	Homo sapiens aldehyde dehydrogenase 5 family, member A1 (ALDH5A1), transcript variant 1, mRNA [NM_170740]	4.24487	1.69357	74.2922	31.1106	-1.99804	-3.02175	0.266197	-0.934617	A_24_P923353
ALDH5A1	Homo sapiens aldehyde dehydrogenase 5 family, member A1 (ALDH5A1), transcript variant 1, mRNA [NM_170740]	9.01386	3.95236	214.935	96.6674	-2.42316	-3.31065	0.287274	-0.810535	A_24_P3761
ALDH6A1	Homo sapiens aldehyde dehydrogenase 6 family, member A1 (ALDH6A1), transcript variant 1, mRNA [NM_005589]	760.482	411.277	862.997	918.063	1.59113	1.00627	-0.091609	0.0526199	A_23_P128967
ALDH7A1	Homo sapiens aldehyde dehydrogenase 7 family, member A1 (ALDH7A1), transcript variant 1, mRNA [NM_001182]	275.928	488.033	596.975	455.948	-0.00727797	1.11735	-0.759079	-1.09289	A_24_P269006
ALDH7A1	Homo sapiens aldehyde dehydrogenase 7 family, member A1 (ALDH7A1), transcript variant 1, mRNA [NM_001182]	1515.63	1724.53	16593.9	6874.61	-1.29489	-0.806666	0.292589	-0.923722	A_23_P70231
ALDH8A1	Homo sapiens aldehyde dehydrogenase 8 family, member A1 (ALDH8A1), transcript variant 1, mRNA [NM_022568]	3.94113	1.89132	11.5871	54.8986	0.196895	-0.560372	-0.112447	2.1868	A_23_P214944
ALDH8A1	Homo sapiens aldehyde dehydrogenase 8 family, member A1 (ALDH8A1), transcript variant 1, mRNA [NM_022568]	2.00425	1.78915	15.3014	38.9008	-0.95496	-0.816803	0.112389	1.51352	A_24_P283324
ALDH9A1	Homo sapiens aldehyde dehydrogenase 9 family, member A1 (ALDH9A1), mRNA [NM_000696]	295.084	113.766	1559.96	1906.04	-0.552619	-1.62573	-0.015481	0.328576	A_24_P385280
ALDOA	Homo sapiens aldolase A, fructose-bisphosphate (ALDOA), transcript variant 2, mRNA [NM_184041]	642.266	287.734	30546.3	46522	-0.992271	-1.84876	2.71424	3.37614	A_24_P921584
ALDOA	Homo sapiens aldolase A, fructose-bisphosphate (ALDOA), transcript variant 1, mRNA [NM_000034]	19822.7	12480.7	79770.3	134564	-0.460585	-0.826095	-0.317065	0.492297	A_23_P88963
ALDOAP2	Human aldolase pseudogene mRNA, complete cds. [M21191]	962.201	850.806	8691.49	20580.8	-1.19259	-1.06815	0.117431	1.41604	A_24_P740942
ALDOB	Homo sapiens aldolase B, fructose-bisphosphate (ALDOB), mRNA [NM_000035]	2.14224	2.06975	11.3747	17.5907	-0.819563	-0.567278	-0.276107	0.407877	A_23_P32143
ALDOB	Homo sapiens aldolase B, fructose-bisphosphate (ALDOB), mRNA [NM_000035]	1.87756	1.69513	3.0742	4.05869	0.450493	0.604974	-0.703334	-0.247539	A_23_P415974
ALDOC	Homo sapiens aldolase C, fructose-bisphosphate (ALDOC), mRNA [NM_005165]	578.199	352.9	33.2054	1061.72	4.58668	4.17632	-1.40057	3.65326	A_23_P78108
ALG1	Homo sapiens ALG1, chitobiosyldiphosphodolichol beta-mannosyltransferase (ALG1), mRNA [NM_019109]	2158.94	1654.24	13053.6	6657.69	-0.00366306	-0.0858707	0.727215	-0.189153	A_23_P66306
ALG1	Homo sapiens ALG1, chitobiosyldiphosphodolichol beta-mannosyltransferase (ALG1), mRNA [NM_019109]	231.794	274.35	1866.11	1526.06	-0.431895	0.113225	0.71205	0.476816	A_32_P65395
ALG1	Homo sapiens ALG1, chitobiosyldiphosphodolichol beta-mannosyltransferase (ALG1), mRNA [NM_019109]	1374.66	1572.89	7182.42	5763.19	0	0.496296	0.520222	0.25761	A_32_P169131
ALG1	Homo sapiens ALG1, chitobiosyldiphosphodolichol beta-mannosyltransferase (ALG1), mRNA [NM_019109]	30.0798	51.0262	512.376	887.169	-1.06439	0	1.16077	2.00777	A_24_P565556
ALG1	Homo sapiens ALG1, chitobiosyldiphosphodolichol beta-mannosyltransferase (ALG1), mRNA [NM_019109]	1046.36	812.456	4992.24	2641.55	0.312193	0.249115	0.701317	-0.161994	A_24_P586523
ALG10	Homo sapiens ALG10, alpha-1,2-glucosyltransferase (ALG10), mRNA [NM_032834]	85.182	75.3429	218.993	262.582	-0.390135	-0.265266	-0.893047	-0.576176	A_23_P204333
ALG10B	Homo sapiens ALG10B, alpha-1,2-glucosyltransferase (ALG10B), mRNA [NM_001013620]	294.466	262.277	766.267	440.797	0.00641537	0.141352	-0.479016	-1.22176	A_32_P89679
ALG10B	Homo sapiens ALG10B, alpha-1,2-glucosyltransferase (ALG10B), mRNA [NM_001013620]	72.7517	76.0423	141.117	173.668	-0.076654	0.289114	-0.98599	-0.631558	A_32_P103309
ALG11	Homo sapiens ALG11, alpha-1,2-mannosyltransferase (ALG11), transcript variant A, mRNA [NM_001004127]	442.785	303.272	3165.4	1765.22	0.00961018	-0.23444	0.982141	0.194595	A_24_P102389
ALG12	Homo sapiens ALG12, alpha-1,6-mannosyltransferase (ALG12), mRNA [NM_024105]	161.4	127.949	377.774	429.079	0.346553	0.313433	-0.291739	-0.05303	A_23_P60718
ALG13	Homo sapiens ALG13, UDP-N-acetylglucosaminyltransferase subunit (ALG13), transcript variant 7, mRNA [NM_001257231]	984.066	739.205	1932.68	1910.74	0.852884	0.742049	-0.038516	0	A_23_P22672
ALG13	Homo sapiens ALG13, UDP-N-acetylglucosaminyltransferase subunit (ALG13), transcript variant 2, mRNA [NM_018466]	1065.04	721.709	2636.67	2145.48	-0.439763	-0.699237	-0.997135	-1.23956	A_23_P11279
ALG14	Homo sapiens ALG14, UDP-N-acetylglucosaminyltransferase subunit (ALG14), mRNA [NM_144988]	802.483	381.552	1457.68	2568.58	0.625546	-0.145097	-0.378501	0.49379	A_23_P257423
ALG1L	Homo sapiens ALG1, chitobiosyldiphosphodolichol beta-mannosyltransferase-like (ALG1L), transcript variant 2, mRNA [NM_001015050]	752.932	513.659	4465.5	2278.22	0.0732317	-0.176531	0.776283	-0.139639	A_32_P158355
ALG1L	Homo sapiens ALG1, chitobiosyldiphosphodolichol beta-mannosyltransferase-like (ALG1L), transcript variant 2, mRNA [NM_001015050]	653.724	521.738	3574.36	1784.5	0.157113	0.133704	0.742867	-0.204308	A_24_P583350
ALG2	Homo sapiens ALG2, alpha-1,3/1,6-mannosyltransferase (ALG2), transcript variant 1, mRNA [NM_033087]	1721.31	1204.5	3300.77	5584.99	0.886477	0.673347	-0.0394049	0.774338	A_23_P146728
ALG3	Homo sapiens ALG3, alpha-1,3- mannosyltransferase (ALG3), transcript variant 1, mRNA [NM_005787]	1181.78	934.066	2570.15	2201.42	0.219588	0.182165	-0.5247	-0.693131	A_23_P7005
ALG3	Homo sapiens ALG3, alpha-1,3- mannosyltransferase (ALG3), transcript variant 1, mRNA [NM_005787]	10839.7	6456.95	13547.3	13412.1	0.739724	0.294268	-0.803779	-0.763253	A_24_P414269
ALG5	Homo sapiens ALG5, dolichyl-phosphate beta-glucosyltransferase (ALG5), transcript variant 1, mRNA [NM_013338]	5867.03	5538.92	17303.2	25203.1	0.30484	0.523761	0	0.597553	A_23_P151436
ALG6	Homo sapiens ALG6, alpha-1,3-glucosyltransferase (ALG6), mRNA [NM_013339]	1238.08	714.979	2730.12	2228.35	0.222309	-0.267881	-0.502015	-0.740012	A_23_P35168
ALG8	Homo sapiens ALG8, alpha-1,3-glucosyltransferase (ALG8), transcript variant 2, mRNA [NM_001007027]	9615.92	5068.28	20242.8	11586.2	0.581505	-0.0404778	-0.209762	-0.959771	A_23_P13554
ALG9	Homo sapiens ALG9, alpha-1,2-mannosyltransferase (ALG9), transcript variant 3, mRNA [NM_001077691]	869.693	862.313	954.501	1230.41	1.61661	1.90627	-0.114323	0.306987	A_24_P795594
ALG9	Homo sapiens ALG9, alpha-1,2-mannosyltransferase (ALG9), transcript variant 3, mRNA [NM_001077691]	443.746	350.173	2704.99	2098.23	-0.110677	-0.150395	0.631963	0.320506	A_23_P64193
ALG9	Homo sapiens ALG9, alpha-1,2-mannosyltransferase (ALG9), transcript variant 3, mRNA [NM_001077691]	1373.52	1492.65	2956.04	2343.92	0.86061	1.28256	0.101224	-0.17853	A_32_P49188
ALK	Homo sapiens anaplastic lymphoma receptor tyrosine kinase (ALK), mRNA [NM_004304]	2.03429	1.7909	3.7626	4.16723	0.141832	0.259941	-0.83614	-0.633791	A_23_P324304
ALKBH1	Homo sapiens alkB, alkylation repair homolog 1 (E. coli) (ALKBH1), mRNA [NM_006020]	165.036	153.359	762.118	629.253	-0.207802	-0.0117178	0.134256	-0.0871267	A_23_P14543
ALKBH2	Homo sapiens alkB, alkylation repair homolog 2 (E. coli) (ALKBH2), transcript variant 2, mRNA [NM_001001655]	153.683	151.997	871.289	570.256	-0.243011	0.0430284	0.39501	-0.161541	A_24_P628384
ALKBH2	Homo sapiens alkB, alkylation repair homolog 2 (E. coli) (ALKBH2), transcript variant 2, mRNA [NM_001001655]	2223.69	2060.88	11029.8	6406.66	-0.104137	0.0881195	0.341061	-0.387704	A_32_P28939
ALKBH3	Homo sapiens alkB, alkylation repair homolog 3 (E. coli) (ALKBH3), mRNA [NM_139178]	311.481	217.191	1567.89	932.43	-0.492845	-0.711075	-0.026413	-0.721179	A_23_P35989
ALKBH4	Homo sapiens alkB, alkylation repair homolog 4 (E. coli) (ALKBH4), mRNA [NM_017621]	541.24	453.958	1951.03	1020.75	0.172291	0.220528	0.157011	-0.722612	A_23_P255523
ALKBH5	Homo sapiens alkB, alkylation repair homolog 5 (E. coli) (ALKBH5), mRNA [NM_017758]	816.311	1392.4	9941.51	8236.12	-0.480379	0.591949	1.26072	1.04421	A_23_P153050
ALKBH5	Homo sapiens alkB, alkylation repair homolog 5 (E. coli) (ALKBH5), mRNA [NM_017758]	137.315	264.248	1153.74	875.749	0.401205	1.64756	1.60679	1.26405	A_23_P416169
ALKBH6	Homo sapiens alkB, alkylation repair homolog 6 (E. coli) (ALKBH6), transcript variant 1, mRNA [NM_198867]	491.875	285.344	1684.68	1211.8	0.580567	0.0969229	0.491502	0.0711641	A_23_P39402
ALKBH7	Homo sapiens alkB, alkylation repair homolog 7 (E. coli) (ALKBH7), mRNA [NM_032306]	2263.22	1809.62	13298.8	6961.1	-0.126589	-0.147329	0.563078	-0.315837	A_24_P91472
ALKBH8	Homo sapiens alkB, alkylation repair homolog 8 (E. coli) (ALKBH8), mRNA [NM_138775]	36.1969	14.2738	165.803	124.7	0.00652552	-1.03402	0.336883	-0.0191326	A_23_P371876
ALLC	Homo sapiens allantoicase (ALLC), mRNA [NM_018436]	2.31554	1.97199	3.64145	4.28835	0.244756	0.315012	-0.967254	-0.676353	A_23_P108734
ALMS1	Homo sapiens Alstrom syndrome 1 (ALMS1), mRNA [NM_015120]	39.9876	45.1737	1084.99	353.009	-1.33189	-0.854016	1.56491	0	A_23_P312179
ALMS1	Homo sapiens Alstrom syndrome 1 (ALMS1), mRNA [NM_015120]	625.826	557.715	5544.67	2088.54	-0.180968	-0.0452538	1.10112	-0.252493	A_23_P312174
ALMS1P	Homo sapiens Alstrom syndrome 1 pseudogene (ALMS1P), non-coding RNA [NR_003683]	15.8143	13.4212	645.028	230.319	-1.69631	-1.63107	1.78857	0.357834	A_23_P435657
ALOX12	Homo sapiens arachidonate 12-lipoxygenase (ALOX12), mRNA [NM_000697]	6.42126	2.24449	18.6724	23.1767	0.419387	-0.795134	0.0941887	0.460946	A_23_P152909
ALOX12	Homo sapiens arachidonate 12-lipoxygenase (ALOX12), mRNA [NM_000697]	4.71819	4.51577	3.048	3.8371	1.41431	1.65299	-1.08124	-0.694097	A_23_P152906
ALOX12B	Homo sapiens arachidonate 12-lipoxygenase, 12R type (ALOX12B), mRNA [NM_001139]	2.97244	1.65111	28.945	33.8276	-1.38039	-1.92665	0.038033	0.317908	A_23_P83634
ALOX12P2	Homo sapiens arachidonate 12-lipoxygenase pseudogene 2 (ALOX12P2), transcript variant 1, non-coding RNA [NR_002710]	2.11908	1.85142	3.8279	3.93754	-0.447195	-0.340053	-1.45925	-1.36352	A_32_P440768
ALOX15	Human 12-lipoxygenase mRNA, partial cds. [M95923]	1.96872	1.69847	25.5415	20.2182	-0.674236	-0.585314	1.1581	0.875902	A_24_P931250
ALOX15	Homo sapiens arachidonate 15-lipoxygenase (ALOX15), mRNA [NM_001140]	2.28632	1.79642	3.61866	6.44709	-0.446066	-0.492026	-1.64882	-0.760634	A_23_P55373
ALOX15B	Homo sapiens arachidonate 15-lipoxygenase, type B (ALOX15B), transcript variant d, mRNA [NM_001141]	15.5874	9.41188	41.3644	289.568	0.589341	0.163465	0.132174	2.99461	A_23_P60627
ALOX5	Homo sapiens arachidonate 5-lipoxygenase (ALOX5), transcript variant 1, mRNA [NM_000698]	2.17522	1.84113	3.2702	4.07388	0.102383	0.16376	-1.17457	-0.802563	A_23_P104464
ALOX5AP	Homo sapiens arachidonate 5-lipoxygenase-activating protein (ALOX5AP), transcript variant 1, mRNA [NM_001629]	46.3154	88.9983	82.8184	152.569	0.661123	1.90536	-0.365594	0.570832	A_23_P2793
ALOX5AP	Homo sapiens arachidonate 5-lipoxygenase-activating protein (ALOX5AP), transcript variant 1, mRNA [NM_001629]	11.417	11.4555	19.3267	35.7789	0.569901	0.876707	-0.535865	0.407638	A_24_P347378
ALOXE3	Homo sapiens arachidonate lipoxygenase 3 (ALOXE3), transcript variant 2, mRNA [NM_021628]	6.38712	5.47191	34.1452	38.6005	-0.31844	-0.239614	0.23483	0.466756	A_24_P347880
ALPI	Homo sapiens alkaline phosphatase, intestinal (ALPI), mRNA [NM_001631]	5.90284	5.9241	31.9544	49.7801	-0.37647	-0.0693359	0.194886	0.889432	A_23_P337658
ALPK1	Homo sapiens alpha-kinase 1 (ALPK1), transcript variant 1, mRNA [NM_025144]	821.391	534.678	347.654	839.602	1.61162	1.29416	-1.49398	-0.166933	A_23_P133133
ALPK1	Homo sapiens cDNA: FLJ22670 fis, clone HSI08684. [AK026323]	3008.63	420.801	53223.7	34970.4	-1.09761	-3.63357	1.1821	0.631152	A_23_P144531
ALPK1	Homo sapiens alpha-kinase 1 (ALPK1), transcript variant 1, mRNA [NM_025144]	206.475	139.017	230.227	519.83	0.580989	0.312228	-1.1271	0.102874	A_23_P133142
ALPK2	Homo sapiens alpha-kinase 2 (ALPK2), mRNA [NM_052947]	620.774	395.067	1847.46	1529.83	0.508956	0.158932	0.21718	0	A_23_P15876
ALPK3	Homo sapiens alpha-kinase 3 (ALPK3), mRNA [NM_020778]	3.8002	4.96616	14.6538	10.1546	0.449574	1.13758	0.531525	0.0573707	A_23_P348728
ALPL	Homo sapiens alkaline phosphatase, liver/bone/kidney (ALPL), transcript variant 1, mRNA [NM_000478]	63.3049	6.69758	24.5001	36.2655	3.19388	0.255224	-0.0408239	0.579977	A_24_P353619
ALPL	Homo sapiens alkaline phosphatase, liver/bone/kidney (ALPL), transcript variant 1, mRNA [NM_000478]	20.2823	1.93342	12.1558	26.2003	1.70332	-1.38573	-0.900434	0.262496	A_23_P97046
ALPP	Homo sapiens alkaline phosphatase, placental (ALPP), mRNA [NM_001632]	8.76257	2.55256	158.941	124.167	-2.28828	-3.76575	0.0275326	-0.273687	A_23_P79587
ALPPL2	Homo sapiens alkaline phosphatase, placental-like 2 (ALPPL2), mRNA [NM_031313]	2.46612	3.82551	8.65176	4.15998	-0.774614	0.160741	-0.82904	-1.83047	A_23_P68183
ALPPL2	Homo sapiens alkaline phosphatase, placental-like 2 (ALPPL2), mRNA [NM_031313]	32.2459	23.5901	1398.81	1097.58	-2.22606	-2.37505	1.3477	1.05282	A_24_P131580
ALS2	Homo sapiens amyotrophic lateral sclerosis 2 (juvenile) (ALS2), transcript variant 2, mRNA [NM_001135745]	513.362	222.846	721.214	284.069	1.45931	0.557329	0.0845823	-1.20461	A_23_P377664
ALS2	Homo sapiens amyotrophic lateral sclerosis 2 (juvenile) (ALS2), transcript variant 1, mRNA [NM_020919]	102.78	72.8418	398.406	442.112	-0.28194	-0.476718	-0.19244	0.012722	A_23_P209430
ALS2	Homo sapiens amyotrophic lateral sclerosis 2 (juvenile) (ALS2), transcript variant 1, mRNA [NM_020919]	2.21258	1.87034	77.2522	15.6038	-1.72228	-1.66276	1.53832	-0.71437	A_24_P222410
ALS2CL	Homo sapiens ALS2 C-terminal like (ALS2CL), transcript variant 1, mRNA [NM_147129]	72.9434	11.3894	244.037	165.537	-0.721805	-3.09895	-0.844734	-1.34969	A_23_P416705
ALS2CL	Homo sapiens ALS2 C-terminal like (ALS2CL), transcript variant 1, mRNA [NM_147129]	85.81	19.1886	209.515	176.033	0.489095	-1.36985	-0.0882449	-0.284459	A_32_P420009
ALS2CR11	Homo sapiens amyotrophic lateral sclerosis 2 (juvenile) chromosome region, candidate 11 (ALS2CR11), transcript variant 2, mRNA [NM_152525]	19.706	6.97824	3.61656	41.4639	2.366	1.17025	-1.94512	1.62903	A_23_P328642
ALS2CR12	Homo sapiens amyotrophic lateral sclerosis 2 (juvenile) chromosome region, candidate 12 (ALS2CR12), transcript variant 1, mRNA [NM_139163]	4.86897	1.74739	5.48068	10.2842	0.579529	-0.596939	-1.11491	-0.151917	A_23_P349343
ALX1	Homo sapiens ALX homeobox 1 (ALX1), mRNA [NM_006982]	6.34258	9.22506	5.30523	110.488	0.672192	1.51463	-1.45064	2.98468	A_23_P83798
ALX3	Homo sapiens ALX homeobox 3 (ALX3), mRNA [NM_006492]	9.71583	8.86984	23.2417	18.3783	0.13845	0.308969	-0.468417	-0.752143	A_23_P85941
ALX4	Homo sapiens ALX homeobox 4 (ALX4), mRNA [NM_021926]	7.60304	8.77904	22.5513	19.1218	0.220976	0.73041	-0.0756383	-0.258641	A_23_P161792
ALYREF	Homo sapiens Aly/REF export factor (ALYREF), mRNA [NM_005782]	4003.13	4456.31	34568.7	8815.6	-0.357833	0.098835	0.887255	-1.02909	A_23_P152984
ALYREF	Homo sapiens Aly/REF export factor (ALYREF), mRNA [NM_005782]	974.418	848.723	14135.2	2944.18	-0.57117	-0.46847	1.42226	-0.786102	A_24_P387158
AMACR	Homo sapiens alpha-methylacyl-CoA racemase (AMACR), transcript variant 1, mRNA [NM_014324]	220.252	236.823	1046.46	1585.85	-0.406598	0	-0.0234861	0.631247	A_24_P106297
AMBN	Homo sapiens ameloblastin (enamel matrix protein) (AMBN), mRNA [NM_016519]	2.88978	1.92556	24.4858	21.1041	-0.674721	-0.958457	0.543015	0.383585	A_23_P44867
AMBP	Homo sapiens alpha-1-microglobulin/bikunin precursor (AMBP), mRNA [NM_001633]	8.85609	3.41383	4.05632	4.44334	1.28964	0.216312	-1.70203	-1.51557	A_23_P256504
AMBRA1	Homo sapiens autophagy/beclin-1 regulator 1 (AMBRA1), transcript variant 2, mRNA [NM_017749]	1854.63	1321.14	2187.52	3100.87	0.318863	0.13146	-1.30815	-0.749783	A_23_P353742
AMD1	Homo sapiens adenosylmethionine decarboxylase 1 (AMD1), transcript variant 1, mRNA [NM_001634]	7428.97	6033.37	25834.6	30564.4	0	0.00174999	-0.0671063	0.230434	A_24_P371962
AMD1	Homo sapiens adenosylmethionine decarboxylase 1 (AMD1), transcript variant 1, mRNA [NM_001634]	1168.21	923.43	4482.74	5482.2	-0.338586	-0.375858	-0.263676	0.0816889	A_23_P214121
AMDHD1	Homo sapiens amidohydrolase domain containing 1 (AMDHD1), mRNA [NM_152435]	102.457	31.2026	90.5939	135.405	2.09273	0.679398	0.0500212	0.684804	A_32_P122226
AMDHD2	Homo sapiens amidohydrolase domain containing 2 (AMDHD2), transcript variant 1, mRNA [NM_015944]	190.142	162.95	832.34	538.866	-0.152588	-0.0732937	0.11233	-0.459926	A_23_P49351
AMELX	Homo sapiens amelogenin, X-linked (AMELX), transcript variant 2, mRNA [NM_182681]	2.22684	6.77406	6.59373	4.43626	-0.386874	1.5201	-0.685953	-1.20271	A_23_P96478
AMELY	Homo sapiens amelogenin, Y-linked (AMELY), mRNA [NM_001143]	2.08349	4.02881	5.63001	4.16021	0.0474348	1.30073	-0.383604	-0.765095	A_24_P182254
AMER1	Homo sapiens APC membrane recruitment protein 1 (AMER1), mRNA [NM_152424]	62.3066	54.2139	344.512	236.999	-0.860436	-0.759213	-0.258519	-0.7432	A_23_P308150
AMER2	Homo sapiens APC membrane recruitment protein 2 (AMER2), transcript variant 1, mRNA [NM_152704]	2.03154	1.7694	4.14026	4.18825	0.305582	0.408216	-0.532446	-0.460829	A_23_P351305
AMER2	Homo sapiens APC membrane recruitment protein 2 (AMER2), transcript variant 1, mRNA [NM_152704]	2.12826	1.75216	29.2469	24.5722	-0.530639	-0.509231	1.38472	1.18846	A_32_P32116
AMER3	Homo sapiens APC membrane recruitment protein 3 (AMER3), transcript variant 1, mRNA [NM_152698]	1.91856	1.7428	3.3602	3.88541	0.358486	0.521817	-0.698169	-0.433659	A_24_P37355
AMER3	Homo sapiens APC membrane recruitment protein 3 (AMER3), transcript variant 1, mRNA [NM_152698]	3.15381	6.35272	46.2598	33.9814	-1.138	0.174227	0.871416	0.481396	A_24_P34568
AMFR	Homo sapiens autocrine motility factor receptor, E3 ubiquitin protein ligase (AMFR), mRNA [NM_001144]	3657.47	2847.44	7606.11	6770.67	1.14687	1.08764	0.338007	0.225139	A_24_P135444
AMFR	Homo sapiens autocrine motility factor receptor, E3 ubiquitin protein ligase (AMFR), mRNA [NM_001144]	1859.96	616.752	2909.84	1017.85	1.10348	-0.187086	-0.116031	-1.57646	A_23_P141005
AMH	Homo sapiens anti-Mullerian hormone (AMH), mRNA [NM_000479]	6.73888	13.8051	304.78	103.744	-3.58223	-2.24567	0.0517101	-1.44804	A_23_P78944
AMHR2	Homo sapiens anti-Mullerian hormone receptor, type II (AMHR2), transcript variant 1, mRNA [NM_020547]	2.17702	1.85642	4.27934	4.76294	-0.3304	-0.258283	-1.22055	-1.01109	A_24_P115990
AMICA1	Homo sapiens adhesion molecule, interacts with CXADR antigen 1 (AMICA1), transcript variant 2, mRNA [NM_153206]	2.89777	3.12216	3.51278	23.8853	0.501849	0.911401	-1.08566	1.73478	A_24_P192914
AMICA1	Homo sapiens adhesion molecule, interacts with CXADR antigen 1 (AMICA1), transcript variant 2, mRNA [NM_153206]	2.05571	1.80536	3.0734	3.91965	0.435092	0.549691	-0.849888	-0.444006	A_23_P1759
AMIGO1	adhesion molecule with Ig-like domain 1 [Source:HGNC Symbol;Acc:20824] [ENST00000369864]	64.7791	85.6627	194.861	109.701	1.26405	1.96914	0.987721	0.21384	A_24_P302506
AMIGO1	Homo sapiens adhesion molecule with Ig-like domain 1 (AMIGO1), mRNA [NM_020703]	5.87117	7.52307	38.5889	29.2204	-0.0731544	0.586465	0.778132	0.431916	A_23_P97598
AMIGO2	Homo sapiens adhesion molecule with Ig-like domain 2 (AMIGO2), transcript variant 2, mRNA [NM_181847]	139.614	296.863	824.604	1043.22	-2.34689	-0.95659	-1.64981	-1.25555	A_23_P14083
AMIGO3	Homo sapiens adhesion molecule with Ig-like domain 3 (AMIGO3), mRNA [NM_198722]	42.8406	77.4974	1499.61	261.154	-1.49142	-0.334303	1.77287	-0.693757	A_23_P306655
AMMECR1	Homo sapiens Alport syndrome, mental retardation, midface hypoplasia and elliptocytosis chromosomal region gene 1 (AMMECR1), transcript variant 1, mRNA [NM_015365]	2.81976	1.79016	30.8128	24.3978	-0.98342	-1.33696	0.601288	0.319498	A_23_P137116
AMMECR1	Homo sapiens Alport syndrome, mental retardation, midface hypoplasia and elliptocytosis chromosomal region gene 1 (AMMECR1), transcript variant 1, mRNA [NM_015365]	325.093	383.382	1513.08	1214.33	-0.353391	0.186488	0	-0.262336	A_32_P201773
AMMECR1	Alport syndrome, mental retardation, midface hypoplasia and elliptocytosis chromosomal region gene 1 [Source:HGNC Symbol;Acc:467] [ENST00000496695]	108.189	50.1474	98.8512	229.571	0.184911	-0.622442	-1.81048	-0.539881	A_24_P823011
AMMECR1L	Homo sapiens AMMECR1-like (AMMECR1L), transcript variant 1, mRNA [NM_031445]	3653.56	2837.82	9778.31	11490.8	0.432063	0.369493	-0.0128317	0.27498	A_23_P40039
AMMECR1L	Homo sapiens AMMECR1-like (AMMECR1L), transcript variant 1, mRNA [NM_031445]	2.05131	1.8209	64.8079	50.5523	-2.15458	-2.02452	0.961801	0.658401	A_23_P209760
AMN	Homo sapiens amnion associated transmembrane protein (AMN), mRNA [NM_030943]	131.362	79.8821	423.808	496.374	0.175316	-0.240344	0	0.283006	A_23_P48455
AMN	amnion associated transmembrane protein [Source:HGNC Symbol;Acc:14604] [ENST00000558590]	5.16053	2.55337	35.0109	28.5299	-0.947423	-1.66059	-0.0503898	-0.290726	A_24_P313210
AMN1	Homo sapiens antagonist of mitotic exit network 1 homolog (S. cerevisiae) (AMN1), transcript variant 3, mRNA [NM_001278412]	19.2514	13.5693	58.9662	126.826	-0.909626	-1.11229	-1.15987	0	A_24_P100830
AMOT	angiomotin [Source:HGNC Symbol;Acc:17810] [ENST00000304758]	3.05627	3.74129	3.61697	4.28859	0.721571	1.31528	-0.900594	-0.599884	A_23_P171232
AMOT	Homo sapiens angiomotin (AMOT), transcript variant 2, mRNA [NM_133265]	275.456	196.269	1248.35	142.758	1.53295	1.34591	1.8479	-1.22548	A_24_P344961
AMOTL1	Homo sapiens angiomotin like 1 (AMOTL1), mRNA [NM_130847]	1660.62	1468.84	1163.19	2415.67	1.59781	1.72272	-0.780993	0.328329	A_23_P138796
AMOTL1	Homo sapiens angiomotin like 1 (AMOTL1), mRNA [NM_130847]	257.051	237.89	226.793	453.855	1.25134	1.44153	-0.794517	0.261329	A_24_P329815
AMOTL1	Homo sapiens angiomotin like 1 (AMOTL1), mRNA [NM_130847]	25.4346	16.1223	45.2921	99.6545	0.848947	0.493154	-0.183765	1.0089	A_24_P401768
AMOTL1	Homo sapiens mRNA for FLJ00155 protein. [AK074084]	2.26949	3.01966	71.0234	19.3212	-2.54894	-1.83498	0.55374	-1.26938	A_24_P252823
AMOTL2	Homo sapiens angiomotin like 2 (AMOTL2), transcript variant 2, mRNA [NM_016201]	25597.3	21721.7	80712.8	44306.7	0.0166531	0.0817452	-0.19172	-1.002	A_23_P166686
AMPD1	Homo sapiens adenosine monophosphate deaminase 1 (AMPD1), transcript variant 1, mRNA [NM_000036]	2.14776	1.90177	3.46892	3.95133	0.42925	0.555713	-0.744271	-0.501426	A_23_P51787
AMPD2	Homo sapiens adenosine monophosphate deaminase 2 (AMPD2), transcript variant 1, mRNA [NM_004037]	1859.64	2232.1	2758.2	5539.36	0.391066	0.956387	-0.905407	0.155574	A_23_P201596
AMPD3	Homo sapiens adenosine monophosphate deaminase 3 (AMPD3), transcript variant 3, mRNA [NM_001025390]	5620.12	2741.96	17.2344	9361.69	3.58366	2.85022	-6.63068	2.50965	A_23_P116286
AMPD3	Homo sapiens adenosine monophosphate deaminase 3 (AMPD3), transcript variant 3, mRNA [NM_001025390]	1203.2	495.57	3.89011	3626.25	3.31444	2.33667	-6.82359	3.09585	A_24_P304154
AMPH	amphiphysin [Source:HGNC Symbol;Acc:471] [ENST00000450124]	2.74093	1.70554	3.87218	4.77791	0.67347	0.290982	-0.693228	-0.335005	A_24_P239234
AMPH	Homo sapiens amphiphysin (AMPH), transcript variant 1, mRNA [NM_001635]	44.7526	28.3479	4.14457	385.536	0.135934	-0.220852	-5.16192	1.43257	A_24_P218048
AMPH	Homo sapiens amphiphysin (AMPH), transcript variant 1, mRNA [NM_001635]	422.116	194.152	13.6111	832.979	1.49246	0.673957	-5.3275	0.662916	A_23_P31273
AMT	Homo sapiens aminomethyltransferase (AMT), transcript variant 1, mRNA [NM_000481]	218.058	350.935	433.41	324.4	1.09986	2.0883	0.225706	-0.137264	A_23_P257164
AMT	Homo sapiens aminomethyltransferase (AMT), transcript variant 1, mRNA [NM_000481]	58.2464	149.888	243.024	156.261	0.443598	2.10919	0.639277	0.0571289	A_24_P174503
AMY1C	Homo sapiens amylase, alpha 1C (salivary) (AMY1C), mRNA [NM_001008219]	51.8897	121.519	24.6976	1104.97	0.553891	2.0835	-2.38236	3.15612	A_23_P23611
AMZ1	Homo sapiens archaelysin family metallopeptidase 1 (AMZ1), transcript variant 1, mRNA [NM_133463]	5.42957	23.8197	10.2465	13.6571	-0.542696	1.8925	-1.49165	-1.02214	A_24_P383649
AMZ2	Homo sapiens archaelysin family metallopeptidase 2 (AMZ2), transcript variant 1, mRNA [NM_016627]	5544.72	2101.69	12938.5	16566.2	0.169435	-0.928184	-0.473261	-0.0616951	A_23_P15564
AMZ2P1	Homo sapiens archaelysin family metallopeptidase 2 pseudogene 1 (AMZ2P1), non-coding RNA [NR_026903]	2.08652	1.80044	3.53894	4.38353	0.41551	0.504706	-0.687446	-0.323679	A_23_P329254
AMZ2P1	Homo sapiens archaelysin family metallopeptidase 2 pseudogene 1 (AMZ2P1), non-coding RNA [NR_026903]	1121.74	474.55	8516.62	9377.19	-0.840903	-1.78007	0.218456	0.412322	A_24_P410587
ANAPC1	Homo sapiens anaphase promoting complex subunit 1 (ANAPC1), mRNA [NM_022662]	3379.72	1628.78	19583	11906.1	-0.59529	-1.34646	0.0741634	-0.588749	A_23_P17204
ANAPC1	Homo sapiens anaphase promoting complex subunit 1 (ANAPC1), mRNA [NM_022662]	287.783	154.922	2004.97	1519.06	-0.702288	-1.29378	0.233065	-0.11235	A_24_P186346
ANAPC1	Homo sapiens anaphase promoting complex subunit 1 (ANAPC1), mRNA [NM_022662]	38.4246	21.015	136.08	90.8338	0.56866	0	0.527833	-0.000325203	A_32_P12104
ANAPC1	Homo sapiens anaphase promoting complex subunit 1 (ANAPC1), mRNA [NM_022662]	23.8209	30.9047	355.942	252.421	-0.95433	-0.276786	1.08184	0.641018	A_32_P24656
ANAPC10	Homo sapiens anaphase promoting complex subunit 10 (ANAPC10), transcript variant 2, mRNA [NM_014885]	865.441	532.305	2307.09	2322.68	0.315851	-0.0833845	-0.134758	-0.0700541	A_23_P250994
ANAPC11	Homo sapiens anaphase promoting complex subunit 11 (ANAPC11), transcript variant 1, mRNA [NM_001002244]	43114	34667.7	152717	124251	0.0126209	0	-0.0279293	-0.27054	A_23_P27147
ANAPC13	Homo sapiens anaphase promoting complex subunit 13 (ANAPC13), transcript variant 1, mRNA [NM_015391]	2792.67	2354.93	4456.14	8465.77	0.583942	0.639927	-0.607086	0.373751	A_32_P16854
ANAPC15	Homo sapiens anaphase promoting complex subunit 15 (ANAPC15), transcript variant 3, mRNA [NM_014042]	604.167	313.001	2966.71	1595.06	-0.288489	-0.935322	0.142176	-0.698088	A_24_P244410
ANAPC16	Homo sapiens anaphase promoting complex subunit 16 (ANAPC16), transcript variant 2, mRNA [NM_173473]	8361.76	5809.16	16048.4	20002	0.442292	0.218761	-0.48233	-0.109628	A_32_P32207
ANAPC2	Homo sapiens anaphase promoting complex subunit 2 (ANAPC2), mRNA [NM_013366]	92.7823	89.5479	391.129	253.611	-0.0356035	0.215153	0.174943	-0.395096	A_23_P253068
ANAPC4	Homo sapiens anaphase promoting complex subunit 4 (ANAPC4), transcript variant 2, mRNA [NM_013367]	1731.61	1292.63	10792.9	8720.39	-0.138228	-0.258086	0.636496	0.383863	A_23_P317800
ANAPC5	Homo sapiens anaphase promoting complex subunit 5 (ANAPC5), transcript variant 1, mRNA [NM_016237]	1267.55	1785.49	7025.92	5415.63	-0.559693	0.236528	0.0457706	-0.274796	A_23_P377830
ANAPC5	Homo sapiens anaphase promoting complex subunit 5 (ANAPC5), transcript variant 1, mRNA [NM_016237]	21514.5	19270.6	46048.8	32831.7	0.630424	0.77346	-0.136898	-0.569982	A_23_P204448
ANAPC7	Homo sapiens anaphase promoting complex subunit 7 (ANAPC7), transcript variant 1, mRNA [NM_016238]	42.9923	36.7401	1269.16	900.241	-2.45436	-2.37913	0.564117	0.12362	A_23_P44643
ANAPC7	Homo sapiens anaphase promoting complex subunit 7 (ANAPC7), transcript variant 1, mRNA [NM_016238]	83.1742	90.1026	741.556	500.752	-0.653626	-0.236246	0.637544	0.126077	A_23_P44636
ANG	Homo sapiens angiogenin, ribonuclease, RNase A family, 5 (ANG), transcript variant 1, mRNA [NM_001145]	1028.85	1313.95	1559.99	2930.99	1.46096	2.11578	0.196281	1.16113	A_23_P428738
ANGEL1	Homo sapiens angel homolog 1 (Drosophila) (ANGEL1), mRNA [NM_015305]	159.878	129.42	385.054	376.951	0.572785	0.569814	-0.0243034	0	A_23_P363406
ANGEL2	Homo sapiens angel homolog 2 (Drosophila) (ANGEL2), mRNA [NM_144567]	1559.78	1639.47	4351.63	3804.51	-0.013278	0.360549	-0.398246	-0.537099	A_24_P28622
ANGEL2	Homo sapiens angel homolog 2 (Drosophila) (ANGEL2), mRNA [NM_144567]	666.413	582.898	1735.43	1784.92	0.0993032	0.208076	-0.385067	-0.289513	A_24_P28619
ANGEL2	Homo sapiens angel homolog 2 (Drosophila) (ANGEL2), mRNA [NM_144567]	11.8613	7.28201	146.904	85.3756	-1.20818	-1.61009	0.557174	-0.170809	A_23_P343237
ANGPT1	Homo sapiens angiopoietin 1 (ANGPT1), transcript variant 1, mRNA [NM_001146]	78.2467	19.3872	3.06012	92.9846	1.92191	0.210936	-4.61963	0.360689	A_24_P60887
ANGPT1	Homo sapiens angiopoietin 1 (ANGPT1), transcript variant 1, mRNA [NM_001146]	4595.77	1852.19	3.21728	826.159	5.35161	4.34249	-6.99381	1.06561	A_23_P216023
ANGPT1	angiopoietin 1 [Source:HGNC Symbol;Acc:484] [ENST00000521950]	2.18096	1.8151	3.57176	4.44455	0.334705	0.371741	-0.818799	-0.448404	A_23_P431900
ANGPT2	Homo sapiens angiopoietin 2 (ANGPT2), transcript variant 1, mRNA [NM_001147]	1.98257	4.53634	15.9203	54.2627	-1.16691	0.32919	-0.0266619	1.79742	A_23_P60079
ANGPT2	angiopoietin 2 [Source:HGNC Symbol;Acc:485] [ENST00000325203]	2.0445	1.8259	3.35456	3.91094	0.242753	0.381556	-0.908047	-0.631666	A_24_P367900
ANGPT2	Homo sapiens angiopoietin 2 (ANGPT2), transcript variant 1, mRNA [NM_001147]	2.13303	1.83447	3.18883	6.07493	0.42348	0.507889	-0.861574	0.123259	A_24_P932435
ANGPT4	Homo sapiens angiopoietin 4 (ANGPT4), mRNA [NM_015985]	11.6598	5.43263	8.77686	12.1283	0.913539	0.113664	-1.3614	-0.839819	A_23_P68511
ANGPTL1	Homo sapiens angiopoietin-like 1 (ANGPTL1), mRNA [NM_004673]	118.535	66.8295	3.15703	523.049	3.7586	3.23378	-3.33718	4.09004	A_23_P126706
ANGPTL1	Homo sapiens angiopoietin-like 1 (ANGPTL1), mRNA [NM_004673]	11.2138	4.31621	3.04035	7.27211	2.71978	1.64429	-1.02836	0.284769	A_24_P199484
ANGPTL2	Homo sapiens angiopoietin-like 2 (ANGPTL2), mRNA [NM_012098]	7729.22	4623.03	33.5637	4760.03	4.49083	4.0513	-5.22162	1.9813	A_23_P20864
ANGPTL2	Homo sapiens angiopoietin-like 2 (ANGPTL2), mRNA [NM_012098]	2282.69	1715.67	3.53451	831.711	4.82558	4.71556	-6.37461	1.55881	A_23_P374104
ANGPTL3	Homo sapiens angiopoietin-like 3 (ANGPTL3), mRNA [NM_014495]	2.02734	1.79511	3.47162	4.23129	0.389701	0.516132	-0.699456	-0.358978	A_23_P160262
ANGPTL4	Homo sapiens angiopoietin-like 4 (ANGPTL4), transcript variant 1, mRNA [NM_139314]	1360.34	5237.76	789.872	22176.8	2.79436	5.04129	0.144906	5.01119	A_23_P159325
ANGPTL5	Homo sapiens angiopoietin-like 5 (ANGPTL5), mRNA [NM_178127]	45.7844	95.5452	3.50029	4.3322	4.74241	6.10569	-0.832075	-0.469461	A_23_P64161
ANGPTL6	Homo sapiens angiopoietin-like 6 (ANGPTL6), mRNA [NM_031917]	13.8154	23.1868	60.5109	89.3509	-0.095623	0.95335	0.170115	0.787393	A_23_P50276
ANGPTL7	Homo sapiens angiopoietin-like 7 (ANGPTL7), mRNA [NM_021146]	2.09665	1.78943	3.83239	13.8686	0.21259	0.285952	-0.782426	1.12807	A_23_P114862
ANHX	Homo sapiens anomalous homeobox (ANHX), mRNA [NM_001191054]	1.82484	1.65057	9.85227	3.83975	0.404719	0.561862	0.972229	-0.332225	A_24_P922849
ANK1	Homo sapiens ankyrin 1, erythrocytic (ANK1), transcript variant 3, mRNA [NM_000037]	33.6116	34.781	156.872	177.463	-0.985812	-0.634525	-0.62843	-0.395507	A_23_P216108
ANK1	Homo sapiens ankyrin 1, erythrocytic (ANK1), transcript variant 3, mRNA [NM_000037]	6.99113	11.2422	25.1726	52.2914	-1.16987	-0.182597	-1.18679	-0.0770798	A_24_P162485
ANK1	Homo sapiens ankyrin 1, erythrocytic (ANK1), transcript variant 3, mRNA [NM_000037]	2.17905	1.89828	3.59426	4.41216	-0.00915527	0.0937858	-1.15234	-0.801556	A_24_P162483
ANK2	Homo sapiens ankyrin 2, neuronal (ANK2), transcript variant 1, mRNA [NM_001148]	54.9877	43.1393	7.20091	124.369	2.63025	2.5821	-2.16778	1.99752	A_23_P133068
ANK3	Homo sapiens ankyrin 3, node of Ranvier (ankyrin G) (ANK3), transcript variant 1, mRNA [NM_020987]	32.6745	55.444	116.385	1559.71	0	1.06481	-0.0325108	3.76678	A_23_P202269
ANK3	Homo sapiens ankyrin 3, node of Ranvier (ankyrin G) (ANK3), transcript variant 2, mRNA [NM_001149]	4.18183	3.27344	3.44267	19.0793	1.01547	0.964091	-1.13031	1.39509	A_24_P162173
ANK3	Homo sapiens ankyrin 3, node of Ranvier (ankyrin G) (ANK3), transcript variant 4, mRNA [NM_001204404]	2.08767	3.58885	3.42163	11.4254	0.198395	1.28197	-0.953992	0.840491	A_32_P33304
ANK3	Homo sapiens ankyrin 3, node of Ranvier (ankyrin G) (ANK3), transcript variant 1, mRNA [NM_020987]	15.024	19.9511	85.1356	1042.08	-0.469013	0.242128	0.168301	3.83686	A_23_P301530
ANKAR	Homo sapiens ankyrin and armadillo repeat containing (ANKAR), mRNA [NM_144708]	47.2281	38.5552	156.004	200.062	-0.152743	-0.143517	-0.294057	0.119798	A_23_P370544
ANKDD1A	ankyrin repeat and death domain containing 1A [Source:HGNC Symbol;Acc:28002] [ENST00000496660]	46.9469	27.4065	934.306	442.725	-0.586237	-1.0608	1.86338	0.840888	A_24_P306034
ANKDD1A	Homo sapiens ankyrin repeat and death domain containing 1A (ANKDD1A), mRNA [NM_182703]	18.5089	8.39952	64.9629	9.8598	1.43166	0.593772	1.37788	-1.28711	A_24_P82155
ANKEF1	Homo sapiens ankyrin repeat and EF-hand domain containing 1 (ANKEF1), transcript variant 1, mRNA [NM_022096]	43.1794	64.6401	146.617	128.641	-0.236655	0.647376	-0.338194	-0.471906	A_23_P256047
ANKEF1	Homo sapiens ankyrin repeat and EF-hand domain containing 1 (ANKEF1), transcript variant 1, mRNA [NM_022096]	38.3755	28.7571	120.184	85.1776	0.218189	0.103869	0	-0.441709	A_23_P365086
ANKFN1	Homo sapiens ankyrin-repeat and fibronectin type III domain containing 1 (ANKFN1), mRNA [NM_153228]	5.83646	1.76103	5.5791	4.83694	1.55603	0.129299	-0.374209	-0.525156	A_23_P350698
ANKFY1	ankyrin repeat and FYVE domain containing 1 [Source:HGNC Symbol;Acc:20763] [ENST00000433651]	70.432	63.4512	1052.15	406.945	-1.46764	-1.31628	0.568147	-0.747298	A_24_P151834
ANKFY1	Homo sapiens ankyrin repeat and FYVE domain containing 1 (ANKFY1), transcript variant 1, mRNA [NM_016376]	482.869	596.517	4206.24	2641.67	-0.543702	0.0631752	0.713945	0.0978575	A_23_P207620
ANKH	Homo sapiens ANKH inorganic pyrophosphate transport regulator (ANKH), mRNA [NM_054027]	84.7323	1053.57	348.933	344.075	0.561459	4.49964	0.738247	0.773012	A_24_P303145
ANKH	Homo sapiens ANKH inorganic pyrophosphate transport regulator (ANKH), mRNA [NM_054027]	104.508	323.512	592.963	557.969	0	1.93215	0.639148	0.606381	A_23_P213766
ANKH	Homo sapiens ANKH inorganic pyrophosphate transport regulator (ANKH), mRNA [NM_054027]	51.0237	242.863	158.058	220.725	0.293716	2.84657	0.0597515	0.596541	A_24_P371628
ANKHD1	Homo sapiens ankyrin repeat and KH domain containing 1 (ANKHD1), transcript variant 1, mRNA [NM_017747]	28.0756	30.3366	180.484	77.5095	-0.206918	0.206771	0.612388	-0.552047	A_24_P50875
ANKHD1	Homo sapiens ankyrin repeat and KH domain containing 1 (ANKHD1), transcript variant 1, mRNA [NM_017747]	389.394	264.421	6046.45	4724.52	-1.92895	-2.18539	0.162661	-0.138268	A_24_P323265
ANKHD1	Homo sapiens ankyrin repeat and KH domain containing 1 (ANKHD1), transcript variant 3, mRNA [NM_024668]	597.292	410.718	7941.81	1556.55	-1.10813	-1.34647	0.759653	-1.53647	A_23_P92642
ANKHD1	Homo sapiens ankyrin repeat and KH domain containing 1 (ANKHD1), transcript variant 1, mRNA [NM_017747]	511.346	422.605	3590.48	2854.15	-0.873833	-0.846876	0.0727949	-0.20333	A_23_P213326
ANKHD1-EIF4EBP3	Homo sapiens ANKHD1-EIF4EBP3 readthrough (ANKHD1-EIF4EBP3), mRNA [NM_020690]	575.075	313.555	1057.62	1254.38	0.168631	-0.404454	-0.817544	-0.516408	A_23_P58443
ANKIB1	Homo sapiens ankyrin repeat and IBR domain containing 1 (ANKIB1), mRNA [NM_019004]	1024.56	507.448	2238.42	2264.01	0.214993	-0.496737	-0.522711	-0.451324	A_24_P18020
ANKIB1	Homo sapiens ankyrin repeat and IBR domain containing 1 (ANKIB1), mRNA [NM_019004]	34.9874	22.2111	208.827	229.992	-0.424988	-0.7786	0.287233	0.4815	A_23_P93912
ANKIB1	Homo sapiens ankyrin repeat and IBR domain containing 1 (ANKIB1), mRNA [NM_019004]	494.053	324.385	1409.11	1774.95	0.144042	-0.160971	-0.209092	0.178902	A_23_P355623
ANKK1	Homo sapiens ankyrin repeat and kinase domain containing 1 (ANKK1), mRNA [NM_178510]	2895.11	1824.63	86223.8	54988.4	-2.45245	-2.81652	0.578766	-0.0152006	A_23_P35943
ANKLE1	Homo sapiens ankyrin repeat and LEM domain containing 1 (ANKLE1), transcript variant 1, mRNA [NM_152363]	6.96538	7.59621	19.9429	21.1704	-0.781341	-0.354316	-1.12891	-0.987752	A_23_P142497
ANKLE2	Homo sapiens ankyrin repeat and LEM domain containing 2 (ANKLE2), mRNA [NM_015114]	283.5	285.271	1816.09	2063.66	-0.57473	-0.263803	0.239507	0.478868	A_23_P10858
ANKMY1	Homo sapiens ankyrin repeat and MYND domain containing 1 (ANKMY1), transcript variant 2, mRNA [NM_017844]	15.3457	23.9064	83.5761	48.3903	-0.477311	0.464199	0.102766	-0.630615	A_24_P402106
ANKMY1	Homo sapiens ankyrin repeat and MYND domain containing 1 (ANKMY1), transcript variant 1, mRNA [NM_016552]	10.1282	12.9481	90.7175	81.4363	-1.70308	-1.04677	-0.405251	-0.505969	A_23_P131463
ANKMY1	ankyrin repeat and MYND domain containing 1 [Source:HGNC Symbol;Acc:20987] [ENST00000480230]	41.0677	59.4588	142.021	45.2827	0.392159	1.22799	0.317014	-1.27707	A_24_P940863
ANKMY2	Homo sapiens ankyrin repeat and MYND domain containing 2 (ANKMY2), mRNA [NM_020319]	213.207	219.957	988.783	648.894	0.204456	0.551373	0.552681	0	A_23_P20002
ANKRA2	Homo sapiens ankyrin repeat, family A (RFXANK-like), 2 (ANKRA2), mRNA [NM_023039]	275.788	295.14	401.84	1642.59	-0.14089	0.258897	-1.46301	0.623264	A_24_P337397
ANKRA2	Homo sapiens ankyrin repeat, family A (RFXANK-like), 2 (ANKRA2), mRNA [NM_023039]	346.775	375.779	385.518	1354.74	0.202284	0.620114	-1.5101	0.35804	A_23_P41634
ANKRA2	Homo sapiens ankyrin repeat, family A (RFXANK-like), 2 (ANKRA2), mRNA [NM_023039]	3340.33	2747.91	1313.51	5438.28	1.44591	1.4662	-1.76583	0.338885	A_23_P159012
ANKRD1	Homo sapiens ankyrin repeat domain 1 (cardiac muscle) (ANKRD1), mRNA [NM_014391]	2.89822	1.71693	482.76	360.947	-5.15029	-5.60368	0.364529	0	A_23_P161218
ANKRD10	Homo sapiens ankyrin repeat domain 10 (ANKRD10), transcript variant 1, mRNA [NM_017664]	290.277	453.296	4427.75	1361.01	-2.06569	-1.12073	0.000196457	-1.6467	A_24_P298077
ANKRD10	Homo sapiens ankyrin repeat domain 10 (ANKRD10), transcript variant 1, mRNA [NM_017664]	100.014	252.237	908.653	1020.34	-1.42441	0.212118	-0.106054	0.116179	A_23_P205046
ANKRD11	Homo sapiens cDNA FLJ36443 fis, clone THYMU2012891. [AK093762]	1.97478	1.68229	29.7819	30.8575	-1.92935	-1.85867	0.120147	0.226325	A_24_P929449
ANKRD11	Homo sapiens ankyrin repeat domain 11 (ANKRD11), transcript variant 2, mRNA [NM_013275]	1801.63	1524.36	5395.64	6756.41	-0.150981	-0.0901356	-0.433664	-0.0542107	A_23_P163639
ANKRD11	Homo sapiens ankyrin repeat domain 11 (ANKRD11), transcript variant 2, mRNA [NM_013275]	970.688	681.059	9890.34	13599.4	-1.48376	-1.69304	0	0.514442	A_32_P82403
ANKRD11	Homo sapiens ankyrin repeat domain 11 (ANKRD11), transcript variant 2, mRNA [NM_013275]	3977.83	2543.77	9942.45	10555.9	-0.0682278	-0.411293	-0.611785	-0.470414	A_23_P3632
ANKRD11	Homo sapiens ankyrin repeat domain 11 (ANKRD11), transcript variant 2, mRNA [NM_013275]	8.50669	8.35482	563.979	588.252	-3.11185	-2.83589	1.07388	1.18966	A_24_P324405
ANKRD12	Homo sapiens ankyrin repeat domain 12 (ANKRD12), transcript variant 1, mRNA [NM_015208]	78.3334	43.3426	790.844	886.17	-1.15715	-1.70905	0.313366	0.532547	A_24_P179183
ANKRD12	Homo sapiens ankyrin repeat domain 12 (ANKRD12), transcript variant 1, mRNA [NM_015208]	292.574	239.558	1262.6	2226.39	-0.244348	-0.230828	0	0.873299	A_24_P133991
ANKRD12	Homo sapiens ankyrin repeat domain 12 (ANKRD12), transcript variant 1, mRNA [NM_015208]	72.6781	53.447	160.564	215.179	0.775698	0.634232	0.0540738	0.53146	A_23_P130293
ANKRD12	Homo sapiens ankyrin repeat domain 12 (ANKRD12), transcript variant 1, mRNA [NM_015208]	181.065	109.322	232.074	271.317	0.871017	0.445047	-0.63608	-0.355694	A_24_P25252
ANKRD13A	Homo sapiens ankyrin repeat domain 13A (ANKRD13A), mRNA [NM_033121]	9062.71	2625.9	4958.13	6132.19	2.38165	0.896462	-0.353678	0.00792026	A_24_P98975
ANKRD13A	Homo sapiens ankyrin repeat domain 13A (ANKRD13A), mRNA [NM_033121]	848.849	130.482	668.547	812.973	2.1295	-0.270208	-0.0801525	0.257016	A_24_P307572
ANKRD13B	Homo sapiens ankyrin repeat domain 13B (ANKRD13B), mRNA [NM_152345]	20.1684	43.5545	114.736	90.0926	-1.41267	0	-0.769704	-1.06355	A_23_P380881
ANKRD13C	Homo sapiens ankyrin repeat domain 13C (ANKRD13C), mRNA [NM_030816]	840.188	735.714	1639.37	1516.07	0.786147	0.896526	-0.114673	-0.17249	A_23_P114616
ANKRD13D	Homo sapiens ankyrin repeat domain 13 family, member D (ANKRD13D), transcript variant 1, mRNA [NM_207354]	93.2792	124.271	457.705	292.872	-0.511893	0.20392	-0.0822792	-0.671437	A_24_P76105
ANKRD13D	Homo sapiens ankyrin repeat domain 13 family, member D (ANKRD13D), transcript variant 1, mRNA [NM_207354]	233.04	292.953	672.513	413.422	-0.215122	0.416915	-0.551316	-1.19827	A_24_P349356
ANKRD16	Homo sapiens ankyrin repeat domain 16 (ANKRD16), transcript variant 4, mRNA [NM_001009943]	482.58	357.098	1503.55	729.641	0.415329	0.282828	0.189682	-0.798438	A_23_P150069
ANKRD17	Homo sapiens ankyrin repeat domain 17 (ANKRD17), transcript variant 1, mRNA [NM_032217]	1864.35	1046.16	5464.17	5117.58	0.275773	-0.255851	-0.0380726	-0.0776215	A_23_P144378
ANKRD17	Homo sapiens ankyrin repeat domain 17 (ANKRD17), transcript variant 1, mRNA [NM_032217]	3.34576	1.70997	58.6851	54.5818	-0.722945	-1.38936	1.54446	1.49488	A_24_P220771
ANKRD17	Homo sapiens ankyrin repeat domain 17 (ANKRD17), transcript variant 1, mRNA [NM_032217]	517.721	376.364	1585.24	1666.52	0.376099	0.218	0.125373	0.252501	A_24_P195998
ANKRD18A	Homo sapiens ankyrin repeat domain 18A (ANKRD18A), mRNA [NM_147195]	7.35665	3.2532	1252.5	21.6462	-1.40169	-2.27693	4.14467	-1.65489	A_32_P101490
ANKRD18B	Homo sapiens ankyrin repeat domain 18B (ANKRD18B), mRNA [NM_001244752]	14.126	23.1982	1096.72	46.6616	0.0728903	1.0905	4.48641	-0.0134182	A_24_P160773
ANKRD18CP	PREDICTED: Homo sapiens ankyrin repeat domain 18C, pseudogene (ANKRD18CP), misc_RNA [XR_426432]	4.9366	7.63212	545.803	25.4034	-0.889755	0.0407581	4.03379	-0.336511	A_24_P306585
ANKRD18DP	Homo sapiens ankyrin repeat domain 18D, pseudogene (ANKRD18DP), non-coding RNA [NR_003291]	1.8371	1.83551	7.55399	4.55199	-0.273202	0.0274935	-0.0985699	-0.774319	A_24_P211894
ANKRD19P	Homo sapiens ankyrin repeat domain 19, pseudogene (ANKRD19P), non-coding RNA [NR_026868]	1.88359	3.70518	14.557	13.3942	0	1.278	1.08498	1.01986	A_23_P312565
ANKRD2	Homo sapiens ankyrin repeat domain 2 (stretch responsive muscle) (ANKRD2), transcript variant 1, mRNA [NM_020349]	13.67	48.1072	73.2334	126.319	-1.39779	0.719391	-0.841484	0	A_23_P104555
ANKRD2	Homo sapiens ankyrin repeat domain 2 (stretch responsive muscle) (ANKRD2), transcript variant 1, mRNA [NM_020349]	64.0349	68.6228	2405.11	2290.4	-2.22493	-1.82315	1.14099	1.12548	A_24_P188116
ANKRD20A11P	Homo sapiens ankyrin repeat domain 20 family, member A11, pseudogene (ANKRD20A11P), non-coding RNA [NR_027270]	7.27745	1.6919	254.323	146.426	-0.898946	-2.70179	2.36296	1.62146	A_23_P392529
ANKRD20A12P	Homo sapiens ankyrin repeat domain 20 family, member A12, pseudogene (ANKRD20A12P), non-coding RNA [NR_046228]	2.10989	1.82607	11.4216	7.23827	-0.420821	-0.327299	0.150535	-0.452528	A_32_P109604
ANKRD20A12P	Homo sapiens ankyrin repeat domain 20 family, member A12, pseudogene (ANKRD20A12P), non-coding RNA [NR_046228]	7.84872	20.8143	18.2136	369.891	-2.88727	-1.17827	-3.53795	0.861046	A_32_P79190
ANKRD20A12P	Homo sapiens ankyrin repeat domain 20 family, member A12, pseudogene (ANKRD20A12P), non-coding RNA [NR_046228]	3.14532	1.92924	3.9108	3.98457	0.753718	0.350494	-0.7972	-0.715252	A_24_P187056
ANKRD20A12P	Homo sapiens ankyrin repeat domain 20 family, member A12, pseudogene (ANKRD20A12P), non-coding RNA [NR_046228]	11.6258	47.6368	16.0913	717.684	-2.33669	0	-3.73292	1.80107	A_24_P778906
ANKRD20A2	Homo sapiens ankyrin repeat domain 20 family, member A2 (ANKRD20A2), mRNA [NM_001012421]	2.0526	1.79631	134.01	13.6815	-1.53338	-1.42385	2.6302	-0.606857	A_32_P204376
ANKRD20A2	Homo sapiens ankyrin repeat domain 20 family, member A2 (ANKRD20A2), mRNA [NM_001012421]	4.94112	2.56404	133.598	23.3686	-1.25934	-1.90381	1.63241	-0.827863	A_24_P64241
ANKRD20A2	Homo sapiens ankyrin repeat domain 20 family, member A2 (ANKRD20A2), mRNA [NM_001012421]	12.995	13.1448	144.641	58.132	-1.25195	-0.933462	0.359321	-0.900756	A_32_P168326
ANKRD20A2	Homo sapiens ankyrin repeat domain 20 family, member A2 (ANKRD20A2), mRNA [NM_001012421]	10.0158	8.28029	152.687	57.0805	-1.1767	-1.14927	0.888358	-0.476159	A_24_P868583
ANKRD20A2	Homo sapiens ankyrin repeat domain 20 family, member A2 (ANKRD20A2), mRNA [NM_001012421]	2.11858	1.80722	102.219	16.3928	-1.37928	-1.30665	2.34797	-0.237568	A_23_P216889
ANKRD20A2	Homo sapiens ankyrin repeat domain 20 family, member A2 (ANKRD20A2), mRNA [NM_001012421]	2.03335	1.89827	164.58	20.8913	-2.62811	-2.42534	1.8455	-1.07732	A_32_P66222
ANKRD20A3	ankyrin repeat domain 20 family, member A3 [Source:HGNC Symbol;Acc:31981] [ENST00000344538]	2.03224	1.80714	7.03973	14.3484	-0.0451975	0.0873933	-0.117923	0.964362	A_32_P4792
ANKRD20A5P	Homo sapiens ankyrin repeat domain 20 family, member A5, pseudogene (ANKRD20A5P), non-coding RNA [NR_040113]	2.06284	1.80503	960.536	52.846	-3.82835	-3.71901	3.16954	-0.959445	A_32_P68942
ANKRD20A5P	Homo sapiens ankyrin repeat domain 20 family, member A5, pseudogene (ANKRD20A5P), non-coding RNA [NR_040113]	1.87411	1.6876	70.0214	12.319	-2.46198	-2.31127	0.89636	-1.55556	A_32_P150086
ANKRD20A5P	Homo sapiens ankyrin repeat domain 20 family, member A5, pseudogene (ANKRD20A5P), non-coding RNA [NR_040113]	1.92607	1.72188	62.2183	3.97045	-0.473354	-0.333081	2.67508	-1.2399	A_32_P68293
ANKRD20A5P	ankyrin repeat domain 20 family, member A8, pseudogene [Source:HGNC Symbol;Acc:23666] [ENST00000590226]	2.02997	1.79232	72.6987	3.88443	-0.335243	-0.212927	2.96197	-1.20919	A_24_P851132
ANKRD20A9P	Homo sapiens ankyrin repeat domain 20 family, member A9, pseudogene (ANKRD20A9P), non-coding RNA [NR_027995]	2.06445	1.80346	39.6287	4.25351	0.305004	0.411961	2.70255	-0.462283	A_24_P84220
ANKRD20A9P	Homo sapiens ankyrin repeat domain 20 family, member A9, pseudogene (ANKRD20A9P), non-coding RNA [NR_027995]	2.14488	2.62619	14.5393	29.8534	-1.24172	-0.647699	-0.34591	0.747019	A_32_P13151
ANKRD22	Homo sapiens ankyrin repeat domain 22 (ANKRD22), mRNA [NM_144590]	6.54891	1.67954	3.24283	65.6902	0.728674	-0.93257	-2.1505	2.24484	A_23_P161428
ANKRD23	Homo sapiens ankyrin repeat domain 23 (ANKRD23), mRNA [NM_144994]	300.401	84.5354	480.376	202.775	1.20793	-0.319382	0.0200291	-1.16926	A_23_P305120
ANKRD24	Homo sapiens ankyrin repeat domain 24 (ANKRD24), mRNA [NM_133475]	11.8633	9.24865	18.9709	67.4192	1.18789	1.13065	0	1.88436	A_32_P191786
ANKRD24	Homo sapiens ankyrin repeat domain 24 (ANKRD24), mRNA [NM_133475]	1.91593	1.68808	3.17845	3.97636	-0.0723228	0.0469608	-1.20722	-0.829105	A_32_P451874
ANKRD26	Homo sapiens ankyrin repeat domain 26 (ANKRD26), transcript variant 1, mRNA [NM_014915]	173.04	118.554	770.964	464.536	0.130183	-0.113433	0.420559	-0.255322	A_23_P115597
ANKRD26	Homo sapiens ankyrin repeat domain 26 (ANKRD26), transcript variant 1, mRNA [NM_014915]	52.4906	17.7621	336.301	194.968	-0.279336	-1.54065	0.535109	-0.196416	A_24_P136438
ANKRD26	Homo sapiens ankyrin repeat domain 26 (ANKRD26), transcript variant 2, mRNA [NM_001256053]	14.7768	6.35359	95.6552	99.3803	-0.386575	-1.30231	0.442761	0.552869	A_24_P85511
ANKRD27	Homo sapiens ankyrin repeat domain 27 (VPS9 domain) (ANKRD27), mRNA [NM_032139]	552.369	459.091	5146.14	3076.97	-0.667617	-0.632524	0.686992	0	A_23_P153640
ANKRD28	Homo sapiens ankyrin repeat domain 28 (ANKRD28), transcript variant 1, mRNA [NM_015199]	60.3041	52.7737	223.434	84.0455	0.322007	0.431517	0.346349	-1.00927	A_23_P109794
ANKRD28	Homo sapiens ankyrin repeat domain 28 (ANKRD28), transcript variant 1, mRNA [NM_015199]	1592.24	1237.16	2838.24	1937.06	0.557605	0.49553	-0.473632	-0.969766	A_24_P217365
ANKRD29	Homo sapiens ankyrin repeat domain 29 (ANKRD29), mRNA [NM_173505]	1097.88	582.514	147.551	1855.16	2.98181	2.36941	-1.7788	1.92845	A_23_P412577
ANKRD30A	Homo sapiens ankyrin repeat domain 30A (ANKRD30A), mRNA [NM_052997]	2.05107	1.76566	3.58798	4.48186	0.204987	0.290761	-0.853399	-0.47748	A_23_P12533
ANKRD30B	Homo sapiens ankyrin repeat domain 30B (ANKRD30B), mRNA [NM_001145029]	2.12306	1.82374	23.1729	189.355	-1.86151	-1.77881	-0.278468	2.80711	A_24_P221007
ANKRD30BL	Homo sapiens ankyrin repeat domain 30B-like (ANKRD30BL), transcript variant 1, non-coding RNA [NR_027019]	1.77795	1.81827	3.89603	7.90548	-0.334301	0	-1.06769	0.00815344	A_24_P281665
ANKRD30BP2	Homo sapiens ankyrin repeat domain 30B pseudogene 2 (ANKRD30BP2), non-coding RNA [NR_026916]	2.059	1.79113	3.44387	4.31563	0.032176	0.133046	-1.09092	-0.710387	A_24_P917819
ANKRD30BP2	Homo sapiens ankyrin repeat domain 30B pseudogene 2 (ANKRD30BP2), non-coding RNA [NR_026916]	1.99622	1.78749	3.26733	8.97757	-0.142611	0	-1.29695	0.216256	A_23_P321496
ANKRD30BP3	Homo sapiens ankyrin repeat domain 30B pseudogene 3 (ANKRD30BP3), non-coding RNA [NR_033891]	3.17325	3.73761	3.27268	4.14931	0.842523	1.38062	-0.978146	-0.580756	A_32_P192765
ANKRD31	Homo sapiens ankyrin repeat domain 31 (ANKRD31), mRNA [NM_001164443]	2.05382	1.76761	13.908	18.1527	0.149962	0.235397	1.04432	1.48358	A_24_P357647
ANKRD32	Homo sapiens ankyrin repeat domain 32 (ANKRD32), mRNA [NM_032290]	658.929	550.366	1850.21	860.256	-0.367344	-0.32513	-0.743031	-1.79289	A_23_P144684
ANKRD32	Homo sapiens ankyrin repeat domain 32 (ANKRD32), mRNA [NM_032290]	58.634	31.0967	395.264	137.568	-1.21749	-1.83052	-0.329659	-1.79734	A_24_P212072
ANKRD33	Homo sapiens ankyrin repeat domain 33 (ANKRD33), transcript variant 2, mRNA [NM_182608]	8.06717	6.28083	177.107	172.221	-1.82011	-1.87927	0.771123	0.785752	A_32_P516342
ANKRD33B	Homo sapiens ankyrin repeat domain 33B (ANKRD33B), mRNA [NM_001164440]	30.4397	19.505	651.441	662.496	-0.264386	-0.604545	2.29005	2.36932	A_24_P83799
ANKRD33B	Homo sapiens ankyrin repeat domain 33B (ANKRD33B), mRNA [NM_001164440]	833.337	164.317	3423.38	167.665	0.924084	-1.11639	1.09735	-3.19942	A_32_P137604
ANKRD34A	Homo sapiens ankyrin repeat domain 34A (ANKRD34A), mRNA [NM_001039888]	34.4088	52.5507	78.5016	165.168	0.540486	1.45336	-0.134749	0.99338	A_24_P212811
ANKRD34B	Homo sapiens ankyrin repeat domain 34B (ANKRD34B), mRNA [NM_001004441]	4.58054	1.83274	4.03927	4.42363	1.22645	0.206878	-0.820152	-0.634025	A_24_P916073
ANKRD35	Homo sapiens ankyrin repeat domain 35 (ANKRD35), transcript variant 1, mRNA [NM_144698]	2130.88	2244.28	25.3298	1887.9	7.03763	7.41438	-1.22202	5.05277	A_23_P325690
ANKRD36	Homo sapiens ankyrin repeat domain 36 (ANKRD36), mRNA [NM_001164315]	40.3922	25.2113	4196.98	2407.47	-3.31731	-3.69537	1.51664	0.769796	A_24_P6725
ANKRD36	Homo sapiens ankyrin repeat domain 36 (ANKRD36), mRNA [NM_001164315]	25.107	10.0213	1382.68	1029.41	-2.7509	-3.77398	1.16715	0.796494	A_24_P203630
ANKRD36	Homo sapiens ankyrin repeat domain 36 (ANKRD36), mRNA [NM_001164315]	15.8637	13.9918	2517.11	1191.55	-3.79736	-3.67656	1.64735	0.623411	A_24_P686992
ANKRD36	Homo sapiens ankyrin repeat domain 36 (ANKRD36), mRNA [NM_001164315]	26.5294	7.31966	522.878	198.905	-1.01637	-2.57217	1.41926	0.0798531	A_24_P336931
ANKRD36B	Homo sapiens cDNA: FLJ21281 fis, clone COL01904. [AK024934]	37.2204	24.5643	1192.2	857.591	-1.91713	-2.21472	1.21908	0.798803	A_23_P253622
ANKRD36B	Homo sapiens CLL-associated antigen KW-1 splice variant 2 mRNA, partial cds; alternatively spliced. [AF432209]	2.15077	1.84751	26.5158	9.02131	-0.0826721	0	1.67608	0.175625	A_24_P324749
ANKRD36B	Homo sapiens ankyrin repeat domain 36B (ANKRD36B), mRNA [NM_025190]	14.3105	7.66269	1032.09	491.332	-3.12149	-3.7207	1.18568	0.169871	A_24_P135092
ANKRD36BP1	Homo sapiens ankyrin repeat domain 36B pseudogene 1 (ANKRD36BP1), non-coding RNA [NR_026844]	149.54	113.361	697.714	510.94	0.0869899	-0.0106759	0.443913	0.0494223	A_23_P97123
ANKRD36BP2	Homo sapiens ankyrin repeat domain 36B pseudogene 2 (ANKRD36BP2), non-coding RNA [NR_015424]	10.5015	10.6726	1064.52	717.812	-3.04241	-2.71714	1.75588	1.24235	A_32_P126467
ANKRD36BP2	Homo sapiens ankyrin repeat domain 36B pseudogene 2 (ANKRD36BP2), non-coding RNA [NR_015424]	40.5871	22.483	1183.16	642.967	-2.17546	-2.7257	0.824838	0	A_24_P341089
ANKRD37	Homo sapiens ankyrin repeat domain 37 (ANKRD37), mRNA [NM_181726]	307.405	357.265	1884.58	5021.57	-1.17657	-0.657764	-0.425707	1.04318	A_24_P237586
ANKRD39	Homo sapiens ankyrin repeat domain 39 (ANKRD39), mRNA [NM_016466]	429.366	287.401	2014.47	969.284	-0.67017	-0.947365	-0.305227	-1.30564	A_23_P95027
ANKRD40	Homo sapiens ankyrin repeat domain 40 (ANKRD40), mRNA [NM_052855]	64.2201	58.6125	594.658	198.272	-0.506743	-0.336614	0.839043	-0.690547	A_23_P15580
ANKRD42	Homo sapiens ankyrin repeat domain 42 (ANKRD42), mRNA [NM_182603]	36.8165	32.948	53.0955	253.491	0.887545	1.02933	-0.449397	1.86087	A_24_P357572
ANKRD42	Homo sapiens ankyrin repeat domain 42 (ANKRD42), mRNA [NM_182603]	204.61	162.374	137.914	796.474	1.60049	1.56888	-0.833792	1.75106	A_32_P69166
ANKRD44	ankyrin repeat domain 44 [Source:HGNC Symbol;Acc:25259] [ENST00000328737]	2.23235	1.95453	3.49773	4.03156	0.51302	0.62322	-0.704305	-0.444394	A_24_P128713
ANKRD44	Homo sapiens ankyrin repeat domain 44 (ANKRD44), transcript variant B, mRNA [NM_153697]	26.6766	18.0124	148.32	42.208	0.747921	0.483282	1.35781	-0.400327	A_23_P209347
ANKRD45	Homo sapiens ankyrin repeat domain 45 (ANKRD45), mRNA [NM_198493]	10.9922	7.33223	3.12667	6.14663	1.27569	0.993491	-2.40326	-1.3731	A_24_P307498
ANKRD46	ankyrin repeat domain 46 [Source:HGNC Symbol;Acc:27229] [ENST00000524319]	88.9279	62.7596	4356.92	8600.83	-1.84896	-2.04981	1.90039	2.93655	A_24_P662086
ANKRD46	Homo sapiens ankyrin repeat domain 46 (ANKRD46), transcript variant 2, mRNA [NM_198401]	301.524	339.431	574.914	712.829	0.208929	0.68172	-0.725176	-0.359975	A_23_P94095
ANKRD49	Homo sapiens ankyrin repeat domain 49 (ANKRD49), mRNA [NM_017704]	508.481	487.709	2577.5	1480.06	-0.438099	-0.196326	0.0384293	-0.706898	A_23_P24365
ANKRD50	Homo sapiens ankyrin repeat domain 50 (ANKRD50), transcript variant 1, mRNA [NM_020337]	6.40975	8.1753	237.582	180.524	-1.75751	-1.10455	1.58933	1.24809	A_23_P81017
ANKRD50	Homo sapiens ankyrin repeat domain 50 (ANKRD50), transcript variant 1, mRNA [NM_020337]	10.6785	6.89935	99.5286	56.6299	-0.661007	-0.98924	0.694215	-0.0643406	A_24_P912818
ANKRD52	Homo sapiens ankyrin repeat domain 52 (ANKRD52), mRNA [NM_173595]	2.04681	1.77616	5.23388	4.36223	-0.0973358	0	-0.608007	-0.815831	A_24_P172600
ANKRD53	Homo sapiens ankyrin repeat domain 53 (ANKRD53), transcript variant 2, mRNA [NM_024933]	9.47732	6.24793	144.909	122.728	-1.11419	-1.41335	0.955157	0.770459	A_24_P371184
ANKRD53	Homo sapiens ankyrin repeat domain 53 (ANKRD53), transcript variant 2, mRNA [NM_024933]	9.13448	8.88402	25.9178	22.855	0.644074	0.90591	0.283443	0.157005	A_24_P162979
ANKRD54	ankyrin repeat domain 54 [Source:HGNC Symbol;Acc:25185] [ENST00000609706]	309.402	206.215	399.582	682.45	0.727362	0.443977	-0.768805	0.0584183	A_32_P223441
ANKRD54	Homo sapiens ankyrin repeat domain 54 (ANKRD54), transcript variant 1, mRNA [NM_138797]	91.0785	85.5433	762.893	723.508	-0.98625	-0.77476	0.214871	0.19339	A_23_P120921
ANKRD54	Homo sapiens ankyrin repeat domain 54 (ANKRD54), transcript variant 1, mRNA [NM_138797]	1016.43	622.923	3017.46	3297.69	0.295351	-0.109084	0	0.183115	A_23_P120915
ANKRD55	Homo sapiens ankyrin repeat domain 55 (ANKRD55), mRNA [NM_024669]	61.731	23.3512	3.99764	6.71445	4.34796	3.2474	-1.46599	-0.662884	A_23_P258483
ANKRD6	Homo sapiens ankyrin repeat domain 6 (ANKRD6), transcript variant 2, mRNA [NM_001242811]	30.1137	32.6602	370.548	738.063	-1.98129	-1.56223	-0.225302	0.823772	A_23_P70297
ANKRD6	Homo sapiens ankyrin repeat domain 6 (ANKRD6), transcript variant 3, mRNA [NM_014942]	3.1683	3.8819	167.549	315.834	-3.67524	-3.08024	0.184317	1.15389	A_24_P146188
ANKRD60	ankyrin repeat domain 60 [Source:HGNC Symbol;Acc:16217] [ENST00000457363]	2.23778	1.92531	3.23199	4.05437	0.48497	0.569941	-0.849854	-0.467806	A_23_P131875
ANKRD62	Homo sapiens ankyrin repeat domain 62 (ANKRD62), mRNA [NM_001277333]	1.89697	1.69271	3.29367	3.91387	0.398876	0.536466	-0.6703	-0.366406	A_24_P843604
ANKRD65	Homo sapiens ankyrin repeat domain 65 (ANKRD65), transcript variant 1, mRNA [NM_001145210]	44.71	9.75492	5.58566	34.6711	2.28473	0.390285	-2.58124	0.107682	A_23_P86079
ANKRD65	Homo sapiens ankyrin repeat domain 65 (ANKRD65), transcript variant 1, mRNA [NM_001145210]	53.3062	28.5775	1160.79	1117.87	-1.06339	-1.66087	1.51609	1.51673	A_24_P311063
ANKRD66	Homo sapiens cDNA FLJ33075 fis, clone TRACH2000259. [AK057637]	1.89298	1.59957	3.128	3.93874	0.383966	0.442938	-0.756635	-0.36915	A_24_P889237
ANKRD7	Homo sapiens ankyrin repeat domain 7 (ANKRD7), mRNA [NM_019644]	64.1968	41.3583	40.4316	122.245	1.70895	1.37657	-0.823248	0.827968	A_23_P250231
ANKRD9	Homo sapiens ankyrin repeat domain 9 (ANKRD9), mRNA [NM_152326]	1051.12	922.142	3772.17	2374.28	-0.113081	0	-0.134788	-0.747704	A_23_P307525
ANKS1A	Homo sapiens ankyrin repeat and sterile alpha motif domain containing 1A (ANKS1A), mRNA [NM_015245]	1444.93	1469.17	2152.36	3132.43	0	0.325949	-1.29026	-0.693904	A_23_P156748
ANKS1B	Homo sapiens ankyrin repeat and sterile alpha motif domain containing 1B (ANKS1B), transcript variant 2, mRNA [NM_181670]	2.03614	1.79155	12.2134	4.17082	0.484646	0.601961	1.20402	-0.291044	A_23_P356717
ANKS1B	Homo sapiens ankyrin repeat and sterile alpha motif domain containing 1B (ANKS1B), transcript variant 1, mRNA [NM_152788]	2.08699	1.79269	3.60457	4.40095	0.313013	0.395665	-0.763758	-0.42078	A_23_P21842
ANKS3	Homo sapiens ankyrin repeat and sterile alpha motif domain containing 3 (ANKS3), transcript variant 1, mRNA [NM_133450]	1954.54	2213.24	3779.42	2883.5	0.594522	1.0758	-0.319317	-0.654673	A_32_P16975
ANKS4B	Homo sapiens ankyrin repeat and sterile alpha motif domain containing 4B (ANKS4B), mRNA [NM_145865]	2.02706	1.76915	3.46472	4.31273	0.433923	0.539537	-0.657903	-0.28705	A_23_P385766
ANKS6	Homo sapiens cDNA clone IMAGE:3620129. [BC012981]	31.1203	34.2839	240.599	134.559	-0.100639	0.340981	0.984886	0.201489	A_24_P358400
ANKS6	Homo sapiens ankyrin repeat and sterile alpha motif domain containing 6 (ANKS6), mRNA [NM_173551]	63.4035	62.0316	196.707	441.014	0.226215	0.496604	-0.00554752	1.21422	A_24_P380861
ANKS6	Homo sapiens ankyrin repeat and sterile alpha motif domain containing 6 (ANKS6), mRNA [NM_173551]	3138.62	2412.01	8418.54	11974.8	0.126134	0.0481834	-0.315605	0.247746	A_23_P362183
ANKUB1	Homo sapiens ankyrin repeat and ubiquitin domain containing 1 (ANKUB1), mRNA [NM_001144960]	2.20725	1.88212	3.26431	4.04721	0.397432	0.469485	-0.903218	-0.538078	A_24_P340954
ANKZF1	Homo sapiens ankyrin repeat and zinc finger domain containing 1 (ANKZF1), transcript variant 1, mRNA [NM_018089]	133.386	156.204	1581.46	1404.86	-1.05534	-0.525571	0.647061	0.53122	A_23_P119907
ANLN	Homo sapiens anillin, actin binding protein (ANLN), transcript variant 1, mRNA [NM_018685]	1530.89	1206.69	9145.68	940.529	0	-0.0413637	0.713545	-2.51301	A_23_P356684
ANO1	anoctamin 1, calcium activated chloride channel [Source:HGNC Symbol;Acc:21625] [ENST00000316296]	2.04203	2.25577	3.72305	4.62664	0.265389	0.710949	-0.733311	-0.36484	A_24_P110831
ANO1	Homo sapiens anoctamin 1, calcium activated chloride channel (ANO1), transcript variant 1, mRNA [NM_018043]	2.03439	90.0258	11.7169	3.99954	-1.37906	4.39055	-0.718311	-2.21401	A_24_P87036
ANO1	Homo sapiens anoctamin 1, calcium activated chloride channel (ANO1), transcript variant 1, mRNA [NM_018043]	1.86457	36.3416	13.6873	4.64313	-0.184908	4.40175	0.825839	-0.67884	A_23_P98304
ANO10	Homo sapiens anoctamin 10 (ANO10), transcript variant 1, mRNA [NM_018075]	1379.11	1324.51	1058.1	2168.29	2.60105	2.84472	0.353617	1.44369	A_23_P6688
ANO2	Homo sapiens anoctamin 2, calcium activated chloride channel (ANO2), transcript variant 2, mRNA [NM_001278597]	26.5475	5.32991	62.86	38.4884	0.79738	-1.21707	0.175767	-0.476958	A_32_P141238
ANO3	Homo sapiens anoctamin 3 (ANO3), mRNA [NM_031418]	656.794	310.602	3.45016	188.16	8.04884	7.27041	-1.38897	4.43517	A_23_P35725
ANO4	Homo sapiens anoctamin 4 (ANO4), transcript variant 3, mRNA [NM_178826]	1659.77	209.687	99.6962	524.56	6.6158	3.93307	0.693321	3.14381	A_23_P409093
ANO4	Homo sapiens anoctamin 4 (ANO4), transcript variant 3, mRNA [NM_178826]	417.912	86.4685	47.3779	180.402	6.30665	4.33565	1.30056	3.28448	A_23_P324554
ANO5	Homo sapiens anoctamin 5 (ANO5), transcript variant 1, mRNA [NM_213599]	2.01083	7.85344	3.37953	76.095	-1.02464	1.24284	-2.14078	2.40712	A_24_P100996
ANO6	Homo sapiens anoctamin 6 (ANO6), transcript variant 1, mRNA [NM_001025356]	1.92413	2.7474	78.2304	107.446	-3.28674	-2.47093	0.193537	0.706336	A_23_P53641
ANO6	Homo sapiens anoctamin 6 (ANO6), transcript variant 1, mRNA [NM_001025356]	950.824	772.758	8564.1	12504.9	-1.2426	-1.23982	0.0632725	0.664378	A_23_P389118
ANO7	Homo sapiens anoctamin 7 (ANO7), transcript variant NGEP-L, mRNA [NM_001001891]	27.8832	37.3415	176.032	197.084	-0.919768	-0.196439	-0.126579	0.0913849	A_23_P335495
ANO8	Homo sapiens anoctamin 8 (ANO8), mRNA [NM_020959]	8.45589	16.0131	359.795	301.982	-1.25001	-0.0268345	2.29589	2.09817	A_32_P73452
ANO9	Homo sapiens anoctamin 9 (ANO9), mRNA [NM_001012302]	9.11346	5.62366	11.2472	20.4665	-0.118167	-0.51271	-1.67985	-0.761158	A_24_P8109
ANP32A	Homo sapiens acidic (leucine-rich) nuclear phosphoprotein 32 family, member A (ANP32A), mRNA [NM_006305]	772.82	656.854	5076.29	1606.55	0.00271416	0.0701008	0.853106	-0.751707	A_23_P3242
ANP32A	Homo sapiens acidic (leucine-rich) nuclear phosphoprotein 32 family, member A (ANP32A), mRNA [NM_006305]	686.256	574.22	7587.2	2814.25	-0.58709	-0.542289	1.01448	-0.361345	A_32_P186027
ANP32A	Homo sapiens acidic (leucine-rich) nuclear phosphoprotein 32 family, member A (ANP32A), mRNA [NM_006305]	35.6762	11.1455	2294.67	998.366	-2.61853	-3.99508	1.52347	0.377821	A_32_P133670
ANP32A-IT1	Homo sapiens ANP32A intronic transcript 1 (non-protein coding) (ANP32A-IT1), long non-coding RNA [NR_026808]	90.0966	62.3846	10771.1	6894.16	-4.02182	-4.25016	1.01449	0.425751	A_23_P14649
ANP32A-IT1	Homo sapiens ANP32A intronic transcript 1 (non-protein coding) (ANP32A-IT1), long non-coding RNA [NR_026808]	2.05	1.81771	12.4111	5.01733	0.199614	0.328063	0.932375	-0.319277	A_24_P30844
ANP32A-IT1	Homo sapiens ANP32A intronic transcript 1 (non-protein coding) (ANP32A-IT1), long non-coding RNA [NR_026808]	4.27855	4.5709	322.293	59.3145	-2.81357	-2.41627	1.55636	-0.830566	A_24_P378302
ANP32B	Homo sapiens acidic (leucine-rich) nuclear phosphoprotein 32 family, member B (ANP32B), mRNA [NM_006401]	2122.59	1489.78	11053.3	5375.97	-0.0754213	-0.284195	0.439989	-0.544906	A_23_P20615
ANP32C	Homo sapiens acidic (leucine-rich) nuclear phosphoprotein 32 family, member C (ANP32C), mRNA [NM_012403]	2.55257	1.94591	879.252	449.262	-3.67134	-3.76091	2.89166	1.97793	A_23_P92520
ANP32D	Homo sapiens acidic (leucine-rich) nuclear phosphoprotein 32 family, member D (ANP32D), mRNA [NM_012404]	77.8522	29.8632	1553.47	638.531	-1.78618	-2.86661	0.667253	-0.560424	A_23_P87580
ANP32E	Homo sapiens acidic (leucine-rich) nuclear phosphoprotein 32 family, member E (ANP32E), transcript variant 1, mRNA [NM_030920]	152.108	101.237	1684.57	462.206	-0.860828	-1.14624	0.7432	-1.06758	A_23_P160934
ANP32E	Homo sapiens acidic (leucine-rich) nuclear phosphoprotein 32 family, member E (ANP32E), transcript variant 1, mRNA [NM_030920]	471.938	414.336	4369.59	1288.54	-0.462287	-0.348135	0.883368	-0.823408	A_24_P225468
ANPEP	Homo sapiens alanyl (membrane) aminopeptidase (ANPEP), mRNA [NM_001150]	690.477	2904.1	171.997	16470.5	1.48495	3.85932	-2.38544	4.25091	A_23_P88626
ANTXR1	Homo sapiens anthrax toxin receptor 1 (ANTXR1), transcript variant 1, mRNA [NM_032208]	4574.46	4659.49	5807.23	5522.23	1.52093	1.84944	0	-0.0176105	A_24_P131522
ANTXR1	Homo sapiens anthrax toxin receptor 1 (ANTXR1), transcript variant 2, mRNA [NM_053034]	1384.52	1763.93	3670.39	1266.9	1.32398	1.97534	0.865354	-0.614287	A_23_P84576
ANTXR1	Homo sapiens anthrax toxin receptor 1 (ANTXR1), transcript variant 2, mRNA [NM_053034]	1367.39	1663.34	4633.11	1697.93	0.871198	1.45581	0.766582	-0.626635	A_24_P208595
ANTXR2	Homo sapiens anthrax toxin receptor 2 (ANTXR2), transcript variant 1, mRNA [NM_058172]	7826.42	8992.18	1080	46715.4	0.714344	1.21661	-4.00815	1.48163	A_23_P170733
ANTXR2	Homo sapiens anthrax toxin receptor 2 (ANTXR2), transcript variant 1, mRNA [NM_058172]	26.9695	46.8296	15.875	389.257	0.591491	1.68953	-2.03826	2.63263	A_24_P345846
ANTXR2	Homo sapiens anthrax toxin receptor 2 (ANTXR2), transcript variant 1, mRNA [NM_058172]	51.6778	64.2911	55.0509	1408.91	0	0.61702	-1.77396	2.9587	A_24_P377144
ANXA1	Homo sapiens annexin A1 (ANXA1), mRNA [NM_000700]	24494.7	21631.3	69096.5	214703	-0.599157	-0.47656	-0.968191	0.722458	A_23_P94501
ANXA10	Homo sapiens annexin A10 (ANXA10), mRNA [NM_007193]	15.378	103.158	63.3633	24133.2	-2.36543	0.682425	-2.18783	6.44031	A_23_P58328
ANXA11	Homo sapiens annexin A11 (ANXA11), transcript variant c, mRNA [NM_145869]	13801.8	11059.6	29062	37144.3	0.150419	0.132816	-0.640476	-0.231481	A_23_P35399
ANXA11	annexin A11 [Source:HGNC Symbol;Acc:535] [ENST00000438331]	27.3424	35.7121	178.881	153.547	-1.25466	-0.567443	-0.410053	-0.575381	A_32_P150632
ANXA11	Homo sapiens annexin A11 (ANXA11), transcript variant c, mRNA [NM_145869]	4123.03	3134.93	6370.71	5556.02	1.14947	1.05615	-0.0879564	-0.230368	A_24_P107142
ANXA13	Homo sapiens annexin A13 (ANXA13), transcript variant 2, mRNA [NM_001003954]	2.05578	1.82599	3.39012	4.10328	0.280948	0.411888	-0.862579	-0.532145	A_23_P60006
ANXA13	Homo sapiens annexin A13 (ANXA13), transcript variant 2, mRNA [NM_001003954]	2.41472	2.58554	5.68993	14.6682	-0.865215	-0.464661	-1.49384	-0.072639	A_23_P60009
ANXA2	Homo sapiens annexin A2 (ANXA2), transcript variant 2, mRNA [NM_001002857]	23.7325	11.0224	4031.12	9788.84	-2.25463	-3.05911	3.28836	4.62331	A_32_P148345
ANXA2	Homo sapiens annexin A2 (ANXA2), transcript variant 2, mRNA [NM_001002857]	35496.6	35332	158813	220895	-0.382208	-0.0869665	-0.0858078	0.445215	A_23_P146644
ANXA2	Homo sapiens annexin A2 (ANXA2), transcript variant 2, mRNA [NM_001002857]	115451	96392.5	277407	335169	0.422453	0.464108	-0.178007	0.149872	A_32_P94798
ANXA2P1	Homo sapiens annexin A2 pseudogene 1 (ANXA2P1), non-coding RNA [NR_001562]	10448.1	5464.52	65500.5	91413.1	-0.726271	-1.3594	0.0568132	0.592699	A_24_P204244
ANXA2P3	Homo sapiens annexin A2 pseudogene 3 (ANXA2P3), non-coding RNA [NR_001446]	151.342	53.2352	4457.92	6804.5	-0.776277	-1.98169	2.23903	2.90414	A_24_P323114
ANXA2R	Homo sapiens annexin A2 receptor (ANXA2R), mRNA [NM_001014279]	152.999	38.2111	863.78	699.659	0.0923648	-1.60714	0.724332	0.475311	A_23_P431591
ANXA3	Homo sapiens annexin A3 (ANXA3), mRNA [NM_005139]	128.505	125.376	29023.1	9561.89	-5.86463	-5.59824	0.0894318	-1.45741	A_23_P121716
ANXA4	Homo sapiens annexin A4 (ANXA4), mRNA [NM_001153]	6051.09	6322.45	7031.09	26481.6	0.179636	0.544871	-1.46899	0.499174	A_23_P16976
ANXA5	Homo sapiens annexin A5 (ANXA5), mRNA [NM_001154]	29331.2	24001.7	73318.3	134328	0.435497	0.448145	-0.107944	0.820564	A_23_P69720
ANXA6	Homo sapiens annexin A6 (ANXA6), transcript variant 1, mRNA [NM_001155]	3396.23	917.039	10244.6	12015.6	1.30355	-0.283385	1.03123	1.31626	A_23_P357104
ANXA7	Homo sapiens annexin A7 (ANXA7), transcript variant 2, mRNA [NM_004034]	2712.72	1573.67	4937.68	8532.08	0.691291	0.20763	-0.309792	0.534263	A_23_P86570
ANXA8	annexin A8 [Source:HGNC Symbol;Acc:546] [ENST00000602274]	428.573	236.236	3303.76	2403.3	0.514706	-0.0426598	1.59603	1.19192	A_24_P135628
ANXA8L1	Homo sapiens annexin A8-like 1 (ANXA8L1), transcript variant 2, mRNA [NM_001278924]	17.696	9.99251	138.753	3749.05	-5.96466	-6.48721	-4.85881	-0.0478878	A_23_P395054
ANXA8L1	Homo sapiens annexin A8-like 1 (ANXA8L1), transcript variant 1, mRNA [NM_001098845]	429.874	228.186	2947.43	79376.9	-6.12655	-6.73831	-5.21425	-0.408073	A_32_P105549
ANXA9	Homo sapiens annexin A9 (ANXA9), mRNA [NM_003568]	10.6611	8.15909	6.80139	29.5012	-0.0963087	-0.18024	-2.60994	-0.438081	A_23_P103617
AOAH	Homo sapiens acyloxyacyl hydrolase (neutrophil) (AOAH), transcript variant 1, mRNA [NM_001637]	1.95612	1.74054	3.0167	3.871	0.420252	0.55374	-0.819945	-0.405222	A_23_P145718
AOC1	Homo sapiens amine oxidase, copper containing 1 (AOC1), transcript variant 2, mRNA [NM_001091]	2.29301	2.02542	17.5091	9.39838	-0.271961	-0.149037	0.795648	-0.0469789	A_23_P59452
AOC2	Homo sapiens amine oxidase, copper containing 2 (retina-specific) (AOC2), transcript variant 1, mRNA [NM_001158]	6.453	3.79099	24.0267	19.3067	0.142601	-0.322845	0.17402	-0.086525	A_23_P4133
AOC3	Homo sapiens amine oxidase, copper containing 3 (AOC3), transcript variant 1, mRNA [NM_003734]	84.4569	22.3772	74.4122	50.2069	2.04785	0.433613	0	-0.512663	A_23_P426305
AOC4P	Homo sapiens amine oxidase, copper containing 4, pseudogene (AOC4P), non-coding RNA [NR_002773]	1.87566	10.1906	6.10066	5.76356	-0.468654	2.27506	-0.632264	-0.659279	A_24_P781615
AOX1	Homo sapiens aldehyde oxidase 1 (AOX1), mRNA [NM_001159]	4543.7	402.081	127.034	18397.7	1.86498	-1.33138	-5.16078	2.07238	A_23_P154037
AP1AR	Homo sapiens adaptor-related protein complex 1 associated regulatory protein (AP1AR), transcript variant 1, mRNA [NM_018569]	173.663	112.259	758.876	968.667	0.142471	-0.185048	0.404866	0.811994	A_23_P69791
AP1AR	Homo sapiens adaptor-related protein complex 1 associated regulatory protein (AP1AR), transcript variant 1, mRNA [NM_018569]	7.02307	2.53335	148.272	216.955	-2.09008	-3.25919	0.444741	1.04888	A_24_P363023
AP1B1	Homo sapiens adaptor-related protein complex 1, beta 1 subunit (AP1B1), transcript variant 1, mRNA [NM_001127]	264.88	283.017	1526.87	918.154	0.0866756	0.484174	0.748662	0.0698881	A_23_P6398
AP1G1	Homo sapiens adaptor-related protein complex 1, gamma 1 subunit (AP1G1), transcript variant 1, mRNA [NM_001030007]	627.112	242.344	1485.69	1635.29	0.584442	-0.485279	-0.0363941	0.157005	A_23_P206788
AP1G1	Homo sapiens adaptor-related protein complex 1, gamma 1 subunit (AP1G1), transcript variant 1, mRNA [NM_001030007]	2052.19	1828.33	5146.86	3843.12	0.629106	0.764416	0.090457	-0.275968	A_24_P381962
AP1G1	Homo sapiens adaptor-related protein complex 1, gamma 1 subunit (AP1G1), transcript variant 1, mRNA [NM_001030007]	150.941	66.7783	1470.78	1068.54	-0.522315	-1.3969	0.897034	0.491089	A_23_P318208
AP1G2	Homo sapiens adaptor-related protein complex 1, gamma 2 subunit (AP1G2), transcript variant 1, mRNA [NM_003917]	92.6235	94.3788	1165.42	873.661	-1.58696	-1.25793	0.201193	-0.159525	A_23_P2967
AP1M1	Homo sapiens adaptor-related protein complex 1, mu 1 subunit (AP1M1), transcript variant 2, mRNA [NM_032493]	5200.97	4194.64	8834.17	8947.64	1.02746	1.01917	-0.0734034	0	A_23_P55802
AP1M2	Homo sapiens adaptor-related protein complex 1, mu 2 subunit (AP1M2), mRNA [NM_005498]	11.8647	9.1382	1213.88	304.394	-5.68015	-5.75489	-0.868519	-2.80914	A_23_P78543
AP1S1	Homo sapiens adaptor-related protein complex 1, sigma 1 subunit (AP1S1), mRNA [NM_001283]	197.705	39.6077	765.786	990.031	-0.0884147	-2.10596	0	0.425522	A_24_P63950
AP1S1	Homo sapiens adaptor-related protein complex 1, sigma 1 subunit (AP1S1), mRNA [NM_001283]	1691	387.577	2789.1	3712.43	0.716291	-1.10708	-0.426962	0.0405912	A_23_P157404
AP1S2	adaptor-related protein complex 1, sigma 2 subunit [Source:HGNC Symbol;Acc:560] [ENST00000380291]	2.24415	1.99019	17.0243	10.9544	0	0.128684	1.05818	0.477092	A_24_P937306
AP1S2	Homo sapiens adaptor-related protein complex 1, sigma 2 subunit (AP1S2), transcript variant 2, mRNA [NM_003916]	3065.16	2885.68	3031.3	6053.16	1.6086	1.8235	-0.272599	0.780142	A_23_P217384
AP1S2	Homo sapiens adaptor-related protein complex 1, sigma 2 subunit (AP1S2), transcript variant 2, mRNA [NM_003916]	893.708	747.161	1745.62	2649.22	0.898664	0.942226	-0.000648499	0.656169	A_24_P190804
AP1S3	Homo sapiens adaptor-related protein complex 1, sigma 3 subunit (AP1S3), transcript variant 2, long non-coding RNA [NR_110905]	49.4367	30.648	622.191	561.718	-1.78853	-2.17637	0	-0.0925217	A_23_P385295
AP1S3	Homo sapiens adaptor-related protein complex 1, sigma 3 subunit (AP1S3), transcript variant 1, mRNA [NM_001039569]	87.2613	51.9847	238.084	427.919	-0.132513	-0.577823	-0.549636	0.351225	A_24_P105747
AP2A1	Homo sapiens adaptor-related protein complex 2, alpha 1 subunit (AP2A1), transcript variant 1, mRNA [NM_014203]	539.299	324.044	862.979	1283.57	1.15227	0.719321	-0.034668	0.593082	A_23_P4885
AP2A2	Homo sapiens adaptor-related protein complex 2, alpha 2 subunit (AP2A2), transcript variant 2, mRNA [NM_012305]	906.636	814.257	2219.59	1735.59	0.873359	1.02027	0.299878	0	A_24_P339974
AP2A2	Homo sapiens adaptor-related protein complex 2, alpha 2 subunit (AP2A2), transcript variant 2, mRNA [NM_012305]	1728.24	1272.25	6220.45	9279.3	-0.247018	-0.386991	-0.264479	0.36751	A_24_P932418
AP2A2	Homo sapiens adaptor-related protein complex 2, alpha 2 subunit (AP2A2), transcript variant 2, mRNA [NM_012305]	1931.56	1530.7	6876.09	5387.56	0.259613	0.225978	0.226254	-0.0707121	A_23_P21853
AP2B1	Homo sapiens adaptor-related protein complex 2, beta 1 subunit (AP2B1), transcript variant 1, mRNA [NM_001030006]	1005.35	836.477	1952.86	3176.9	-0.106207	-0.0695667	-1.0135	-0.25648	A_24_P253827
AP2B1	Homo sapiens adaptor-related protein complex 2, beta 1 subunit (AP2B1), transcript variant 1, mRNA [NM_001030006]	1755.85	906.591	1804.8	4943.27	0.388638	-0.263058	-1.43687	0.0717506	A_23_P55149
AP2M1	Homo sapiens adaptor-related protein complex 2, mu 1 subunit (AP2M1), transcript variant 1, mRNA [NM_004068]	11174.5	9718.69	31485.7	30304.1	0.484371	0.584946	0.113683	0.11349	A_23_P155624
AP2S1	Homo sapiens adaptor-related protein complex 2, sigma 1 subunit (AP2S1), transcript variant AP17, mRNA [NM_004069]	8376.53	4453.65	11381.1	10473.8	1.2332	0.623787	-0.189753	-0.254616	A_24_P113295
AP3B1	Homo sapiens adaptor-related protein complex 3, beta 1 subunit (AP3B1), transcript variant 1, mRNA [NM_003664]	7335.61	6586.55	5335.54	10597.6	0.995336	1.14189	-1.32912	-0.284104	A_23_P136635
AP3B1	adaptor-related protein complex 3, beta 1 subunit [Source:HGNC Symbol;Acc:566] [ENST00000255194]	92.315	64.7278	78.6928	160.045	0.652844	0.442613	-1.44267	-0.3635	A_32_P47510
AP3B2	Homo sapiens adaptor-related protein complex 3, beta 2 subunit (AP3B2), transcript variant 2, mRNA [NM_004644]	3.23525	2.71246	39.5584	55.73	-0.88592	-0.83825	0.860935	1.4104	A_23_P77304
AP3D1	Homo sapiens adaptor-related protein complex 3, delta 1 subunit (AP3D1), transcript variant 2, mRNA [NM_003938]	15837.6	9050.82	43399.6	40779.4	0.211222	-0.294068	-0.19963	-0.23448	A_23_P108135
AP3D1	Homo sapiens adaptor-related protein complex 3, delta 1 subunit (AP3D1), transcript variant 2, mRNA [NM_003938]	1718.46	2238.4	7773.8	7966.77	-0.109262	0.574034	0.203063	0.293428	A_23_P119526
AP3M1	Homo sapiens adaptor-related protein complex 3, mu 1 subunit (AP3M1), transcript variant 1, mRNA [NM_207012]	294.668	212.55	1972.72	1283.57	-0.602825	-0.772164	0.275022	-0.290009	A_23_P158938
AP3M1	Homo sapiens adaptor-related protein complex 3, mu 1 subunit (AP3M1), transcript variant 1, mRNA [NM_207012]	1326.84	1006.49	3456.31	3243.78	0.155444	0.0587254	-0.328496	-0.365065	A_24_P167030
AP3M1	Homo sapiens adaptor-related protein complex 3, mu 1 subunit (AP3M1), transcript variant 1, mRNA [NM_207012]	47.5853	63.067	415.992	203.798	-1.25837	-0.550052	0.00442171	-0.970003	A_32_P195853
AP3M2	Homo sapiens adaptor-related protein complex 3, mu 2 subunit (AP3M2), transcript variant 2, mRNA [NM_006803]	176.763	69.6925	449.718	524.054	0.22812	-0.812675	-0.289855	-0.0141678	A_23_P170331
AP3M2	Homo sapiens adaptor-related protein complex 3, mu 2 subunit (AP3M2), transcript variant 2, mRNA [NM_006803]	294.899	164.356	1508.3	2184.86	-0.497829	-1.03928	-0.00837898	0.581234	A_24_P64039
AP3S1	Homo sapiens adaptor-related protein complex 3, sigma 1 subunit (AP3S1), mRNA [NM_001284]	15535.5	14174.4	22729.7	48447.6	0.312161	0.481829	-1.004	0.142833	A_23_P69958
AP3S2	Homo sapiens adaptor-related protein complex 3, sigma 2 subunit (AP3S2), transcript variant 1, mRNA [NM_005829]	3486.95	2634.55	9334.9	7661.23	0.102461	0	-0.342045	-0.572113	A_24_P287683
AP3S2	Homo sapiens adaptor-related protein complex 3, sigma 2 subunit (AP3S2), transcript variant 1, mRNA [NM_005829]	32.1094	34.4622	465.626	374.166	-1.18186	-0.777893	0.811067	0.550565	A_23_P100011
AP3S2	Homo sapiens adaptor-related protein complex 3, sigma 2 subunit (AP3S2), transcript variant 1, mRNA [NM_005829]	806.784	804.43	4449.87	3545.67	-0.594046	-0.296314	0.00428772	-0.268429	A_24_P287691
AP4B1	Homo sapiens adaptor-related protein complex 4, beta 1 subunit (AP4B1), transcript variant 1, mRNA [NM_006594]	440.232	240.853	1528.98	1452.52	0	-0.568166	-0.0689468	-0.0879688	A_23_P160729
AP4E1	Homo sapiens adaptor-related protein complex 4, epsilon 1 subunit (AP4E1), transcript variant 1, mRNA [NM_007347]	2344.43	1589.25	6853.65	4490.33	0.307632	0.0486879	-0.00990868	-0.56497	A_24_P929369
AP4E1	Homo sapiens adaptor-related protein complex 4, epsilon 1 subunit (AP4E1), transcript variant 1, mRNA [NM_007347]	17.4601	4.73232	48.9687	48.4612	0.377378	-1.20412	0	0.0399613	A_23_P413131
AP4M1	Homo sapiens adaptor-related protein complex 4, mu 1 subunit (AP4M1), mRNA [NM_004722]	479.917	739.145	1319.62	1522.07	-0.286375	0.638642	-0.692291	-0.431385	A_23_P157051
AP4S1	Homo sapiens adaptor-related protein complex 4, sigma 1 subunit (AP4S1), transcript variant 1, mRNA [NM_007077]	54.9325	40.6014	238.72	357.906	-0.254406	-0.388591	0	0.639255	A_24_P12281
AP4S1	Homo sapiens adaptor-related protein complex 4, sigma 1 subunit (AP4S1), transcript variant 5, mRNA [NM_001254728]	19.6533	11.5825	141.779	192.311	-0.347878	-0.808754	0.637746	1.13253	A_24_P401645
AP5B1	Homo sapiens adaptor-related protein complex 5, beta 1 subunit (AP5B1), mRNA [NM_138368]	34.4289	13.0923	196.783	69.5084	-0.582679	-1.67563	0.0670571	-1.3793	A_24_P9883
AP5B1	Homo sapiens adaptor-related protein complex 5, beta 1 subunit (AP5B1), mRNA [NM_138368]	18.2088	34.9924	149.087	89.989	-1.08152	0.162831	0.0867476	-0.586594	A_24_P383788
AP5B1	Homo sapiens adaptor-related protein complex 5, beta 1 subunit (AP5B1), mRNA [NM_138368]	34.3548	19.9018	149.735	129.965	-0.0282946	-0.513962	0.230351	0.0810609	A_23_P24424
AP5M1	Homo sapiens adaptor-related protein complex 5, mu 1 subunit (AP5M1), transcript variant 1, mRNA [NM_018229]	204.518	169.205	861.755	798.64	0.573992	0.602482	0.783866	0.729125	A_24_P33652
AP5M1	Homo sapiens adaptor-related protein complex 5, mu 1 subunit (AP5M1), transcript variant 1, mRNA [NM_018229]	8.30973	4.41485	161.375	191.24	-1.0972	-1.70769	1.3171	1.61705	A_24_P153754
AP5M1	Homo sapiens adaptor-related protein complex 5, mu 1 subunit (AP5M1), transcript variant 1, mRNA [NM_018229]	488.075	321.791	2967.77	3191.91	-0.160167	-0.459199	0.578862	0.738893	A_23_P37265
AP5S1	Homo sapiens adaptor-related protein complex 5, sigma 1 subunit (AP5S1), transcript variant 2, mRNA [NM_018347]	1542.57	1178.34	2833.09	2370.85	0.697036	0.610407	-0.291099	-0.493079	A_23_P57137
AP5Z1	Homo sapiens adaptor-related protein complex 5, zeta 1 subunit (AP5Z1), mRNA [NM_014855]	1024.47	1024.48	1429.25	4108.22	-0.0888386	0.213131	-1.47363	0.104619	A_23_P134637
AP5Z1	Homo sapiens adaptor-related protein complex 5, zeta 1 subunit (AP5Z1), mRNA [NM_014855]	1.99769	1.82909	3.79916	4.51692	0.330078	0.50482	-0.60775	-0.303099	A_32_P441305
APAF1	Homo sapiens apoptotic peptidase activating factor 1 (APAF1), transcript variant 3, mRNA [NM_181861]	90.8302	67.8142	329.325	195.744	0.617884	0.498245	0.610977	-0.084578	A_23_P36611
APBA1	ij42f09.y1 Human insulinoma Homo sapiens cDNA clone IMAGE:5633800 5', mRNA sequence [BM511013]	11.9463	7.68497	3.00199	20.8353	2.14371	1.80921	-1.71403	1.13599	A_32_P24857
APBA1	Homo sapiens amyloid beta (A4) precursor protein-binding, family A, member 1 (APBA1), mRNA [NM_001163]	7.77105	4.42897	19.3598	26.3852	1.2094	0.700205	0.661105	1.16276	A_23_P216806
APBA2	Homo sapiens amyloid beta (A4) precursor protein-binding, family A, member 2 (APBA2), transcript variant 1, mRNA [NM_005503]	132.738	354.912	1841.95	541.381	-1.45056	0.270259	0.478837	-1.23269	A_23_P158231
APBA2	Homo sapiens amyloid beta (A4) precursor protein-binding, family A, member 2 (APBA2), transcript variant 1, mRNA [NM_005503]	37.4756	168.01	197.827	311	-0.915082	1.55139	-0.380044	0.327623	A_23_P146849
APBA3	Homo sapiens amyloid beta (A4) precursor protein-binding, family A, member 3 (APBA3), mRNA [NM_004886]	94.069	50.522	641.915	657.366	0.743291	0.148431	1.64871	1.73801	A_23_P67555
APBB1	Homo sapiens amyloid beta (A4) precursor protein-binding, family B, member 1 (Fe65) (APBB1), transcript variant 1, mRNA [NM_001164]	1372.41	1370.81	1963.38	1894.57	2.119	2.41926	0.770453	0.773972	A_23_P1998
APBB1	Homo sapiens amyloid beta (A4) precursor protein-binding, family B, member 1 (Fe65) (APBB1), transcript variant 1, mRNA [NM_001164]	1577.02	1288.73	1989.17	2073.32	1.97749	1.98818	0.447277	0.562042	A_24_P372613
APBB1IP	Homo sapiens amyloid beta (A4) precursor protein-binding, family B, member 1 interacting protein (APBB1IP), mRNA [NM_019043]	86.1326	133.635	33.3007	2238.07	-1.39468	-0.459075	-4.63087	1.49468	A_23_P401700
APBB1IP	Homo sapiens amyloid beta (A4) precursor protein-binding, family B, member 1 interacting protein (APBB1IP), mRNA [NM_019043]	3.91532	1.86443	39.0373	178.519	-1.47075	-2.2392	-0.0182753	2.22987	A_24_P232365
APBB1IP	Homo sapiens amyloid beta (A4) precursor protein-binding, family B, member 1 interacting protein (APBB1IP), mRNA [NM_019043]	16.8688	18.9165	16.8777	440.543	-1.08797	-0.620729	-2.95238	1.8087	A_23_P12549
APBB2	Homo sapiens amyloid beta (A4) precursor protein-binding, family B, member 2 (APBB2), transcript variant 1, mRNA [NM_004307]	79.6884	85.1431	465.422	689.486	-1.04524	-0.647769	-0.364314	0.257659	A_24_P234701
APBB2	Homo sapiens amyloid beta (A4) precursor protein-binding, family B, member 2 (APBB2), transcript variant 3, mRNA [NM_173075]	820.52	825.741	4636.84	5240.66	-0.915378	-0.60428	-0.282024	-0.0504255	A_23_P10701
APBB3	Homo sapiens amyloid beta (A4) precursor protein-binding, family B, member 3 (APBB3), transcript variant 4, mRNA [NM_006051]	583.684	622.819	1092.16	654.084	0.891962	1.28753	-0.0692883	-0.753937	A_23_P110445
APC	Homo sapiens adenomatous polyposis coli (APC), transcript variant 3, mRNA [NM_000038]	83.1285	56.8878	116.983	201.208	1.31836	1.07308	-0.0539398	0.783447	A_23_P70213
APC	Homo sapiens adenomatous polyposis coli (APC), transcript variant 3, mRNA [NM_000038]	6.85901	3.54347	46.9833	10.8742	0.143923	-0.506966	1.05482	-1.00142	A_24_P918740
APC2	Homo sapiens adenomatosis polyposis coli 2 (APC2), mRNA [NM_005883]	9.75656	2.37135	227.193	226.23	-1.15242	-2.89114	1.5238	1.57266	A_24_P254133
APC2	Homo sapiens adenomatosis polyposis coli 2 (APC2), mRNA [NM_005883]	3.73539	3.24844	190.835	7.14208	-0.760057	-0.659623	3.04969	-1.63516	A_24_P76844
APC2	Homo sapiens adenomatosis polyposis coli 2 (APC2), mRNA [NM_005883]	174.492	105.216	6924.14	271.849	-0.90668	-1.33453	2.53855	-2.07722	A_23_P101905
APC2	Homo sapiens adenomatosis polyposis coli 2 (APC2), mRNA [NM_005883]	84.96	52.5125	2915.42	136.53	-0.850505	-1.24268	2.38509	-1.97633	A_23_P101908
APCDD1	Homo sapiens adenomatosis polyposis coli down-regulated 1 (APCDD1), mRNA [NM_153000]	295.739	137.951	411.859	22.2299	6.19973	5.40151	4.81238	0.655798	A_23_P337262
APCDD1L	Homo sapiens adenomatosis polyposis coli down-regulated 1-like (APCDD1L), mRNA [NM_153360]	221.463	226.355	138.172	3429.84	1.41481	1.74827	-1.13097	3.55762	A_32_P300427
APCS	Homo sapiens amyloid P component, serum (APCS), mRNA [NM_001639]	2.02068	6.33524	16.1154	12.2788	-0.759085	1.19142	0.371267	0.0339813	A_23_P96827
APEH	acylaminoacyl-peptide hydrolase [Source:HGNC Symbol;Acc:586] [ENST00000296456]	49.2467	37.5476	260.564	120.886	-0.0900269	-0.179389	0.448332	-0.604667	A_24_P200250
APEH	Homo sapiens acylaminoacyl-peptide hydrolase (APEH), mRNA [NM_001640]	2732.99	3058.76	10171.8	6928.36	0.195074	0.659486	0.225923	-0.273081	A_23_P41143
APEH	Homo sapiens acylaminoacyl-peptide hydrolase (APEH), mRNA [NM_001640]	4863.92	3230.71	15533.2	15250.9	0.0683756	-0.219944	-0.121639	-0.0931053	A_24_P208794
APEX1	Homo sapiens APEX nuclease (multifunctional DNA repair enzyme) 1 (APEX1), transcript variant 3, mRNA [NM_080649]	3956.38	3820.79	19955.4	13739.6	0.0141001	0.265736	0.48345	0	A_23_P151649
APEX1	Homo sapiens APEX nuclease (multifunctional DNA repair enzyme) 1 (APEX1), transcript variant 3, mRNA [NM_080649]	589.916	791.903	5861.4	3483.41	-0.436331	0.290428	1.01116	0.3154	A_23_P151653
APEX2	Homo sapiens APEX nuclease (apurinic/apyrimidinic endonuclease) 2 (APEX2), transcript variant 1, mRNA [NM_014481]	1189.01	966.738	4743.93	2284.96	-0.42777	-0.424386	-0.296624	-1.29555	A_23_P256682
APH1A	Homo sapiens APH1A gamma secretase subunit (APH1A), transcript variant 2, mRNA [NM_016022]	457.738	618.327	2030.33	1532.07	-1.19023	-0.454432	-0.906286	-1.25752	A_23_P12329
APH1A	Homo sapiens APH1A gamma secretase subunit (APH1A), transcript variant 1, mRNA [NM_001077628]	177.523	275.037	907.246	676.703	-0.933569	0	-0.445256	-0.813236	A_23_P930
APH1B	Homo sapiens APH1B gamma secretase subunit (APH1B), transcript variant 1, mRNA [NM_031301]	1522.72	901.794	1185.87	5033.2	0.882773	0.428935	-1.34311	0.797408	A_23_P205997
API5	Homo sapiens apoptosis inhibitor 5 (API5), transcript variant 2, mRNA [NM_006595]	326.058	205.931	1564.44	928.906	-0.152351	-0.513375	0.244915	-0.452136	A_23_P203255
API5	Homo sapiens apoptosis inhibitor 5 (API5), transcript variant 2, mRNA [NM_006595]	927.271	531.126	3649.94	3032.83	0.50199	0	0.613622	0.401408	A_24_P312692
APIP	Homo sapiens APAF1 interacting protein (APIP), mRNA [NM_015957]	581.011	229.981	2205.06	1727.1	0.467088	-0.568017	0.526093	0.228613	A_23_P2066
APITD1	Homo sapiens apoptosis-inducing, TAF9-like domain 1 (APITD1), transcript variant B, long non-coding RNA [NR_036462]	369.359	283.088	1958.36	1698.7	-0.264024	-0.345851	0.277352	0.127123	A_23_P138023
APLF	Homo sapiens aprataxin and PNKP like factor (APLF), mRNA [NM_173545]	218.054	147.591	148.723	325.859	1.91376	1.65263	-0.503468	0.68314	A_32_P16339
APLF	Homo sapiens aprataxin and PNKP like factor (APLF), mRNA [NM_173545]	6.4383	3.49068	3.24731	3.83809	1.96697	1.38575	-0.885637	-0.589507	A_23_P334246
APLF	aprataxin and PNKP like factor [Source:HGNC Symbol;Acc:28724] [ENST00000471727]	2.69937	1.81528	3.63684	17.9757	0.531734	0.261253	-0.903378	1.45691	A_32_P880454
APLN	Homo sapiens apelin (APLN), mRNA [NM_017413]	100.059	52.2945	1362.2	2748.87	-2.60141	-3.23558	-0.699566	0.368322	A_24_P404822
APLN	Homo sapiens apelin (APLN), mRNA [NM_017413]	25.1988	17.997	200.227	229.201	-0.597645	-0.781298	0.527388	0.777353	A_23_P147755
APLN	Homo sapiens apelin (APLN), mRNA [NM_017413]	43.9688	19.9308	388.497	1493.43	-1.90241	-2.74194	-0.624237	1.37341	A_23_P113393
APLNR	Homo sapiens apelin receptor (APLNR), transcript variant 1, mRNA [NM_005161]	3.28624	1.80721	8.88074	12.9318	-0.102667	-0.663391	-0.533599	0.0635634	A_23_P318860
APLP1	Homo sapiens amyloid beta (A4) precursor-like protein 1 (APLP1), transcript variant 2, mRNA [NM_005166]	29.238	17.179	268.298	180.495	-0.280921	-0.746172	1.05182	0.534936	A_23_P27983
APLP2	Homo sapiens amyloid beta (A4) precursor-like protein 2 (APLP2), transcript variant 1, mRNA [NM_001642]	13133.9	14833.7	37278.3	44114.7	0.423753	0.901287	0.0636206	0.361535	A_23_P202939
APLP2	Homo sapiens amyloid beta (A4) precursor-like protein 2 (APLP2), transcript variant 1, mRNA [NM_001642]	551.218	477.482	4975.68	6920.6	-0.648019	-0.55325	0.661003	1.192	A_24_P300952
APMAP	Homo sapiens adipocyte plasma membrane associated protein (APMAP), mRNA [NM_020531]	16779.1	13167.2	78368.9	52909.6	-0.168908	-0.216681	0.189529	-0.322232	A_23_P109201
APMAP	Homo sapiens adipocyte plasma membrane associated protein (APMAP), mRNA [NM_020531]	764.903	617.441	8063.98	5133.07	-0.593833	-0.600861	0.939135	0.342454	A_24_P297078
APOA1	Homo sapiens apolipoprotein A-I (APOA1), mRNA [NM_000039]	2.05864	7.15391	8.21391	150.838	-0.456406	1.64258	-0.325202	3.92857	A_23_P203191
APOA1BP	Homo sapiens apolipoprotein A-I binding protein (APOA1BP), mRNA [NM_144772]	4444.52	2516.8	13527.7	12424.1	-0.224937	-0.743429	-0.484299	-0.552086	A_23_P126448
APOA2	Homo sapiens apolipoprotein A-II (APOA2), mRNA [NM_001643]	2.04609	1.79593	9.29429	17.2808	0.2538	0.367613	0.572102	1.52184	A_24_P302249
APOA4	Homo sapiens apolipoprotein A-IV (APOA4), mRNA [NM_000482]	1.99367	1.7347	37.3775	28.3523	-1.6572	-1.55599	0.7063	0.362584	A_24_P252934
APOA4	Homo sapiens apolipoprotein A-IV (APOA4), mRNA [NM_000482]	5.43145	4.46425	8.52952	4.54594	1.37797	1.39699	0.163915	-0.688979	A_23_P87036
APOA5	Homo sapiens apolipoprotein A-V (APOA5), transcript variant 1, mRNA [NM_052968]	3.19437	4.16197	6.37467	6.65121	0.106794	0.790478	-0.761561	-0.645305	A_23_P75630
APOB	Homo sapiens apolipoprotein B (APOB), mRNA [NM_000384]	2.42245	2.36758	4.03578	4.30229	0.131883	0.400777	-0.996916	-0.849667	A_23_P79591
APOBEC1	Homo sapiens apolipoprotein B mRNA editing enzyme, catalytic polypeptide 1 (APOBEC1), mRNA [NM_001644]	2.11218	1.79317	3.62743	4.45748	0.424556	0.490283	-0.660408	-0.308136	A_23_P14019
APOBEC2	Homo sapiens apolipoprotein B mRNA editing enzyme, catalytic polypeptide-like 2 (APOBEC2), mRNA [NM_006789]	2.03626	1.8046	7.74394	4.36221	0.212275	0.339977	0.274241	-0.498774	A_23_P70387
APOBEC3A	Homo sapiens apolipoprotein B mRNA editing enzyme, catalytic polypeptide-like 3A (APOBEC3A), transcript variant 1, mRNA [NM_145699]	9.8287	5.07983	10.7725	4.29972	2.37964	1.72937	0.646742	-0.623303	A_32_P9543
APOBEC3B	Homo sapiens apolipoprotein B mRNA editing enzyme, catalytic polypeptide-like 3B (APOBEC3B), transcript variant 1, mRNA [NM_004900]	956.331	839.748	2527.05	489.064	0.463305	0.577699	0	-2.31437	A_24_P66027
APOBEC3C	Homo sapiens apolipoprotein B mRNA editing enzyme, catalytic polypeptide-like 3C (APOBEC3C), mRNA [NM_014508]	1076.94	544.859	622.488	2118.46	2.05087	1.36982	-0.605137	1.21675	A_23_P120931
APOBEC3D	Homo sapiens apolipoprotein B mRNA editing enzyme, catalytic polypeptide-like 3D (APOBEC3D), mRNA [NM_152426]	12.1534	1.81667	14.1404	25.5946	0.221477	-2.21857	-1.42524	-0.51423	A_23_P132316
APOBEC3D	PREDICTED: Homo sapiens apolipoprotein B mRNA editing enzyme, catalytic polypeptide-like 3D (APOBEC3D), transcript variant X5, mRNA [XM_006724139]	917.956	663.208	2282.42	415.418	0.689451	0.522433	0.138342	-2.2646	A_23_P369966
APOBEC3F	Homo sapiens apolipoprotein B mRNA editing enzyme, catalytic polypeptide-like 3F (APOBEC3F), transcript variant 1, mRNA [NM_145298]	575.069	284.607	367.931	1481.77	1.93773	1.22491	-0.571749	1.49306	A_23_P357101
APOBEC3G	Homo sapiens apolipoprotein B mRNA editing enzyme, catalytic polypeptide-like 3G (APOBEC3G), mRNA [NM_021822]	323.495	142.755	202.945	627.127	0.162624	-0.715638	-2.37521	-0.69255	A_23_P143713
APOBEC3G	apolipoprotein B mRNA editing enzyme, catalytic polypeptide-like 3G [Source:HGNC Symbol;Acc:17357] [ENST00000481958]	20.2411	8.31522	22.4766	28.9624	-0.15666	-1.13818	-1.8707	-1.44996	A_24_P942933
APOBEC3H	Homo sapiens apolipoprotein B mRNA editing enzyme, catalytic polypeptide-like 3H (APOBEC3H), transcript variant 2, mRNA [NM_181773]	2.08953	1.86096	3.4602	9.03691	-0.41963	-0.28481	-1.55713	-0.117165	A_32_P347617
APOBR	Homo sapiens apolipoprotein B receptor (APOBR), mRNA [NM_018690]	7.9139	3.75799	5.00077	3.85021	0.493884	-0.278597	-2.03353	-2.35576	A_23_P54770
APOC1	Homo sapiens apolipoprotein C-I (APOC1), mRNA [NM_001645]	15.4102	5.20484	143.916	127.422	-1.05048	-2.31449	0.30761	0.18699	A_24_P109214
APOC1	Homo sapiens apolipoprotein C-I (APOC1), mRNA [NM_001645]	25.33	15.6678	227.028	212.904	-0.98535	-1.37644	0.313427	0.275752	A_23_P4649
APOC2	Homo sapiens apolipoprotein C-II (APOC2), mRNA [NM_000483]	2.54367	1.67597	11.2129	4.26398	0.343469	0.043499	0.618464	-0.721428	A_23_P208302
APOC3	Homo sapiens apolipoprotein C-III (APOC3), mRNA [NM_000040]	2.05807	1.76583	6.86679	4.21361	-0.0809994	0	-0.207833	-0.857419	A_23_P203183
APOC4	Homo sapiens apolipoprotein C-IV (APOC4), mRNA [NM_001646]	10.7899	3.99744	23.3066	15.5357	0.997053	-0.133535	0.242928	-0.287232	A_23_P27450
APOD	Homo sapiens apolipoprotein D (APOD), mRNA [NM_001647]	1.92348	1.70683	3.55911	117.503	0.084754	0.214306	-0.892622	4.2074	A_23_P136777
APOE	Homo sapiens apolipoprotein E (APOE), mRNA [NM_000041]	133.852	707.971	179.533	1914.18	-1.34099	1.36401	-2.78255	0.686839	A_23_P164650
APOF	Homo sapiens apolipoprotein F (APOF), mRNA [NM_001638]	2.06074	1.83416	3.48676	4.19186	0.178039	0.311939	-0.928418	-0.607722	A_23_P87491
APOF	Homo sapiens apolipoprotein F (APOF), mRNA [NM_001638]	1.94849	1.737	3.01357	3.86217	0.3924	0.528592	-0.84366	-0.430731	A_24_P193027
APOH	Homo sapiens apolipoprotein H (beta-2-glycoprotein I) (APOH), mRNA [NM_000042]	2.60204	2.25603	3.32683	4.18271	0.63912	0.735213	-0.871552	-0.486272	A_23_P38244
APOL1	Homo sapiens apolipoprotein L, 1 (APOL1), transcript variant 2, mRNA [NM_145343]	1822.1	718.973	2029.51	5017.49	0.751977	-0.287667	-0.957667	0.403158	A_24_P87931
APOL1	Homo sapiens apolipoprotein L, 1 (APOL1), transcript variant 2, mRNA [NM_145343]	86.909	24.0117	179.259	449.87	0.169263	-1.38456	-0.651449	0.731007	A_23_P17837
APOL2	Homo sapiens apolipoprotein L, 2 (APOL2), transcript variant beta, mRNA [NM_145637]	377.091	452.218	421.462	801.725	0.920604	1.48466	-0.784083	0.198611	A_23_P211488
APOL2	Homo sapiens apolipoprotein L, 2 (APOL2), transcript variant beta, mRNA [NM_145637]	7008.98	3207.57	4385.6	10624.5	1.14761	0.321836	-1.39399	-0.0624475	A_24_P48898
APOL3	Homo sapiens apolipoprotein L, 3 (APOL3), transcript variant beta/a, mRNA [NM_145641]	1353.69	347.751	456.408	1018.25	1.82039	0.161571	-1.61328	-0.400605	A_23_P29237
APOL3	Homo sapiens apolipoprotein L, 3 (APOL3), transcript variant beta/a, mRNA [NM_145641]	97.2214	34.2443	61.551	125.316	1.30797	0.104502	-1.2167	-0.135995	A_24_P416997
APOL4	Homo sapiens apolipoprotein L, 4 (APOL4), transcript variant a, mRNA [NM_030643]	19.2772	4.88445	133.477	277.916	0.449857	-1.22883	1.3763	2.48935	A_23_P380857
APOL4	apolipoprotein L, 4 [Source:HGNC Symbol;Acc:14867] [ENST00000328429]	9.33845	2.92359	3.36804	4.19609	2.33554	0.962039	-1.00092	-0.628787	A_24_P374163
APOL5	Homo sapiens apolipoprotein L, 5 (APOL5), mRNA [NM_030642]	2.22641	1.96511	6.03189	5.28795	0.229222	0.351054	-0.198066	-0.332977	A_23_P166438
APOL6	Homo sapiens apolipoprotein L, 6 (APOL6), mRNA [NM_030641]	41.5562	20.8054	42.4693	25.9715	1.02883	0.332672	-0.804989	-1.45949	A_23_P155049
APOL6	Homo sapiens apolipoprotein L, 6 (APOL6), mRNA [NM_030641]	169.31	62.187	592.765	336.724	-1.60958	-2.75262	-1.66697	-2.42787	A_24_P941167
APOL6	Homo sapiens apolipoprotein L, 6 (APOL6), mRNA [NM_030641]	165.697	123.93	155.603	205.485	1.15241	1.03533	-0.803444	-0.347295	A_24_P7594
APOL6	Homo sapiens apolipoprotein L, 6 (APOL6), mRNA [NM_030641]	10.626	7.5474	14.1359	9.3394	0.656423	0.464816	-0.796993	-1.33997	A_23_P155052
APOLD1	Homo sapiens apolipoprotein L domain containing 1 (APOLD1), transcript variant 2, mRNA [NM_030817]	548.54	384.479	1212.65	353.821	0.729852	0.519105	0.00916576	-1.71291	A_23_P48217
APOM	Homo sapiens apolipoprotein M (APOM), transcript variant 1, mRNA [NM_019101]	97.193	26.0522	100.675	138.131	0.853924	-0.743575	-0.960477	-0.449148	A_24_P89426
APOM	Homo sapiens apolipoprotein M (APOM), transcript variant 1, mRNA [NM_019101]	476.776	187.097	494.554	535.557	0.942249	-0.105325	-0.870111	-0.700208	A_23_P42265
APOO	Homo sapiens apolipoprotein O (APOO), transcript variant 1, mRNA [NM_024122]	2787.23	1480.41	9406.41	6477.35	0	-0.610891	-0.110367	-0.593616	A_23_P61127
APOOL	Homo sapiens apolipoprotein O-like (APOOL), mRNA [NM_198450]	210.99	83.841	326.318	438.933	-0.284991	-1.31449	-1.52107	-1.03835	A_23_P136986
APOPT1	Homo sapiens apoptogenic 1, mitochondrial (APOPT1), mRNA [NM_032374]	2773.27	1664.65	7670.86	10745.4	0.139865	-0.294556	-0.257514	0.28374	A_23_P162879
APOPT1	apoptogenic 1, mitochondrial [Source:HGNC Symbol;Acc:20492] [ENST00000247618]	7.3763	6.973	22.4345	37.5278	-0.365942	-0.145113	-0.626367	0.170862	A_24_P22174
APP	Homo sapiens amyloid beta (A4) precursor protein (APP), transcript variant 1, mRNA [NM_000484]	459.576	403.833	7908.37	5676.33	-1.68649	-1.57109	0.553334	0.129902	A_24_P314159
APPBP2	Homo sapiens amyloid beta precursor protein (cytoplasmic tail) binding protein 2 (APPBP2), transcript variant 1, mRNA [NM_006380]	58.9807	35.0401	639.651	312.903	-0.235488	-0.684777	1.3383	0.361726	A_23_P383053
APPBP2	Homo sapiens amyloid beta precursor protein (cytoplasmic tail) binding protein 2 (APPBP2), transcript variant 1, mRNA [NM_006380]	2467.09	2458.99	4251.5	2975.94	1.06435	1.36155	-0.0156679	-0.475305	A_23_P207280
APPL1	Homo sapiens adaptor protein, phosphotyrosine interaction, PH domain and leucine zipper containing 1 (APPL1), mRNA [NM_012096]	104.717	58.0419	376.314	195.835	0.77238	0.222997	0.752645	-0.134665	A_24_P302833
APPL1	Homo sapiens adaptor protein, phosphotyrosine interaction, PH domain and leucine zipper containing 1 (APPL1), mRNA [NM_012096]	1111.71	720.415	3957.83	2750.58	0.233288	-0.0906515	0.200034	-0.269951	A_23_P166663
APPL2	Homo sapiens adaptor protein, phosphotyrosine interaction, PH domain and leucine zipper containing 2 (APPL2), transcript variant 1, mRNA [NM_018171]	591.508	484.055	695.507	998.68	1.29576	1.30848	-0.335753	0.241195	A_23_P105747
APRT	Homo sapiens adenine phosphoribosyltransferase (APRT), transcript variant 1, mRNA [NM_000485]	20687.2	11930.1	37813	48643.1	0.333993	-0.158196	-0.661041	-0.242696	A_23_P117955
APTR	Homo sapiens Alu-mediated CDKN1A/p21 transcriptional regulator (non-protein coding) (APTR), long non-coding RNA [NR_038361]	447.371	328.444	2320.49	1419.52	-0.0352068	-0.179088	0.474499	-0.17953	A_32_P61605
APTX	Homo sapiens aprataxin (APTX), transcript variant 1, mRNA [NM_175073]	874.842	465.922	2922.99	4445.03	-0.341214	-0.948201	-0.466043	0.1937	A_23_P252775
AQP1	Homo sapiens aquaporin 1 (Colton blood group) (AQP1), transcript variant 1, mRNA [NM_198098]	29.6751	1498.29	23.5461	68.5386	-0.334707	5.62516	-2.53365	-0.937229	A_23_P19894
AQP1	Homo sapiens aquaporin 1 (Colton blood group) (AQP1), transcript variant 1, mRNA [NM_198098]	92.2324	3318.88	11.1913	235.476	-0.284504	5.18672	-5.19258	-0.742457	A_23_P372834
AQP10	Homo sapiens aquaporin 10 (AQP10), mRNA [NM_080429]	5.00672	24.2454	27.1315	25.4232	-0.506641	2.07108	0.0662127	0.0273814	A_23_P126613
AQP10	aquaporin 10 [Source:HGNC Symbol;Acc:16029] [ENST00000484864]	11.2307	1.79854	62.9179	62.8995	0.0601134	-2.28049	0.68096	0.735529	A_23_P149398
AQP11	Homo sapiens aquaporin 11 (AQP11), mRNA [NM_173039]	74.0361	31.5697	182.753	679.591	-0.601793	-1.52953	-1.16338	0.786387	A_23_P417974
AQP12A	Homo sapiens aquaporin 12A (AQP12A), mRNA [NM_198998]	1.88355	1.79902	4.05048	4.81134	-0.250541	-0.0148344	-1.01108	-0.707743	A_23_P142856
AQP12B	aquaporin 12B [Source:HGNC Symbol;Acc:6096] [ENST00000414322]	1.99072	2.24073	5.40401	9.03006	-0.281613	0.191008	-0.706051	0.089643	A_23_P142861
AQP2	Homo sapiens aquaporin 2 (collecting duct) (AQP2), mRNA [NM_000486]	2.05402	2.46647	3.72433	4.64042	-0.0709248	0.495017	-1.07757	-0.705309	A_23_P204721
AQP2	Homo sapiens aquaporin 2 (collecting duct) (AQP2), mRNA [NM_000486]	111.41	98.7784	1498.57	1818.17	-0.778268	-0.649938	1.10618	1.44008	A_24_P172685
AQP3	Homo sapiens aquaporin 3 (Gill blood group) (AQP3), mRNA [NM_004925]	1183.18	1436.77	199.266	216.162	4.61043	5.19254	0.175352	0.347761	A_23_P112481
AQP3	Homo sapiens aquaporin 3 (Gill blood group) (AQP3), mRNA [NM_004925]	278.054	374.848	77.3683	80.5776	4.19937	4.93226	0.488646	0.602274	A_23_P112482
AQP4	Homo sapiens aquaporin 4 (AQP4), transcript variant a, mRNA [NM_001650]	1.8691	3.85109	9.48857	4.05549	0.328126	1.673	0.806797	-0.364525	A_24_P202522
AQP4	Homo sapiens aquaporin 4 (AQP4), transcript variant a, mRNA [NM_001650]	2.03033	1.78089	3.07499	4.00215	0.433593	0.546424	-0.832718	-0.397531	A_23_P107565
AQP4-AS1	Homo sapiens AQP4 antisense RNA 1 (AQP4-AS1), long non-coding RNA [NR_026908]	1.8778	1.69148	3.0066	3.86306	0.482477	0.63367	-0.703608	-0.287005	A_23_P435649
AQP4-AS1	Homo sapiens AQP4 antisense RNA 1 (AQP4-AS1), long non-coding RNA [NR_026908]	1.93647	1.74526	3.35114	3.84921	0.282838	0.434798	-0.791116	-0.536214	A_24_P65537
AQP5	Homo sapiens aquaporin 5 (AQP5), mRNA [NM_001651]	10.9763	7.60415	125.883	133.025	-1.14731	-1.37489	0.507138	0.641748	A_23_P366812
AQP5	Homo sapiens aquaporin 5 (AQP5), mRNA [NM_001651]	2.30615	1.98254	18.5541	82.0151	-2.61959	-2.53578	-1.47658	0.722557	A_23_P117104
AQP6	Homo sapiens aquaporin 6, kidney specific (AQP6), mRNA [NM_001652]	5.43663	4.43607	3.07559	8.05212	0.752101	0.760616	-1.93492	-0.491429	A_23_P502060
AQP7	Homo sapiens aquaporin 7 (AQP7), mRNA [NM_001170]	2.06796	1.80504	11.2507	15.5581	-0.384679	-0.278904	0.193886	0.716518	A_23_P158041
AQP7P1	Homo sapiens aquaporin 7 pseudogene 1 (AQP7P1), non-coding RNA [NR_002817]	2.01729	3.03088	6.13263	7.80945	0	0.889268	-0.261087	0.142618	A_24_P281009
AQP8	Homo sapiens aquaporin 8 (AQP8), mRNA [NM_001169]	11.9606	11.1814	106.104	71.9503	-0.345391	-0.140635	0.938544	0.433132	A_23_P26522
AQP9	Homo sapiens aquaporin 9 (AQP9), mRNA [NM_020980]	2.12105	2.79389	3.09769	359.205	-0.603768	0.0956802	-1.92253	4.98993	A_23_P106362
AQPEP	Homo sapiens laeverin (AQPEP), mRNA [NM_173800]	13.6076	6.73565	38.5124	42.1662	0.0722427	-0.640337	-0.292026	-0.106272	A_23_P58557
AQR	Homo sapiens aquarius intron-binding spliceosomal factor (AQR), mRNA [NM_014691]	289.841	235.877	1972.76	943.595	-0.00472021	0	0.896985	-0.111999	A_24_P280378
AQR	aquarius intron-binding spliceosomal factor [Source:HGNC Symbol;Acc:29513] [ENST00000156471]	262.004	236.445	2068.74	1650.77	-0.488091	-0.334229	0.627823	0.357203	A_24_P316305
AR	Homo sapiens androgen receptor (AR), transcript variant 1, mRNA [NM_000044]	881.361	831.328	3.79884	1114.24	1.53953	1.75716	-8.18367	0.0676003	A_23_P113111
ARAF	Homo sapiens v-raf murine sarcoma 3611 viral oncogene homolog (ARAF), transcript variant 1, mRNA [NM_001654]	932.044	1098.68	2411.53	1817.55	0.633003	1.17225	0.139305	-0.21366	A_23_P73511
ARAP1	Homo sapiens ArfGAP with RhoGAP domain, ankyrin repeat and PH domain 1 (ARAP1), transcript variant 3, mRNA [NM_001040118]	629.817	853.355	3703.55	3134.66	-0.831148	-0.0909891	-0.140424	-0.326033	A_24_P398432
ARAP1	Homo sapiens ArfGAP with RhoGAP domain, ankyrin repeat and PH domain 1 (ARAP1), transcript variant 3, mRNA [NM_001040118]	1215.37	1061.21	3941.9	3767.55	-0.29086	-0.184589	-0.458539	-0.468814	A_23_P105184
ARAP2	Homo sapiens ArfGAP with RhoGAP domain, ankyrin repeat and PH domain 2 (ARAP2), mRNA [NM_015230]	150.744	10.5391	539.947	584.748	-0.296386	-3.83272	-0.320849	-0.150863	A_32_P83784
ARAP3	Homo sapiens ArfGAP with RhoGAP domain, ankyrin repeat and PH domain 3 (ARAP3), mRNA [NM_022481]	1035.67	403.306	1340.8	2418.86	0.437156	-0.621513	-1.05549	-0.149268	A_23_P167389
ARC	Homo sapiens activity-regulated cytoskeleton-associated protein (ARC), mRNA [NM_015193]	2.45865	21.4989	67.4585	50.6938	-3.1927	0.237575	-0.279814	-0.637012	A_23_P365738
ARCN1	Homo sapiens archain 1 (ARCN1), transcript variant 1, mRNA [NM_001655]	111.288	95.6795	313.642	275.329	0.304388	0.388316	-0.0659728	-0.198943	A_23_P203103
ARCN1	Homo sapiens archain 1 (ARCN1), transcript variant 1, mRNA [NM_001655]	3517.78	3467.59	6714.98	9714.53	0.72081	1.00203	-0.211647	0.376104	A_24_P201531
AREG	Homo sapiens amphiregulin (AREG), mRNA [NM_001657]	332.058	10603.4	127.897	4716.55	2.46664	7.76554	-0.774988	4.48468	A_23_P259071
AREL1	apoptosis resistant E3 ubiquitin protein ligase 1 [Source:HGNC Symbol;Acc:20363] [ENST00000554070]	1.86101	1.68317	17.747	10.2097	-1.03604	-0.878997	0.352197	-0.390449	A_24_P282288
AREL1	Homo sapiens apoptosis resistant E3 ubiquitin protein ligase 1 (AREL1), mRNA [NM_001039479]	986.124	728.874	2628.94	3358.21	0.134152	0	-0.316383	0.0918159	A_23_P369987
ARF1	Homo sapiens ADP-ribosylation factor 1 (ARF1), transcript variant 1, mRNA [NM_001024227]	2061.39	1900.64	43564.8	57616	-1.89051	-1.70569	0.645784	1.10408	A_24_P190894
ARF1	Homo sapiens cDNA FLJ13741 fis, clone PLACE3000208. [AK023803]	170.329	161.528	1923.24	1180.1	-1.63196	-1.40656	0	-0.649638	A_24_P566891
ARF1	Homo sapiens ADP-ribosylation factor 1 (ARF1), transcript variant 1, mRNA [NM_001024227]	2159.23	2473.53	7791.72	9882.6	-0.227247	0.270752	-0.241002	0.156938	A_24_P259490
ARF1	Homo sapiens ADP-ribosylation factor 1 (ARF1), transcript variant 1, mRNA [NM_001024227]	1254.19	1760.61	4111.75	5295.88	0.141319	0.93259	-0.0108585	0.409248	A_23_P201086
ARF3	Homo sapiens ADP-ribosylation factor 3 (ARF3), mRNA [NM_001659]	597.035	241.974	1322.44	1070.38	0.746357	-0.254663	0.028491	-0.221599	A_23_P36521
ARF3	Homo sapiens ADP-ribosylation factor 3 (ARF3), mRNA [NM_001659]	9287.73	4738.41	14960.9	17015	0.541122	-0.127853	-0.636251	-0.395658	A_24_P256307
ARF3	Homo sapiens ADP-ribosylation factor 3 (ARF3), mRNA [NM_001659]	470.178	475.88	1235.8	1187.64	0	0.319338	-0.471014	-0.473364	A_24_P187750
ARF4	Homo sapiens ADP-ribosylation factor 4 (ARF4), mRNA [NM_001660]	20730.1	16780.5	36325.2	80644.2	0.971531	0.968533	-0.0844049	1.12119	A_23_P431789
ARF5	Homo sapiens ADP-ribosylation factor 5 (ARF5), mRNA [NM_001662]	2012.85	1728.16	6444.49	5399.08	0.0134115	0.0953503	-0.172941	-0.373304	A_24_P394702
ARF5	Homo sapiens ADP-ribosylation factor 5 (ARF5), mRNA [NM_001662]	1696.22	1540.84	4175.3	3491.85	0.191208	0.354554	-0.374411	-0.577306	A_23_P254601
ARF6	Homo sapiens ADP-ribosylation factor 6 (ARF6), mRNA [NM_001663]	780.599	1337.01	2684.71	2098.05	0.383788	1.46209	0.300725	0	A_23_P48691
ARF6	Homo sapiens ADP-ribosylation factor 6 (ARF6), mRNA [NM_001663]	459.857	437.861	2146.06	3739.3	0.11108	0.342314	0.468335	1.32441	A_24_P472455
ARFGAP1	Homo sapiens ADP-ribosylation factor GTPase activating protein 1 (ARFGAP1), transcript variant 2, mRNA [NM_175609]	74.208	92.8235	192.212	153.261	0.492125	1.11699	0	-0.271714	A_24_P271296
ARFGAP1	Homo sapiens ADP-ribosylation factor GTPase activating protein 1 (ARFGAP1), transcript variant 2, mRNA [NM_175609]	4570.46	4127.62	15953.9	13188.8	-0.0218411	0.133077	-0.083519	-0.30313	A_23_P210379
ARFGAP2	Homo sapiens ADP-ribosylation factor GTPase activating protein 2 (ARFGAP2), transcript variant 1, mRNA [NM_032389]	638.774	646.507	1384.43	871.861	1.0857	1.40501	0.336438	-0.275693	A_23_P161552
ARFGAP3	Homo sapiens ADP-ribosylation factor GTPase activating protein 3 (ARFGAP3), transcript variant 1, mRNA [NM_014570]	4569.23	3146.14	5385.87	17092.7	1.02624	0.789821	-0.601707	1.11941	A_23_P68970
ARFGEF1	Homo sapiens ADP-ribosylation factor guanine nucleotide-exchange factor 1 (brefeldin A-inhibited) (ARFGEF1), mRNA [NM_006421]	1422.52	1366.54	3050.67	3780.22	-0.0638371	0.180191	-0.828335	-0.464	A_23_P82941
ARFGEF2	Homo sapiens ADP-ribosylation factor guanine nucleotide-exchange factor 2 (brefeldin A-inhibited) (ARFGEF2), mRNA [NM_006420]	153.298	101.792	870.928	574.547	-0.528993	-0.817755	0.112049	-0.433088	A_23_P5995
ARFIP1	Homo sapiens ADP-ribosylation factor interacting protein 1 (ARFIP1), transcript variant 1, mRNA [NM_001025595]	29.7899	21.6954	188.601	249.922	0.627195	0.471708	1.42446	1.88559	A_23_P95050
ARFIP1	Homo sapiens ADP-ribosylation factor interacting protein 1 (ARFIP1), transcript variant 1, mRNA [NM_001025595]	5533.31	5680.56	7470.32	10409.6	1.37478	1.71461	-0.057375	0.476292	A_24_P166094
ARFIP2	Homo sapiens ADP-ribosylation factor interacting protein 2 (ARFIP2), transcript variant 2, mRNA [NM_012402]	1859.38	1740.72	4792.22	4888.48	0.415621	0.62243	-0.0836821	0	A_23_P139228
ARFRP1	Homo sapiens ADP-ribosylation factor related protein 1 (ARFRP1), transcript variant 1, mRNA [NM_003224]	483.44	390.271	2394.43	974	0.155185	0.148272	0.598284	-0.644418	A_24_P159948
ARG1	Homo sapiens arginase 1 (ARG1), transcript variant 2, mRNA [NM_000045]	5.17084	1.89502	3.54491	4.36437	1.2466	0.100366	-1.16322	-0.808211	A_23_P111321
ARG2	Homo sapiens arginase 2 (ARG2), mRNA [NM_001172]	73.9651	59.3216	564.532	422.047	-1.065	-1.08134	0.00196075	-0.362699	A_23_P128728
ARGLU1	Homo sapiens arginine and glutamate rich 1 (ARGLU1), mRNA [NM_018011]	55.7775	49.7534	2199.02	1643.25	-2.59877	-2.46171	0.837082	0.471766	A_23_P162782
ARHGAP1	Homo sapiens Rho GTPase activating protein 1 (ARHGAP1), mRNA [NM_004308]	28439.9	23836.1	36691.8	60938.8	0.929316	0.976491	-0.568321	0.218573	A_23_P314070
ARHGAP1	Homo sapiens Rho GTPase activating protein 1 (ARHGAP1), mRNA [NM_004308]	245.312	325.383	219.677	380.4	1.87554	2.58501	-0.14887	0.698255	A_23_P44057
ARHGAP10	Homo sapiens Rho GTPase activating protein 10 (ARHGAP10), mRNA [NM_024605]	871.036	960.658	3870.19	2316.88	0.398808	0.842045	0.685232	0	A_23_P21548
ARHGAP11A	Homo sapiens Rho GTPase activating protein 11A (ARHGAP11A), transcript variant 1, mRNA [NM_014783]	45.3182	35.1916	519.388	77.6517	-1.04945	-1.11236	0.604025	-2.08271	A_24_P296254
ARHGAP11A	Homo sapiens Rho GTPase activating protein 11A (ARHGAP11A), transcript variant 1, mRNA [NM_014783]	430.678	431.324	5284.54	544.113	-0.556014	-0.251903	1.19591	-2.0289	A_23_P136805
ARHGAP11A	Homo sapiens Rho GTPase activating protein 11A (ARHGAP11A), transcript variant 2, mRNA [NM_199357]	10.9644	4.7946	352.775	29.8459	-1.86631	-2.75771	1.27636	-2.2318	A_32_P147090
ARHGAP12	Homo sapiens Rho GTPase activating protein 12 (ARHGAP12), transcript variant 1, mRNA [NM_018287]	3774.84	3344.18	3207.66	8670.1	0.827024	0.954207	-1.27305	0.216471	A_23_P149775
ARHGAP15	Homo sapiens Rho GTPase activating protein 15 (ARHGAP15), mRNA [NM_018460]	9.69992	2.72822	5.67574	14.3772	1.88056	0.352493	-0.757785	0.638113	A_23_P255166
ARHGAP15	Homo sapiens Rho GTPase activating protein 15 (ARHGAP15), mRNA [NM_018460]	1.84037	1.66019	3.12388	3.83117	0.293398	0.446694	-0.808434	-0.459	A_23_P84154
ARHGAP17	Homo sapiens Rho GTPase activating protein 17 (ARHGAP17), transcript variant 1, mRNA [NM_001006634]	6589.39	3222.68	6184.21	4427.14	1.3198	0.589865	-0.636932	-1.06416	A_24_P401739
ARHGAP17	Homo sapiens Rho GTPase activating protein 17 (ARHGAP17), transcript variant 1, mRNA [NM_001006634]	5066.59	2474.51	6953.34	5095.75	0.833902	0.101977	-0.574584	-0.968005	A_23_P15113
ARHGAP18	Rho GTPase activating protein 18 [Source:HGNC Symbol;Acc:21035] [ENST00000368149]	331.597	334.187	54.7244	332.1	0.810021	1.12319	-3.65433	-0.997977	A_32_P17163
ARHGAP18	Homo sapiens Rho GTPase activating protein 18 (ARHGAP18), mRNA [NM_033515]	808.702	762.074	290.433	2784.3	-0.334566	-0.118298	-3.67715	-0.36112	A_32_P162250
ARHGAP19	Homo sapiens Rho GTPase activating protein 19 (ARHGAP19), transcript variant 1, mRNA [NM_032900]	18.2417	7.58309	35.6331	13.5463	0.803434	-0.161004	-0.095768	-1.43609	A_23_P334845
ARHGAP19	Homo sapiens Rho GTPase activating protein 19 (ARHGAP19), transcript variant 1, mRNA [NM_032900]	197.767	166.958	1819.86	354.458	-0.105192	-0.0475621	1.23158	-1.07357	A_23_P1387
ARHGAP20	Homo sapiens Rho GTPase activating protein 20 (ARHGAP20), transcript variant 1, mRNA [NM_020809]	1376.12	400.318	420.328	2180.86	3.58708	2.10764	0.0108824	2.44118	A_23_P422933
ARHGAP20	Homo sapiens Rho GTPase activating protein 20 (ARHGAP20), transcript variant 1, mRNA [NM_020809]	3.8698	1.77287	3.37884	8.09963	1.2418	0.417577	-0.819108	0.49721	A_32_P429102
ARHGAP21	Homo sapiens Rho GTPase activating protein 21 (ARHGAP21), mRNA [NM_020824]	367.06	269.751	2926.42	2081.75	0.167642	0.0252008	1.29751	0.861166	A_23_P115608
ARHGAP22	Homo sapiens Rho GTPase activating protein 22 (ARHGAP22), transcript variant 3, mRNA [NM_021226]	4009.55	6697.35	4000.98	13906	1.71166	2.75376	-0.156605	1.69567	A_23_P75310
ARHGAP23	Homo sapiens Rho GTPase activating protein 23 (ARHGAP23), mRNA [NM_001199417]	3396	1841.08	17426.8	12854.6	-0.503807	-1.08515	-0.00958443	-0.393614	A_24_P920207
ARHGAP24	Homo sapiens Rho GTPase activating protein 24 (ARHGAP24), transcript variant 1, mRNA [NM_001025616]	37.6623	61.0163	64.4552	237.102	1.84134	2.83936	0.75134	2.68547	A_24_P380061
ARHGAP24	Rho GTPase activating protein 24 [Source:HGNC Symbol;Acc:25361] [ENST00000509709]	4.60087	7.4674	104.937	451.753	-2.79827	-1.79762	-0.151975	2.00903	A_32_P72067
ARHGAP24	Homo sapiens Rho GTPase activating protein 24 (ARHGAP24), transcript variant 1, mRNA [NM_001025616]	234.243	295.906	208.972	712.993	2.40159	3.04067	0.37171	2.19728	A_23_P110151
ARHGAP24	Homo sapiens Rho GTPase activating protein 24 (ARHGAP24), transcript variant 1, mRNA [NM_001025616]	25.0377	65.2327	216.274	740.472	0.340945	2.02438	1.58645	3.41703	A_24_P388659
ARHGAP25	Homo sapiens Rho GTPase activating protein 25 (ARHGAP25), transcript variant 1, mRNA [NM_001007231]	88.0567	105.197	258.342	385.243	0.601866	1.1604	0.289465	0.920943	A_23_P142974
ARHGAP25	Rho GTPase activating protein 25 [Source:HGNC Symbol;Acc:28951] [ENST00000497079]	2.22715	1.86778	3.46038	4.32474	0.284007	0.332077	-0.945439	-0.568764	A_24_P179516
ARHGAP26	Homo sapiens Rho GTPase activating protein 26 (ARHGAP26), transcript variant 1, mRNA [NM_015071]	35.6986	17.0224	340.262	173.936	-1.62255	-2.38904	-0.235023	-1.14812	A_24_P28165
ARHGAP26	Homo sapiens Rho GTPase activating protein 26 (ARHGAP26), transcript variant 1, mRNA [NM_015071]	5.12341	3.8391	24.4034	4.17432	-1.33551	-1.44991	-0.948786	-3.44127	A_23_P214066
ARHGAP27	Homo sapiens Rho GTPase activating protein 27 (ARHGAP27), transcript variant 1, mRNA [NM_199282]	24.9154	15.6594	103.271	233.517	-2.2918	-2.65986	-2.10566	-0.873569	A_23_P141335
ARHGAP27	Homo sapiens Rho GTPase activating protein 27 (ARHGAP27), transcript variant 3, mRNA [NM_174919]	722.993	282.617	319.263	429.151	1.6913	0.638117	-1.35311	-0.871381	A_23_P401626
ARHGAP27	Homo sapiens Rho GTPase activating protein 27 (ARHGAP27), transcript variant 1, mRNA [NM_199282]	8.76516	8.13711	25.6446	57.7238	-1.68362	-1.48893	-1.99999	-0.774491	A_23_P141342
ARHGAP28	Homo sapiens Rho GTPase activating protein 28 (ARHGAP28), mRNA [NM_001010000]	105.344	30.533	380.523	141.659	0.759697	-0.725028	0.747388	-0.62318	A_24_P579356
ARHGAP28	Homo sapiens Rho GTPase activating protein 28 (ARHGAP28), mRNA [NM_001010000]	10.2679	6.12669	306.799	44.4082	-0.830512	-1.27353	2.20539	-0.528018	A_23_P130359
ARHGAP29	Rho GTPase activating protein 29 [Source:HGNC Symbol;Acc:30207] [ENST00000370217]	4.55326	2.81145	23.5687	24.3377	-0.817469	-1.21111	-0.310745	-0.209432	A_24_P333571
ARHGAP29	Homo sapiens Rho GTPase activating protein 29 (ARHGAP29), mRNA [NM_004815]	290.314	66.7919	696.555	966.717	0.153468	-1.66445	-0.449084	0.078763	A_23_P149562
ARHGAP30	Homo sapiens Rho GTPase activating protein 30 (ARHGAP30), transcript variant 1, mRNA [NM_001025598]	2.01553	1.71626	8.36808	8.99538	-0.538969	-0.468912	-0.350406	-0.191129	A_23_P35045
ARHGAP30	Homo sapiens Rho GTPase activating protein 30 (ARHGAP30), transcript variant 2, mRNA [NM_181720]	6.67359	3.35268	8.43059	12.0822	1.28941	0.598206	-0.238597	0.335576	A_24_P911231
ARHGAP31	Homo sapiens Rho GTPase activating protein 31 (ARHGAP31), mRNA [NM_020754]	33.2046	43.9527	106.852	324.824	-0.114333	0.59218	-0.29335	1.36568	A_24_P349039
ARHGAP31	Rho GTPase activating protein 31 [Source:HGNC Symbol;Acc:29216] [ENST00000264245]	13.8963	10.2106	36.907	244.556	-0.290514	-0.433203	-0.746503	2.03669	A_32_P226620
ARHGAP32	Homo sapiens Rho GTPase activating protein 32 (ARHGAP32), transcript variant 2, mRNA [NM_014715]	100.774	75.7602	924.402	433.907	-0.414655	-0.524326	0.917559	-0.118586	A_23_P161686
ARHGAP32	Homo sapiens Rho GTPase activating protein 32 (ARHGAP32), transcript variant 2, mRNA [NM_014715]	4.11633	3.44078	39.6685	15.5596	-0.532685	-0.489362	0.8707	-0.424497	A_24_P42436
ARHGAP32	Homo sapiens Rho GTPase activating protein 32 (ARHGAP32), transcript variant 2, mRNA [NM_014715]	39.023	32.745	720.554	282.996	-1.51052	-1.46162	0.831018	-0.462316	A_24_P135344
ARHGAP33	Homo sapiens Rho GTPase activating protein 33 (ARHGAP33), transcript variant 1, mRNA [NM_052948]	74.6673	60.4149	277.696	43.7509	1.10967	1.10604	1.13945	-1.47168	A_23_P404730
ARHGAP33	Homo sapiens Rho GTPase activating protein 33 (ARHGAP33), transcript variant 1, mRNA [NM_052948]	35141.3	9159.11	111615	119559	0.707661	-0.93028	0.50977	0.663959	A_24_P10674
ARHGAP35	Homo sapiens Rho GTPase activating protein 35 (ARHGAP35), mRNA [NM_004491]	22.0635	11.092	103.275	68.7716	-0.253303	-0.943502	0.108276	-0.423338	A_23_P39137
ARHGAP35	Homo sapiens Rho GTPase activating protein 35 (ARHGAP35), mRNA [NM_004491]	26.4598	21.6744	77.4018	58.9047	0.31661	0.330745	0	-0.338994	A_24_P36299
ARHGAP35	Homo sapiens Rho GTPase activating protein 35 (ARHGAP35), mRNA [NM_004491]	972.31	983.893	3933.22	3095.22	0.24095	0.55998	0.391996	0.101317	A_24_P44845
ARHGAP36	Homo sapiens Rho GTPase activating protein 36 (ARHGAP36), transcript variant 1, mRNA [NM_144967]	2.20652	1.96779	3.59603	4.18882	0.368452	0.505205	-0.792093	-0.516964	A_23_P72968
ARHGAP39	Homo sapiens Rho GTPase activating protein 39 (ARHGAP39), mRNA [NM_025251]	20.3279	30.8411	459.871	270.074	-2.14725	-1.24391	0.487275	-0.225607	A_23_P424878
ARHGAP4	Homo sapiens Rho GTPase activating protein 4 (ARHGAP4), transcript variant 2, mRNA [NM_001666]	282.433	178.146	507.021	359.678	0.0399942	-0.32291	-0.981047	-1.4214	A_23_P159927
ARHGAP42	Rho GTPase activating protein 42 [Source:HGNC Symbol;Acc:26545] [ENST00000524892]	42.1178	47.2649	298.797	210.818	-0.425759	0.0425253	0.535728	0.0875506	A_23_P161706
ARHGAP44	Rho GTPase activating protein 44 [Source:HGNC Symbol;Acc:29096] [ENST00000584974]	3.42026	7.7166	38.5666	44.2465	-0.741575	0.734232	0.888424	1.14163	A_24_P942385
ARHGAP44	Homo sapiens Rho GTPase activating protein 44 (ARHGAP44), mRNA [NM_014859]	491.002	577.345	802.411	2280.48	1.50184	2.03749	0.345272	1.90719	A_23_P26854
ARHGAP5	Homo sapiens Rho GTPase activating protein 5 (ARHGAP5), transcript variant 1, mRNA [NM_001030055]	193.196	107.051	809.542	986.744	0.402606	-0.147213	0.604466	0.945027	A_23_P48535
ARHGAP5-AS1	Homo sapiens ARHGAP5 antisense RNA 1 (head to head) (ARHGAP5-AS1), long non-coding RNA [NR_027263]	92.5812	56.9066	717.813	793.718	-0.0843959	-0.484572	1.00524	1.20525	A_23_P25746
ARHGAP6	Homo sapiens Rho GTPase activating protein 6 (ARHGAP6), transcript variant 1, mRNA [NM_013427]	173.211	226.591	322.641	158.382	4.88431	5.57382	3.91653	2.94501	A_23_P217428
ARHGAP6	Homo sapiens Rho GTPase activating protein 6 (ARHGAP6), transcript variant 3, mRNA [NM_006125]	13.1089	13.9126	56.3728	16.3713	1.48957	1.87735	1.72884	0	A_24_P41864
ARHGAP9	Homo sapiens Rho GTPase activating protein 9 (ARHGAP9), transcript variant 1, mRNA [NM_032496]	19.9327	2.74914	19.1283	21.5341	1.04851	-1.50763	-0.876098	-0.650192	A_23_P64661
ARHGDIA	Homo sapiens Rho GDP dissociation inhibitor (GDI) alpha (ARHGDIA), transcript variant 2, mRNA [NM_004309]	195.975	182.384	580.706	498.376	0.276914	0.475173	-0.0211239	-0.186706	A_24_P133933
ARHGDIA	Homo sapiens Rho GDP dissociation inhibitor (GDI) alpha (ARHGDIA), transcript variant 2, mRNA [NM_004309]	99.424	69.3721	350.623	338.052	0.0446062	-0.172685	-0.00231743	0	A_24_P366994
ARHGDIA	Homo sapiens Rho GDP dissociation inhibitor (GDI) alpha (ARHGDIA), transcript variant 2, mRNA [NM_004309]	3087.93	2063.18	7174.49	6336.96	0.721399	0.441577	0.0724592	-0.0516367	A_23_P207766
ARHGDIA	Rho GDP dissociation inhibitor (GDI) alpha [Source:HGNC Symbol;Acc:678] [ENST00000584397]	216.524	176.244	441.542	405.749	0.461295	0.46629	-0.37586	-0.442832	A_24_P366989
ARHGDIB	Homo sapiens Rho GDP dissociation inhibitor (GDI) beta (ARHGDIB), mRNA [NM_001175]	695.882	1932.15	7978.66	1974.88	-0.769165	1.00607	0.884889	-1.0745	A_23_P151075
ARHGDIG	Homo sapiens Rho GDP dissociation inhibitor (GDI) gamma (ARHGDIG), mRNA [NM_001176]	8.84942	2.90636	380.007	80.7617	-0.0338035	-1.33823	3.52532	1.34603	A_24_P215882
ARHGEF1	Homo sapiens Rho guanine nucleotide exchange factor (GEF) 1 (ARHGEF1), transcript variant 1, mRNA [NM_199002]	261.145	312.747	368.148	371.213	1.03188	1.59398	-0.33786	-0.270906	A_24_P202581
ARHGEF1	Homo sapiens Rho guanine nucleotide exchange factor (GEF) 1 (ARHGEF1), transcript variant 1, mRNA [NM_199002]	75.4246	72.3502	390.386	437.115	-0.892063	-0.650155	-0.385447	-0.167342	A_23_P101321
ARHGEF10	Rho guanine nucleotide exchange factor (GEF) 10 [Source:HGNC Symbol;Acc:14103] [ENST00000523711]	2.02316	1.7245	82.7094	36.3619	-2.76628	-2.69477	0.721909	-0.408723	A_24_P188085
ARHGEF10	Rho guanine nucleotide exchange factor (GEF) 10 [Source:HGNC Symbol;Acc:14103] [ENST00000520972]	20.8918	18.9137	538.854	254.332	-2.37469	-2.21625	0.449025	-0.579168	A_24_P256674
ARHGEF10	Rho guanine nucleotide exchange factor (GEF) 10 [Source:HGNC Symbol;Acc:14103] [ENST00000522969]	2.01466	1.78099	99.6533	68.4462	-1.99209	-1.86801	1.77104	1.28408	A_23_P392024
ARHGEF10	Homo sapiens Rho guanine nucleotide exchange factor (GEF) 10 (ARHGEF10), mRNA [NM_014629]	7024.61	7491.63	23710.2	15985	-0.181247	0.213562	-0.291403	-0.8052	A_23_P216282
ARHGEF10	Homo sapiens Rho guanine nucleotide exchange factor (GEF) 10 (ARHGEF10), mRNA [NM_014629]	44.8035	74.348	1063.98	541.854	-1.62472	-0.592092	1.07981	0.161313	A_24_P283535
ARHGEF10	Rho guanine nucleotide exchange factor (GEF) 10 [Source:HGNC Symbol;Acc:14103] [ENST00000522969]	5.4778	3.82992	368.279	144.35	-3.12539	-3.33973	1.08049	-0.215743	A_23_P356216
ARHGEF10L	Homo sapiens Rho guanine nucleotide exchange factor (GEF) 10-like (ARHGEF10L), transcript variant 1, mRNA [NM_018125]	1101.48	1792.7	1920.76	2145.92	0.452261	1.4569	-0.610683	-0.395771	A_23_P386
ARHGEF10L	Homo sapiens Rho guanine nucleotide exchange factor (GEF) 10-like (ARHGEF10L), transcript variant 1, mRNA [NM_018125]	2854.04	4568.66	4279.23	5020.52	0.507674	1.48839	-0.773157	-0.48768	A_23_P382
ARHGEF11	Homo sapiens Rho guanine nucleotide exchange factor (GEF) 11 (ARHGEF11), transcript variant 2, mRNA [NM_198236]	32.83	62.007	236.828	171.346	-0.573636	0.645726	0.411939	0	A_23_P23421
ARHGEF11	Homo sapiens Rho guanine nucleotide exchange factor (GEF) 11 (ARHGEF11), transcript variant 2, mRNA [NM_198236]	246.804	266.737	1431.96	938.023	-0.138933	0.275064	0.532447	-0.0228634	A_23_P426809
ARHGEF12	Homo sapiens Rho guanine nucleotide exchange factor (GEF) 12 (ARHGEF12), transcript variant 1, mRNA [NM_015313]	2349.51	1704.86	2512.84	2232.57	1.84329	1.68253	0.0750713	-0.0405531	A_23_P127642
ARHGEF12	Homo sapiens Rho guanine nucleotide exchange factor (GEF) 12 (ARHGEF12), transcript variant 1, mRNA [NM_015313]	76.1577	48.0874	177.145	177.826	0.361386	0	-0.285922	-0.225399	A_24_P175783
ARHGEF15	Rho guanine nucleotide exchange factor (GEF) 15 [Source:HGNC Symbol;Acc:15590] [ENST00000455564]	1.85793	1.67199	2.98734	5.18912	0	0.149809	-1.18001	-0.328397	A_24_P359007
ARHGEF15	Homo sapiens Rho guanine nucleotide exchange factor (GEF) 15 (ARHGEF15), transcript variant 1, mRNA [NM_173728]	18.6953	12.2007	738.54	597.092	-1.89486	-2.20863	1.5439	1.29216	A_23_P49674
ARHGEF16	Homo sapiens Rho guanine nucleotide exchange factor (GEF) 16 (ARHGEF16), mRNA [NM_014448]	15.9711	8.83907	2061.14	114.6	-4.96718	-5.51873	0.179477	-3.93429	A_23_P114670
ARHGEF17	Homo sapiens Rho guanine nucleotide exchange factor (GEF) 17 (ARHGEF17), mRNA [NM_014786]	6619.58	5065.21	14692.3	11584.6	0.512678	0.428508	-0.20225	-0.490106	A_23_P76015
ARHGEF17	Homo sapiens Rho guanine nucleotide exchange factor (GEF) 17 (ARHGEF17), mRNA [NM_014786]	5.29875	4.45471	23.427	15.6128	-0.251485	-0.19986	0.0277843	-0.502669	A_24_P196413
ARHGEF18	Homo sapiens Rho/Rac guanine nucleotide exchange factor (GEF) 18 (ARHGEF18), transcript variant 1, mRNA [NM_015318]	3726.78	2960.61	16642.8	9008.74	-0.199821	-0.22991	0.0939007	-0.736609	A_23_P50357
ARHGEF19	Homo sapiens Rho guanine nucleotide exchange factor (GEF) 19 (ARHGEF19), mRNA [NM_153213]	527.818	633.33	3289.95	1286.18	-0.564864	0	0.209912	-1.09007	A_23_P332326
ARHGEF2	Homo sapiens Rho/Rac guanine nucleotide exchange factor (GEF) 2 (ARHGEF2), transcript variant 3, mRNA [NM_004723]	440.504	561.42	1596.39	3432.98	-0.651874	0	-0.659467	0.500176	A_23_P51699
ARHGEF25	Homo sapiens Rho guanine nucleotide exchange factor (GEF) 25 (ARHGEF25), transcript variant 1, mRNA [NM_182947]	91.8776	67.5093	252.174	278.273	0.794295	0.651615	0.38575	0.582827	A_24_P289299
ARHGEF25	Homo sapiens Rho guanine nucleotide exchange factor (GEF) 25 (ARHGEF25), transcript variant 1, mRNA [NM_182947]	412.381	134.859	743.132	808.569	0.879784	-0.4308	-0.135755	0.040988	A_23_P98844
ARHGEF26	Homo sapiens Rho guanine nucleotide exchange factor (GEF) 26 (ARHGEF26), transcript variant 1, mRNA [NM_001251962]	631.857	381.665	3590.01	2828.05	-1.02218	-1.44753	-0.381044	-0.670234	A_32_P5276
ARHGEF26	Homo sapiens Rho guanine nucleotide exchange factor (GEF) 26 (ARHGEF26), transcript variant 2, mRNA [NM_015595]	66.626	38.4355	407.427	316.444	-1.11277	-1.60446	-0.365561	-0.675161	A_23_P69100
ARHGEF26-AS1	Homo sapiens ARHGEF26 antisense RNA 1 (ARHGEF26-AS1), long non-coding RNA [NR_037901]	6.22041	6.98645	3.214	9.19282	0.688999	1.1585	-2.12882	-0.557689	A_24_P740549
ARHGEF28	Homo sapiens Rho guanine nucleotide exchange factor (GEF) 28 (ARHGEF28), transcript variant 2, mRNA [NM_001177693]	148.441	240.265	392.947	642.452	-0.858164	0.138516	-1.3189	-0.554655	A_32_P213330
ARHGEF28	Homo sapiens mRNA for KIAA1998 protein. [AB082529]	3.73134	6.18112	24.3289	30.2519	-2.61035	-1.58023	-1.77063	-1.40128	A_24_P59554
ARHGEF28	Homo sapiens Rho guanine nucleotide exchange factor (GEF) 28 (ARHGEF28), transcript variant 1, mRNA [NM_001080479]	1291.4	1411.83	808.207	2752.83	-0.430584	0	-2.9719	-1.14878	A_23_P81298
ARHGEF28	Homo sapiens Rho guanine nucleotide exchange factor (GEF) 28 (ARHGEF28), transcript variant 2, mRNA [NM_001177693]	2.82351	3.26012	6.37022	4.86293	-0.675843	-0.166463	-1.36717	-1.7017	A_24_P177932
ARHGEF3	Homo sapiens Rho guanine nucleotide exchange factor (GEF) 3 (ARHGEF3), transcript variant 3, mRNA [NM_019555]	353.092	131.695	476.353	1270.14	0.359176	-0.761723	-1.07401	0.395865	A_23_P143885
ARHGEF35	Homo sapiens Rho guanine nucleotide exchange factor (GEF) 35 (ARHGEF35), mRNA [NM_001003702]	6.64084	3.53236	9.71736	222.606	-1.61424	-2.22302	-2.93022	1.64256	A_24_P701776
ARHGEF37	Homo sapiens Rho guanine nucleotide exchange factor (GEF) 37 (ARHGEF37), mRNA [NM_001001669]	128.062	269.056	234.481	343.001	1.50971	2.88272	0.517162	1.12089	A_32_P222695
ARHGEF38	Homo sapiens Rho guanine nucleotide exchange factor (GEF) 38 (ARHGEF38), transcript variant 2, mRNA [NM_017700]	2.13685	1.94196	5.69821	4.48706	0	0.163973	-0.450154	-0.739903	A_23_P252276
ARHGEF39	Homo sapiens Rho guanine nucleotide exchange factor (GEF) 39 (ARHGEF39), mRNA [NM_032818]	34.6017	31.9421	613.64	22.0821	-1.44866	-1.2621	0.834638	-3.90681	A_23_P216517
ARHGEF39	Homo sapiens Rho guanine nucleotide exchange factor (GEF) 39 (ARHGEF39), mRNA [NM_032818]	10.2099	18.8925	234.891	35.8113	-1.29768	-0.107895	1.36109	-1.29742	A_24_P30034
ARHGEF4	Homo sapiens Rho guanine nucleotide exchange factor (GEF) 4 (ARHGEF4), transcript variant 2, mRNA [NM_032995]	184.385	351.862	494.34	6218.8	-1.37295	-0.138712	-1.81534	1.89271	A_23_P253221
ARHGEF4	Homo sapiens Rho guanine nucleotide exchange factor (GEF) 4 (ARHGEF4), transcript variant 1, mRNA [NM_015320]	7.76721	20.0705	16.7137	139.055	-1.20594	0.465612	-1.96556	1.14599	A_24_P302685
ARHGEF40	Homo sapiens Rho guanine nucleotide exchange factor (GEF) 40 (ARHGEF40), transcript variant 1, mRNA [NM_018071]	4617.47	7322.29	4844.11	15169.5	0.707336	1.67447	-1.08871	0.613145	A_23_P99661
ARHGEF5	Homo sapiens Rho guanine nucleotide exchange factor (GEF) 5 (ARHGEF5), mRNA [NM_005435]	41.0234	12.938	302.093	400.457	-0.788276	-2.15116	0.227023	0.688665	A_24_P389218
ARHGEF5	Homo sapiens Rho guanine nucleotide exchange factor (GEF) 5 (ARHGEF5), mRNA [NM_005435]	186.119	34.1727	1050.63	1529.06	-0.631784	-2.77514	0	0.596378	A_23_P93988
ARHGEF6	Rac/Cdc42 guanine nucleotide exchange factor (GEF) 6 [Source:HGNC Symbol;Acc:685] [ENST00000250617]	2.10039	1.79384	5.29577	4.67187	0.330736	0.405082	-0.200254	-0.326103	A_24_P926566
ARHGEF6	Homo sapiens Rac/Cdc42 guanine nucleotide exchange factor (GEF) 6 (ARHGEF6), mRNA [NM_004840]	17.6985	11.2132	10.5184	40.8935	1.77283	1.41634	-0.843059	1.17089	A_23_P85024
ARHGEF6	Homo sapiens Rac/Cdc42 guanine nucleotide exchange factor (GEF) 6 (ARHGEF6), mRNA [NM_004840]	46.9289	36.7581	16.5454	174.81	3.36922	3.31876	0	3.45627	A_24_P228875
ARHGEF7	Homo sapiens Rho guanine nucleotide exchange factor (GEF) 7 (ARHGEF7), transcript variant 2, mRNA [NM_145735]	7.00167	2.10203	21.857	27.3709	-0.000521183	-1.43449	-0.223375	0.156164	A_23_P417891
ARHGEF7	Homo sapiens Rho guanine nucleotide exchange factor (GEF) 7 (ARHGEF7), transcript variant 1, mRNA [NM_003899]	1152.55	1428.86	3898.83	2975.08	0.384147	0.996131	0.277187	-0.0579367	A_23_P321855
ARHGEF9	Homo sapiens Cdc42 guanine nucleotide exchange factor (GEF) 9 (ARHGEF9), transcript variant 1, mRNA [NM_015185]	341.837	266.807	560.949	400.628	1.1341	1.07854	-0.0165143	-0.447129	A_24_P254551
ARHGEF9	Homo sapiens Cdc42 guanine nucleotide exchange factor (GEF) 9 (ARHGEF9), transcript variant 1, mRNA [NM_015185]	116.594	83.745	354.66	315.83	0.316525	0.141059	0.0562949	-0.0560031	A_23_P251705
ARID1A	Homo sapiens AT rich interactive domain 1A (SWI-like) (ARID1A), transcript variant 1, mRNA [NM_006015]	9.20622	4.08778	59.8662	34.8214	-0.602125	-1.47147	0.233759	-0.493016	A_24_P77219
ARID1A	Homo sapiens AT rich interactive domain 1A (SWI-like) (ARID1A), transcript variant 1, mRNA [NM_006015]	230.778	278.401	1653.97	756.655	-0.290975	0.281629	0.685205	-0.388031	A_24_P92952
ARID1A	Homo sapiens AT rich interactive domain 1A (SWI-like) (ARID1A), transcript variant 1, mRNA [NM_006015]	858.396	794.716	2939.07	1891.14	0	0.190743	-0.0895319	-0.670649	A_23_P217872
ARID1B	Homo sapiens AT rich interactive domain 1B (SWI1-like) (ARID1B), transcript variant 1, mRNA [NM_017519]	34.7478	23.1969	569.692	501.778	-1.32482	-1.60587	0.845188	0.717044	A_24_P366735
ARID1B	Homo sapiens AT rich interactive domain 1B (SWI1-like) (ARID1B), transcript variant 1, mRNA [NM_017519]	190.618	269.491	807.685	1066.65	-0.811437	-0.00993633	-0.593505	-0.137298	A_23_P70701
ARID2	Homo sapiens AT rich interactive domain 2 (ARID, RFX-like) (ARID2), mRNA [NM_152641]	293.511	285.659	799.593	579.433	0	0.262828	-0.419326	-0.828959	A_32_P74955
ARID2	AT rich interactive domain 2 (ARID, RFX-like) [Source:HGNC Symbol;Acc:18037] [ENST00000480128]	1.92389	4.1542	60.3452	38.891	-2.79569	-1.3832	0.310273	-0.268538	A_23_P308464
ARID3A	Homo sapiens AT rich interactive domain 3A (BRIGHT-like) (ARID3A), mRNA [NM_005224]	221.373	130.261	339.417	680.053	0.556184	0.0930634	-0.692411	0.365169	A_23_P16516
ARID3A	AT rich interactive domain 3A (BRIGHT-like) [Source:HGNC Symbol;Acc:3031] [ENST00000263620]	255.148	196.379	398.228	1049.92	0.551625	0.475884	-0.67129	0.782313	A_32_P34522
ARID3A	AT rich interactive domain 3A (BRIGHT-like) [Source:HGNC Symbol;Acc:3031] [ENST00000263620]	398.849	337.796	306.715	876.577	1.30032	1.36257	-0.943802	0.62617	A_24_P42495
ARID3B	Homo sapiens AT rich interactive domain 3B (BRIGHT-like) (ARID3B), mRNA [NM_006465]	377.917	829.191	1911.38	866.899	-0.06528	1.3703	0.408016	-0.677671	A_23_P88580
ARID4A	Homo sapiens AT rich interactive domain 4A (RBP1-like) (ARID4A), transcript variant 1, mRNA [NM_002892]	74.3029	54.2193	239.355	165.645	0.959487	0.806821	0.781971	0.305906	A_24_P330309
ARID4A	Homo sapiens AT rich interactive domain 4A (RBP1-like) (ARID4A), transcript variant 1, mRNA [NM_002892]	88.0937	64.3542	250.425	168.66	1.00278	0.851717	0.644868	0.1296	A_23_P117515
ARID4B	Homo sapiens AT rich interactive domain 4B (RBP1-like) (ARID4B), transcript variant 1, mRNA [NM_016374]	502.038	471.778	1032.76	1181.55	0.35081	0.563067	-0.473738	-0.224562	A_23_P201951
ARID4B	AT rich interactive domain 4B (RBP1-like) [Source:HGNC Symbol;Acc:15550] [ENST00000471257]	5.30034	1.82099	10.5554	19.886	-0.620431	-1.85985	-1.49178	-0.52302	A_24_P196499
ARID4B	Homo sapiens AT rich interactive domain 4B (RBP1-like) (ARID4B), transcript variant 1, mRNA [NM_016374]	263.239	172.639	1237.55	1448.16	-0.367867	-0.674532	0	0.281719	A_24_P225308
ARID5A	Homo sapiens AT rich interactive domain 5A (MRF1-like) (ARID5A), mRNA [NM_212481]	323.342	223.448	890.854	601.026	0.275638	0.0444632	-0.127409	-0.640181	A_23_P143016
ARID5B	Homo sapiens AT rich interactive domain 5B (MRF1-like) (ARID5B), transcript variant 1, mRNA [NM_032199]	290.625	212.295	359.773	227.281	2.90733	2.75618	1.35008	0.742461	A_24_P944437
ARID5B	Homo sapiens AT rich interactive domain 5B (MRF1-like) (ARID5B), transcript variant 1, mRNA [NM_032199]	5733.97	1818.26	3517.93	2627.62	3.52352	2.16849	0.953535	0.587559	A_24_P170667
ARID5B	Homo sapiens AT rich interactive domain 5B (MRF1-like) (ARID5B), transcript variant 1, mRNA [NM_032199]	591.683	266.662	707.291	309.606	2.37341	1.52554	0.765709	-0.371172	A_23_P97871
ARID5B	Homo sapiens AT rich interactive domain 5B (MRF1-like) (ARID5B), transcript variant 1, mRNA [NM_032199]	18242.9	9254.65	11606.5	9136	3.08029	2.40315	0.562707	0.272402	A_32_P18440
ARIH1	Homo sapiens ariadne RBR E3 ubiquitin protein ligase 1 (ARIH1), mRNA [NM_005744]	203.79	170.99	1302.56	1010.3	-0.285867	-0.237097	0.525153	0.213566	A_23_P401014
ARIH1	Homo sapiens ariadne RBR E3 ubiquitin protein ligase 1 (ARIH1), mRNA [NM_005744]	247.499	227.921	517.508	640.141	0.394001	0.57706	-0.407021	-0.0452204	A_24_P85478
ARIH1	Homo sapiens ariadne RBR E3 ubiquitin protein ligase 1 (ARIH1), mRNA [NM_005744]	432.986	360.662	1332.78	1446.62	0.150587	0.188863	-0.0925484	0.0806904	A_23_P205855
ARIH2	Homo sapiens ariadne RBR E3 ubiquitin protein ligase 2 (ARIH2), mRNA [NM_006321]	4153.53	3893.29	20673.8	12629.1	0	0.208597	0.450218	-0.205843	A_24_P94651
ARIH2	Homo sapiens ariadne RBR E3 ubiquitin protein ligase 2 (ARIH2), mRNA [NM_006321]	7101.04	4586.82	24833.6	11942.9	0.439932	0.111342	0.380949	-0.620206	A_23_P61881
ARIH2	Homo sapiens ariadne RBR E3 ubiquitin protein ligase 2 (ARIH2), mRNA [NM_006321]	13.4821	9.66779	677.313	295.655	-1.38896	-1.5668	2.39657	1.25565	A_32_P26000
ARIH2OS	Homo sapiens ariadne homolog 2 opposite strand (ARIH2OS), mRNA [NM_001123040]	80.679	83.5765	139.188	90.6553	1.25866	1.61151	0.180248	-0.383327	A_24_P76018
ARL1	Homo sapiens ADP-ribosylation factor-like 1 (ARL1), mRNA [NM_001177]	1617.74	932.621	5935.86	11508.2	-0.401566	-0.894234	-0.391262	0.618856	A_32_P68586
ARL1	Homo sapiens ADP-ribosylation factor-like 1 (ARL1), mRNA [NM_001177]	2681.83	1857.34	4214.68	8263.08	0.776445	0.548408	-0.436527	0.589719	A_32_P36101
ARL1	Homo sapiens ADP-ribosylation factor-like 1 (ARL1), mRNA [NM_001177]	4260.79	3038.45	3248.88	10816.9	1.40774	1.22189	-0.848619	0.941639	A_24_P338648
ARL10	Homo sapiens ADP-ribosylation factor-like 10 (ARL10), mRNA [NM_173664]	4.53478	6.71496	39.461	49.4631	-0.972674	-0.104381	0.283473	0.664387	A_24_P368735
ARL10	ADP-ribosylation factor-like 10 [Source:HGNC Symbol;Acc:22042] [ENST00000310389]	22.1465	22.5334	181.396	184.175	0	0.326933	1.16881	1.24574	A_32_P224751
ARL10	ADP-ribosylation factor-like 10 [Source:HGNC Symbol;Acc:22042] [ENST00000310389]	91.1676	149.403	292.233	674.635	0.184652	1.19921	0	1.26198	A_24_P817209
ARL11	Homo sapiens ADP-ribosylation factor-like 11 (ARL11), mRNA [NM_138450]	2.03749	1.81458	3.51018	4.23691	0.150503	0.285291	-0.929923	-0.603466	A_23_P76573
ARL11	Homo sapiens ADP-ribosylation factor-like 11 (ARL11), mRNA [NM_138450]	1.85421	2.76601	7.5995	7.66807	-0.552183	0.326764	-0.382261	-0.31431	A_24_P378202
ARL11	Homo sapiens ADP-ribosylation factor-like 11 (ARL11), mRNA [NM_138450]	1.88863	1.60259	3.13662	3.94542	0.349967	0.414977	-0.783342	-0.397384	A_32_P902957
ARL13B	Homo sapiens ADP-ribosylation factor-like 13B (ARL13B), transcript variant 1, mRNA [NM_182896]	297.307	249.383	2189.33	885.873	-0.737083	-0.688727	0.278201	-0.972123	A_24_P328668
ARL13B	Homo sapiens ADP-ribosylation factor-like 13B (ARL13B), transcript variant 1, mRNA [NM_182896]	139.704	121.975	743.776	408.172	-0.208086	-0.101932	0.339227	-0.471473	A_23_P10081
ARL14	Homo sapiens ADP-ribosylation factor-like 14 (ARL14), mRNA [NM_025047]	1.99513	4.18097	4.49598	176.762	-3.34186	-1.97255	-4.03488	1.31714	A_23_P92161
ARL14EP	Homo sapiens ADP-ribosylation factor-like 14 effector protein (ARL14EP), mRNA [NM_152316]	448.863	296.196	910.172	1052.2	0.558923	0.261147	-0.286388	-0.0221958	A_24_P73036
ARL14EP	Homo sapiens ADP-ribosylation factor-like 14 effector protein (ARL14EP), mRNA [NM_152316]	38.6616	15.4054	141.797	221.482	0.569235	-0.456282	0.578911	1.27727	A_23_P345778
ARL15	Homo sapiens ADP-ribosylation factor-like 15 (ARL15), mRNA [NM_019087]	17.6703	14.7139	25.3527	63.9468	0.436007	0.473804	-0.908358	0.481365	A_24_P303199
ARL16	Homo sapiens ADP-ribosylation factor-like 16 (ARL16), mRNA [NM_001040025]	1807.27	1384.55	8854.13	6797.19	-0.296414	-0.378861	0.130947	-0.195475	A_32_P207180
ARL17A	Homo sapiens ADP-ribosylation factor-like 17A (ARL17A), transcript variant 1, mRNA [NM_001113738]	277.862	284.286	357.206	555.625	-0.0450811	0.28984	-1.54787	-0.855525	A_23_P4153
ARL17A	Homo sapiens ADP-ribosylation factor-like 17A (ARL17A), transcript variant 3, mRNA [NM_001288811]	54.4545	41.2727	57.9346	115.777	-0.491225	-0.589142	-2.26703	-1.21318	A_24_P579826
ARL17A	Homo sapiens ADP-ribosylation factor-like 17A (ARL17A), transcript variant 3, mRNA [NM_001288811]	2.17766	1.91527	4.61014	24.317	-1.77637	-1.65966	-2.55952	-0.105445	A_24_P921186
ARL17A	Homo sapiens ADP-ribosylation factor-like 17A (ARL17A), transcript variant 2, mRNA [NM_016632]	76.5824	42.6471	130.512	119.464	-0.863821	-1.40644	-1.95989	-2.03251	A_23_P371885
ARL17B	Homo sapiens ADP-ribosylation factor-like 17B (ARL17B), transcript variant 1, mRNA [NM_001039083]	108.177	37.1433	106.962	177.259	0.568008	-0.672269	-1.31347	-0.529717	A_23_P207680
ARL2	Homo sapiens ADP-ribosylation factor-like 2 (ARL2), transcript variant 1, mRNA [NM_001667]	2498.29	2657.6	6638.57	5902.18	-0.485849	-0.0947189	-0.941094	-1.05573	A_23_P98252
ARL2BP	Homo sapiens ADP-ribosylation factor-like 2 binding protein (ARL2BP), mRNA [NM_012106]	4335.42	3637.76	14324.3	17609.2	0.00431633	0.0531416	-0.136637	0.216219	A_23_P15182
ARL3	Homo sapiens ADP-ribosylation factor-like 3 (ARL3), mRNA [NM_004311]	7881.95	6738.85	14607.2	30001.7	0.345531	0.421427	-0.629593	0.463763	A_23_P63711
ARL3	Homo sapiens ADP-ribosylation factor-like 3 (ARL3), mRNA [NM_004311]	158.523	349.387	143.622	258.835	0.590111	2.03219	-1.41748	-0.512734	A_24_P286935
ARL4A	Homo sapiens ADP-ribosylation factor-like 4A (ARL4A), transcript variant 1, mRNA [NM_005738]	169.419	71.2511	265.77	610.512	-0.147082	-1.09474	-1.36267	-0.107841	A_23_P145761
ARL4A	Homo sapiens ADP-ribosylation factor-like 4A (ARL4A), transcript variant 1, mRNA [NM_005738]	152.716	62.6532	139.493	445.977	-0.0282674	-1.01171	-2.0241	-0.292337	A_32_P806841
ARL4C	Homo sapiens ADP-ribosylation factor-like 4C (ARL4C), transcript variant 2, mRNA [NM_005737]	268.279	486.679	1238.46	4025.03	-1.61226	-0.45108	-1.2707	0.484743	A_23_P317620
ARL4D	Homo sapiens ADP-ribosylation factor-like 4D (ARL4D), mRNA [NM_001661]	453.413	480.012	1213.8	1311.5	0.0990992	0.48329	-0.345443	-0.178766	A_24_P125273
ARL4D	Homo sapiens ADP-ribosylation factor-like 4D (ARL4D), mRNA [NM_001661]	485.337	485.612	1295.13	1526.9	0.241418	0.54418	-0.20772	0.0847817	A_23_P55179
ARL5A	Homo sapiens ADP-ribosylation factor-like 5A (ARL5A), transcript variant 1, mRNA [NM_012097]	644.071	502.019	1000.92	1263.01	0.704008	0.646476	-0.525142	-0.134604	A_24_P165595
ARL5A	Homo sapiens ADP-ribosylation factor-like 5A (ARL5A), transcript variant 1, mRNA [NM_012097]	957.464	801.576	2271.52	2576.48	0.182387	0.227955	-0.43642	-0.199688	A_23_P101943
ARL5B	Homo sapiens ADP-ribosylation factor-like 5B (ARL5B), mRNA [NM_178815]	84.0243	61.1703	341.315	200.123	-0.0560555	-0.212085	0.10099	-0.614235	A_24_P943997
ARL5B	Homo sapiens ADP-ribosylation factor-like 5B (ARL5B), mRNA [NM_178815]	31.5786	25.1761	149.979	60.4095	-0.367146	-0.392096	0.0154209	-1.24151	A_23_P378588
ARL5B	ADP-ribosylation factor-like 5B [Source:HGNC Symbol;Acc:23052] [ENST00000377275]	712.546	1519.33	3636.6	1561.26	-0.485774	0.908554	0.000582695	-1.1643	A_24_P389612
ARL6	Homo sapiens ADP-ribosylation factor-like 6 (ARL6), transcript variant 1, mRNA [NM_032146]	31.0341	33.0879	185.382	304.274	-0.956493	-0.562099	-0.243094	0.526762	A_24_P354337
ARL6IP1	Homo sapiens ADP-ribosylation factor-like 6 interacting protein 1 (ARL6IP1), mRNA [NM_015161]	5204.39	5128.68	43517.5	10011.7	-0.301246	-0.020442	0.897373	-1.16755	A_24_P356218
ARL6IP1	Homo sapiens ADP-ribosylation factor-like 6 interacting protein 1 (ARL6IP1), mRNA [NM_015161]	1654.63	1820.61	19029.6	3971.78	-0.4101	0.0297613	1.24839	-0.95701	A_23_P118150
ARL6IP4	Homo sapiens ADP-ribosylation factor-like 6 interacting protein 4 (ARL6IP4), transcript variant 1, mRNA [NM_018694]	8492.33	6438.89	37173	21835.2	-0.264775	-0.362178	7.05719e-05	-0.712536	A_23_P47848
ARL6IP4	Homo sapiens ADP-ribosylation factor-like 6 interacting protein 4 (ARL6IP4), transcript variant 1, mRNA [NM_018694]	3867.65	2827.71	26364.8	14289.8	-0.903908	-1.05378	0	-0.828635	A_24_P184460
ARL6IP4	Homo sapiens ADP-ribosylation factor-like 6 interacting protein 4 (ARL6IP4), transcript variant 4, mRNA [NM_001002252]	25635.8	20785	91358.5	54545	0	-0.000667572	-0.0317974	-0.7209	A_24_P287233
ARL6IP5	Homo sapiens ADP-ribosylation factor-like 6 interacting protein 5 (ARL6IP5), mRNA [NM_006407]	6541.79	6430.61	13003.5	21025.8	0.687995	0.965212	-0.186035	0.562208	A_24_P257348
ARL6IP5	Homo sapiens ADP-ribosylation factor-like 6 interacting protein 5 (ARL6IP5), mRNA [NM_006407]	4889.33	3818.6	6181.08	13102	1.07364	1.019	-0.45331	0.685535	A_23_P166640
ARL6IP6	Homo sapiens ADP-ribosylation factor-like 6 interacting protein 6 (ARL6IP6), transcript variant 1, mRNA [NM_152522]	2298.54	1301.1	7125.47	2909.05	0.519031	0	0.286125	-0.951322	A_23_P28169
ARL8A	Homo sapiens ADP-ribosylation factor-like 8A (ARL8A), transcript variant 1, mRNA [NM_138795]	53.5869	62.3583	386.284	313.282	-0.665139	-0.144489	0.319393	0.0721869	A_23_P415033
ARL8A	Homo sapiens ADP-ribosylation factor-like 8A (ARL8A), transcript variant 1, mRNA [NM_138795]	9897.76	8875.22	17613.6	21097.2	0.526962	0.671589	-0.506702	-0.191343	A_23_P138271
ARL8B	Homo sapiens ADP-ribosylation factor-like 8B (ARL8B), mRNA [NM_018184]	14873.7	9990.15	20509.7	25214.3	1.09612	0.823889	-0.305507	0.0474195	A_23_P385217
ARL8B	Homo sapiens ADP-ribosylation factor-like 8B (ARL8B), mRNA [NM_018184]	225.369	113.938	1259.27	1253.61	-0.388241	-1.07033	0.228809	0.277305	A_24_P377065
ARL9	ADP-ribosylation factor-like 9 [Source:HGNC Symbol;Acc:23592] [ENST00000360096]	129.391	194.148	30.1284	397.117	0.467482	1.35484	-3.50024	0.275119	A_23_P58137
ARMC1	Homo sapiens armadillo repeat containing 1 (ARMC1), transcript variant 1, mRNA [NM_018120]	1691.75	1379.82	4671.62	2758.52	0.12163	0.129538	-0.278138	-0.983177	A_32_P234827
ARMC10	Homo sapiens armadillo repeat containing 10 (ARMC10), transcript variant A, mRNA [NM_031905]	961.344	637.86	2408.62	4273.58	-0.364007	-0.653872	-0.904101	-0.0218725	A_32_P90080
ARMC10	Homo sapiens armadillo repeat containing 10 (ARMC10), transcript variant A, mRNA [NM_031905]	1332.55	729.321	5585.61	9515.19	-0.810307	-1.37792	-0.607958	0.215549	A_23_P32913
ARMC12	Homo sapiens armadillo repeat containing 12 (ARMC12), transcript variant 1, mRNA [NM_145028]	19.0391	13.129	8.95424	44.0382	1.18626	0.952004	-1.76724	0.585867	A_32_P146113
ARMC2	Homo sapiens armadillo repeat containing 2 (ARMC2), transcript variant 1, mRNA [NM_032131]	16.0479	11.1851	3.51606	97.8431	1.31144	1.09259	-2.74409	2.10934	A_24_P320604
ARMC2	Homo sapiens armadillo repeat containing 2 (ARMC2), transcript variant 1, mRNA [NM_032131]	1.84143	1.69338	3.05889	46.4223	0	0.181029	-1.13299	2.84574	A_23_P254140
ARMC3	Homo sapiens armadillo repeat containing 3 (ARMC3), transcript variant 1, mRNA [NM_173081]	5.34318	3.8083	3.40679	3.96361	1.39238	1.20578	-1.12208	-0.848687	A_23_P86540
ARMC4	Homo sapiens armadillo repeat containing 4 (ARMC4), transcript variant 3, mRNA [NM_018076]	84.0342	69.5214	111.956	77.7224	0.485346	0.513772	-0.965953	-1.43749	A_32_P141418
ARMC4	armadillo repeat containing 4 [Source:HGNC Symbol;Acc:25583] [ENST00000239715]	2.09821	1.7896	3.95736	4.59651	0.373902	0.446326	-0.575897	-0.304905	A_23_P63600
ARMC5	Homo sapiens armadillo repeat containing 5 (ARMC5), transcript variant 2, mRNA [NM_024742]	853.568	1025.89	2705.99	2653.1	-0.234842	0.332404	-0.435442	-0.408928	A_32_P512500
ARMC6	Homo sapiens armadillo repeat containing 6 (ARMC6), transcript variant 2, mRNA [NM_033415]	1011.97	940.428	5593.88	3958.24	-0.317916	-0.121741	0.283595	-0.160406	A_23_P425750
ARMC7	Homo sapiens armadillo repeat containing 7 (ARMC7), mRNA [NM_024585]	275.94	199.381	3102.95	1342.64	-1.14375	-1.31064	0.482284	-0.671293	A_23_P15375
ARMC8	Homo sapiens armadillo repeat containing 8 (ARMC8), transcript variant 3, mRNA [NM_213654]	118.154	92.7318	1061.91	551.559	-1.14711	-1.1947	0.155629	-0.734452	A_23_P18384
ARMC8	Homo sapiens armadillo repeat containing 8 (ARMC8), transcript variant 2, mRNA [NM_015396]	551.204	363.403	2422.03	1977.71	0.305022	0.00595188	0.575401	0.338009	A_23_P29784
ARMC8	Homo sapiens armadillo repeat containing 8 (ARMC8), transcript variant 3, mRNA [NM_213654]	426.449	363.947	2189.04	1354.32	-0.574795	-0.501494	-0.0801182	-0.717856	A_24_P187954
ARMC8	Homo sapiens armadillo repeat containing 8 (ARMC8), transcript variant 2, mRNA [NM_015396]	207.014	176.036	1292.98	1149	-0.412567	-0.344479	0.365153	0.249826	A_24_P211869
ARMC9	Homo sapiens armadillo repeat containing 9 (ARMC9), transcript variant 1, mRNA [NM_001271466]	51.3102	91.1016	92.3754	497.344	-0.794189	0.33599	-1.8111	0.672553	A_24_P945408
ARMC9	Homo sapiens armadillo repeat containing 9 (ARMC9), transcript variant 2, mRNA [NM_025139]	683.082	649.477	1207.68	3118.9	0.0388346	0.268	-1.00423	0.419554	A_23_P209735
ARMC9	Homo sapiens armadillo repeat containing 9 (ARMC9), transcript variant 2, mRNA [NM_025139]	5658.55	5402.79	4823.45	13602.6	0.653098	0.888316	-1.44245	0.108288	A_23_P209731
ARMCX1	Homo sapiens armadillo repeat containing, X-linked 1 (ARMCX1), mRNA [NM_016608]	2856.75	2997.66	242.842	9610.92	0.82345	1.19486	-4.59801	0.763564	A_23_P22682
ARMCX2	Homo sapiens armadillo repeat containing, X-linked 2 (ARMCX2), transcript variant 2, mRNA [NM_014782]	12354.8	11008.5	21.8192	20325.1	3.15799	3.29348	-7.85244	2.066	A_23_P73747
ARMCX3	Homo sapiens armadillo repeat containing, X-linked 3 (ARMCX3), transcript variant 1, mRNA [NM_016607]	351.107	429.669	340.517	2241.76	1.0612	1.65446	-0.848166	1.92566	A_23_P217611
ARMCX3	Homo sapiens armadillo repeat containing, X-linked 3 (ARMCX3), transcript variant 1, mRNA [NM_016607]	63.6726	38.8024	771.194	1966.91	-1.13032	-1.5429	0.602856	2.00861	A_24_P23411
ARMCX4	Homo sapiens armadillo repeat containing, X-linked 4 (ARMCX4), transcript variant 2, long non-coding RNA [NR_028407]	8.55148	4.03638	3.4181	4.69375	1.47764	0.696471	-1.71052	-1.19798	A_24_P195821
ARMCX4	Homo sapiens armadillo repeat containing, X-linked 4 (ARMCX4), transcript variant 1, mRNA [NM_001256155]	4.64036	1.77924	3.09532	3.88559	1.42513	0.344095	-1.0242	-0.641162	A_24_P374375
ARMCX5	Homo sapiens armadillo repeat containing, X-linked 5 (ARMCX5), transcript variant 2, mRNA [NM_022838]	970.84	1462.41	1905.59	1925.72	0.430614	1.3236	-0.461627	-0.391479	A_23_P85188
ARMCX6	Homo sapiens armadillo repeat containing, X-linked 6 (ARMCX6), transcript variant 1, mRNA [NM_019007]	6129.13	5183.31	10876.5	17130.4	0.419852	0.479991	-0.617869	0.0924711	A_32_P104460
ARMCX6	Homo sapiens armadillo repeat containing, X-linked 6 (ARMCX6), transcript variant 1, mRNA [NM_019007]	3988.93	3690.34	6140.15	9336.99	0.802925	0.992625	-0.439979	0.219695	A_23_P62351
ARNT	Homo sapiens aryl hydrocarbon receptor nuclear translocator (ARNT), transcript variant 1, mRNA [NM_001668]	129.84	76.267	240.696	391.639	1.06672	0.601063	0.0920205	0.849325	A_23_P550
ARNT	Homo sapiens aryl hydrocarbon receptor nuclear translocator (ARNT), transcript variant 1, mRNA [NM_001668]	72.8248	73.6413	738.888	981.653	-0.82499	-0.506959	0.652685	1.11753	A_24_P391568
ARNT2	Homo sapiens aryl-hydrocarbon receptor nuclear translocator 2 (ARNT2), mRNA [NM_014862]	1488.34	692.183	739.205	1022.82	0.542548	-0.259989	-2.33229	-1.80879	A_23_P83579
ARNTL	Homo sapiens aryl hydrocarbon receptor nuclear translocator-like (ARNTL), transcript variant 3, mRNA [NM_001030273]	666.469	2028.34	1100.55	1922.48	0.919155	2.82679	-0.22241	0.637331	A_23_P162037
ARNTL2	Homo sapiens aryl hydrocarbon receptor nuclear translocator-like 2 (ARNTL2), transcript variant 1, mRNA [NM_020183]	1988.75	1557.88	1381.97	2435.31	0.367518	0.317186	-2.0228	-1.15043	A_32_P399546
ARNTL2	Homo sapiens aryl hydrocarbon receptor nuclear translocator-like 2 (ARNTL2), transcript variant 1, mRNA [NM_020183]	88.7647	48.2564	71.2545	112.132	-0.248277	-0.825594	-2.43046	-1.72132	A_23_P76145
ARNTL2	Homo sapiens aryl hydrocarbon receptor nuclear translocator-like 2 (ARNTL2), transcript variant 1, mRNA [NM_020183]	288.475	147.198	534.642	600.204	-0.142322	-0.81106	-1.11737	-0.895501	A_23_P53345
ARPC1A	Homo sapiens actin related protein 2/3 complex, subunit 1A, 41kDa (ARPC1A), transcript variant 1, mRNA [NM_006409]	11339.2	6923.85	29122.2	37631	0.242753	-0.166974	-0.261624	0.163167	A_24_P72479
ARPC1B	Homo sapiens actin related protein 2/3 complex, subunit 1B, 41kDa (ARPC1B), mRNA [NM_005720]	12584.8	12719.2	23860.2	36673.3	0.0351725	0.352449	-0.907078	-0.23196	A_23_P20196
ARPC2	Homo sapiens actin related protein 2/3 complex, subunit 2, 34kDa (ARPC2), transcript variant 1, mRNA [NM_152862]	24316.2	19260.4	127927	139368	-0.552877	-0.587214	-0.022728	0.155844	A_23_P102122
ARPC3	Homo sapiens actin related protein 2/3 complex, subunit 3, 21kDa (ARPC3), transcript variant 1, mRNA [NM_001278556]	9136.44	7924.53	53112.9	90647.9	-0.979811	-0.883172	-0.30563	0.520571	A_24_P167473
ARPC4	Homo sapiens actin related protein 2/3 complex, subunit 4, 20kDa (ARPC4), transcript variant 1, mRNA [NM_005718]	373.7	307.952	2590.97	1286.01	-0.0744743	-0.0517044	0.853887	-0.101707	A_24_P20383
ARPC4	Homo sapiens actin related protein 2/3 complex, subunit 4, 20kDa (ARPC4), transcript variant 1, mRNA [NM_005718]	415.191	413.422	2913.72	1279.39	-0.199937	0.09585	0.745901	-0.386513	A_23_P29566
ARPC4-TTLL3	Homo sapiens ARPC4-TTLL3 readthrough (ARPC4-TTLL3), mRNA [NM_001198793]	328.068	431.555	908.436	1558.23	0.334682	1.03218	-0.0611052	0.772335	A_23_P380928
ARPC4-TTLL3	Homo sapiens ARPC4-TTLL3 readthrough (ARPC4-TTLL3), mRNA [NM_001198793]	104.819	153.047	519.938	671.858	-0.656224	0.191796	-0.210959	0.213847	A_24_P37540
ARPC4-TTLL3	Homo sapiens cDNA FLJ14048 fis, clone HEMBA1006650, weakly similar to ARP2/3 COMPLEX 20 KD SUBUNIT. [AK024110]	19.2629	12.1065	71.7758	47.6359	0.8073	0.439206	0.839794	0.303338	A_23_P391382
ARPC5	Homo sapiens actin related protein 2/3 complex, subunit 5, 16kDa (ARPC5), transcript variant 1, mRNA [NM_005717]	14346.4	13123.8	49811.6	30454.9	0.288383	0.461832	0.219004	-0.435815	A_23_P126803
ARPC5L	Homo sapiens actin related protein 2/3 complex, subunit 5-like (ARPC5L), mRNA [NM_030978]	1935.86	967.087	10346.6	9533.97	-0.489914	-1.18923	0.0630226	0	A_24_P29975
ARPP19	Homo sapiens cAMP-regulated phosphoprotein, 19kDa (ARPP19), mRNA [NM_006628]	678.166	656.273	3554.61	2135.98	-0.0980291	0.156575	0.426777	-0.253029	A_24_P313262
ARPP19	Homo sapiens cAMP-regulated phosphoprotein, 19kDa (ARPP19), mRNA [NM_006628]	3603.97	3262.71	9720.18	8420.18	0.199361	0.35779	-0.23442	-0.386562	A_23_P205768
ARPP21	Homo sapiens cAMP-regulated phosphoprotein, 21kDa (ARPP21), transcript variant 4, mRNA [NM_001025069]	1.84046	1.65698	3.13757	3.83716	0.174116	0.324551	-0.921483	-0.576101	A_23_P143838
ARPP21	Homo sapiens cAMP-regulated phosphoprotein, 21kDa (ARPP21), transcript variant 1, mRNA [NM_016300]	2.21542	8.12923	3.19607	10.0066	0.381315	2.5588	-0.955147	0.746422	A_23_P315602
ARR3	Homo sapiens arrestin 3, retinal (X-arrestin) (ARR3), mRNA [NM_004312]	2.13847	1.76993	3.68111	7.35532	0	0.0290632	-1.08161	-0.027976	A_24_P344976
ARRB1	Homo sapiens arrestin, beta 1 (ARRB1), transcript variant 1, mRNA [NM_004041]	36.9763	3.39949	313.508	340.477	-1.76518	-4.90644	-0.546524	-0.372479	A_24_P386622
ARRB1	Homo sapiens arrestin, beta 1 (ARRB1), transcript variant 1, mRNA [NM_004041]	214.926	29.6567	896.324	746.316	-0.831284	-3.38675	-0.636279	-0.845522	A_23_P203702
ARRB2	Homo sapiens arrestin, beta 2 (ARRB2), transcript variant 1, mRNA [NM_004313]	517.722	325.082	5171.32	585.8	-0.0752668	-0.444694	1.37984	-1.70722	A_23_P158829
ARRDC1	Homo sapiens arrestin domain containing 1 (ARRDC1), mRNA [NM_152285]	423.026	579.579	3477.79	906.014	-0.892038	-0.135834	0.282138	-1.60344	A_23_P391607
ARRDC1	Homo sapiens arrestin domain containing 1 (ARRDC1), mRNA [NM_152285]	57.8333	72.1132	572.864	159.634	-0.817709	-0.197399	0.625334	-1.1631	A_23_P332316
ARRDC2	Homo sapiens arrestin domain containing 2 (ARRDC2), transcript variant 2, mRNA [NM_001025604]	375.218	515.4	1660.09	1029.81	-0.20093	0.55898	0.0793486	-0.554534	A_24_P22976
ARRDC2	Homo sapiens arrestin domain containing 2 (ARRDC2), transcript variant 2, mRNA [NM_001025604]	162.807	188.499	1437.2	958.72	-1.0376	-0.52426	0.239249	-0.289844	A_23_P130965
ARRDC3	Homo sapiens arrestin domain containing 3 (ARRDC3), mRNA [NM_020801]	606.456	734.52	270.276	1442.78	1.29782	1.87617	-1.73332	0.73801	A_24_P274615
ARRDC3	Homo sapiens arrestin domain containing 3 (ARRDC3), mRNA [NM_020801]	2.17948	2.31439	5.53283	18.7741	-1.07264	-0.684045	-1.59378	0.223858	A_24_P414553
ARRDC4	Homo sapiens arrestin domain containing 4 (ARRDC4), mRNA [NM_183376]	1001.75	214.299	998.953	6638.66	1.37175	-0.551137	-0.497467	2.28993	A_23_P339818
ARRDC5	Homo sapiens arrestin domain containing 5 (ARRDC5), mRNA [NM_001080523]	1.98377	1.77535	4.05274	4.83073	0	0.141806	-0.834526	-0.526194	A_32_P30271
ARSA	Homo sapiens arylsulfatase A (ARSA), transcript variant 1, mRNA [NM_000487]	737.96	678.881	370.906	1679.93	1.04551	1.22707	-1.81216	0.422106	A_23_P255436
ARSB	Homo sapiens arylsulfatase B (ARSB), transcript variant 2, mRNA [NM_198709]	94.8508	122.174	190.144	505.75	0.041379	0.708529	-0.820439	0.645884	A_24_P205213
ARSD	Homo sapiens arylsulfatase D (ARSD), mRNA [NM_001669]	26.76	27.6993	122.293	127.418	-0.357962	-0.00624132	-0.0309405	0.0832739	A_23_P217712
ARSD	arylsulfatase D [Source:HGNC Symbol;Acc:717] [ENST00000481340]	30.1908	22.959	45.706	45.062	-0.00340033	-0.0965037	-1.2703	-1.23578	A_23_P357760
ARSE	Homo sapiens arylsulfatase E (chondrodysplasia punctata 1) (ARSE), transcript variant 2, mRNA [NM_000047]	1.94779	16.0646	3.16743	29.3158	-1.50374	1.84218	-2.66745	0.597838	A_23_P256084
ARSF	Homo sapiens arylsulfatase F (ARSF), transcript variant 1, mRNA [NM_004042]	12.8858	7.40316	12.0793	15.3744	1.15897	0.661346	-0.799454	-0.396466	A_23_P304304
ARSG	Homo sapiens arylsulfatase G (ARSG), transcript variant 1, mRNA [NM_014960]	156.779	146.899	17.9143	108.689	2.45064	2.65868	-2.54409	0.111931	A_24_P339416
ARSG	arylsulfatase G [Source:HGNC Symbol;Acc:24102] [ENST00000448504]	80.6153	82.4623	4.56684	116.434	2.40546	2.74009	-3.6015	1.12567	A_23_P4161
ARSI	Homo sapiens arylsulfatase family, member I (ARSI), mRNA [NM_001012301]	334.119	85.659	793.977	6672.23	-1.55999	-3.22173	-2.17643	0.949561	A_23_P19030
ARSJ	Homo sapiens arylsulfatase family, member J (ARSJ), mRNA [NM_024590]	3279.74	2101.19	7235.84	2134.16	2.73394	2.39352	2.01034	0.303841	A_23_P213298
ARSK	Homo sapiens arylsulfatase family, member K (ARSK), mRNA [NM_198150]	196.931	157.174	146.92	496.589	1.53871	1.51533	-0.74912	1.06289	A_23_P312536
ART1	Homo sapiens ADP-ribosyltransferase 1 (ART1), mRNA [NM_004314]	7.75568	6.87835	7.33747	10.1217	1.42606	1.55482	-0.519085	0	A_23_P87363
ART3	Homo sapiens ADP-ribosyltransferase 3 (ART3), transcript variant 2, mRNA [NM_001179]	6.15714	3.30273	3.53059	28.5943	1.30092	0.70427	-1.3666	1.70613	A_23_P80918
ART4	Homo sapiens ADP-ribosyltransferase 4 (Dombrock blood group) (ART4), mRNA [NM_021071]	2.01363	1.79155	51.8912	8.70554	-0.40781	-0.27445	2.41464	-0.105858	A_23_P116902
ART5	Homo sapiens ADP-ribosyltransferase 5 (ART5), transcript variant 1, mRNA [NM_053017]	28.651	3.65251	50.4767	75.315	2.01708	-0.652591	0.968942	1.60125	A_23_P427122
ARTN	Homo sapiens artemin (ARTN), transcript variant 2, mRNA [NM_057091]	75.5484	57.3241	373.679	364.613	-0.132732	-0.229044	0.308418	0.327973	A_24_P251040
ARV1	Homo sapiens ARV1 homolog (S. cerevisiae) (ARV1), mRNA [NM_022786]	493.609	334.731	1220.97	1400.93	0.289863	0.0314446	-0.268724	-0.0153761	A_24_P144527
ARV1	Homo sapiens cDNA FLJ35668 fis, clone SPLEN2018112. [AK092987]	2.39599	5.65487	37.4632	22.0875	-2.58368	-1.04286	-0.48208	-1.18933	A_24_P919920
ARV1	Homo sapiens ARV1 homolog (S. cerevisiae) (ARV1), mRNA [NM_022786]	1778.69	1397.43	4656.16	5221.24	-0.120186	-0.166283	-0.597041	-0.376797	A_23_P135995
ARVCF	Homo sapiens armadillo repeat gene deleted in velocardiofacial syndrome (ARVCF), mRNA [NM_001670]	3.20659	6.6191	1705.69	305.142	-1.94731	-0.599764	5.24261	2.81481	A_24_P416961
ARVCF	Homo sapiens armadillo repeat gene deleted in velocardiofacial syndrome (ARVCF), mRNA [NM_001670]	48.1987	103.921	740.228	139.667	-0.395437	1.01493	1.68029	-0.670696	A_23_P109393
ARVP6125	Homo sapiens clone DNA165325 ARVP6125 (UNQ6125) mRNA, complete cds. [AY358247]	1.9311	1.69682	3.21279	4.00273	0.298387	0.413743	-0.832384	-0.460237	A_24_P927614
ARX	Homo sapiens aristaless related homeobox (ARX), mRNA [NM_139058]	6.65705	9.52851	22.2547	14.4777	-0.231385	0.58793	-0.355409	-0.920694	A_23_P306223
AS3MT	Homo sapiens arsenite methyltransferase (AS3MT), mRNA [NM_020682]	6.72829	3.87161	6.9899	8.30045	-0.0454025	-0.540762	-1.85555	-1.55264	A_23_P12643
ASAH1	Homo sapiens cDNA: FLJ21558 fis, clone COL06372. [AK025211]	2.11854	2.40864	35.7862	36.7407	-2.21309	-1.72599	0	0.0929666	A_24_P928637
ASAH1	Homo sapiens N-acylsphingosine amidohydrolase (acid ceramidase) 1 (ASAH1), transcript variant 1, mRNA [NM_177924]	677.231	550.539	1083.93	6472.92	0.39102	0.394162	-0.795603	1.83753	A_23_P216325
ASAH2	Homo sapiens N-acylsphingosine amidohydrolase (non-lysosomal ceramidase) 2 (ASAH2), transcript variant 1, mRNA [NM_019893]	63.5937	19.3323	113.057	172.445	0.852268	-0.563657	-0.182816	0.481258	A_23_P161171
ASAP1	Homo sapiens ArfGAP with SH3 domain, ankyrin repeat and PH domain 1 (ASAP1), transcript variant 1, mRNA [NM_018482]	121.107	80.5149	1592.48	975.309	-0.762733	-1.04974	1.08901	0.436658	A_23_P44831
ASAP1	Homo sapiens ArfGAP with SH3 domain, ankyrin repeat and PH domain 1 (ASAP1), transcript variant 1, mRNA [NM_018482]	555.409	274.689	4280.39	2996.11	-0.619637	-1.33344	0.461308	0.00164413	A_23_P216278
ASAP1	Homo sapiens ArfGAP with SH3 domain, ankyrin repeat and PH domain 1 (ASAP1), transcript variant 1, mRNA [NM_018482]	117.939	79.2076	1320.82	997.486	-0.624569	-0.896955	0.995576	0.645498	A_23_P71526
ASAP1-IT1	Homo sapiens HSPC054 mRNA, complete cds. [AF161539]	1.90234	1.70259	76.0655	65.3911	-1.0878	-0.945904	2.36841	2.20525	A_24_P360499
ASAP1-IT1	Homo sapiens ASAP1 intronic transcript 1 (non-protein coding) (ASAP1-IT1), long non-coding RNA [NR_002765]	24.8651	23.1854	800.091	545.309	-2.36357	-2.16253	0.779225	0.281126	A_23_P146325
ASAP1-IT2	Homo sapiens ASAP1 intronic transcript 2 (non-protein coding) (ASAP1-IT2), long non-coding RNA [NR_045385]	1.87968	1.69163	272.248	166.373	-4.91492	-4.76505	0.398193	-0.257315	A_24_P162128
ASAP2	Homo sapiens ArfGAP with SH3 domain, ankyrin repeat and PH domain 2 (ASAP2), transcript variant 1, mRNA [NM_003887]	14.8331	18.4396	316.987	205.282	-2.09376	-1.47783	0.458595	-0.113229	A_23_P40088
ASAP2	Homo sapiens ArfGAP with SH3 domain, ankyrin repeat and PH domain 2 (ASAP2), transcript variant 1, mRNA [NM_003887]	370.9	639.868	3236.79	2766.86	-1.42141	-0.332718	-0.161122	-0.332449	A_24_P362540
ASAP3	Homo sapiens ArfGAP with SH3 domain, ankyrin repeat and PH domain 3 (ASAP3), transcript variant 1, mRNA [NM_017707]	1412.88	851.695	2002.15	1472.92	1.07251	0.64423	-0.289753	-0.677636	A_23_P114689
ASB1	Homo sapiens ankyrin repeat and SOCS box containing 1 (ASB1), mRNA [NM_001040445]	1020.56	932.652	3057.06	3807.44	0.115709	0.287706	-0.166681	0.204983	A_32_P183609
ASB1	Homo sapiens ankyrin repeat and SOCS box containing 1 (ASB1), mRNA [NM_001040445]	1805.56	1135.77	3083.11	3019.02	0.704841	0.338004	-0.388398	-0.363714	A_23_P165360
ASB10	Homo sapiens ankyrin repeat and SOCS box containing 10 (ASB10), transcript variant 3, mRNA [NM_080871]	12.9836	8.13173	55.6777	64.2729	-0.125359	-0.498465	0.109878	0.37198	A_23_P427634
ASB11	Homo sapiens ankyrin repeat and SOCS box containing 11, E3 ubiquitin protein ligase (ASB11), transcript variant 1, mRNA [NM_080873]	2.20801	1.93787	3.4915	3.99491	0.504391	0.618061	-0.699684	-0.450379	A_23_P114259
ASB12	Homo sapiens ankyrin repeat and SOCS box containing 12 (ASB12), mRNA [NM_130388]	2.46079	3.03942	5.11709	13.6383	-0.207869	0.398751	-1.01685	0.452409	A_23_P96395
ASB13	Homo sapiens ankyrin repeat and SOCS box containing 13 (ASB13), transcript variant 1, mRNA [NM_024701]	112.838	172.497	618.072	487.296	-0.14015	0.774106	0.448189	0.160202	A_23_P202510
ASB13	Homo sapiens ankyrin repeat and SOCS box containing 13 (ASB13), transcript variant 1, mRNA [NM_024701]	770.621	540.173	2181.87	2182.53	0.482186	0.271533	0.118482	0.173908	A_24_P278299
ASB14	Homo sapiens ankyrin repeat and SOCS box containing 14 (ASB14), transcript variant 2, mRNA [NM_130387]	1.88055	9.06716	5.9226	5.40781	0.286297	2.85774	0.0761948	0	A_23_P155265
ASB16	Homo sapiens ankyrin repeat and SOCS box containing 16 (ASB16), mRNA [NM_080863]	25.5614	32.7059	119.547	251.626	0.0219769	0.679505	0.382342	1.51103	A_23_P118581
ASB16	Homo sapiens ankyrin repeat and SOCS box containing 16 (ASB16), mRNA [NM_080863]	6.64399	7.43685	122.81	270.254	-2.13018	-1.6656	0.21287	1.40575	A_24_P56837
ASB16-AS1	Homo sapiens ASB16 antisense RNA 1 (ASB16-AS1), transcript variant 1, long non-coding RNA [NR_049729]	79.0667	109.406	358.116	300.989	-0.493292	0.277197	-0.179186	-0.374912	A_32_P448360
ASB17	Homo sapiens ankyrin repeat and SOCS box containing 17 (ASB17), transcript variant 1, mRNA [NM_080868]	1.97047	2.04674	49.734	4.0452	0.461925	0.81866	3.25437	-0.310594	A_23_P344444
ASB2	Homo sapiens ankyrin repeat and SOCS box containing 2 (ASB2), transcript variant 2, mRNA [NM_016150]	31.3276	870.692	40.7552	25.5442	2.44096	7.53956	0.955331	0.336332	A_23_P205370
ASB3	Homo sapiens ankyrin repeat and SOCS box containing 3 (ASB3), transcript variant 1, mRNA [NM_016115]	888.401	825.874	4781.99	2722.5	-0.0307016	0.165955	0.53245	-0.225239	A_23_P56833
ASB4	Homo sapiens ankyrin repeat and SOCS box containing 4 (ASB4), transcript variant 1, mRNA [NM_016116]	2.00283	2.00176	6.5855	4.3835	0.0977688	0.39895	-0.0501528	-0.582372	A_23_P501319
ASB4	Homo sapiens ankyrin repeat and SOCS box containing 4 (ASB4), transcript variant 1, mRNA [NM_016116]	5.29546	7.15803	129.94	106.54	-1.9964	-1.25964	0.75537	0.52391	A_23_P157205
ASB4	Homo sapiens ankyrin repeat and SOCS box containing 4 (ASB4), transcript variant 1, mRNA [NM_016116]	5.26449	1.8976	13.4079	9.89161	0.835618	-0.334552	0.319159	-0.0646572	A_32_P130999
ASB5	Homo sapiens ankyrin repeat and SOCS box containing 5 (ASB5), mRNA [NM_080874]	265.725	59.2462	46.9932	30.2629	6.29488	4.43169	1.9303	1.35039	A_23_P144326
ASB5	Homo sapiens ankyrin repeat and SOCS box containing 5 (ASB5), mRNA [NM_080874]	5.03497	1.94435	8.50318	6.30174	1.10961	0.0388608	0.000452042	-0.376809	A_24_P97559
ASB6	Homo sapiens ankyrin repeat and SOCS box containing 6 (ASB6), transcript variant 1, mRNA [NM_017873]	1928.11	1840.62	4759	5353.35	0.386642	0.621598	-0.175061	0.0497122	A_23_P158059
ASB6	Homo sapiens ankyrin repeat and SOCS box containing 6 (ASB6), transcript variant 1, mRNA [NM_017873]	171.539	219.221	815.372	701.598	-0.224809	0.430985	0.158935	-0.00288963	A_32_P412313
ASB7	Homo sapiens ankyrin repeat and SOCS box containing 7 (ASB7), transcript variant 1, mRNA [NM_024708]	137.183	95.6402	513.511	414.945	-0.0332766	-0.251739	0.00584412	-0.246641	A_24_P155791
ASB7	Homo sapiens ankyrin repeat and SOCS box containing 7 (ASB7), transcript variant 1, mRNA [NM_024708]	205.982	130.688	524.552	435.313	0.516613	0.162165	0	-0.214042	A_23_P117743
ASB7	Homo sapiens ankyrin repeat and SOCS box containing 7 (ASB7), transcript variant 2, mRNA [NM_198243]	334.412	273.434	653.252	582.708	0.582644	0.594157	-0.316519	-0.426396	A_24_P920979
ASB8	Homo sapiens ankyrin repeat and SOCS box containing 8 (ASB8), mRNA [NM_024095]	58.7939	53.8659	352.151	442.363	-0.615411	-0.439758	0.101867	0.485897	A_24_P643587
ASB8	Homo sapiens ankyrin repeat and SOCS box containing 8 (ASB8), mRNA [NM_024095]	398.094	346.177	495.278	608.288	0.534183	0.63453	-1.01587	-0.664359	A_23_P22200
ASB9	Homo sapiens ankyrin repeat and SOCS box containing 9 (ASB9), transcript variant 1, mRNA [NM_001031739]	2.05632	16.6704	3.12755	74.1959	-5.45058	-2.12948	-6.71079	-2.08756	A_23_P125643
ASCC1	Homo sapiens activating signal cointegrator 1 complex subunit 1 (ASCC1), transcript variant 1, mRNA [NM_001198799]	569.814	461.835	2245.5	1756.55	-0.0209017	-0.0220709	0.0923967	-0.206906	A_23_P1280
ASCC2	Homo sapiens activating signal cointegrator 1 complex subunit 2 (ASCC2), transcript variant 1, mRNA [NM_032204]	310.037	272.03	2163.91	1787.61	-0.060699	0.0525718	0.877253	0.656636	A_23_P143643
ASCC3	Homo sapiens activating signal cointegrator 1 complex subunit 3 (ASCC3), transcript variant 2, mRNA [NM_022091]	64.3722	26.8213	429.012	497.176	-0.688743	-1.64986	0.182589	0.450318	A_23_P382654
ASCC3	Homo sapiens activating signal cointegrator 1 complex subunit 3 (ASCC3), transcript variant 2, mRNA [NM_022091]	152.512	64.7341	326.627	397.14	0.42946	-0.504915	-0.336993	0	A_23_P30972
ASCC3	Homo sapiens activating signal cointegrator 1 complex subunit 3 (ASCC3), transcript variant 1, mRNA [NM_006828]	3998.24	2529.08	4117.77	12172.1	0.839875	0.481071	-0.982805	0.63583	A_23_P19565
ASCL1	Homo sapiens achaete-scute family bHLH transcription factor 1 (ASCL1), mRNA [NM_004316]	1.97519	1.72765	13.722	8.57161	-0.652963	-0.544197	0.278295	-0.345572	A_23_P25305
ASCL2	Homo sapiens achaete-scute family bHLH transcription factor 2 (ASCL2), mRNA [NM_005170]	1.96126	1.75895	8.00097	17.4398	-0.688449	-0.543571	-0.525233	0.653898	A_23_P105088
ASCL2	Homo sapiens achaete-scute family bHLH transcription factor 2 (ASCL2), mRNA [NM_005170]	6.11389	2.46686	3.38879	106.622	0.481769	-0.525698	-2.23473	2.79585	A_32_P171061
ASCL3	Homo sapiens achaete-scute family bHLH transcription factor 3 (ASCL3), mRNA [NM_020646]	6.20809	3.75895	12.2139	5.3202	0.709797	0.287924	-0.179073	-1.32306	A_23_P2083
ASCL5	Homo sapiens achaete-scute family bHLH transcription factor 5 (ASCL5), mRNA [NM_001270601]	4.03599	2.6508	233.635	212.244	-2.82237	-3.12692	1.16765	1.0841	A_32_P122240
ASF1A	Homo sapiens anti-silencing function 1A histone chaperone (ASF1A), mRNA [NM_014034]	822.52	755.49	3295.09	2768.51	-0.469098	-0.28979	-0.332079	-0.528297	A_23_P19219
ASF1A	Homo sapiens anti-silencing function 1A histone chaperone (ASF1A), mRNA [NM_014034]	9.48729	10.0349	142.624	131.209	-1.46257	-1.07968	0.582325	0.516966	A_24_P112087
ASF1B	Homo sapiens anti-silencing function 1B histone chaperone (ASF1B), mRNA [NM_018154]	541.463	586.433	7366.54	476.817	-1.04957	-0.632521	0.851305	-3.04318	A_23_P119254
ASGR1	Homo sapiens asialoglycoprotein receptor 1 (ASGR1), transcript variant 1, mRNA [NM_001671]	559.471	453.374	776.682	498.816	1.42671	1.42529	0.034791	-0.549033	A_23_P118722
ASGR2	Homo sapiens asialoglycoprotein receptor 2 (ASGR2), transcript variant H2', mRNA [NM_080912]	4.77317	3.88459	22.0355	19.3623	-0.308377	-0.303617	0.0332561	-0.0983357	A_23_P130113
ASH1L	Homo sapiens ash1 (absent, small, or homeotic)-like (Drosophila) (ASH1L), mRNA [NM_018489]	14.3167	12.1124	45.996	45.3646	0.146314	0.207048	-0.0350499	0	A_23_P63083
ASH1L	Homo sapiens ash1 (absent, small, or homeotic)-like (Drosophila) (ASH1L), mRNA [NM_018489]	128.019	76.4631	237.538	267.286	0.0482974	-0.393278	-0.925081	-0.699863	A_24_P367666
ASH1L-AS1	Homo sapiens ASH1L antisense RNA 1 (ASH1L-AS1), long non-coding RNA [NR_027023]	470.112	334.648	696.894	413.053	0.588166	0.399754	-0.709075	-1.4087	A_24_P272225
ASH2L	Homo sapiens ash2 (absent, small, or homeotic)-like (Drosophila) (ASH2L), transcript variant 1, mRNA [NM_004674]	1901.77	1437.87	10611.3	6032.02	-0.437496	-0.538962	0.177506	-0.582388	A_23_P134827
ASIC1	Homo sapiens acid-sensing (proton-gated) ion channel 1 (ASIC1), transcript variant 1, mRNA [NM_020039]	570.619	115.294	4255.85	2723.32	0.546017	-1.45925	1.57969	0.990595	A_23_P204751
ASIC2	Homo sapiens acid-sensing (proton-gated) ion channel 2 (ASIC2), transcript variant MDEG2, mRNA [NM_183377]	27.1828	11.2372	62.8102	92.4851	0.539098	-0.433364	-0.117773	0.495439	A_32_P159612
ASIC3	Homo sapiens acid-sensing (proton-gated) ion channel 3 (ASIC3), transcript variant 3, mRNA [NM_020322]	1.96648	1.71673	52.3292	19.9065	-2.25959	-2.1536	0.609159	-0.730229	A_23_P93658
ASIC4	Homo sapiens acid-sensing (proton-gated) ion channel family member 4 (ASIC4), mRNA [NM_182847]	3.07611	2.01156	8.15456	16.8816	-0.480723	-0.791568	-0.9394	0.165365	A_24_P405375
ASIC5	Homo sapiens acid-sensing (proton-gated) ion channel family member 5 (ASIC5), mRNA [NM_017419]	2.78131	2.62702	3.84473	4.7256	0.718903	0.93851	-0.679156	-0.32655	A_23_P258433
ASIP	Homo sapiens agouti signaling protein (ASIP), mRNA [NM_001672]	1.85157	3.1714	11.1708	6.28419	-0.449523	0.628793	0.278203	-0.496735	A_23_P120629
ASL	Homo sapiens argininosuccinate lyase (ASL), transcript variant 1, mRNA [NM_001024943]	1510.73	848.988	2473.93	5096.63	0.282847	-0.246632	-0.870764	0.226964	A_23_P26223
ASMT	Homo sapiens acetylserotonin O-methyltransferase (ASMT), transcript variant 2, mRNA [NM_004043]	13.5828	1.79695	22.7293	34.1537	0.479931	-2.13629	-0.642476	0	A_23_P255535
ASMTL	Homo sapiens acetylserotonin O-methyltransferase-like (ASMTL), transcript variant 1, mRNA [NM_004192]	7179.77	1348.21	7310.6	5194.69	2.44998	0.339033	0.610853	0.172893	A_23_P159539
ASMTL	Homo sapiens acetylserotonin O-methyltransferase-like (ASMTL), transcript variant 1, mRNA [NM_004192]	2510.57	596.119	2699.34	1706.96	2.42239	0.649991	0.661804	0.0556173	A_23_P159544
ASMTL-AS1	Homo sapiens ASMTL antisense RNA 1 (ASMTL-AS1), transcript variant 2, long non-coding RNA [NR_026710]	70.5468	49.1318	217.089	180.519	0.265772	0.045794	0.0222282	-0.188916	A_23_P60793
ASNA1	Homo sapiens arsA arsenite transporter, ATP-binding, homolog 1 (bacterial) (ASNA1), mRNA [NM_004317]	1294.58	939.113	6136.63	7179.23	-0.44029	-0.601456	-0.0605021	0.22087	A_23_P27627
ASNS	Homo sapiens asparagine synthetase (glutamine-hydrolyzing) (ASNS), transcript variant 2, mRNA [NM_001673]	7458.77	4365.43	20097.4	23639.8	0.0855112	-0.385357	-0.349664	-0.0604658	A_23_P145694
ASNSD1	Homo sapiens asparagine synthetase domain containing 1 (ASNSD1), mRNA [NM_019048]	6032.98	4714.7	12228.6	12454.8	0.488692	0.434934	-0.357167	-0.275732	A_23_P91001
ASPA	Homo sapiens aspartoacylase (ASPA), transcript variant 1, mRNA [NM_000049]	38.2584	7.25695	3.64739	93.0908	4.36929	2.27289	-0.88673	3.84196	A_24_P373475
ASPA	aspartoacylase [Source:HGNC Symbol;Acc:756] [ENST00000263080]	1.96834	1.71713	3.21107	10.6101	0.142727	0.247694	-1.01637	0.762934	A_24_P602013
ASPA	Homo sapiens aspartoacylase (ASPA), transcript variant 1, mRNA [NM_000049]	195.664	35.8042	25.1234	395.868	5.83652	3.68829	1.01007	5.04297	A_23_P164436
ASPDH	Homo sapiens aspartate dehydrogenase domain containing (ASPDH), transcript variant 2, mRNA [NM_001024656]	2.00033	3.6117	13.7512	11.7119	-1.14821	0.00617838	-0.232144	-0.40873	A_24_P690811
ASPG	Homo sapiens asparaginase (ASPG), mRNA [NM_001080464]	33.4704	6.45966	75.588	20.4057	2.07778	0.00636911	1.38787	-0.446324	A_23_P76743
ASPH	Homo sapiens aspartate beta-hydroxylase (ASPH), transcript variant 4, mRNA [NM_032467]	4146.01	1715.81	3293.37	5958.11	1.28705	0.316164	-0.910279	0	A_24_P295245
ASPH	Homo sapiens aspartate beta-hydroxylase (ASPH), transcript variant 1, mRNA [NM_004318]	644.668	193.826	714.879	1025.32	0.71711	-0.714735	-0.998923	-0.423635	A_23_P216094
ASPH	Homo sapiens aspartate beta-hydroxylase (ASPH), transcript variant 3, mRNA [NM_032466]	2966.1	1724.12	6932.42	15699.4	0.0899	-0.390861	-0.550484	0.683785	A_24_P18105
ASPHD1	Homo sapiens aspartate beta-hydroxylase domain containing 1 (ASPHD1), mRNA [NM_181718]	5589.23	2278.21	13789.3	12756	0.556791	-0.436012	-0.00556374	-0.0629387	A_23_P170667
ASPHD2	Homo sapiens aspartate beta-hydroxylase domain containing 2 (ASPHD2), mRNA [NM_020437]	44.0207	25.2306	641.87	455.509	-0.488802	-0.989861	1.51205	1.07224	A_24_P245815
ASPHD2	Homo sapiens aspartate beta-hydroxylase domain containing 2 (ASPHD2), mRNA [NM_020437]	56.7144	48.7873	644.359	443.919	-0.304448	-0.219709	1.33645	0.853876	A_23_P91640
ASPM	Homo sapiens asp (abnormal spindle) homolog, microcephaly associated (Drosophila) (ASPM), transcript variant 1, mRNA [NM_018136]	2391.37	3152.74	20127.9	1901.74	-0.840444	-0.139727	0.36767	-2.98115	A_23_P52017
ASPM	Homo sapiens asp (abnormal spindle) homolog, microcephaly associated (Drosophila) (ASPM), transcript variant 1, mRNA [NM_018136]	133.641	88.3834	1116.9	87.1128	-0.344944	-0.639511	0.852947	-2.77253	A_24_P911179
ASPN	Homo sapiens asporin (ASPN), transcript variant 1, mRNA [NM_017680]	15.6048	10.9011	3.08153	188.263	3.17889	2.96331	-1.02656	4.96139	A_23_P216429
ASPRV1	Homo sapiens aspartic peptidase, retroviral-like 1 (ASPRV1), mRNA [NM_152792]	341.451	398.076	322.951	457.558	1.36112	1.88444	-0.584417	-0.0267868	A_23_P417383
ASPSCR1	Homo sapiens alveolar soft part sarcoma chromosome region, candidate 1 (ASPSCR1), transcript variant 1, mRNA [NM_024083]	180.01	224.195	956.01	539.066	-0.543772	0.0748496	0	-0.771572	A_23_P32320
ASRGL1	Homo sapiens asparaginase like 1 (ASRGL1), transcript variant 1, mRNA [NM_001083926]	62.7187	35.505	5393.25	438.076	-2.90632	-3.42525	1.65461	-1.9123	A_23_P203391
ASRGL1	Homo sapiens asparaginase like 1 (ASRGL1), transcript variant 1, mRNA [NM_001083926]	111.117	66.461	7703.65	142.618	-2.5449	-2.98446	1.70531	-3.99501	A_23_P379864
ASRGL1	Homo sapiens asparaginase like 1 (ASRGL1), transcript variant 2, mRNA [NM_025080]	40.1531	21.1191	6913	152.712	-3.60104	-4.22605	1.96144	-3.48399	A_23_P1936
ASRGL1	Homo sapiens asparaginase like 1 (ASRGL1), transcript variant 2, mRNA [NM_025080]	45.3781	23.6617	5207.31	93.1159	-2.83163	-3.46912	2.1456	-3.60478	A_23_P203392
ASS1	Homo sapiens argininosuccinate synthase 1 (ASS1), transcript variant 1, mRNA [NM_000050]	386.396	79.9877	22.8196	2469.86	-0.213515	-2.1838	-6.16043	0.652573	A_23_P31921
ASTE1	Homo sapiens asteroid homolog 1 (Drosophila) (ASTE1), transcript variant 2, mRNA [NM_014065]	69.8233	70.4464	909.56	547.208	-1.48695	-1.17218	0.351264	-0.326825	A_23_P121141
ASTL	Homo sapiens astacin-like metallo-endopeptidase (M12 family) (ASTL), mRNA [NM_001002036]	12.6859	12.7862	124.703	139.359	-1.22378	-0.910478	0.208229	0.423539	A_23_P102439
ASTN1	Homo sapiens astrotactin 1 (ASTN1), transcript variant 1, mRNA [NM_004319]	1.98681	4.12729	16.7253	143.274	0.127474	1.48416	1.3358	4.48947	A_23_P301021
ASTN1	Homo sapiens astrotactin 1 (ASTN1), transcript variant 1, mRNA [NM_004319]	3.25035	5.80662	5.14695	3.95209	0.76391	1.90296	-0.438142	-0.764254	A_32_P22383
ASTN2	Homo sapiens astrotactin 2 (ASTN2), transcript variant 4, mRNA [NM_198188]	113.787	95.4719	3289.29	3447.22	-1.07558	-1.02682	1.91261	2.03526	A_24_P83738
ASTN2	Homo sapiens astrotactin 2 (ASTN2), transcript variant 1, mRNA [NM_014010]	617.974	484.068	1155.67	1046.45	0.783302	0.732913	-0.178763	-0.267005	A_23_P357936
ASUN	Homo sapiens asunder spermatogenesis regulator (ASUN), mRNA [NM_018164]	432.816	431.717	2147.97	2948.85	-0.445972	-0.147694	0	0.512166	A_23_P36464
ASXL1	Homo sapiens additional sex combs like 1 (Drosophila) (ASXL1), transcript variant 1, mRNA [NM_015338]	605.038	746.221	8447.47	2064.23	-0.787724	-0.1832	1.15052	-0.827405	A_24_P19337
ASXL1	Homo sapiens additional sex combs like 1 (Drosophila) (ASXL1), transcript variant 1, mRNA [NM_015338]	1298.66	1028.24	10825.5	2582.14	-0.201225	-0.236123	0.99293	-1.01987	A_32_P41021
ASXL2	additional sex combs like 2 (Drosophila) [Source:HGNC Symbol;Acc:23805] [ENST00000336112]	362.161	375.31	2281.6	1586.08	-0.443808	-0.0904064	0.346362	-0.123231	A_24_P359771
ASXL2	Homo sapiens additional sex combs like 2 (Drosophila) (ASXL2), mRNA [NM_018263]	1609.04	1649.69	5989.59	3502.47	0.388502	0.726447	0.419584	-0.299509	A_23_P210300
ASXL3	additional sex combs like 3 (Drosophila) [Source:HGNC Symbol;Acc:29357] [ENST00000269197]	7.26298	2.71458	3.61679	7.73096	0.966615	-0.151272	-1.90442	-0.753485	A_32_P5057
ASXL3	Homo sapiens additional sex combs like 3 (Drosophila) (ASXL3), mRNA [NM_030632]	2.76465	1.70212	3.09785	3.90288	0.700586	0.302761	-1.00042	-0.61216	A_32_P389544
ASXL3	Homo sapiens additional sex combs like 3 (Drosophila) (ASXL3), mRNA [NM_030632]	1.96354	1.75553	3.3164	3.83974	-0.245254	-0.104858	-1.35427	-1.08789	A_32_P386298
ASXL3	Homo sapiens additional sex combs like 3 (Drosophila) (ASXL3), mRNA [NM_030632]	2.10623	4.57807	3.12939	3.91399	0.450667	1.87269	-0.843297	-0.465546	A_23_P381746
ASZ1	Homo sapiens ankyrin repeat, SAM and basic leucine zipper domain containing 1 (ASZ1), transcript variant 1, mRNA [NM_130768]	3.28769	3.89084	51.4188	3.88589	0.95241	1.49736	3.05438	-0.616607	A_23_P71213
ATAD1	Homo sapiens ATPase family, AAA domain containing 1 (ATAD1), mRNA [NM_032810]	1931.69	2074.35	9013.05	8997.8	-0.409519	-0.00478077	-0.0525475	0	A_23_P75288
ATAD1	Homo sapiens ATPase family, AAA domain containing 1 (ATAD1), mRNA [NM_032810]	337.409	281.706	1130.1	1692.19	-0.174689	-0.13305	-0.295989	0.341442	A_24_P329777
ATAD2	Homo sapiens ATPase family, AAA domain containing 2 (ATAD2), mRNA [NM_014109]	507.938	314.461	7042.03	667.279	-0.554105	-0.943931	1.37399	-1.97065	A_23_P216068
ATAD2	Homo sapiens ATPase family, AAA domain containing 2 (ATAD2), mRNA [NM_014109]	12.081	8.76774	548.374	51.2242	-1.89894	-2.05946	1.74023	-1.62505	A_24_P59596
ATAD2B	Homo sapiens ATPase family, AAA domain containing 2B (ATAD2B), transcript variant 1, mRNA [NM_017552]	112.814	143.035	973.515	306.762	-0.706152	-0.0617862	0.537927	-1.07317	A_32_P191004
ATAD3A	Homo sapiens ATPase family, AAA domain containing 3A (ATAD3A), transcript variant 1, mRNA [NM_018188]	2198.33	1898.37	8662.41	3521.01	0.0896177	0.17992	0.202803	-1.04098	A_23_P201357
ATAD3B	Homo sapiens ATPase family, AAA domain containing 3B (ATAD3B), mRNA [NM_031921]	415.058	315.456	2806.1	654.933	0.0939255	0	0.985929	-1.05823	A_23_P74688
ATAD3B	Homo sapiens TOB3 mRNA, complete cds. [AF343078]	288.011	264.588	4208.82	919.225	-0.450961	-0.271392	1.55308	-0.586853	A_32_P353677
ATAD3B	ATPase family, AAA domain containing 3B [Source:HGNC Symbol;Acc:24007] [ENST00000472194]	2.13393	5.02561	25.9165	7.29128	-1.2649	0.27283	0.472208	-1.30243	A_23_P302750
ATAD3C	Homo sapiens ATPase family, AAA domain containing 3C (ATAD3C), mRNA [NM_001039211]	2219.68	979.233	4021.07	2782.52	1.60175	0.72307	0.593803	0.117608	A_23_P318486
ATAD5	Homo sapiens ATPase family, AAA domain containing 5 (ATAD5), mRNA [NM_024857]	28.7667	24.7827	305.57	34.4015	-1.55426	-1.46738	-0.0104084	-3.10637	A_24_P113144
ATAD5	Homo sapiens ATPase family, AAA domain containing 5 (ATAD5), mRNA [NM_024857]	38.2287	35.7021	205.826	49.0618	-0.782022	-0.578727	-0.218502	-2.23227	A_23_P255750
ATAT1	Homo sapiens alpha tubulin acetyltransferase 1 (ATAT1), transcript variant 2, mRNA [NM_024909]	11.2787	16.442	39.1871	52.717	-0.236742	0.608984	-0.305146	0.177734	A_23_P70509
ATAT1	alpha tubulin acetyltransferase 1 [Source:HGNC Symbol;Acc:21186] [ENST00000464565]	8.65817	18.8543	14.1362	36.3863	-0.530233	0.894469	-1.68816	-0.269161	A_24_P290130
ATCAY	Homo sapiens ataxia, cerebellar, Cayman type (ATCAY), mRNA [NM_033064]	8.29207	4.45326	36.0521	34.6619	1.63721	1.04229	1.89232	1.89057	A_23_P101671
ATCAY	Homo sapiens ataxia, cerebellar, Cayman type (ATCAY), mRNA [NM_033064]	1.98899	1.76309	9.8216	4.15921	-0.128016	0	0.310729	-0.873929	A_24_P40094
ATCAY	Homo sapiens ataxia, cerebellar, Cayman type (ATCAY), mRNA [NM_033064]	9.28797	6.09373	170.619	125.842	-0.768345	-1.07444	1.56575	1.18157	A_23_P433063
ATE1	Homo sapiens arginyltransferase 1 (ATE1), transcript variant 5, mRNA [NM_001288736]	18.3431	18.6711	321.15	299.144	-1.59701	-1.26949	0.667748	0.62033	A_32_P170759
ATE1	Homo sapiens arginyltransferase 1 (ATE1), transcript variant 1, mRNA [NM_001001976]	37.2677	19.5425	181.958	203.987	-0.299928	-0.929288	0.122507	0.342367	A_23_P138574
ATF1	Homo sapiens activating transcription factor 1 (ATF1), mRNA [NM_005171]	278.641	208.683	867.685	763.612	0	-0.115147	-0.226414	-0.355756	A_23_P105646
ATF2	Homo sapiens activating transcription factor 2 (ATF2), transcript variant 2, mRNA [NM_001256090]	1002.92	703.525	4160	4692.7	-0.309499	-0.519083	-0.122297	0.106529	A_23_P209879
ATF2	Homo sapiens activating transcription factor 2 (ATF2), transcript variant 1, mRNA [NM_001880]	103.137	90.6989	494.463	429.278	-0.564153	-0.447608	-0.168028	-0.316985	A_24_P246467
ATF2	Homo sapiens activating transcription factor 2 (ATF2), transcript variant 1, mRNA [NM_001880]	38.7852	24.0234	202.948	146.081	-0.324476	-0.713597	0.197881	-0.221477	A_24_P128145
ATF3	Homo sapiens activating transcription factor 3 (ATF3), transcript variant 4, mRNA [NM_001040619]	6.92052	27.9737	139.726	132.325	-1.71096	0.60611	0.75944	0.735919	A_24_P33895
ATF3	Homo sapiens activating transcription factor 3 (ATF3), transcript variant 4, mRNA [NM_001040619]	1749.2	866.448	2428.35	2288.44	0.89411	0.182549	-0.497781	-0.528404	A_23_P34915
ATF4	Homo sapiens activating transcription factor 4 (ATF4), transcript variant 1, mRNA [NM_001675]	6067.05	5699.18	11095.3	17344.7	0.189113	0.400819	-0.805182	-0.105643	A_23_P120941
ATF4	Homo sapiens activating transcription factor 4 (ATF4), transcript variant 1, mRNA [NM_001675]	32625.8	29891.6	77336.9	124775	-0.168094	0.00758171	-0.788128	-0.0430412	A_23_P120933
ATF5	Homo sapiens activating transcription factor 5 (ATF5), transcript variant 1, mRNA [NM_012068]	1076.93	301.798	2787.71	5127.76	0.481541	-1.05179	-0.0114841	0.922754	A_23_P119337
ATF6	Homo sapiens activating transcription factor 6 (ATF6), mRNA [NM_007348]	3681.41	2742.16	4526.81	7310.35	0.249566	0.126565	-1.31738	-0.570938	A_23_P62907
ATF6	Homo sapiens activating transcription factor 6 (ATF6), mRNA [NM_007348]	88.5445	99.996	156.868	283.743	0.130074	0.607488	-0.910026	0	A_24_P453259
ATF6B	Homo sapiens activating transcription factor 6 beta (ATF6B), transcript variant 1, mRNA [NM_004381]	50.8509	66.4804	152.469	185.352	-0.0557408	0.632863	-0.336749	0	A_23_P59163
ATF6B	Homo sapiens activating transcription factor 6 beta (ATF6B), transcript variant 1, mRNA [NM_004381]	68.2822	84.8034	124.582	122.758	-0.208565	0.405995	-1.20623	-1.17252	A_24_P419109
ATF7	Homo sapiens activating transcription factor 7 (ATF7), transcript variant 4, mRNA [NM_001206682]	60.6305	47.2028	400.737	640.843	-1.04268	-1.1019	-0.183316	0.548991	A_24_P922475
ATF7	Homo sapiens activating transcription factor 7 (ATF7), transcript variant 2, mRNA [NM_006856]	2.23651	1.90875	3.39477	4.22649	0.329065	0.40239	-0.934048	-0.562911	A_23_P361495
ATF7IP	Homo sapiens activating transcription factor 7 interacting protein (ATF7IP), transcript variant 2, mRNA [NM_018179]	15.4999	14.3696	81.8482	63.8218	-0.731003	-0.538294	-0.195492	-0.499401	A_24_P923757
ATF7IP	Homo sapiens cDNA FLJ10139 fis, clone HEMBA1003175. [AK001001]	2.06953	1.78766	3.528	8.09045	-0.0907154	0	-1.18635	0.0660152	A_23_P48278
ATF7IP	Homo sapiens activating transcription factor 7 interacting protein (ATF7IP), transcript variant 2, mRNA [NM_018179]	688.448	450.854	2209.16	2781.41	-0.227521	-0.53626	-0.410616	-0.0233116	A_23_P112950
ATF7IP2	Homo sapiens activating transcription factor 7 interacting protein 2 (ATF7IP2), transcript variant 1, mRNA [NM_024997]	1.86644	1.68693	28.7741	3.89456	0.0839615	0.240018	2.1652	-0.66505	A_24_P341987
ATF7IP2	activating transcription factor 7 interacting protein 2 [Source:HGNC Symbol;Acc:20397] [ENST00000570163]	9.35833	12.5755	1087.98	70.424	-3.11618	-2.38794	1.87984	-2.01462	A_24_P813520
ATF7IP2	Homo sapiens activating transcription factor 7 interacting protein 2 (ATF7IP2), transcript variant 1, mRNA [NM_024997]	8.64327	19.3606	3647.49	339.583	-5.1122	-3.64678	1.74373	-1.62635	A_23_P129466
ATG10	Homo sapiens autophagy related 10 (ATG10), transcript variant 2, mRNA [NM_031482]	131.209	73.6569	96.6303	248.427	0.724909	0.193882	-1.58159	-0.164321	A_24_P370471
ATG10	Homo sapiens autophagy related 10 (ATG10), transcript variant 2, mRNA [NM_031482]	208.927	201.095	154.83	414.776	0.359646	0.606472	-1.93785	-0.461205	A_23_P92824
ATG101	Homo sapiens autophagy related 101 (ATG101), transcript variant 1, mRNA [NM_021934]	2026.99	1707.58	4796.01	7920.78	0.0531597	0.10772	-0.56952	0.209278	A_23_P116840
ATG12	Homo sapiens autophagy related 12 (ATG12), transcript variant 1, mRNA [NM_004707]	2194.03	1211.33	5080.48	4539.08	-0.0397062	-0.594755	-0.693504	-0.801079	A_23_P18901
ATG12	Homo sapiens autophagy related 12 (ATG12), transcript variant 1, mRNA [NM_004707]	3702.3	2335.41	9536.74	8344.56	-0.0423517	-0.40515	-0.542457	-0.680126	A_23_P20970
ATG12	Homo sapiens autophagy related 12 (ATG12), transcript variant 1, mRNA [NM_004707]	1337.22	1405.87	1390.04	2479.6	1.24488	1.61906	-0.564402	0.325569	A_24_P680857
ATG13	Homo sapiens autophagy related 13 (ATG13), transcript variant 2, mRNA [NM_014741]	726.246	755.801	1576.84	1695.34	0.587144	0.946639	-0.159524	0	A_23_P95292
ATG13	Homo sapiens autophagy related 13 (ATG13), transcript variant 2, mRNA [NM_014741]	632.335	1128.05	2074.72	2446.5	0	1.13702	-0.151017	0.141771	A_24_P295601
ATG14	Homo sapiens autophagy related 14 (ATG14), mRNA [NM_014924]	12.2916	8.78373	174.516	229.714	-1.4198	-1.60262	0.542641	0.994109	A_23_P309989
ATG16L1	autophagy related 16-like 1 (S. cerevisiae) [Source:HGNC Symbol;Acc:21498] [ENST00000472242]	2.32101	2.69208	34.3604	23.9542	-2.02187	-1.50596	0.000872135	-0.464603	A_23_P315378
ATG16L1	Homo sapiens autophagy related 16-like 1 (S. cerevisiae) (ATG16L1), transcript variant 1, mRNA [NM_030803]	555.037	678.623	3685.19	3463.07	-1.07297	-0.480995	-0.207063	-0.24176	A_32_P113508
ATG16L2	Homo sapiens autophagy related 16-like 2 (S. cerevisiae) (ATG16L2), mRNA [NM_033388]	603.091	1311.01	1725.84	2137.13	-0.0746355	1.34754	-0.422956	-0.0595942	A_23_P36305
ATG2A	Homo sapiens autophagy related 2A (ATG2A), mRNA [NM_015104]	285.591	280.331	1254.53	885.161	-0.413101	-0.137974	-0.143158	-0.591299	A_23_P361820
ATG2B	Homo sapiens autophagy related 2B (ATG2B), mRNA [NM_018036]	649.904	393.697	1634.26	1850.51	0.596193	0.174998	0.0613518	0.295633	A_23_P88163
ATG2B	Homo sapiens autophagy related 2B (ATG2B), mRNA [NM_018036]	4.05435	4.109	20.0482	20.1768	0.189744	0.511005	0.630498	0.69471	A_24_P332941
ATG3	Homo sapiens autophagy related 3 (ATG3), transcript variant 2, mRNA [NM_001278712]	10.4508	3.53427	94.5343	48.721	-0.762674	-2.02485	0.549377	-0.351927	A_24_P196382
ATG3	Homo sapiens autophagy related 3 (ATG3), transcript variant 1, mRNA [NM_022488]	1693.57	974.546	7602.42	9564.08	-0.393838	-0.88916	-0.0926275	0.29353	A_23_P212706
ATG4A	Homo sapiens autophagy related 4A, cysteine peptidase (ATG4A), transcript variant 1, mRNA [NM_052936]	783.95	627.088	1222.39	2625.66	0.475712	0.455565	-0.748593	0.409372	A_23_P217367
ATG4B	Homo sapiens autophagy related 4B, cysteine peptidase (ATG4B), transcript variant 2, mRNA [NM_178326]	1601.96	1273.74	4750.94	5748.87	0.18526	0.156435	-0.111545	0.21851	A_24_P182764
ATG4B	Homo sapiens autophagy related 4B, cysteine peptidase (ATG4B), transcript variant 2, mRNA [NM_178326]	671.044	634.254	4197.47	2237.06	-0.1216	0.098999	0.658263	-0.194661	A_23_P9903
ATG4C	Homo sapiens autophagy related 4C, cysteine peptidase (ATG4C), transcript variant 1, mRNA [NM_032852]	360.727	255.441	1056.85	873.608	0.540872	0.344899	0.226487	0.00676346	A_23_P502488
ATG4C	Homo sapiens autophagy related 4C, cysteine peptidase (ATG4C), transcript variant 1, mRNA [NM_032852]	102.472	86.5581	446.476	642.117	0.0692058	0.127669	0.327387	0.906631	A_24_P182539
ATG4D	Homo sapiens autophagy related 4D, cysteine peptidase (ATG4D), transcript variant 1, mRNA [NM_032885]	154.685	97.4134	1612.88	358.496	-0.456957	-0.822147	1.0601	-1.05452	A_23_P101342
ATG5	Homo sapiens autophagy related 5 (ATG5), transcript variant 1, mRNA [NM_004849]	2223.32	1577.02	3245.45	4899.23	0.526071	0.332497	-0.793407	-0.144279	A_23_P111381
ATG5	Homo sapiens autophagy related 5 (ATG5), transcript variant 1, mRNA [NM_004849]	671.073	435.957	668.562	1233.47	1.04765	0.727315	-0.822931	0.115653	A_24_P175059
ATG7	Homo sapiens autophagy related 7 (ATG7), transcript variant 1, mRNA [NM_006395]	1129.54	591.386	1332.39	1485.7	1.02963	0.398016	-0.59726	-0.385149	A_23_P143987
ATG7	Homo sapiens autophagy related 7 (ATG7), transcript variant 1, mRNA [NM_006395]	129.694	87.2455	440.717	608.841	-0.483605	-0.753617	-0.584041	-0.0628381	A_24_P944827
ATG9A	Homo sapiens autophagy related 9A (ATG9A), transcript variant 1, mRNA [NM_001077198]	1926.47	1760.07	5344.79	4967.33	0.610575	0.78219	0.217571	0.166899	A_23_P165450
ATG9B	Homo sapiens autophagy related 9B (ATG9B), transcript variant 1, mRNA [NM_173681]	4.37985	7.18739	3.40006	27.9955	0.689345	1.70588	-1.54115	1.5554	A_32_P154053
ATG9B	Homo sapiens autophagy related 9B (ATG9B), transcript variant 1, mRNA [NM_173681]	3.38978	1.80642	7.59883	9.72156	0.522914	-0.0831985	-0.177678	0.232723	A_32_P379379
ATHL1	Homo sapiens ATH1, acid trehalase-like 1 (yeast) (ATHL1), mRNA [NM_025092]	233.437	374.301	2086.23	318.118	0.0934682	1.07658	1.38808	-1.27019	A_23_P98686
ATIC	Homo sapiens 5-aminoimidazole-4-carboxamide ribonucleotide formyltransferase/IMP cyclohydrolase (ATIC), mRNA [NM_004044]	2321.45	1478.33	11098.4	11148.8	-0.715048	-1.06416	-0.322972	-0.261447	A_23_P68087
ATL1	Homo sapiens atlastin GTPase 1 (ATL1), transcript variant 2, mRNA [NM_181598]	957.521	680.046	1423.67	2608.74	3.09776	2.90604	1.80482	2.73356	A_23_P88351
ATL2	Homo sapiens atlastin GTPase 2 (ATL2), transcript variant 1, mRNA [NM_022374]	1416.45	817.001	7558.66	3184.93	-0.172793	-0.664713	0.377884	-0.813995	A_23_P209619
ATL2	Homo sapiens atlastin GTPase 2 (ATL2), transcript variant 1, mRNA [NM_022374]	6.542	1.96306	128.92	34.7117	-1.29353	-2.72821	1.14189	-0.696092	A_23_P415015
ATL3	Homo sapiens atlastin GTPase 3 (ATL3), transcript variant 1, mRNA [NM_015459]	1511.58	724.258	5982.19	2707.74	0	-0.759536	0.119439	-0.969153	A_23_P105028
ATM	Homo sapiens ataxia telangiectasia mutated (ATM), mRNA [NM_000051]	45.4898	35.6431	83.7818	142.226	0.292041	0.242067	-0.692043	0.126429	A_23_P35916
ATM	ataxia telangiectasia mutated [Source:HGNC Symbol;Acc:795] [ENST00000533733]	3.9477	5.3661	3.10676	3.92211	1.3476	2.09241	-0.863178	-0.471968	A_24_P103944
ATM	Homo sapiens ataxia telangiectasia mutated (ATM), mRNA [NM_000051]	27.2091	14.422	37.4679	54.3041	0.877772	0.263894	-0.525842	0.0645542	A_23_P374812
ATMIN	Homo sapiens ATM interactor (ATMIN), mRNA [NM_015251]	50.7505	76.7269	249.581	328.797	-0.496806	0.401449	-0.0639682	0.388708	A_23_P100133
ATMIN	Homo sapiens ATM interactor (ATMIN), mRNA [NM_015251]	24.7626	16.3984	799.049	1322.3	-1.74814	-2.0408	1.39873	2.18041	A_24_P176493
ATMIN	Homo sapiens ATM interactor (ATMIN), mRNA [NM_015251]	740.937	571.931	2873.82	3066.06	-0.545555	-0.617117	-0.455187	-0.306777	A_24_P167984
ATN1	Homo sapiens atrophin 1 (ATN1), transcript variant 1, mRNA [NM_001007026]	163.843	153.627	2623.12	2721.91	-0.599782	-0.390712	1.53594	1.64427	A_24_P24244
ATN1	Homo sapiens atrophin 1 (ATN1), transcript variant 1, mRNA [NM_001007026]	1012.51	630.745	2283.53	1409	1.21716	0.836302	0.525314	-0.116284	A_23_P13885
ATOH1	Homo sapiens atonal homolog 1 (Drosophila) (ATOH1), mRNA [NM_005172]	5.38613	1.92278	3.49243	4.02224	1.4932	0.309096	-0.996992	-0.738235	A_23_P332246
ATOH7	Homo sapiens atonal homolog 7 (Drosophila) (ATOH7), mRNA [NM_145178]	5.72294	4.4152	29.1969	26.0522	-0.563	-0.63533	-0.0771914	-0.186609	A_23_P378514
ATOH7	Homo sapiens atonal homolog 7 (Drosophila) (ATOH7), mRNA [NM_145178]	9.2311	2.71306	26.3449	3.93383	1.41646	-0.0481729	1.06423	-1.62429	A_32_P78295
ATOH8	Homo sapiens atonal homolog 8 (Drosophila) (ATOH8), mRNA [NM_032827]	812.241	531.375	249.712	343.321	2.15071	1.84049	-1.4161	-0.901819	A_32_P38093
ATOH8	Homo sapiens atonal homolog 8 (Drosophila) (ATOH8), mRNA [NM_032827]	1456.49	940.355	679.067	1475.12	2.33407	2.00479	-0.63198	0.542218	A_23_P142878
ATOX1	Homo sapiens antioxidant 1 copper chaperone (ATOX1), mRNA [NM_004045]	9395.47	4726.36	8057.96	14448	1.14486	0.455574	-0.941867	-0.0444956	A_23_P144877
ATP10A	ATPase, class V, type 10A [Source:HGNC Symbol;Acc:13542] [ENST00000555815]	2.11422	7.42759	3.48688	4.11898	0.0865998	2.20132	-1.05677	-0.761425	A_24_P390395
ATP10A	Homo sapiens ATPase, class V, type 10A (ATP10A), mRNA [NM_024490]	29.8239	172.085	43.2018	93.97	0.378338	3.20887	-0.952215	0.223885	A_23_P65659
ATP10A	Homo sapiens ATPase, class V, type 10A (ATP10A), mRNA [NM_024490]	482.55	2052.64	343.639	1451.63	0.843556	3.23423	-1.51141	0.622295	A_24_P215765
ATP10B	Homo sapiens ATPase, class V, type 10B (ATP10B), mRNA [NM_025153]	2.04331	5.01242	58.9446	4.21143	0.0554304	1.65198	3.04063	-0.711353	A_23_P311901
ATP10B	ATPase, class V, type 10B [Source:HGNC Symbol;Acc:13543] [ENST00000326831]	21273.6	4833.32	12790.7	15108.2	2.59914	0.763111	0	0.29522	A_24_P403016
ATP10D	Homo sapiens ATPase, class V, type 10D (ATP10D), mRNA [NM_020453]	66.2757	13.0734	53.8528	158.893	0.680067	-1.35983	-1.48457	0.131386	A_24_P919399
ATP10D	Homo sapiens ATPase, class V, type 10D (ATP10D), mRNA [NM_020453]	749.45	323.27	272.298	2736.19	0.762794	-0.148353	-2.56303	0.820871	A_23_P170280
ATP11A	Homo sapiens ATPase, class VI, type 11A (ATP11A), transcript variant 1, mRNA [NM_015205]	436.692	226.564	5136.22	1852.92	-0.462246	-1.107	1.22859	-0.187322	A_24_P161973
ATP11A	Homo sapiens ATPase, class VI, type 11A (ATP11A), transcript variant 1, mRNA [NM_015205]	1.97267	1.75255	39.756	19.3939	-2.12626	-1.99501	0.341515	-0.639064	A_24_P59403
ATP11A	Homo sapiens ATPase, class VI, type 11A (ATP11A), transcript variant 2, mRNA [NM_032189]	1.90006	1.70725	55.4805	20.5105	-2.19631	-2.04873	0.806382	-0.574246	A_24_P143599
ATP11B	Homo sapiens ATPase, class VI, type 11B (ATP11B), mRNA [NM_014616]	522.918	395.736	3193.22	1466.99	0.420307	0.320207	1.16549	0.0983238	A_23_P212522
ATP11B	Homo sapiens ATPase, class VI, type 11B (ATP11B), mRNA [NM_014616]	610.34	284.416	1277.33	991.161	1.20021	0.400542	0.400476	0.0895281	A_24_P157415
ATP11B	Homo sapiens ATPase, class VI, type 11B (ATP11B), mRNA [NM_014616]	18.4077	5.5762	76.5961	68.058	0.444678	-0.976331	0.636462	0.520946	A_24_P340428
ATP11B	Homo sapiens ATPase, class VI, type 11B (ATP11B), mRNA [NM_014616]	424.239	252.84	2651.82	1276.78	0.317054	-0.127651	1.09591	0.0964317	A_24_P111737
ATP11B	Homo sapiens ATPase, class VI, type 11B (ATP11B), mRNA [NM_014616]	5.29976	5.86614	20.7387	15.3864	0.887582	1.33601	0.990732	0.615057	A_24_P152310
[truncated: 29,734 more rows]

## Sheet: Supplementary Table S3
Supplementary Table S3: Identified proteins in the nuclear (A), cytoplasmic (B), and supernatant fraction (C)
A. Nuclear Fraction
Majority protein IDs	Protein names	Gene names	LFQ intensity Meso109F_NE1	LFQ intensity Meso109F_NE2	LFQ intensity Meso109F_NE3	LFQ intensity Meso109F-hTERT_NE1	LFQ intensity Meso109F-hTERT_NE2	LFQ intensity Meso109F-hTERT_NE3	LFQ intensity Meso125F_NE1	LFQ intensity Meso125F_NE2	LFQ intensity Meso125F_NE3	LFQ intensity Meso125F-hTERT_NE1	LFQ intensity Meso125F-hTERT_NE2	LFQ intensity Meso125F-hTERT_NE3	LFQ intensity Met5A_NE1	LFQ intensity Met5A_NE2	LFQ intensity Met5A_NE3	LFQ intensity MRC-5_NE1	LFQ intensity MRC-5_NE2	LFQ intensity MRC-5_NE3	LFQ intensity NP2-hTERT_NE1	LFQ intensity NP2-hTERT_NE2	LFQ intensity NP2-hTERT_NE3	LFQ intensity NP2_NE1	LFQ intensity NP2_NE2	LFQ intensity NP2_NE3	LFQ intensity Wi38_NE1	LFQ intensity Wi38_NE2	LFQ intensity Wi38_NE3	Peptides	Unique peptides	Sequence coverage [%]
A0AVT1;A0AVT1-2	Ubiquitin-like modifier-activating enzyme 6	UBA6	12.9109	13.7136	11.1263	12.1791	7.14863	13.1346	9.02887	12.1058	12.8046	11.0292	12.0627	12.0223	16.4635	16.4369	16.3936	13.8012	13.2132	12.3884	15.6173	10.9446	15.9846	12.8946	13.1434	13.2681	10.8046	10.7964	11.696	35	35	48.8
A0FGR8-2;A0FGR8;A0FGR8-6;A0FGR8-4	Extended synaptotagmin-2	ESYT2	17.8633	18.0286	17.7077	17.9958	17.0621	17.7166	17.8241	17.7932	17.7113	18.1602	18.7868	19.0453	17.7021	18.3539	18.0132	17.2049	16.6804	17.923	17.7786	12.6319	17.2451	18.7259	17.8595	18.9906	18.8942	18.4144	18.9512	25	25	41.9
A0JLT2;A0JLT2-2	Mediator of RNA polymerase II transcription subunit 19	MED19	13.1327	12.0087	12.3255	12.694	11.5141	11.2393	13.1817	11.7197	12.8592	11.7934	12.4224	11.8944	12.6133	13.5275	13.183	12.3714	12.9687	12.5284	14.7065	10.1632	11.7035	12.1634	12.0096	12.2571	12.8027	12.6403	11.4965	2	2	20.5
A0PK00	Transmembrane protein 120B	TMEM120B	13.7856	16.0905	15.2119	16.0166	15.7025	16.8299	15.5356	15.9786	17.1785	15.5706	16.4878	17.0979	13.1244	13.6806	17.1984	16.4717	17.2502	16.5117	14.6272	11.1539	12.5443	15.3533	15.6987	15.8177	16.216	16.4112	16.6565	3	3	14.2
A1A4S6	Rho GTPase-activating protein 10	ARHGAP10	17.6417	16.1639	17.6804	17.6586	17.5417	17.0618	16.9933	17.3456	15.8197	18.8533	18.6059	18.7532	14.9044	14.9266	15.1578	14.1478	14.24	13.7143	16.0745	10.8959	16.2519	16.7632	15.8453	15.5745	17.3218	16.9988	18.452	17	16	30.5
A1L0T0	Acetolactate synthase-like protein	ILVBL	16.6251	16.86	16.218	16.7266	16.4314	16.2716	16.3196	16.8709	17.4636	17.4637	17.1868	18.1685	14.1561	14.0722	14.7654	14.9547	12.8534	10.7747	16.0988	10.1979	12.7887	14.9472	14.4445	16.1325	17.5435	16.8174	18.122	14	14	41.5
A1L4H1;A1L4H1-2	Soluble scavenger receptor cysteine-rich domain-containing protein SSC5D	SSC5D	12.0366	13.2539	11.8411	15.4724	11.6867	12.2411	11.9372	11.7519	11.9558	15.9824	15.4354	16.3786	11.7226	13.392	13.2935	11.7889	12.7461	12.9401	11.4714	10.8831	12.0935	11.3631	12.4681	11.6194	15.2139	16.0267	12.3363	5	5	7.1
A1X283	SH3 and PX domain-containing protein 2B	SH3PXD2B	16.5101	16.0046	16.8589	17.025	16.5533	17.102	16.7835	17.4453	14.7432	17.4023	17.6822	16.6024	12.6835	12.3327	15.274	17.2214	17.0381	17.4237	16.4797	10.9513	17.6781	16.4065	18.5592	17.5104	16.6328	16.9322	17.8676	16	16	31.4
A1XBS5;A1XBS5-4;A1XBS5-3;A1XBS5-5;A1XBS5-2	Protein FAM92A1	FAM92A1	17.1641	17.2009	17.3235	15.5357	15.7752	13.0503	14.9983	14.0136	14.1611	13.1955	13.2739	13.8824	13.5618	13.2729	12.9916	12.943	12.1436	13.9537	12.4839	12.598	12.3586	11.8142	10.6917	12.4601	14.3444	12.5559	16.4069	4	4	21.5
A2A3N6	Putative PIP5K1A and PSMD4-like protein	PIPSL	11.9537	15.7419	14.6081	12.0583	15.4027	12.9151	11.7252	15.4723	12.44	15.177	15.0588	13.3586	15.92	12.335	17.2263	13.2691	11.7644	11.9073	15.4152	11.8239	14.8713	12.2169	11.8835	16.3018	16.0137	13.0132	11.6625	9	1	16.4
A2RRP1;A2RRP1-2	Neuroblastoma-amplified sequence	NBAS	17.0665	17.5135	16.6839	16.591	15.9177	15.8644	16.2646	16.3537	16.8802	17.339	16.8748	17.6618	13.5667	14.946	14.8618	15.7602	15.3925	15.4976	16.6868	11.0332	14.1265	17.3569	16.3939	16.0091	17.8763	17.9921	17.5701	42	41	27.2
A2RUS2;A2RUS2-2	DENN domain-containing protein 3	DENND3	16.0172	15.7643	15.884	16.0172	15.4912	15.3472	14.3766	14.2058	14.4578	17.0731	16.7923	13.947	14.395	12.738	14.9069	15.0903	12.8833	14.9534	13.0438	11.2057	12.7048	14.4428	12.2235	13.2127	13.638	13.6475	13.2733	15	14	20.4
A3KMH1;A3KMH1-3;A3KMH1-2	von Willebrand factor A domain-containing protein 8	VWA8	16.1714	15.7659	15.726	15.3573	15.5695	14.3036	16.9943	16.8881	15.7551	16.9955	16.8184	15.9468	13.8448	15.4093	15.19	14.559	12.8018	13.6681	15.7214	15.9039	16.2529	15.3897	14.6637	14.7875	18.2416	17.7723	17.9557	41	39	30.9
A4D1E9;A4D1E9-2	GTP-binding protein 10	GTPBP10	13.8471	12.3685	12.7442	12.5961	12.2009	11.6524	11.6066	12.9897	13.6034	11.6558	11.8239	13.2294	12.5861	14.4937	14.0079	12.7994	13.8003	13.8921	13.9394	12.7069	14.3445	12.696	12.7606	12.3438	13.7433	13.7794	14.2743	5	5	18.9
A5A3E0	POTE ankyrin domain family member F	POTEF	12.3508	12.0729	14.1251	13.5838	11.8476	14.1053	11.9578	16.1118	12.27	12.9903	12.8285	12.2973	13.9744	14.3156	13.202	11.3206	12.2175	10.8811	13.9448	16.083	12.7516	12.941	15.889	12.7688	13.2029	12.4987	11.7607	12	1	13.7
A5D8V6	Vacuolar protein sorting-associated protein 37C	VPS37C	14.934	15.7296	14.7479	15.0044	14.6116	15.5076	14.4433	14.3503	13.9177	15.357	15.4899	15.8722	12.5032	13.5002	15.3139	11.813	13.1918	12.5807	14.1607	10.7642	16.3095	13.3625	13.5762	11.8272	15.0961	15.7197	15.745	2	2	11
A5PLL7;A5PLL7-2	Transmembrane protein 189	TMEM189	13.2485	11.9909	10.6705	11.1085	10.5403	12.459	11.3768	11.4759	12.9957	10.8407	12.5747	12.6819	16.8169	16.6657	16.6896	12.3234	12.0536	12.2973	15.3063	11.9833	16.3846	14.8361	12.2687	12.1346	11.9441	12.281	12.4693	2	1	10.7
A5YKK6;A5YKK6-2;A5YKK6-3	CCR4-NOT transcription complex subunit 1	CNOT1	18.4917	18.9569	18.1075	17.9723	17.7591	16.7116	18.4221	18.2686	17.7263	17.8585	17.3243	17.5548	17.4426	18.3953	18.5752	16.8577	16.2451	17.2664	17.4562	14.5661	17.6354	17.7825	16.3399	17.5897	17.4234	17.5416	18.102	58	22	36.3
Q9GZQ8;A6NCE7	Microtubule-associated proteins 1A/1B light chain 3B;Microtubule-associated proteins 1A/1B light chain 3 beta 2	MAP1LC3B;MAP1LC3B2	18.1084	18.3392	17.9599	17.9513	17.94	17.3836	17.7409	17.3038	17.2266	18.8162	18.2619	18.786	12.2028	14.8878	15.0496	17.5564	16.8902	17.33	18.5951	10.2111	17.01	18.2258	17.5292	17.7916	18.0299	18.4109	18.2698	2	1	16.8
A6NCN2	Putative keratin-87 protein	KRT87P	11.4856	12.1858	11.8061	12.8072	11.7165	11.8216	12.5791	13.6847	12.2899	11.6333	11.4886	14.6285	12.9368	12.8992	12.9961	16.8002	14.6543	13.8938	11.8375	11.486	12.8509	14.775	12.4038	11.7781	12.9541	12.8971	11.7225	5	1	25.9
A6NDG6	Phosphoglycolate phosphatase	PGP	12.3558	14.9615	11.4497	11.7889	12.2439	14.2784	11.547	11.5727	12.5532	13.3722	11.4895	12.6441	17.0998	17.3406	17.2877	12.1432	17.3161	12.9975	12.852	9.8179	15.4696	11.0556	12.492	10.8016	15.9573	16.3508	15.272	8	8	41.7
A6NDU8	UPF0600 protein C5orf51	C5orf51	12.3522	12.5475	11.336	12.7259	10.4688	12.1216	12.7694	11.8847	12.6569	11.1891	13.3532	12.0921	17.843	17.1294	17.9794	12.7544	13.2858	13.7687	15.2922	11.7105	11.7395	11.6449	13.1695	11.5483	12.4989	13.135	10.9873	11	11	44.6
A6NFI3	Zinc finger protein 316	ZNF316	14.6065	15.5821	15.0946	14.2274	14.7942	13.7337	14.8027	14.7481	13.3759	13.1372	12.0002	13.589	13.097	12.9808	12.5021	13.3962	13.828	13.3229	12.3118	10.8558	11.9862	12.3457	12.3392	11.9436	13.695	13.0953	14.8693	2	2	4.5
A6NFQ2;A6NFQ2-2;A6NFQ2-3	TRPM8 channel-associated factor 2	TCAF2	14.5236	12.7195	13.8992	13.092	14.1182	10.6563	12.4669	11.9296	12.9489	13.4582	12.5897	12.1207	12.3392	12.6529	13.2729	13.5621	12.5207	11.7435	13.5693	11.133	13.5556	14.1658	11.7565	13.2493	12.1432	13.0753	12.5718	5	5	12.3
A6NHR9;A6NHR9-2	Structural maintenance of chromosomes flexible hinge domain-containing protein 1	SMCHD1	18.6561	18.6633	18.661	19.1325	19.0753	18.6083	19.6345	19.323	19.3762	16.3861	16.7788	17.6728	17.4903	18.4433	18.1581	15.4622	15.1815	16.0852	16.6577	11.7513	15.3725	14.9696	14.7627	14.805	18.3972	18.4046	18.7457	57	56	40.5
A6NJ78	Probable methyltransferase-like protein 15	METTL15	14.9159	12.4589	11.5608	12.651	12.6911	14.3723	12.171	13.8187	13.7915	9.85636	12.1538	12.4958	11.8602	15.0841	15.2188	12.1807	13.2984	11.562	12.8482	11.934	12.0225	12.8258	10.9477	11.8883	12.967	12.8797	12.2793	2	1	7.4
A8CG34;Q96HA1;Q96HA1-2;A8CG34-2;Q96HA1-3;Q6PJE2;Q6PJE2-5	Nuclear envelope pore membrane protein POM 121C;Nuclear envelope pore membrane protein POM 121;POM121 and ZP3 fusion protein	POM121C;POM121;POMZP3	12.7607	13.1606	12.0486	13.2109	11.3147	13.0999	13.9956	14.1674	12.407	12.422	13.1245	13.7392	13.7218	13.0218	11.97	12.6072	12.1364	10.3219	12.9642	12.3358	13.9878	11.8115	12.6063	12.3949	12.7498	13.485	11.8469	2	2	4
A8MW92;A8MW92-4;A8MW92-2	PHD finger protein 20-like protein 1	PHF20L1	12.1851	12.7872	13.0941	13.6298	11.0857	13.3786	12.359	12.8359	14.3024	11.4564	11.0867	13.2178	13.0901	13.4952	12.4456	11.5564	13.3292	9.68555	14.0016	11.0922	13.172	11.2317	11.0495	13.1015	13.5114	13.905	12.4885	2	2	2.3
A8MXV4	Nucleoside diphosphate-linked moiety X motif 19, mitochondrial	NUDT19	11.5676	12.4002	12.5749	11.6554	12.698	12.262	12.4266	10.4821	12.7535	11.7318	12.5144	12.6115	16.3585	15.8662	15.62	12.1704	13.3521	11.2156	13.577	11.9121	11.583	12.1658	11.8137	11.6908	11.3286	12.8088	11.5773	6	6	17.9
A9UHW6;A9UHW6-2;A9UHW6-3	MIF4G domain-containing protein	MIF4GD	12.1495	12.6532	12.2183	12.5931	11.6521	15.729	10.8992	12.9855	12.2326	12.5198	13.2604	11.1096	12.4913	15.1223	15.2583	12.3621	12.9444	12.4846	12.4681	11.1059	12.9844	12.1695	11.5348	11.5887	13.5791	11.6458	12.2238	5	5	34.2
P0CG08;B7ZAQ6;B7ZAQ6-2;B7ZAQ6-3	Golgi pH regulator B;Golgi pH regulator A	GPR89B;GPR89A	12.8348	12.17	14.8421	15.021	15.2088	14.9885	14.746	16.4182	15.4222	16.2425	14.7542	13.0034	13.1981	13.3024	14.1935	14.8459	15.812	15.9232	12.3578	11.6629	11.91	15.8756	15.5186	13.0161	14.7197	12.4209	14.9141	5	5	17.1
C4AMC7;Q6VEQ5;A8K0Z3;Q9NQA3	Putative WAS protein family homolog 3;WAS protein family homolog 2;WAS protein family homolog 1;WAS protein family homolog 6	WASH3P;WASH2P;WASH1;WASH6P	15.5811	17.2546	15.374	18.995	16.4435	18.7741	15.3343	17.1626	17.4818	17.9716	18.9376	17.5592	12.685	12.2095	12.8948	17.656	17.3939	15.6025	17.7004	11.0355	13.0207	12.3135	12.8585	12.4884	17.4865	19.3234	17.3241	8	8	18.8
O43374;C9J798;O43374-2	Ras GTPase-activating protein 4;Putative Ras GTPase-activating protein 4B	RASA4;RASA4B	12.2475	14.7612	12.4474	13.6434	12.5183	12.299	13.0041	10.7079	11.889	11.5376	11.6316	14.4218	12.8312	12.6093	12.1673	12.3015	12.5544	12.3714	13.8789	11.3402	11.9779	12.0369	12.0662	12.4398	11.5681	13.6492	12.2885	3	3	6.2
C9JLW8	Protein FAM195B	FAM195B	15.8745	16.6203	15.6793	16.4958	15.6328	16.5991	16.3747	15.9961	16.7285	15.8241	15.4731	12.2258	17.3321	16.8	17.3024	17.2715	12.236	16.5756	17.6296	9.88517	16.5308	16.6835	11.9126	17.1332	16.2675	16.6503	15.2399	5	5	51.5
E9PAV3;Q13765;E9PAV3-2	Nascent polypeptide-associated complex subunit alpha, muscle-specific form;Nascent polypeptide-associated complex subunit alpha	NACA	21.4341	21.2838	22.0385	21.8161	20.0139	21.6824	21.4756	21.2581	21.7679	21.1764	21.4555	22.1823	20.5932	20.3756	20.8564	21.4008	21.4546	21.5208	21.1134	17.8907	20.2104	20.3311	21.3682	20.9836	21.2668	21.2103	21.0948	5	4	3.4
P63165;G2XKQ0;P63165-2	Small ubiquitin-related modifier 1;Small ubiquitin-related modifier	SUMO1	13.7323	12.1501	12.4326	12.844	12.2623	14.1549	12.3972	12.6912	13.2266	16.4612	13.0495	12.2547	18.075	17.6906	17.5469	15.5678	12.8805	16.6167	12.8149	10.8586	13.7704	13.4301	11.3905	11.8118	16.7778	16.8525	12.3092	2	2	18.8
L0R819		ASNSD1	15.6395	14.5852	14.9009	14.5557	14.1768	13.8187	15.2745	12.3915	12.4194	14.9106	15.0964	14.5692	12.9794	13.6299	13.3292	13.03	13.0965	13.863	15.409	13.0537	12.2949	12.0357	15.2165	12.7893	13.7808	14.1371	14.8759	4	2	38.5
O00115;O00115-2	Deoxyribonuclease-2-alpha	DNASE2	12.0771	19.9949	19.2303	11.2951	19.9506	19.935	19.21	19.1766	12.0319	12.5459	12.2485	12.5025	12.7568	13.0445	17.5242	12.4899	13.5536	11.8595	12.8121	10.4167	12.1006	11.968	12.906	12.2755	18.4827	12.3807	18.9415	5	5	25.3
O00116	Alkyldihydroxyacetonephosphate synthase, peroxisomal	AGPS	15.1855	14.5046	15.1229	15.8661	16.1077	15.7547	15.5764	15.4984	14.0579	15.0021	14.5976	14.8263	16.1961	17.3934	17.4322	11.6101	13.8872	12.8647	17.2729	10.3327	17.3893	16.2251	15.1001	15.3225	14.0437	14.6924	15.4831	17	17	36.3
O00139;O00139-1;O00139-5;O00139-4;O00139-2	Kinesin-like protein KIF2A	KIF2A	17.1248	16.0766	17.1953	17.372	17.4464	17.2225	17.7787	17.7372	16.4407	17.841	17.8753	16.2718	15.5286	16.1326	14.6935	15.1358	14.6587	15.5486	17.3479	11.8805	15.7356	16.9643	18.0505	17.085	15.7333	15.0894	17.1419	16	15	32.9
O00148;O00148-2;O00148-3	ATP-dependent RNA helicase DDX39A	DDX39A	16.2646	17.5539	15.8296	17.1266	16.4728	16.6273	16.6095	16.6814	13.124	12.0517	15.5165	16.5568	18.5466	19.6793	18.8162	13.5367	13.368	15.2236	17.1345	12.2304	12.98	11.5487	11.993	12.3553	15.7599	12.1874	13.0315	19	8	55.3
O00151	PDZ and LIM domain protein 1	PDLIM1	21.0671	20.5477	20.4711	20.4284	20.4746	20.054	19.8082	20.6543	21.3461	19.6841	19.3874	19.0323	18.0486	19.4162	18.6469	22.5211	22.6705	22.1706	20.2931	10.9315	19.2203	17.8147	18.9898	20.2533	22.2187	22.1324	21.6464	23	23	80.2
O00154;O00154-4;O00154-6;O00154-7;O00154-5;O00154-2;O00154-3	Cytosolic acyl coenzyme A thioester hydrolase	ACOT7	13.8882	13.8173	13.5888	12.8875	12.6706	11.7953	12.9215	11.0023	13.0245	13.5141	12.9801	16.9112	17.9488	18.0777	18.1996	15.8749	15.359	13.0304	16.225	12.6011	16.1915	13.1536	13.8557	13.6415	16.768	16.7937	14.539	13	12	44.2
O00159;O00159-3;O00159-2	Unconventional myosin-Ic	MYO1C	17.3927	17.8421	17.9107	19.0257	18.8569	19.1486	18.451	18.5795	19.5544	18.5783	19.3506	19.0258	16.7105	17.0871	16.8571	18.4742	18.1901	18.7978	18.5	14.5329	17.7557	17.9022	17.9002	18.9895	18.4108	18.9573	18.8302	41	41	43.7
O00161;O00161-2	Synaptosomal-associated protein 23	SNAP23	12.9033	15.7213	11.928	15.9353	13.8742	15.3707	15.8803	11.9499	17.7214	14.7761	15.3857	16.4521	12.8439	13.4694	12.6774	16.054	16.5169	11.8984	18.8184	11.1309	12.9981	12.7245	13.4343	13.9636	16.0835	16.7547	11.5651	6	6	52.1
O00165;O00165-5;O00165-3;O00165-2;O00165-4	HCLS1-associated protein X-1	HAX1	11.845	13.0205	12.8868	12.3837	12.7135	11.7768	12.393	12.2187	14.1684	12.3019	10.7767	11.5951	16.8538	17.3834	17.3141	13.4792	13.7302	13.0416	15.8105	9.72117	12.9406	16.0133	10.9049	12.8153	13.283	11.6054	12.1344	2	2	12.9
O00170	AH receptor-interacting protein	AIP	16.0301	16.4645	15.3853	15.5525	16.5674	15.6947	15.4534	14.9447	16.908	15.9147	14.0346	16.2243	18.3509	18.6404	18.4998	16.7939	18.4779	16.5862	15.1452	11.8412	15.9341	15.7256	14.3485	10.7577	16.6877	16.011	15.478	10	10	44.8
O00178	GTP-binding protein 1	GTPBP1	16.9658	17.5136	17.0365	17.3424	17.027	17.3718	17.0373	17.3361	16.6975	17.3236	17.1621	17.2826	16.4212	17.3232	17.3092	14.8886	13.6545	14.7999	17.6092	10.3999	16.6651	17.7647	16.0233	16.7248	17.38	17.1018	17.4112	10	10	27.8
O00186	Syntaxin-binding protein 3	STXBP3	15.4178	15.6899	14.9447	14.5364	15.3995	15.45	14.8787	14.6623	16.1777	15.2175	15.556	15.5713	16.6269	16.7171	16.6126	14.7518	13.1765	13.1623	15.5104	11.4515	15.6956	12.9901	11.2521	14.3134	15.8017	16.1241	15.9258	16	16	41.2
O00203;O00203-3	AP-3 complex subunit beta-1	AP3B1	19.0446	19.8153	19.5113	19.0528	18.3973	18.9294	19.0238	18.7728	19.368	19.3946	19.5582	20.5413	14.3482	16.2909	16.4652	19.788	20.2497	19.7691	18.7054	12.8841	18.4563	18.3099	18.6726	18.6718	19.9479	20.1199	19.7238	36	32	41
O00217	NADH dehydrogenase [ubiquinone] iron-sulfur protein 8, mitochondrial	NDUFS8	18.5373	19.1816	18.5429	18.4797	18.2842	18.8149	18.581	18.4975	19.6054	19.3206	19.3999	20.0956	18.2091	18.4485	17.873	18.9274	19.5436	17.8611	18.0979	11.4045	17.3494	17.4829	16.5142	17.4438	19.5269	19.4821	19.3516	5	5	31
O00231;O00231-2	26S proteasome non-ATPase regulatory subunit 11	PSMD11	19.3749	20.4716	19.2723	19.0959	18.8097	19.1651	19.4226	19.618	20.3202	17.4231	17.7166	19.031	19.7195	19.0095	19.8636	19.5944	20.3222	19.5195	19.0512	11.7711	19.8725	18.9593	18.7685	18.7948	19.4344	20.1416	19.2985	28	27	61.1
O00232;O00232-2	26S proteasome non-ATPase regulatory subunit 12	PSMD12	18.2997	17.7083	18.077	18.2293	17.9736	17.3625	18.7745	18.8329	18.1832	16.56	16.3659	17.2245	17.7429	17.2512	18.5448	19.0369	18.2384	19.273	18.1983	14.9957	18.2794	16.4066	18.2954	18.0147	18.1425	18.0443	17.8613	24	24	55.9
O00233;O00233-2;O00233-3	26S proteasome non-ATPase regulatory subunit 9	PSMD9	12.988	16.1475	13.0987	12.0476	12.3754	11.9944	12.6627	12.9785	13.0876	10.7348	11.8484	16.008	12.9774	12.5342	13.7406	17.8392	12.9533	13.6118	12.2162	11.3162	13.391	13.3782	11.0536	13.9113	16.6838	17.0684	15.9419	4	4	27.4
O00244	Copper transport protein ATOX1	ATOX1	13.4124	12.5994	12.2883	12.3065	11.8908	11.3601	11.7208	8.93227	13.0034	10.8652	13.4624	12.3795	17.828	16.6861	17.5435	11.5929	13.0353	12.192	13.7987	11.8006	15.3158	12.6592	10.8551	11.7142	10.0443	11.4367	10.325	7	7	69.1
O00255-3;O00255-2;O00255	Menin	MEN1	14.5652	16.0961	14.3019	14.5955	14.1165	13.7324	14.5682	14.2061	15.6524	11.795	12.1006	13.6993	12.5697	13.2395	15.3592	11.9311	13.0979	12.5522	14.2233	10.6121	13.1234	12.3613	12.5459	11.7241	13.0403	12.3102	13.9896	6	6	17.4
O00257	E3 SUMO-protein ligase CBX4	CBX4	12.538	12.1531	13.2494	15.5951	15.2861	13.2933	15.5603	15.3908	12.6944	11.6842	12.4278	12.187	14.8749	18.1392	16.0718	12.1338	12.9508	11.9489	15.1607	10.6747	12.9367	15.537	12.7741	14.6294	12.2009	12.1037	13.1832	3	3	10.5
O00264	Membrane-associated progesterone receptor component 1	PGRMC1	16.7084	18.238	16.7062	18.1003	17.5185	18.4208	16.8	17.0767	18.3852	16.8403	16.7023	17.6429	14.1928	15.2714	14.982	19.4921	19.5315	17.9339	17.4295	9.87985	17.8377	16.9485	16.1493	17.2147	18.6164	18.5331	17.9551	5	5	35.4
O00267;O00267-2	Transcription elongation factor SPT5	SUPT5H	17.5884	17.9292	17.353	17.3171	17.5128	16.5868	17.5027	17.7839	16.1656	16.8138	16.936	16.6598	19.9389	20.6224	19.9317	15.2551	14.0813	16.8853	17.9587	12.3686	17.1921	17.3259	17.8823	17.041	17.671	17.4552	16.8011	24	24	35.9
O00268	Transcription initiation factor TFIID subunit 4	TAF4	13.9172	13.3908	12.7365	11.6319	12.9694	12.1209	14.5115	12.3028	13.6294	11.7619	13.2499	12.5876	18.0983	17.2374	18.8757	12.5942	13.2158	13.3533	15.7386	11.3509	13.7273	12.9524	11.6687	13.1568	13.3346	13.9142	10.8475	10	10	17
O00273;O00273-2	DNA fragmentation factor subunit alpha	DFFA	9.46765	12.6989	13.08	12.0832	11.7797	12.3957	11.9836	11.8585	14.5624	13.1297	11.18	10.6462	17.4693	17.4642	16.5519	13.4651	13.549	12.3014	12.4143	9.75196	14.4951	11.9872	11.2902	15.1141	12.091	13.7204	12.4083	12	10	48.3
O00287	Regulatory factor X-associated protein	RFXAP	13.3491	14.4415	13.2928	13.6744	13.4034	14.3011	11.9117	12.6782	13.1872	11.6224	13.7189	14.006	13.3986	12.873	13.1629	12.7389	13.1247	10.7492	12.0125	11.3298	11.3586	13.1547	11.4357	13.0091	12.0611	13.9556	14.346	2	2	8.5
O00291;O00291-4;O00291-3	Huntingtin-interacting protein 1	HIP1	18.3659	18.5159	17.0594	18.6417	18.0704	17.6024	16.5805	16.8078	17.3561	16.4606	15.2785	14.1459	19.1756	18.0748	17.8002	16.8145	15.8763	15.2099	17.0739	16.3486	15.9214	17.5829	13.9096	17.4992	16.6735	17.8005	16.8157	28	28	41.4
O00299	Chloride intracellular channel protein 1	CLIC1	17.3405	18.8595	18.029	18.6956	17.4343	19.1964	17.2682	17.8606	18.9007	17.3547	18.2546	19.1722	16.4853	18.0006	17.5378	20.1772	20.0657	19.4945	19.4352	17.7256	19.7126	17.7274	18.42	17.3715	19.4666	19.6318	18.8245	19	19	81.7
O00300	Tumor necrosis factor receptor superfamily member 11B	TNFRSF11B	18.0801	19.4393	18.7483	17.9247	17.5185	18.027	17.4117	17.0914	17.3432	18.7559	18.6679	20.0424	13.5722	11.7447	14.4728	16.1097	16.5854	16.5825	16.2663	10.2517	15.7512	13.2293	13.4897	15.4749	18.514	18.9598	18.7375	9	9	30.4
O00303	Eukaryotic translation initiation factor 3 subunit F	EIF3F	19.6536	21.1568	20.3339	20.9674	20.1203	20.918	19.7983	20.5284	20.6139	20.3119	20.7843	21.4805	18.8448	18.6406	19.0539	21.0414	21.1058	19.8958	19.8397	15.8479	19.7829	19.5133	20.3308	20.1075	21.0585	21.5445	20.4505	14	14	56
O00308;O00308-3;O00308-2	NEDD4-like E3 ubiquitin-protein ligase WWP2	WWP2	13.6886	14.1754	12.7737	13.8931	13.7209	12.7235	13.8491	13.2355	13.7526	13.9756	13.6626	13.501	13.1911	13.052	13.2502	12.8108	13.1393	13.1929	12.9797	8.70105	13.5491	13.3261	11.8122	12.6518	12.0551	12.9604	13.0356	3	2	4.4
O00311	Cell division cycle 7-related protein kinase	CDC7	12.1844	12.8199	12.5996	13.0108	11.5552	12.2733	11.5264	10.4627	13.856	12.1614	11.6691	11.1472	14.2731	15.7134	14.9028	12.7325	14.7259	12.4909	13.0597	10.6265	13.1583	12.5715	11.2376	13.0195	13.175	12.1561	13.5558	2	2	5.1
O00330;O00330-3	Pyruvate dehydrogenase protein X component, mitochondrial	PDHX	11.3363	13.5408	12.386	11.8745	12.5351	12.4192	12.9449	11.4689	13.1443	12.5664	11.7247	11.6972	15.5447	13.3687	14.8984	12.8439	12.2463	12.0569	14.6723	11.1948	11.5922	11.4856	12.4705	13.5305	12.6862	12.5911	12.1938	10	7	24.4
O00339;O00339-3;O00339-2;O00339-4	Matrilin-2	MATN2	14.147	15.1291	13.5123	12.4968	11.2462	14.855	12.3326	11.5354	13.9457	14.4101	15.1889	16.2789	12.8675	13.1698	11.883	12.5516	13.7087	12.5214	12.6367	12.0983	11.7055	11.6342	11.1885	12.1179	14.7093	15.2871	15.4888	5	5	7
O00391	Sulfhydryl oxidase 1	QSOX1	20.4113	20.7844	20.2925	18.7512	18.4031	18.4324	18.9541	19.1505	19.1817	19.044	18.7357	19.4413	17.1604	12.083	12.4244	18.3651	17.8115	18.7779	16.6318	18.3391	14.7693	17.1341	16.3059	17.8414	20.2529	20.0771	19.9566	24	3	40.4
O00391-2	Sulfhydryl oxidase 1	QSOX1	14.6777	16.5639	15.6179	12.7608	14.7262	14.3688	12.2309	15.1086	12.3963	13.4955	12.151	11.6192	13.3539	13.9213	15.0095	12.88	13.4649	12.7764	13.8681	11.0696	13.0812	12.7126	13.3888	11.3436	15.5149	15.7818	15.9765	22	1	47
O00399	Dynactin subunit 6	DCTN6	15.3618	14.7338	16.8602	16.0749	15.7358	16.2137	15.8297	16.1142	15.7046	17.2801	17.6905	16.074	15.6133	12.7335	14.407	16.1143	12.5534	15.9246	16.4354	8.87222	16.8454	12.1135	16.3431	16.5119	16.1846	15.7984	17.1874	4	4	45.8
O00401	Neural Wiskott-Aldrich syndrome protein	WASL	14.2339	17.2372	16.1858	16.4267	14.9579	17.0378	15.1394	15.9116	15.8564	15.5713	16.0345	17.6872	12.9076	13.4815	12.5763	15.6947	12.3604	16.0544	14.0658	12.4695	14.8088	13.8394	16.9497	15.5403	16.7334	17.2054	17.7432	8	8	27.1
O00410;O00410-3;O00410-2	Importin-5	IPO5	17.3365	17.1918	17.1743	16.991	17.2011	15.9015	16.3504	16.2793	15.4603	16.0943	16.0936	16.5198	19.2932	18.9434	19.2087	14.7893	14.1047	14.1785	18.2304	9.31838	17.9186	17.0429	14.691	16.1232	15.6065	15.4273	15.2444	53	49	73.5
O00411	DNA-directed RNA polymerase, mitochondrial	POLRMT	13.8761	15.17	13.6288	14.6763	14.4179	14.9738	14.7016	14.7308	16.1695	15.1456	15.4354	15.8391	14.9742	15.9893	15.4409	11.7477	13.5884	11.3813	14.5035	11.8092	12.7697	13.1539	11.7764	12.0904	14.487	14.6583	13.7077	7	7	9.8
O00418	Eukaryotic elongation factor 2 kinase	EEF2K	16.8881	17.3055	16.7238	12.3744	16.0721	12.5651	16.4124	12.2671	16.6643	11.7959	12.2872	16.3805	12.6769	12.9745	13.0616	13.0137	11.785	11.6203	13.1795	11.6665	12.3706	11.9117	12.4858	11.9121	11.7901	13.387	11.6545	3	3	6.8
O00422-2;O00422	Histone deacetylase complex subunit SAP18	SAP18	18.8002	19.2559	19.17	19.6228	19.5378	20.3335	19.7462	19.7153	19.9666	17.7837	18.5592	19.4189	17.3472	17.7651	17.4053	16.5139	16.7043	18.5504	18.114	11.4893	17.8647	16.8008	18.9649	18.2551	19.0635	19.7313	19.8159	7	7	44.2
O00423;O00423-3	Echinoderm microtubule-associated protein-like 1	EML1	16.4604	16.9112	16.9779	16.9194	16.8512	16.6615	17.1306	17.1066	15.7653	15.9086	16.2915	16.5072	12.9973	13.7009	14.9952	16.5865	14.1066	17.5273	11.709	11.8847	13.3227	11.7367	10.8788	12.1671	16.732	16.4982	17.0982	24	23	46.6
O00425	Insulin-like growth factor 2 mRNA-binding protein 3	IGF2BP3	20.4178	21.2822	20.6794	21.129	20.6838	21.4341	20.462	20.7492	21.1654	21.7172	22.2244	21.9059	13.6713	12.4829	12.5848	21.6984	21.2954	21.1587	15.8328	9.95528	15.5537	16.1957	17.3416	16.5426	22.4302	22.5456	21.7666	17	16	36.4
O00429;O00429-6;O00429-3;O00429-5;O00429-7	Dynamin-1-like protein	DNM1L	19.9661	20.7404	20.5463	18.9958	18.455	19.3947	19.0407	18.8735	19.1463	19.3188	19.2125	19.7504	18.0024	18.8266	19.502	19.672	18.6897	19.0117	18.0872	11.0919	19.7372	17.8418	18.8126	16.8621	19.7846	20.2156	20.0029	36	1	61.7
O00429-2;O00429-8;O00429-4;O00429-9	Dynamin-1-like protein	DNM1L	18.2563	16.3061	18.6967	16.2347	12.1956	12.353	17.9829	13.2685	14.1158	17.8091	17.1271	15.0173	13.0072	15.9822	18.5262	17.3298	13.5823	17.0066	16.4932	12.3145	11.8451	14.0557	11.3504	20.3248	17.0228	17.0029	18.273	36	1	62.5
O00442;O00442-2	RNA 3-terminal phosphate cyclase	RTCA	17.7718	18.4397	17.6598	17.4161	17.3101	17.9214	17.1176	17.1184	18.3491	17.5629	17.5262	18.4453	15.7322	16.3441	16.2364	18.5725	18.7753	17.7533	16.4929	10.7763	17.2822	16.9124	16.3771	16.3444	18.4999	19.0354	18.1933	12	12	54.6
O00443	Phosphatidylinositol 4-phosphate 3-kinase C2 domain-containing subunit alpha	PIK3C2A	14.6103	14.989	14.2379	13.9419	13.3946	13.5423	14.4993	13.9621	15.0404	15.1427	14.9306	14.6534	18.4443	19.0785	19.3457	13.0769	12.9577	12.0253	15.9016	11.7911	15.1891	14.3019	13.2267	15.3245	13.91	13.8608	14.6851	18	18	15.5
O00458;O00458-2	Interferon-related developmental regulator 1	IFRD1	12.8652	13.7071	12.6753	13.5828	13.2526	13.11	12.2964	12.8816	13.8346	12.39	12.3446	13.6773	12.773	13.0484	12.4334	12.7053	13.0966	12.8584	13.8205	10.4327	12.0823	14.7125	10.5574	11.7785	13.191	14.3159	12.1742	3	3	9.1
O00461	Golgi integral membrane protein 4	GOLIM4	18.8123	15.6817	17.861	17.3532	17.5905	16.9703	17.7189	17.3106	17.4447	19.2897	17.4608	18.6521	18.3145	16.9579	16.5341	16.7582	16.8779	16.6014	17.7335	11.4044	17.5566	19.1396	18.4604	17.4174	17.1309	17.3623	18.9708	7	6	17
O00468-6;O00468-3;O00468;O00468-5;O00468-4;O00468-7;O00468-2	Agrin;Agrin N-terminal 110 kDa subunit;Agrin C-terminal 110 kDa subunit;Agrin C-terminal 90 kDa fragment;Agrin C-terminal 22 kDa fragment	AGRN	13.1742	16.4727	15.1779	18.5757	18.4363	18.5849	17.5995	18.2306	18.3851	18.9216	19.7975	19.0501	13.7528	15.3523	14.6658	16.9954	15.7734	17.1474	15.7234	9.9163	14.7235	13.7005	17.6106	18.2656	17.6859	18.1141	18.3396	24	23	17.8
O00469-2;O00469	Procollagen-lysine,2-oxoglutarate 5-dioxygenase 2	PLOD2	16.9395	17.5884	16.5702	17.4553	17.0841	17.4713	17.196	17.8517	18.221	17.4719	17.3355	17.6782	18.744	18.7611	18.6975	17.4453	16.5569	16.2621	20.5656	15.2698	20.1377	20.3791	20.0264	21.2547	17.6222	18.2683	17.0692	29	28	51.8
O00470;O00470-2;O14770-6	Homeobox protein Meis1;Homeobox protein Meis2	MEIS1;MEIS2	16.1435	15.7514	14.8176	16.1869	16.0626	16.1285	15.2341	16.3112	15.5044	14.3217	15.1841	14.7702	16.6007	16.4591	16.8761	10.6129	12.8986	12.3698	15.5239	11.0289	15.2187	15.6378	11.9369	13.4369	11.8545	13.6616	14.2725	7	2	25.9
O00471	Exocyst complex component 5	EXOC5	18.2273	17.4536	17.5103	18.2176	17.9855	16.6078	18.4376	18.2658	17.0164	18.2771	17.7097	16.9525	13.323	13.2531	14.129	16.9466	15.5595	17.8323	15.5601	11.8751	14.3405	15.9074	16.5238	17.4568	17.2076	17.1795	17.7226	22	22	41.4
O00472	RNA polymerase II elongation factor ELL2	ELL2	13.3171	13.1791	13.5709	11.6191	13.2761	13.6257	13.6961	13.5208	12.8632	13.3556	12.2461	13.6535	13.4392	13.8898	11.9634	12.3162	13.804	11.943	12.7502	11.0727	12.3016	12.2281	11.8879	12.7117	12.3318	12.7616	13.5344	4	4	7
O00483	Cytochrome c oxidase subunit NDUFA4	NDUFA4	16.3889	13.2762	16.1946	16.9858	16.6065	17.4857	16.5382	16.448	16.1264	16.9146	16.8408	16.8764	12.6119	14.2004	16.46	17.3243	16.8869	17.4143	16.8691	11.1788	16.0224	11.7435	12.2189	14.9417	12.8779	12.1822	17.3947	4	4	66.7
O00487	26S proteasome non-ATPase regulatory subunit 14	PSMD14	18.9709	19.2422	19.3658	18.9066	18.2656	18.2748	19.1992	19.2884	18.5574	17.0891	17.7199	17.905	18.5234	17.3165	19.0804	17.9663	18.2248	18.3941	17.3709	10.0179	18.8176	17.8047	18.3505	16.9807	19.2029	19.3971	18.7492	12	11	75.2
O00488	Zinc finger protein 593	ZNF593	12.0097	13.3703	12.0691	12.5817	12.235	12.7579	10.2215	13.3001	12.3578	11.9328	13.144	12.8488	15.408	17.1425	17.0113	12.7307	13.8909	12.3817	12.133	10.7215	17.4298	15.4311	13.0062	12.132	12.1824	12.8228	11.7772	4	4	42.5
O00499;O00499-10;O00499-2;O00499-9;O00499-7;O00499-8;O00499-4;O00499-6;O00499-11;O00499-3;O00499-5	Myc box-dependent-interacting protein 1	BIN1	13.2748	11.1895	12.789	12.2133	12.6012	11.8882	11.3171	11.2316	12.3673	12.7715	11.9841	12.676	13.1995	15.7922	14.9087	13.5893	13.9999	13.7278	14.9472	16.286	15.5225	14.5004	13.3117	12.9464	12.9754	12.8524	14.4195	8	7	21.8
O00505	Importin subunit alpha-4	KPNA3	18.3508	17.2045	17.7259	18.0482	17.893	18.0586	17.7759	17.5257	17.7802	17.6353	17.7384	18.0029	18.1967	17.9725	17.9807	18.4167	17.9708	18.0117	18.3579	14.0004	18.298	18.4276	17.6167	17.576	17.4999	18.4657	18.1362	18	14	60.8
O00506;O00506-3;O00506-2	Serine/threonine-protein kinase 25	STK25	16.2431	15.9366	15.8375	15.1619	14.3412	15.1934	14.8254	14.2942	15.4116	16.0066	15.53	16.3167	15.9041	15.9907	15.7151	16.7162	16.8894	15.5271	14.7842	11.231	15.6469	15.633	15.4029	15.7523	16.1143	16.4457	16.6414	10	4	30.8
O00522;O00522-3;O00522-2	Krev interaction trapped protein 1	KRIT1	12.1887	14.5067	11.4801	14.5197	12.7328	14.5059	12.5264	14.3085	12.8909	11.6448	14.9416	15.9226	13.0057	14.5787	12.7984	12.6216	13.6469	12.5449	13.1483	9.97442	12.3606	11.94	11.6786	12.6165	14.2894	12.8788	14.0482	5	5	10.3
O00534	von Willebrand factor A domain-containing protein 5A	VWA5A	16.5275	16.3412	16.5955	15.5529	15.7468	14.9939	17.564	16.8458	16.4353	11.856	11.5073	12.8585	14.0141	13.0123	14.7318	17.3814	17.6605	16.9079	13.4399	10.2367	15.1443	15.1942	10.8963	15.2112	13.3529	13.3725	13.9619	27	25	51.1
O00541;O00541-2	Pescadillo homolog	PES1	14.3325	16.8511	15.91	16.6311	15.9925	16.8428	16.0444	16.5665	17.6919	15.9798	15.8845	16.5086	16.1444	12.2472	14.5731	15.887	16.4908	14.7104	15.7557	11.2035	16.0453	12.0941	16.2058	13.257	16.0866	16.2923	14.8287	10	9	23.5
O00560;O00560-3	Syntenin-1	SDCBP	17.3778	18.3347	17.691	18.7232	18.7838	19.44	18.5924	18.6446	19.0831	18.0645	18.0737	17.8445	13.3396	14.5159	13.9527	18.9774	18.1164	18.7405	17.2066	12.0542	13.7735	11.6099	16.7637	17.2624	18.1006	18.2482	18.1192	12	1	72.8
O00560-2	Syntenin-1	SDCBP	13.5045	16.0188	11.5049	15.7838	11.4734	16.6317	13.142	14.818	17.035	12.4407	14.9746	15.8845	13.7159	13.3566	13.2218	17.289	17.9128	15.9242	12.1795	12.3911	12.4342	12.4844	11.7815	12.0461	16.0963	16.5432	14.7514	12	1	72.7
O00566	U3 small nucleolar ribonucleoprotein protein MPP10	MPHOSPH10	16.7535	14.8934	16.7139	16.5662	18.0014	17.7517	18.0925	17.3937	16.1946	16.2585	15.869	16.3826	15.118	17.0273	16.3711	13.7761	12.3863	15.0982	17.3608	12.1239	17.1753	16.8954	15.9525	15.6596	14.888	14.5468	15.861	8	8	19.5
O00567	Nucleolar protein 56	NOP56	18.3364	18.8555	18.5896	18.9878	18.602	18.8672	18.7689	18.8624	19.5621	18.1722	18.5263	19.3275	17.1513	17.9133	16.5188	18.1143	17.6185	18.0706	17.531	11.4014	17.0971	17.9853	17.9421	18.1821	18.8525	18.9667	19.3306	23	20	57.9
O00571;O00571-2	ATP-dependent RNA helicase DDX3X	DDX3X	21.177	22.2185	21.4902	21.9352	21.6817	22.5473	21.2916	21.1634	22.6968	21.2033	21.4283	22.3022	19.0619	19.5515	19.3396	21.4602	22.3205	21.5449	20.6647	15.1823	20.5749	20.4916	20.8723	20.7743	21.4892	21.9595	21.9896	28	10	48.9
O00592;O00592-2	Podocalyxin	PODXL	12.1324	13.074	12.1027	11.6493	11.1122	13.2126	12.265	13.6448	12.4874	14.4065	15.2676	14.3009	13.89	12.7499	10.9537	12.2644	13.142	13.0518	12.6039	11.2486	13.6912	11.7331	12.8651	11.5437	13.6796	12.037	12.3878	2	2	6.1
O00622	Protein CYR61	CYR61	16.0263	16.9836	16.207	15.8688	13.6151	16.6211	16.1397	15.4768	14.4194	16.4561	15.7774	17.2216	12.6456	16.2859	17.3492	15.45	14.4114	15.4985	14.8668	10.5847	17.0373	17.0515	16.3467	17.9361	14.828	15.5611	15.4156	9	8	39.4
O00623	Peroxisome assembly protein 12	PEX12	14.7217	13.9252	13.5594	13.7645	14.4935	13.5863	14.1605	15.1032	12.6357	14.0411	13.2106	14.055	12.6929	13.5909	12.4263	13.1752	12.8756	12.2699	15.2854	10.9017	14.861	13.1046	15.334	14.851	15.0288	14.0372	10.9888	2	2	7.8
O00625	Pirin	PIR	13.5346	12.7337	12.8029	11.6887	11.392	13.0401	11.6707	13.444	13.1185	11.5658	11.94	13.0329	13.7952	14.3848	13.5692	11.6979	12.8192	12.3079	14.9491	12.1428	15.1387	13.2934	11.1841	13.4858	12.6993	12.1942	11.2164	5	5	23.8
O00629	Importin subunit alpha-3	KPNA4	18.1439	17.6925	17.924	18.2331	17.9847	17.7767	17.9813	18.0756	17.569	18.4048	18.2315	17.9159	18.0122	17.0434	17.4372	16.3483	16.3266	16.4991	17.7297	11.3082	17.6051	17.41	17.3447	18.0486	17.2758	17.5132	17.9419	16	12	58
O00635	E3 ubiquitin-protein ligase TRIM38	TRIM38	11.7255	14.3754	13.5372	15.7622	15.3927	15.6884	13.8097	14.6886	15.0706	12.4227	13.9492	13.2129	14.1685	12.6476	12.313	11.7956	12.9635	11.1832	13.4393	12.6645	13.3912	11.9671	10.5708	12.1331	12.4417	14.3762	13.284	5	5	19.1
O00712;O00712-5;O00712-4;O00712-2	Nuclear factor 1 B-type	NFIB	12.9419	12.6802	11.9256	12.724	12.1427	12.8608	12.0169	11.6283	12.8245	12.675	11.8281	12.0041	16.606	16.9827	15.7045	12.0632	11.2673	12.1321	13.6272	10.0701	11.5632	12.9177	10.8353	11.8189	12.2522	13.2281	12.5774	5	3	16.4
O00716;O00716-2	Transcription factor E2F3	E2F3	15.6618	16.0814	15.4887	15.7117	15.5133	15.902	15.9005	15.7168	16.2187	15.4765	15.215	15.7047	14.0249	14.171	13.6785	12.4787	13.2116	13.1972	14.1031	11.6913	14.0896	14.4859	12.9539	13.947	15.6509	15.6102	15.3232	4	4	10.8
O00743;O00743-2;O00743-3	Serine/threonine-protein phosphatase 6 catalytic subunit;Serine/threonine-protein phosphatase 6 catalytic subunit, N-terminally processed	PPP6C	13.1852	13.4776	11.7895	13.6713	13.5775	10.1647	12.8368	12.8408	12.7211	12.7174	11.7422	13.0707	13.4898	14.2413	14.3931	14.1957	12.9871	11.7521	14.0841	10.4482	13.6485	12.6514	12.3377	11.7592	14.0374	13.9275	12.4034	6	6	31.1
O00746-2;O00746	Nucleoside diphosphate kinase, mitochondrial	NME4	14.4869	14.8417	10.5516	13.4512	11.8772	12.9125	14.4835	14.6791	12.7632	14.0457	14.1456	14.9121	13.9846	13.5527	12.207	13.4343	14.3784	12.7168	12.3793	11.3574	13.1865	12.3521	10.8087	11.3163	14.0361	14.3736	14.9018	3	2	31.6
O00754;O00754-2	Lysosomal alpha-mannosidase;Lysosomal alpha-mannosidase A peptide;Lysosomal alpha-mannosidase B peptide;Lysosomal alpha-mannosidase C peptide;Lysosomal alpha-mannosidase D peptide;Lysosomal alpha-mannosidase E peptide	MAN2B1	12.6418	14.3228	12.0888	13.4558	14.0291	15.0015	13.5424	14.7046	16.4599	13.7002	14.4236	15.5402	14.9897	14.2922	14.3987	13.8856	16.3475	14.8752	17.2888	11.3182	15.6987	14.4585	12.5541	15.7733	15.5526	16.72	13.5732	24	24	38.1
O00762;O00762-2;O00762-3	Ubiquitin-conjugating enzyme E2 C	UBE2C	12.0367	13.6166	11.6129	12.0823	13.3367	12.8954	12.1667	11.9941	12.0375	12.0784	12.8153	13.3367	18.0244	18.161	17.7674	12.1599	14.4408	13.5676	11.9609	10.8004	13.2616	11.1655	11.9598	13.0351	14.1856	12.1461	13.547	4	4	46.9
O00764;O00764-3;O00764-2	Pyridoxal kinase	PDXK	12.4431	16.4286	12.3341	12.059	9.26658	12.7995	12.2597	13.3306	12.7017	14.7555	13.6676	13.8396	16.9677	16.7294	17.168	11.7936	16.6393	13.0626	15.6017	11.1541	16.271	10.2782	14.3868	13.3575	15.539	14.8284	13.1735	16	16	59.6
O00767	Acyl-CoA desaturase	SCD	12.767	13.0288	12.1992	12.9079	12.061	12.0292	12.0995	12.1335	12.1429	11.0244	11.0212	12.9642	13.3835	16.0874	16.893	12.9794	13.616	13.2972	15.7265	11.2262	12.143	13.6976	13.3737	12.2734	13.0759	13.6938	11.5287	4	3	17.8
O14494;O14494-2	Lipid phosphate phosphohydrolase 1	PPAP2A	15.921	15.8731	15.699	11.8215	14.338	12.8965	14.3025	13.41	14.4178	14.0567	12.3002	15.6884	12.3656	13.8943	12.363	14.0827	16.8821	15.5503	14.9876	11.3894	15.1939	15.7355	13.9101	14.9786	14.4523	15.3794	14.8338	3	3	15.5
O14495	Lipid phosphate phosphohydrolase 3	PPAP2B	17.1094	17.3598	17.7582	14.0029	16.0045	16.4412	11.406	11.1106	15.8786	15.2961	14.8521	16.6748	13.0968	13.6893	11.8445	15.5223	16.9172	15.3635	12.7144	11.1439	13.4827	11.9913	14.72	11.9247	18.4591	18.8352	17.4697	6	6	30.9
O14497;O14497-2;O14497-3	AT-rich interactive domain-containing protein 1A	ARID1A	17.892	17.0146	18.0925	15.9163	14.6609	15.7817	16.5233	16.8556	16.533	14.4808	16.3139	15.9717	17.6195	18.0183	18.1992	13.8023	13.5505	11.9401	17.7078	12.1865	17.5573	15.1437	14.972	14.9679	15.3995	16.0891	17.9704	18	13	14.5
O14519;O14519-2	Cyclin-dependent kinase 2-associated protein 1	CDK2AP1	16.0779	13.8081	16.0438	16.2773	15.5719	16.5051	16.1878	15.5127	17.0957	14.3791	10.0197	13.7695	16.9634	16.8419	16.594	12.5061	12.2409	10.8749	16.403	11.7237	16.3127	16.0341	12.8649	12.0018	12.644	12.8464	13.8561	2	2	20
O14531	Dihydropyrimidinase-related protein 4	DPYSL4	12.2964	12.5071	13.0591	12.2373	11.0665	13.5324	12.5552	11.2547	12.3282	12.6552	12.9985	11.7477	14.1647	14.9926	15.096	12.3242	13.6156	12.5022	12.0572	10.4027	12.2901	14.8532	11.9051	12.4649	13.3127	12.5368	10.4514	15	12	49.5
O14558	Heat shock protein beta-6	HSPB6	19.7425	19.1533	19.7463	16.5402	17.9904	16.5529	17.4673	16.7455	12.0876	19.0611	17.8477	19.0016	12.9937	13.1351	14.5813	12.7078	13.9078	11.2442	15.5216	10.3908	19.201	18.9161	16.9487	15.3797	17.1325	17.1122	17.4249	8	8	85
O14561	Acyl carrier protein, mitochondrial	NDUFAB1	17.761	12.3813	17.5888	15.4947	17.6966	16.1185	17.4338	17.2663	13.3054	18.1602	18.0862	12.4238	13.2037	16.1194	16.669	18.1319	12.3007	17.9013	16.6747	10.9794	11.7347	16.2903	13.4531	15.4035	17.8202	16.7386	17.7766	2	2	9.6
O14562	Ubiquitin domain-containing protein UBFD1	UBFD1	15.9806	17.24	16.1686	15.1054	15.3586	16.6658	15.6738	16.5819	16.9153	16.0579	15.7488	17.061	13.6115	13.324	12.8014	17.4813	17.1811	16.8339	16.0483	12.0865	13.0677	16.464	12.0055	11.0242	15.9341	17.9792	17.1616	5	5	27.2
O14578;O14578-4;O14578-3	Citron Rho-interacting kinase	CIT	14.4944	14.1846	15.4407	15.5735	15.7046	15.3887	15.3734	14.9371	14.4465	15.0331	15.1958	13.0548	15.215	14.7787	15.6066	11.6318	14.1649	12.7408	15.9381	9.52237	11.6163	13.0332	11.7551	11.6562	12.4232	12.7055	12.5587	15	15	10.3
O14579;O14579-2;O14579-3	Coatomer subunit epsilon	COPE	19.2631	19.121	19.2987	19.399	19.1843	19.0496	19.2517	19.125	18.0047	19.6976	19.8611	19.1945	18.875	19.26	19.3639	19.4214	17.2029	19.4651	20.1872	18.933	18.8357	19.6373	19.5905	19.8624	19.3377	19.2556	20.1156	17	17	76
O14593;O14593-3;O14593-2	DNA-binding protein RFXANK	RFXANK	12.4856	14.8869	12.4674	13.8379	14.1591	13.4288	10.7703	13.1744	13.1886	13.9994	13.557	14.7525	12.6904	12.9646	13.3375	13.5272	13.0035	12.4377	12.5804	11.1665	12.8122	12.3452	12.0808	11.5402	14.2989	14.2362	14.1565	4	4	25
O14602	Eukaryotic translation initiation factor 1A, Y-chromosomal	EIF1AY	12.8112	12.3705	13.2709	12.7016	11.8836	12.4283	15.336	15.1794	13.2682	11.4533	12.3642	12.981	13.902	12.4998	12.1802	12.6995	16.4699	12.3503	15.1386	10.2014	13.4428	13.4385	15.6932	11.5536	14.0188	12.4806	11.8366	7	2	54.2
O14613	Cdc42 effector protein 2	CDC42EP2	14.7489	13.1046	14.806	13.1284	15.3763	12.7708	14.1486	11.8223	13.197	14.668	11.9098	11.6319	15.5821	12.9781	11.7042	11.5935	13.4876	12.2663	12.6074	11.3064	16.3575	12.7599	12.4596	12.1407	12.0545	12.3473	11.8641	3	3	32.9
O14617;O14617-5;O14617-4;O14617-2;O14617-3	AP-3 complex subunit delta-1	AP3D1	19.2278	19.1219	19.4297	18.734	18.3021	18.4058	18.5551	18.5888	18.7497	19.7984	19.9297	20.3481	14.623	17.2237	17.0378	19.1558	19.1382	19.1797	18.831	10.4729	18.8114	18.8508	18.8503	18.7892	20.0177	20.0323	20.3708	39	39	41.5
O14639;O14639-5;O14639-3;O14639-2;O14639-6;O14639-4	Actin-binding LIM protein 1	ABLIM1	12.5874	13.2928	12.8196	12.4042	12.8761	11.8254	12.9472	9.99081	12.8183	13.9899	14.7533	12.5377	11.8104	12.6992	13.1574	13.0865	13.3725	12.3868	12.1182	9.67841	11.6147	12.0793	12.4066	12.7507	13.0164	14.4398	14.2476	4	4	8.7
O14641	Segment polarity protein dishevelled homolog DVL-2	DVL2	12.3185	13.8917	11.5189	12.5448	11.2266	12.9059	12.7053	14.4576	12.5951	12.574	12.423	12.2278	17.0276	16.6088	16.3704	12.4168	14.3688	11.4009	14.6379	11.7418	14.7198	12.478	13.5115	13.1135	12.1377	11.9811	12.4006	7	6	17
O14646;O14646-2	Chromodomain-helicase-DNA-binding protein 1	CHD1	15.7863	16.345	15.2222	15.6203	14.9327	14.421	15.2964	15.245	15.6701	13.5476	14.4436	15.402	16.0514	17.9128	16.8077	12.9994	13.3809	13.008	14.5632	11.2824	14.3583	13.8453	12.4788	12.5036	15.4651	15.7534	14.868	18	13	15.5
O14647;O14647-2	Chromodomain-helicase-DNA-binding protein 2	CHD2	16.5286	18.4743	16.6257	20.1197	19.855	18.8622	19.8254	19.5606	19.4179	16.5	16.0809	18.6336	20.4965	19.6398	19.2148	15.2405	16.6855	18.0131	17.5829	11.4517	17.3831	16.9403	17.0028	16.1199	19.6981	20.0839	19.0741	23	18	17.7
O14653;O14653-2;O14653-3	Golgi SNAP receptor complex member 2	GOSR2	16.5682	16.5796	16.219	15.9432	16.3862	15.0517	16.3359	15.6395	16.1311	17.1617	16.8071	17.3945	13.1711	14.1226	14.4495	15.0718	12.8462	15.7982	15.1544	10.8488	12.6588	17.0362	13.1864	14.744	16.5914	17.2985	17.0921	6	6	36.8
O14656	Torsin-1A	TOR1A	14.7934	14.1925	13.8247	11.7646	14.0305	13.4542	13.9876	13.5948	13.9566	13.6296	12.2405	14.4037	13.6385	14.8654	16.0554	11.2448	12.5326	12.4079	15.7522	11.2881	16.5847	14.3537	11.5132	15.4883	14.0652	14.6279	14.7334	9	9	35.2
O14657	Torsin-1B	TOR1B	12.5863	13.2899	11.603	12.1319	12.9	11.1541	9.6847	11.7119	13.947	11.549	13.4112	11.5663	16.9112	15.6512	16.5442	11.8132	13.3288	11.8855	15.2343	10.8799	14.613	13.3375	10.6147	11.9238	11.7634	13.0825	13.2893	5	5	18.8
O14662;O14662-5;O14662-2;O14662-4;O14662-6	Syntaxin-16	STX16	17.1952	17.397	16.1899	16.7401	16.4576	16.4182	16.4136	16.4675	16.7991	17.3478	16.5326	16.9215	17.3325	17.4774	16.8506	15.517	15.657	14.4415	16.7569	10.4213	16.6404	16.8782	14.9726	17.157	17.6252	16.9996	17.6734	8	8	43.4
O14672	Disintegrin and metalloproteinase domain-containing protein 10	ADAM10	17.2588	17.0027	16.8294	16.6218	16.1453	16.1858	16.1614	15.9961	16.1417	16.3533	16.2606	16.0694	17.2704	16.1117	16.7048	16.4527	16.6849	17.0616	16.689	11.4778	16.42	16.7109	15.8052	16.862	16.7843	16.9782	17.5316	13	7	30.9
O14681;O14681-3	Etoposide-induced protein 2.4 homolog	EI24	12.606	12.919	10.0822	14.2075	11.9757	15.5222	10.7107	14.1006	16.1895	11.9197	14.7792	15.0521	12.6078	13.4448	12.6146	14.9211	15.9577	15.2229	12.464	10.4089	13.0308	11.6215	16.0261	14.7022	16.1079	16.1245	14.5851	2	2	5.6
O14683	Tumor protein p53-inducible protein 11	TP53I11	13.4239	16.9452	13.5712	12.4226	11.7758	12.593	12.6314	11.9285	13.0406	17.0575	17.7755	19.8168	13.119	14.7325	12.1381	18.2664	14.3871	17.5735	12.2927	11.354	13.0211	12.4252	13.5334	12.2351	17.9953	17.703	16.0888	3	3	18.5
O14686;O14686-3	Histone-lysine N-methyltransferase 2D	KMT2D	12.0627	12.676	16.227	13.2417	11.3283	12.6016	11.6887	12.6448	13.224	12.0748	10.7516	13.3221	17.2023	19.2554	19.6184	12.2652	13.0146	13.5427	12.8657	11.6733	11.6216	13.2905	12.1644	13.9386	12.8906	12.426	17.1526	9	8	2.9
O14727;O14727-4;O14727-5;O14727-3;O14727-2	Apoptotic protease-activating factor 1	APAF1	12.4171	15.0852	12.8315	10.9832	11.1123	13.9319	12.1821	12.0121	13.0949	13.6333	12.3483	12.2342	14.2472	14.9077	15.4429	11.5761	13.5555	12.6529	13.4264	12.0969	12.9439	11.3215	12.11	12.2616	15.9549	16.2609	13.039	10	10	15.4
O14730;O14730-2	Serine/threonine-protein kinase RIO3	RIOK3	15.6334	15.9706	14.7406	15.6601	14.7554	15.5613	15.2428	15.6792	11.2905	15.1972	16.0923	13.5417	16.4109	16.1998	16.203	13.5978	12.7744	11.8511	15.1844	14.7798	15.4649	16.2427	16.2299	14.9182	14.7141	15.2545	11.9364	8	7	28.3
O14733;O14733-3;O14733-2;O14733-4	Dual specificity mitogen-activated protein kinase kinase 7	MAP2K7	13.4542	13.5993	13.5916	12.7717	13.0164	12.8642	12.7527	13.4727	11.8009	13.1404	12.2976	12.869	15.5852	15.8975	14.8923	13.1186	14.2484	12.51	13.9612	11.1629	12.0699	14.064	12.3797	10.9411	12.8599	11.7966	12.7635	3	3	16
O14734	Acyl-coenzyme A thioesterase 8	ACOT8	16.8297	17.783	17.7524	17.5327	17.5335	17.4503	17.0031	17.0644	16.2418	17.7597	17.3247	17.5606	15.1049	16.7391	16.7863	18.3368	18.741	18.2232	13.1901	10.7347	15.2423	15.1587	15.7264	15.855	18.1218	18.1018	18.3552	8	8	45.5
O14735;O14735-3;O14735-2	CDP-diacylglycerol--inositol 3-phosphatidyltransferase	CDIPT	12.5478	12.558	11.8075	13.3382	11.9632	15.3438	11.0203	12.9185	12.2711	10.8832	15.6502	15.6584	12.9096	14.3097	12.8616	16.4081	13.7252	14.7061	13.8065	12.219	12.1389	13.3544	11.3272	11.1951	16.6674	16.6298	14.0925	2	2	10.3
O14737;O14737-2	Programmed cell death protein 5	PDCD5	16.688	17.3161	16.0467	16.4557	15.9591	17.1785	14.4906	15.3983	17.9587	16.3888	16.3956	17.4225	19.946	19.8735	19.434	18.922	19.5603	18.567	17.2971	10.5461	16.4664	16.2976	15.3796	15.2893	18.2339	18.1291	16.7795	6	6	45.6
[truncated: 14,186 more rows]

## Sheet: Supplementary Table S4
Supplementary Table S4: Proteins in the supernatant that were commonly gained or lost in the transduced Meso-CAFs (109F-hT+, 125F-hT+) after hTERT transduction
[truncated: 40 more rows]

[truncated: 1 more sheets: Supplementary Table S5]
